# Supplementary material
Source: Research Square preprint supplement (doi:10.21203/rs.3.rs-9019651/v1)
Supplement: Supplementary file 1 [file 8eaa319cd3294cf1359bfc6b.xlsx]

## Sheet: Table S1
Supplementary Table S1. Compound Library used for high-throughput drug screening.
	Compound	Drug category and main target
1	5-Azacytidine	Antimetabolites
2	5-Fluorouracil	Antimetabolites
3	6-Mercaptopurine (Monohydrate)	Antimetabolites
4	6-Thioguanine	Antimetabolites
5	Clofarabine	Antimetabolites
6	Cytarabine (Hydrochlorid)	Antimetabolites
7	Cyclocytidine HCL	Antimetabolites
8	Fludarabine (phosphate)	Antimetabolites
9	Nelarabine	Antimetabolites
10	Gemcitabine	Antimetabolites
11	Methotrexate	Antimetabolites
12	Pentostatin	Antimetabolites
13	Cladribine	Antimetabolites
14	Dacarbazine	Antimetabolites/DNA alkylator/crosslinker
15	Vinblastine (sulfate)	Antimitotics
16	Vincristine (sulfate)	Antimitotics
17	Busulfan	Alkylating agents
18	Carmustine	Alkylating agents
19	Cyclophosphamide (Clafen) (Monohydrate)	Alkylating agents
20	Lomustine	Alkylating agents
21	Cisplatin	Alkylating agents
22	Oxaliplatin	Alkylating agents
23	Procarbazine (Hydrochloride)	Alkylating agents
24	Thio-TEPA	DNA alkylator/crosslinker
25	Temozolomide	Alkylating agents
26	Chlorambucil	Alkylating agents
27	Bendamustine (hydrochloride)	Alkylating agents
28	Mechlorethamine hydrochloride	DNA alkylator/crosslinker
29	Epirubicin (hydrochloride)	Topoisomerase inhibitor
30	Etoposide	Topoisomerase inhibitor
31	Idarubicin (hydrochloride)	Topoisomerase inhibitor
32	Mitoxantrone (dihydrochloride)	Topoisomerase inhibitor
33	Teniposide	Topoisomerase inhibitor
34	Daunorubicin (Hydrochloride)	Topoisomerase inhibitor
35	Doxorubicin (hydrochloride)	Topoisomerase inhibitor
36	Amsacrine (Hydochlorid)	Topoisomerase inhibitor
37	Dexamethasone	Glucocorticoid
38	Prednisone	Glucocorticoid
39	Prednisolone (Acetate)	Glucocorticoid
40	Belinostat	HDAC inhibior (HDACi)
41	CI-994 (Tacedinaline)	HDAC inhibior (HDACi)
42	Panobinostat	HDAC inhibior (HDACi)
43	Romidepsin	HDAC inhibior (HDACi)
44	Quisinostat	HDAC inhibior (HDACi)
45	Tubastatin A (Hydrochloride)	HDAC inhibior (HDAC6i)
46	Givinostat (ITF2357)	HDAC inhibior (HDACi)
47	Vorinostat	HDAC inhibior (HDACi)
48	Entinostat	HDAC inhibior (HDACi)
49	Ricolinostat	HDAC inhibior (HDAC6i)
50	Pracinostat	HDAC inhibior (HDACi)
51	Abexinostat	HDAC inhibior (HDACi)
52	EPZ-6438 ( Tazemetostat)	EZH2/HMTase inhibitor
53	GSK126	EZH2/HMTase inhibitor
54	GSK343	EZH2/HMTase inhibitor
55	GSK 525762A	Bromodomain inhibitor (BETi)
56	Paclitaxel	Microtubule Ploymerase inhibitor
57	JQ1	Bromodomain inhibitor (BETi)
58	Bortezomib	Proteasome inhibitor
59	MLN-9708 (Citrate)	Proteasome inhibitor
60	Carfilzomib	Proteasome inhibitor
61	Ganetespib	HSP90 inhibitor (HSP90i)
62	PUH71	HSP90 inhibitor (HSP90i)
63	AUY922 (LUMINESPIB)	HSP90 inhibitor (HSP90i)
64	NVP-HSP990	HSP90 inhibitor (HSP90i)
65	EC144	HSP90 inhibitor (HSP90i)
66	PF-04929113	HSP90 inhibitor (HSP90i)
67	BIIB021	HSP90 inhibitor (HSP90i)
68	Alisertib	Aurora Kinase A inhibitor
69	Aurora A Inhibitor I	Aurora Kinase A inhibitor
70	MLN8054	Aurora Kinase A inhibitor
71	MK-5108 (VX-689)	Aurora Kinase A inhibitor
72	Danusertib	Aurora Kinase A inhibitor
73	Barasertib	Aurora Kinase B inhibitor
74	Volasertib	Polo-like Kinase (PLK) inhibitor
75	BI2536	Polo-like Kinase (PLK) inhibitor
76	LEE011 (Ribociclib)	CDK inhibitor (CDKi)
77	LY2835219 (Abemaciclib)	CDK inhibitor (CDKi)
78	Dinaciclib	CDK inhibitor (CDKi)
79	SY-1365-THZ1	CDK inhibitor (CDK7i)
80	Cabozantinib (S-malate)	VEGFR inhibitor
81	Erlotinib	EGFR inhibitor
82	Gefitinib (Hydrochlorid)	EGFR inhibitor
83	Sunitinib (malate)	PDGFR/VEGFR inhibitor
84	Axitinib	VEGFR inhibitor
85	Midostaurin	PKC/VEGFR2/PDGFR/FLT3 inhibitor
86	Foretinib	VEGFR2/c-MET inhibitor
87	Dovitinib	FLT3/PDGFR/VEGFR/c-Kit inhibitor
88	Crenolanib	FLT3/PDGFR inhibitor
89	Pexidartinib	FLT3/c-Kit/CSF1R inhibitor
90	Lestaurtinib	FLT3 inhibitor
91	Quizartinib	FLT3 inhibitor
92	KW-2449	FLT3 inhibitor
93	Pacritinib	FLT3/JAK inhibitor
94	Gilteritinib	FLT3/AXL inhibitor
95	Buparlisib	PI3K inhibitor
96	Idelalisib	PI3K inhibitor
97	Pictilisib GDC-0941	PI3K inhibitor
98	GSK2636771	PI3K/AKT inhibitor
99	Alpelisib	PI3K/AKT inhibitor
100	Dactolisib (BEZ235)	PI3K/mTOR inhibitor
101	GSK2110183 (Afuresertib)	AKT inhibitor
102	Ro 08-2750	NGF/MSI2 inhibitor
103	ARQ-092 (Miransertib)	AKT inhibitor
104	Ipatasertib (GDC-0068)	AKT inhibitor
105	Deforolimus	mTOR inhibitor
106	Everolimus	mTOR inhibitor
107	Rapamycin	mTOR inhibitor
108	Temsirolimus	mTOR inhibitor
109	PF-04691502	PI3K/mTOR inhibitor
110	INK 128 (MLN0128)	mTORC1/2 inhibitor
111	BMS-911543	JAK inhibitor
112	AT9283	JAK inhibitor
113	Baricitinib (phosphate)	JAK inhibitor
114	CYT387 (Momelotinib)	JAK inhibitor
115	Ruxolitinib	JAK inhibitor
116	Tofacitinib (citrate)	JAK inhibitor
117	Fedratinib (TG101348)	JAK/FLT3 inhibitor
118	Gandotinib	JAK mutant (JAK2V617F) inhibitor
119	Tipifarnib	Farnesyl Transferase/Ras inhibitor
120	Lonafarnib	Ras inhibitor
121	Salirasib	Ras inhibitor
122	Dabrafenib (Mesylate)	Raf inhibitor
123	Sorafenib (Tosylate)	Raf inhibitor
124	Regorafenib (Monohydrate)	Raf inhibitor
125	Vemurafenib	Raf inhibitor
126	LGX818 (Encorafenib)	Raf inhibitor
127	Cobimetinib	MEK inhibitor
128	MEK162 (Binimetinib)	MEK inhibitor
129	Selumetinib	MEK inhibitor
130	Trametinib	MEK inhibitor
131	PD0325901	MEK inhibitor
132	PD184352	MEK inhibitor
133	Pimasertib	MEK inhibitor
134	SHP099 (Dihydrochloride)	Ras/ERK inhibitor
135	SCH772984	ERK1/2 inhibitor
136	GDC-0994	ERK inhibitor
137	Losmapimod	p38 MAPK inhibitor
138	Zanubrutinib	BTK inhibitor (BTKi)
139	Tirabrutinib	BTK inhibitor (BTKi)
140	Spebrutinib	BTK inhibitor (BTKi)
141	Ibrutinib	BTK inhibitor (BTKi)
142	Imatinib (Mesylate)	Bcr-Abl inhibitor
143	Radotinib	Bcr-Abl inhibitor
144	Nilotinib (Hydrochlorid)	Bcr-Abl inhibitor
145	Ponatinib	Bcr-Abl/FGFR/FLT3/VEGFR inhibitor
146	Bosutinib	Bcr-Abl/Src kinease inhibitor
147	Dasatinib (Hydrochlorid)	Bcr-Abl/Src kinease inhibitor
148	Rebastinib (DCC-2036)	Bcr-Abl inhibitor
149	Saracatinib	Bcr-Abl inhibitor
150	Bafetinib	Bcr-Abl/Src kinease inhibitor
151	Staurosporin	Protein kinase inhibitor (multiple, non-selective)
152	BSI-201 (Iniparib)	PARP inhibitor
153	Olaparib	PARP inhibitor
154	Rucaparib (phosphate)	PARP inhibitor
155	Veliparib (dihydrochloride)	PARP inhibitor
156	ABT-199 (Venetoclax)	Bcl-2 Family inhibitor
157	Obatoclax (Mesylate)	Bcl-2 Family inhibitor
158	Y-27632 (Dihydrochloride)	ROCK inhibitor
159	QNZ (EVP4593)	NF-κB inhibitor
160	Omaveloxolone	NF-κB inhibitor
161	Enasidenib	IDH2 inhibitor
162	Ivosidenib	IDH1 inhibitor
163	Birinapant	XIAP/cIAP1 inhibitor
164	Tariquidar	P-glycoprotein inhibitor
165	Enzastaurin	PKC inhibitor
166	KYA1797K	wnt/beta catenin inhibitor
167	Selinexor	CRM1 inhibitor
168	AZD6738	ATM/ATR inhibitor
169	Omacetaxine Mepesuccinate (Homoharringtonine)	Ribosom Inhibtor
170	Actinomycin D	Antibacterial
171	Bexarotene	Retinoid inhibitor
172	PND-1186	FAK inhibitor
173	Nintedanib (BIBF1120)	LCK inhibitor
174	BAY 80-6946 (Copanlisib)	PI3K inhibitor
175	Palbociclib	CDK inhibitor (CDKi)

## Sheet: Table S2
Supplementary Table 2. Drug Sensitivity Score (DSS) obtained from HT drug screening profiling of SEM wt, CNTRL cells and MSI2 KO clones.
	Compound	Replicate 1					Replicate 2					Replicate 3
		SEM wt	SEM CNTRL	SEM MSI2 KO 3.4	SEM MSI2 KO 3.7	SEM MSI2 KO 9.9	SEM wt	SEM CNTRL	SEM MSI2 KO 3.4	SEM MSI2 KO 3.7	SEM MSI2 KO 9.9	SEM wt	SEM CNTRL	SEM MSI2 KO 3.4	SEM MSI2 KO 3.7	SEM MSI2 KO 9.9
1	5-Azacytidine	8.74727	0	9.77991	4.39166	6.74029	2.08894	1.69572	13.4821	3.60042	4.27896	4.69133	2.64936	10.6343	7.99143	7.08192
2	5-Fluorouracil	0	0	0	0	0	0	0	0	0	0	0	0	0	0	0
3	6-Mercaptopurine (Monohydrate)	31.7072	30.0698	16.261	7.8039	15.2026	7.41137	11.8824	21.972	13.2078	14.9819	9.30471	6.34906	9.84135	14.6247	12.7403
4	6-Thioguanine	45.1499	38.3864	29.7727	19.1752	33.0565	15.6887	22.9066	39.2828	22.7996	25.2787	12.2783	19.203	28.7362	29.5846	26.2061
5	Clofarabine	73.6028	69.8479	79.2699	73.6392	77.5389	69.0935	69.0806	78.895	73.5426	71.5667	72.7116	73.61	80.7295	78.0145	77.355
6	Cytarabine (Hydrochlorid)	56.0714	50.8811	70.9863	58.9255	70.9144	31.5091	45.5583	71.1808	62.588	61.7944	36.5221	45.6618	74.4005	69.6458	71.5631
7	Cyclocytidine HCL	49.4666	47.3466	63.879	51.3571	61.6423	20.8651	33.9857	63.0454	53.0162	52.2626	24.73	36.6213	68.2174	66.3389	60.2811
8	Fludarabine (phosphate)	21.8722	10.7284	10.4291	4.83317	10.4375	3.61449	0.613926	17.9862	5.47221	5.12471	4.24774	0.636483	6.06707	15.9975	3.53272
9	Nelarabine	0	0	0	0	0	0	0	0	0	0	0	0	0	0	0
10	Gemcitabine	77.7106	77.765	71.9448	67.3127	76.4104	45.1218	63.2322	71.8989	58.8251	56.1081	43.1503	71.1411	74.1792	72.152	71.1295
11	Methotrexate	52.5642	50.5486	49.913	38.9223	51.5576	9.60272	35.4299	47.958	34.2117	34.6689	8.10353	50.7258	47.5737	51.5071	44.1236
12	Pentostatin	0	0	0	0	0	0	0	0	0	0	0	0	0	0	0
13	Cladribine	0	0	0	0	0	0	0	0	0	0	0	0	0	0	0
14	Dacarbazine	0	0	0	0	0	0	0	0	0	0	0	0	0	0	0
15	Vinblastine (sulfate)	88.5713	82.916	72.6016	79.2925	86.894	64.799	60.2348	70.4469	65.8575	63.2002	61.2634	81.6736	79.6703	86.4725	81.3035
16	Vincristine (sulfate)	91.3753	86.6231	74.1182	85.3507	85.3458	68.7425	63.8283	71.8838	68.6085	63.1776	67.2177	85.007	82.355	90.0608	88.7845
17	Busulfan	0	0	0	0	0	0	0	0	0	0	0	0.294094	0	0	0
18	Carmustine	0	0	0	0	0	0	0	0	0	0	0	0	0	0	0
19	Cyclophosphamide (Clafen) (Monohydrate)	0	0	0	0	0	0	0	0	0	0	0	0	0	0	0
20	Lomustine	0	0	0	0	0	0	0	0	0	0	0	0	0	0	0
21	Cisplatin	0	0	0	0	0	0	0	0	0	0	0	0	0	0	0
22	Oxaliplatin	0	0	0.274129	0.167855	0.218854	0	0	0.420397	0	0	0	0.00305258	0.00577554	0.549341	0.00565469
23	Procarbazine (Hydrochloride)	0	0	0	0	0	0	0	0	0	0	0	0	0	0	0
24	Thio-TEPA	0	0	0	0	0	0	0	0	0	0	0	0	0	0	0
25	Temozolomide	0	0	0	0	0	0	0	0	0	0	0	0	0	0	0
26	Chlorambucil	11.9423	10.9689	5.71302	3.06892	5.01803	0	2.69954	10.6682	3.25344	2.17847	3.66898	1.98615	3.48807	9.41061	3.50863
27	Bendamustine (hydrochloride)	0	0	0	0	0	0	0	0	0	0	0	0	0	0	0
28	Mechlorethamine hydrochloride	0	0	0	0	0	0	0	0	0	0	0	0	0	0	0
29	Epirubicin (hydrochloride)	70.9376	70.9084	63.8433	63.3762	67.6662	54.8453	60.1815	64.4645	52.8998	52.9445	54.7298	69.1765	63.0926	67.3429	63.9064
30	Etoposide	65.8222	81.5024	47.8046	42.7087	63.5576	39.3137	43.1266	63.3432	64.6217	40.6707	52.7933	78.9328	51.9302	59.3353	69.5669
31	Idarubicin (hydrochloride)	93.9347	93.731	91.5366	90.9328	93.24	84.3442	88.7264	92.1508	91.6267	84.6186	87.4235	94.0954	93.2936	94.58	93.8925
32	Mitoxantrone (dihydrochloride)	94.7536	94.5999	93.5914	93.2239	94.1421	86.9155	92.5234	93.8337	92.1153	87.8148	86.5584	94.1423	94.1815	95.0155	94.4361
33	Teniposide	85.8541	86.7336	82.1016	81.473	82.7004	71.6609	78.6862	81.5193	76.4741	75.4028	70.3037	85.2555	84.5975	86.1933	85.8391
34	Daunorubicin (Hydrochloride)	92.9727	92.5985	86.6588	84.0747	86.949	81.3733	85.4397	83.6676	80.9405	79.2896	80.8711	88.1312	85.28	88.3159	92.0631
35	Doxorubicin (hydrochloride)	88.8769	91.5006	83.0759	82.9444	85.9555	77.7248	78.7498	82.8826	79.9933	79.6988	82.4077	87.5766	84.2812	87.1535	88.7644
36	Amsacrine (Hydochlorid)	82.3411	84.8234	79.6639	76.1833	81.1776	70.6192	76.245	81.6324	76.2865	75.4585	69.525	81.2166	82.7107	84.8718	83.1944
37	Dexamethasone	0	43.0771	57.2531	49.8173	70.5843	0	15.244	74.0784	59.946	63.7157	1.6282	14.2621	73.9085	71.5843	73.0141
38	Prednisone	0	0	0	0	0	0	0	0	0	0	0	0	0	0	0
39	Prednisolone (Acetate)	0	8.68052	13.43	9.09718	31.3394	0	0	39.2454	17.512	23.97	0	0	29.7401	28.6272	24.3466
40	Belinostat	38.5658	43.0873	31.7809	25.9158	35.7645	29.3855	29.4589	43.0344	28.5799	27.3787	38.1021	18.6762	34.5256	31.0858	30.0462
41	CI-994 (Tacedinaline)	5.95072	5.22784	6.48562	3.69995	3.82452	5.80197	5.21799	10.0245	3.15377	3.16533	2.12866	4.27315	5.21611	4.93315	2.4219
42	Panobinostat	90.9271	91.8964	88.8245	85.5413	82.8575	91.616	82.0247	87.5559	83.8429	82.4079	87.2673	81.6515	79.1716	88.8296	80.8302
43	Romidepsin	95.0941	95.5181	95.3387	94.7048	94.5158	95.464	94.4637	94.9765	96.0512	94.6053	96.6788	95.1054	93.9463	95.5406	94.5302
44	Quisinostat	95.5145	95.2838	95.4062	94.6462	92.5265	95.9871	90.62	94.5856	92.9746	91.3535	96.4636	90.9257	94.35	95.4424	95.5978
45	Tubastatin A (Hydrochloride)	24.5655	19.6001	17.6525	1.90762	1.60187	2.01979	1.59043	26.054	2.06834	1.82386	1.00779	1.38765	1.335	20.8545	26.5129
46	Givinostat (ITF2357)	63.7281	55.334	57.4846	47.9536	51.053	58.1471	26.8771	48.7888	35.4141	39.5115	48.0802	27.6693	38.524	52.0451	35.0499
47	Vorinostat	50.5154	41.313	37.332	23.8111	28.1862	33.5488	16.1523	29.2013	16.2162	17.4943	22.752	16.9898	21.7586	31.628	16.5347
48	Entinostat	56.4978	41.826	41.2242	32.7572	29.5767	46.6336	16.6706	34.784	26.7477	33.4345	35.8035	21.5552	29.1074	36.6134	23.0949
49	Ricolinostat	41.1125	23.1082	22.1983	8.53934	14.167	20.6873	5.29082	19.8462	4.11964	10.103	13.9654	6.67138	11.2317	15.1056	5.49226
50	Pracinostat	69.1002	54.5702	61.3195	49.4148	54.6374	55.0932	35.4862	46.1931	36.307	41.9913	44.7364	34.883	39.2018	55.9623	29.2901
51	Abexinostat	73.0591	60.1191	66.9504	52.657	67.5071	64.3408	39.6127	52.517	41.1255	47.2878	53.6706	33.8059	55.9845	60.6785	35.1017
52	EPZ-6438 ( Tazemetostat)	0	0	0	0	0	0	0	0	0	0	0	0	0	0	0
53	GSK126	0.026373	4.00114	0.0125436	0.00934459	0.0169169	0.0303575	0	0	0	0.0121279	0.0107065	0	0.00134455	0.0129935	0
54	GSK343	0.0470879	8.04016	0.424983	0.0147842	0.00932532	1.0162	0	0	0	0.311321	0.312003	0	0.211768	0.514632	0.0791064
55	GSK 525762A	53.4325	49.7793	44.1396	37.4517	37.2194	43.2955	22.9518	42.3783	32.0706	30.3956	39.6808	25.0806	30.3545	47.3728	26.1944
56	Paclitaxel	79.5607	77.6179	24.3156	59.735	67.5479	37.3556	49.6319	32.4573	47.6522	40.4604	34.456	66.1878	26.4134	66.5933	64.2013
57	JQ1	75.4843	74.7226	67.3024	66.0589	66.8475	67.9542	53.9618	68.4121	64.4442	59.7144	66.0876	49.4244	57.0009	73.9067	49.2601
58	Bortezomib	94.3458	93.9717	94.044	93.8085	93.5891	93.5165	92.6207	94.6494	94.8841	93.3912	93.721	93.3763	92.9857	94.9161	93.5463
59	MLN-9708 (Citrate)	85.2317	86.6229	84.1241	82.0783	69.3961	83.4016	62.6106	83.3452	78.1558	82.1106	83.6683	60.6616	62.7885	85.4393	77.2881
60	Carfilzomib	92.9917	94.2724	93.7697	93.3438	93.1554	92.831	92.809	93.652	93.2008	93.3187	92.8983	93.1706	92.5559	94.6256	93.3906
61	Ganetespib	51.6666	75.1655	71.185	69.8979	62.2467	55.086	54.3354	71.8105	70.7417	68.8719	65.1312	56.6903	57.3479	77.0703	61.9184
62	PUH71	29.9694	47.6714	47.9215	42.8053	40.4863	25.0425	29.9408	48.6934	40.0813	33.7848	32.9083	32.5147	33.4026	53.0002	26.6637
63	AUY922 (LUMINESPIB)	58.9244	83.5078	75.1601	75.8802	66.5317	63.9467	58.7366	75.7483	76.2531	72.7997	72.4207	57.7462	67.4032	80.4175	60.275
64	NVP-HSP990	49.7216	77.3802	70.5682	71.7024	56.1122	55.1194	54.9578	71.6679	70.9582	66.588	60.2222	56.6611	58.5767	78.1381	60.2783
65	EC144	50.6046	76.0509	69.0272	68.4353	66.6401	51.5635	59.838	70.6279	68.0296	66.3172	57.5652	60.8054	62.1493	73.9043	59.8881
66	PF-04929113	40.5121	47.8872	38.6727	36.3	30.9077	34.5324	29.5055	38.4609	37.5446	29.6571	38.3971	25.8021	14.2296	40.9032	17.8925
67	BIIB021	31.4934	46.3988	43.041	40.0255	40.5789	26.8109	27.2406	48.1153	36.8854	34.1282	30.5623	29.5505	32.6038	47.0452	27.7947
68	Alisertib	57.2682	68.5245	56.4749	48.042	53.4508	25.4754	51.1462	51.8299	38.9124	40.1289	21.5106	60.9466	59.7885	60.6569	53.2022
69	Aurora A Inhibitor I	71.1307	75.2897	78.8207	73.5265	67.0882	73.3592	70.8374	76.0405	72.2872	70.9475	70.8036	61.2156	76.1384	79.5303	68.089
70	MLN8054	38.0916	49.8931	40.2373	30.7359	36.6037	10.8897	29.6493	36.6831	23.9758	20.7451	7.86599	35.4574	32.5908	42.3216	27.8537
71	MK-5108 (VX-689)	23.9339	43.6912	21.1412	10.9812	16.665	2.30865	16.5876	23.3034	11.6524	9.2242	6.71305	21.4478	16.8972	24.1	15.6267
72	Danusertib	40.1819	47.8029	38.4431	44.5698	36.6425	27.8032	21.6873	43.1797	31.4389	28.1651	23.8465	27.2109	31.8337	52.2315	27.1294
73	Barasertib	70.0674	66.3377	61.9226	64.0454	60.5073	41.7682	47.4268	60.2273	50.9231	52.5622	33.2132	44.1592	54.7079	69.5891	52.3196
74	Volasertib	85.5223	84.5226	83.4537	81.4824	80.3235	74.0022	79.5897	84.5352	77.4115	78.2617	68.0205	78.3344	80.5109	85.5238	80.1629
75	BI2536	91.4037	92.9554	92.1287	90.0133	88.7652	80.2156	88.3776	92.6132	90.2302	89.031	73.0504	90.1713	91.1606	92.4839	90.714
76	LEE011 (Ribociclib)	0	11.7394	0	3.28877	0	0	0	0	0	0	0	0	0	0	0
77	LY2835219 (Abemaciclib)	0	36.1497	6.59519	2.87628	0	13.1058	0	0	0	16.1522	10.3159	0	7.99702	12.6072	0
78	Dinaciclib	73.8719	82.6167	80.1996	78.9831	73.3602	83.1155	76.0669	79.7324	74.4567	77.7916	81.6046	73.0322	81.3509	85.3672	75.8265
79	SY-1365-THZ1	66.0572	65.1347	71.0282	73.135	63.0802	73.8826	65.354	67.9563	65.3075	65.7051	73.2508	59.7876	64.9978	71.9405	64.7528
80	Cabozantinib (S-malate)	0	14.4685	19.5301	26.9114	14.833	0	14.6179	0	19.7571	0	0	19.1789	11.2895	26.2403	0
81	Erlotinib	0	0	0	1.9455	3.2931	0	0	0	1.08034	0	0	0.471962	1.02332	7.46515	0.666455
82	Gefitinib (Hydrochlorid)	0.280317	0.59331	0	0.572154	0.201249	12.2311	0	0	0	0	0	0	0.0109755	2.7921	0.0652476
83	Sunitinib (malate)	38.2531	43.7066	48.9708	51.8358	41.1323	41.8817	30.3254	48.2889	47.6288	42.3664	43.2083	36.1205	40.1083	56.3002	37.4766
84	Axitinib	15.0556	34.0105	20.7285	9.54894	9.42106	11.6041	10.4903	10.8703	8.76375	8.31818	5.35517	15.3615	9.41765	13.5731	10.301
85	Midostaurin	52.4008	55.8818	56.7465	55.1925	51.0824	50.6004	39.3121	52.3969	52.6702	46.643	47.2126	45.124	50.5382	58.0202	49.1696
86	Foretinib	58.8622	62.6539	68.4571	70.888	63.1582	58.0467	53.5907	66.7112	68.782	60.7167	53.486	58.4014	63.0542	73.6271	64.3279
87	Dovitinib	52.2814	59.5642	62.0729	65.2451	58.3252	51.6169	43.9635	56.1689	62.2531	52.0896	44.7565	49.5711	56.2603	70.9683	55.8444
88	Crenolanib	41.2356	51.9421	53.6266	58.2342	45.6825	49.0573	29.3125	49.5323	51.2363	45.9734	36.0123	36.2935	42.7694	60.8934	40.8262
89	Pexidartinib	0	8.33721	7.29053	18.7735	0	0	0	0	9.20092	0	0	3.14817	0	21.8495	0
90	Lestaurtinib	63.9181	66.7118	70.1283	71.7152	70.995	61.8119	53.0675	66.9142	66.1012	62.9775	56.4785	57.8211	65.5643	77.6619	63.0518
91	Quizartinib	37.8886	47.9512	52.183	54.2815	44.8783	28.1319	31.3547	46.1191	49.8005	41.0533	29.0096	39.9334	43.328	59.4108	38.6825
92	KW-2449	37.216	49.2026	48.0259	49.5265	40.0293	35.2344	24.7771	44.5509	44.9476	34.1237	27.1357	32.4696	38.3234	53.7087	36.2956
93	Pacritinib	42.0922	51.5848	45.3564	35.9539	36.8459	37.6623	21.5586	42.9548	35.4308	32.806	30.168	27.6253	29.8165	48.9598	34.6027
94	Gilteritinib	45.5614	54.7712	52.2118	54.476	47.5746	47.7209	35.9996	53.5023	51.7592	42.4952	46.1339	41.7918	46.8383	62.1312	43.5245
95	Buparlisib	21.3755	36.1664	19.2894	16.5206	16.847	14.8219	9.35232	13.8763	13.2432	10.1408	10.779	13.4985	10.2088	27.0587	12.4984
96	Idelalisib	0	0	0	0	0	0	0	0	0	0	0	0	0	0	0
97	Pictilisib GDC-0941	0	6.47505	0	0	0	0	0	0	0	0	0	0	0	0	0
98	GSK2636771	0	0	0	0	0	0	0	0	0	0	0	0	0	0	0
99	Alpelisib	0	0	0	0	0	0	0	0	0	0	0	0	0	0	0
100	Dactolisib (BEZ235)	0	18.4172	4.46444	3.75071	0	0	1.90023	4.29396	5.72261	3.95246	8.28203	4.2968	0	9.10248	0
101	GSK2110183 (Afuresertib)	0	9.36964	0	1.20749	0	0	0	0	0	0	0	0	0	3.98042	0
102	Ro 08-2750	0	0	0	0	0	0	0	0	0	0	0	0	0	0	0
103	ARQ-092 (Miransertib)	19.6084	32.8876	15.1734	10.1122	7.76339	19.1707	11.8774	13.5795	20.9836	10.2155	26.1862	10.9473	1.30334	16.2102	11.5872
104	Ipatasertib (GDC-0068)	3.01496	13.8519	2.22824	2.47415	0	0	0	0	8.17366	0	8.30757	0	0	3.71733	0
105	Deforolimus	0	30.396	0	0	12.8286	0	0	0	0	0	0	0	0	17.9148	0
106	Everolimus	32.186	42.8428	35.7164	32.2151	31.7419	33.8821	0	0	7.19463	26.4192	25.4996	14.4177	14.1088	33.6238	0
107	Rapamycin	30.5414	42.3616	31.8182	25.8547	30.3575	33.8507	0	0	0	0	0	0	0	29.4487	0
108	Temsirolimus	34.7266	43.6682	35.1991	31.4651	28.3739	36.1686	0	0	14.7269	27.5622	33.0899	18.7055	18.2641	37.0764	23.6582
109	PF-04691502	36.8337	59.2666	50.5948	45.6555	46.0396	32.3348	40.9689	49.891	49.0415	44.033	37.8201	40.5821	43.3111	54.2826	41.8058
110	INK 128 (MLN0128)	31.7171	45.222	34.8395	35.2313	27.3519	33.2434	26.2734	34.5618	37.0755	31.842	35.0172	32.6114	17.0357	41.041	25.9044
111	BMS-911543	0	0	0	0	0	0	0	0	0	0	0	0	0	7.41771	0
112	AT9283	60.4534	69.1382	59.5853	63.8279	58.4997	49.8725	49.7372	60.4897	55.309	50.575	45.1709	56.101	58.1411	63.624	55.2722
113	Baricitinib (phosphate)	0	0	0	0	0	0	0	0	0	0	0	0	0	0	0
114	CYT387 (Momelotinib)	0	22.2085	10.2325	8.3533	6.38864	6.95457	0	15.665	4.5879	4.67372	2.00116	3.7741	5.92978	15.1231	4.13718
115	Ruxolitinib	0	0	0	0	0	0	0	0	0	0	0	0	0	0	0
116	Tofacitinib (citrate)	0	0	0	0	0	0	0	0	0	0	0	0	0	0	0
117	Fedratinib (TG101348)	30.3711	43.7268	34.4454	27.3748	28.5069	39.0452	20.8358	41.6512	29.7482	27.4202	31.0344	18.9143	24.5182	43.1867	22.815
118	Gandotinib	28.2747	41.4042	38.1249	29.6853	28.9668	29.428	21.9932	42.7655	27.1839	28.5884	20.0963	23.5635	27.1744	43.6827	25.5697
119	Tipifarnib	4.92705	31.3505	4.24056	13.9623	8.05598	22.4069	7.02366	9.84577	11.1354	15.0932	7.02122	3.63935	9.51281	25.4865	5.50595
120	Lonafarnib	1.94824	9.7598	0	2.30067	1.93168	0	0	0	2.03367	0	0	1.82248	0.536662	2.94077	1.40444
121	Salirasib	0	0	0	0	0	0	0	0	0	0	0	0	0	0	0
122	Dabrafenib (Mesylate)	0	0	0	0	0	0	0	0	0	0	0	0	0	0	0
123	Sorafenib (Tosylate)	29.5345	33.4017	38.9895	41.9708	31.2735	28.5082	25.9227	24.1522	41.7385	33.2441	23.9696	28.486	21.4137	44.245	29.6235
124	Regorafenib (Monohydrate)	20.786	29.6853	30.7667	30.0625	19.6775	18.1636	9.22705	7.63423	29.5387	18.5898	10.6289	15.8047	7.18029	33.6795	17.1132
125	Vemurafenib	0	0	0	0	0	0	0	0	0	0	0	0	0	0	0
126	LGX818 (Encorafenib)	0	0	0	0	0	0	0	0	0	0	0	0	0	2.69552	0
127	Cobimetinib	20.8596	20.9845	25.6227	27.4208	12.52	20.1989	3.32113	3.17605	20.5072	7.88739	0	2.62912	4.86825	34.4709	5.89775
128	MEK162 (Binimetinib)	0	0	0	8.59336	0	0	0	0	3.72145	0	0	0	0	18.4362	0
129	Selumetinib	0	0	0	0	0	0	0	0	0	0	0	0	0	0	0
130	Trametinib	0	0	0	0	0	0	0	0	12.1717	0	0	0	0	25.0233	0
131	PD0325901	0	0	0	10.8108	0	0	0	0	0	0	0	0	0	16.537	0
132	PD184352	0	0	0	9.19883	1.15782	0	0	2.03696	17.9656	7.30257	0	1.15663	0	30.7525	3.36963
133	Pimasertib	0	0	0	11.2122	0	0	0	0	6.01201	0	0	0	0	0	0
134	SHP099 (Dihydrochloride)	0	0	0	0	0	0	0	0	4.66743	0	0	0	0	12.5154	0
135	SCH772984	0	0	0	0	0	0	0	0	0	0	0	0	0	0	0
136	GDC-0994	18.0673	33.307	15.5511	6.77444	15.2064	12.4295	3.58894	2.93216	6.64187	6.24931	1.79377	4.54869	2.83139	21.4756	3.70338
137	Losmapimod	0	0	0	0	0	0	0	0	0	0	0	0	0	0	0
138	Zanubrutinib	0	0	0	0	0	0	0	0	0	0	0	0	0	0	0
139	Tirabrutinib	38.1034	51.4083	37.2351	24.6061	36.4366	37.5622	16.5869	14.0728	25.8114	19.3135	37.0066	26.3677	16.2077	39.968	22.2485
140	Spebrutinib	24.3732	38.9857	20.1551	15.6733	21.5666	19.8111	8.42993	11.5799	18.9783	10.2632	16.6613	10.657	12.9486	28.0975	12.2887
141	Ibrutinib	0	0	0	0	0	0	0	0	0	0	0	0	0	0	0
142	Imatinib (Mesylate)	0	0	0	0	0	0	0	0	0	0	0	0	0	0	0
143	Radotinib	0	0	0	0	0	0	0	0	0	0	0	0	0	3.93337	0
144	Nilotinib (Hydrochlorid)	0	0	0	0	0	0	0	0	0	0	0	0	0	0	2.38819
145	Ponatinib	42.5976	53.308	45.2767	51.7638	43.6516	43.3419	26.8016	38.6758	45.7823	40.3524	48.5917	35.857	32.6515	59.3454	47.2143
146	Bosutinib	43.1457	44.4934	20.9164	12.8475	15.3237	35.5723	6.0437	11.5099	19.2182	11.2106	39.7751	11.2729	12.8782	36.265	14.6266
147	Dasatinib (Hydrochlorid)	11.9927	23.2444	0	5.32945	1.31629	0	0.815805	1.63545	11.5424	2.35402	0	2.21642	0.958592	17.8557	0
148	Rebastinib (DCC-2036)	40.9957	48.067	49.5921	53.6754	44.9123	36.9233	22.2976	43.9091	54.7667	37.9398	37.6764	32.5758	39.7913	60.632	45.0236
149	Saracatinib	9.72014	25.1374	0	0	0	0	0	1.11249	0	0	0	0	0.914291	0	0
150	Bafetinib	24.4441	24.7562	17.6903	2.23294	1.14582	22.6018	1.95335	3.18095	8.48983	2.82526	11.2077	1.74777	1.31757	18.4444	2.63531
151	Staurosporin	90.9301	91.4973	91.0961	91.7822	91.7615	90.5057	78.4127	90.9671	90.1616	85.5209	90.7991	83.253	88.4915	93.247	90.6658
152	BSI-201 (Iniparib)	0	0	0	0	0	0	0	0	0	0	0	0	0	0	0
153	Olaparib	13.3795	22.5786	0	2.90865	6.29535	0	0.682436	0	0	0	0	1.05624	0.517706	7.37498	1.70442
154	Rucaparib (phosphate)	0	18.5408	0	0	5.5478	0	0	0	0	0	0	0.543334	0	0	0.738757
155	Veliparib (dihydrochloride)	0	0	0	0	0	0	0	0	0	0	0	0	0	0	0
156	ABT-199 (Venetoclax)	64.5264	66.8109	22.1171	61.8797	64.8778	62.1134	0	0	0	58.882	60.6508	0	0	66.5766	67.0519
157	Obatoclax (Mesylate)	28.2724	46.1185	19.341	17.0798	24.0697	22.4204	11.7145	11.2182	16.6379	20.4684	20.6657	12.5112	8.25837	21.9873	21.7174
158	Y-27632 (Dihydrochloride)	0	0	0	0	0	0	0	0	0	0	0	0	0	0	0
159	QNZ (EVP4593)	0	0	26.3485	51.6661	30.171	0	10.1863	4.58331	0	0	0	31.8053	17.0255	25.0907	0
160	Omaveloxolone	52.1325	52.9121	57.4525	54.6719	60.8117	45.8045	27.1388	38.5394	51.1468	45.9592	45.7453	36.5079	55.9457	62.6442	53.9233
161	Enasidenib	0	0.67335	0	0	0	0	0	0	0	0	0	0	0	0	0
162	Ivosidenib	0	0	0	0	0	0	0	0	0	0	0	0	0	0	0
163	Birinapant	0	0	0	0	0	0	0	0	0	0	0	0	0	0	0
164	Tariquidar	0	0	0	0	0	0	0	0	0	0	0	0	0	0	0.02394
165	Enzastaurin	6.80916	0.990003	7.51326	10.2382	4.06965	0	0	1.89504	23.3091	6.86482	0.228121	1.70603	0.639594	21.2656	4.62601
166	KYA1797K	0	0	0	0	0	0	0	0	0	0	0	0	0	0	0.510079
167	Selinexor	45.5704	47.3113	44.8386	41.9567	40.8013	48.5801	41.1431	44.2173	50.1211	48.3653	35.6134	42.9089	27.7486	51.266	39.3165
168	AZD6738	47.2707	52.4993	44.6823	40.3539	41.7594	30.5553	28.4041	41.8107	42.3072	37.1385	20.3903	38.488	37.7054	56.6539	46.4977
169	Omacetaxine Mepesuccinate (Homoharringtonine)	67.786	77.1612	72.1302	70.8733	69.2574	71.2294	57.4364	65.236	65.0701	66.4339	69.6199	68.3435	65.6251	78.4495	75.0172
170	Actinomycin D	68.9471	74.6162	74.3542	76.9552	74.3784	73.1064	76.0687	73.4526	74.057	75.591	67.1309	82.4336	77.8816	80.7122	81.9757
171	Bexarotene	28.853	25.8872	33.9994	29.1715	31.5921	26.6452	20.384	35.4575	39.5344	29.2761	25.8148	23.6916	27.7836	43.095	20.5915
172	PND-1186	9.26531	17.3883	12.2619	15.4609	16.3789	12.5733	6.49918	12.9552	20.2625	10.4497	10.813	10.0308	7.49593	24.8364	12.8596
173	Nintedanib (BIBF1120)	0.809506	1.91739	0	0	0.554787	5.94045	0.083292	0.0104422	0.351245	0.300762	1.72033	0.781933	0.248186	0.666587	0.425775
174	BAY 80-6946 (Copanlisib)	16.6855	38.4569	15.8508	17.9592	12.345	14.2882	9.48835	11.8567	34.247	12.0678	26.5611	19.2753	6.4366	21.0412	15.7951
175	Palbociclib	11.0265	21.9961	11.7465	0	4.73691	0	0	0	9.34092	0	0	5.32931	4.07876	8.88497	3.12894

## Sheet: Table S3
Supplementary Table S3. RNAseq analysis of SEM MSI2 KO vs SEM CNTR cells (untreated samples).
Gene	baseMean	log2FoldChange	lfcSE	stat	pvalue	padj	padj_NoNA	CNTRL_Dexa1_S2	CNTRL_Dexa2_S4	CNTRL_Dexa3_S6	CNTRL_untr1_S1	CNTRL_untr2_S3	CNTRL_untr3_S5	MSI2KO3-4_Dexa_S8	MSI2KO3-4_untr_S7	MSI2KO3-7_Dexa_S10	MSI2KO3-7_untr_S9	MSI2KO9-9_Dexa_S12	MSI2KO9-9_untr_S11
A1BG	15.4076	-0.250678	0.254255	-0.985932	0.324166	NA	1	19.2688	13.3299	25.5347	13.3671	18.2318	20.6179	11.0553	9.27719	9.85217	15.6744	17.4589	11.2228
A1BG-AS1	370.054	0.267749	0.127174	2.10537	0.0352595	0.124279	0.124279	366.107	382.125	326.694	325.952	343.233	335.9	416.783	412.172	348.409	346.043	371.487	465.747
A1CF	1.45147	0.080393	0.0988683	0.813132	0.416142	NA	1	0	0	6.75918	0	0	0.859079	0	0	0.895652	6.02862	1.93988	0.935235
DAAM1	2539.04	-3.04641	0.0734861	-41.4556	0	0	0	5685.67	5544.37	5376.56	2981.9	3065.32	2853	1258.09	343.256	1267.35	327.957	1417.08	347.907
A2M-AS1	5.64113	0.52498	0.221193	2.3734	0.0176254	NA	1	8.25805	2.66599	3.7551	1.02824	0.792686	2.57724	4.4221	7.95188	6.26956	10.8515	11.6393	7.48188
A2ML1	4.91226	0.23359	0.131955	1.77022	0.0766899	NA	1	0	2.66599	11.2653	1.02824	0	1.71816	0	1.32531	0	31.3488	6.78958	2.80571
A2ML1-AS1	0.301431	0.0427829	0.0580207	0.737374	0.460895	NA	1	0	0	0	0	0	0	0	0	0	3.61717	0	0
A2ML1-AS2	0.583213	0.0657848	0.0585228	1.12409	0.260976	NA	1	0	0	0	0	0	0	0	0	0	6.02862	0.96994	0
A3GALT2	3.67914	0.107928	0.14132	0.763709	0.44504	NA	1	0	2.66599	8.26123	2.05648	0	3.43631	1.10553	0	1.7913	13.263	9.6994	1.87047
A4GALT	4.1975	0.0947277	0.101799	0.930532	0.352096	NA	1	0	2.66599	6.75918	0	0	4.29539	0	0	0.895652	24.1145	11.6393	0
A4GNT	0.405547	0.0172275	0.058049	0.296775	0.766638	NA	1	0	0	0.751021	0	0	0	0	0	0	1.20572	2.90982	0
AA06	0.451294	0.0291251	0.0581383	0.500963	0.616397	NA	1	0	0	3.00408	0	0	0	0	0	0	2.41145	0	0
AAAS	1171.7	0.0716993	0.0706956	1.0142	0.310489	0.544539	0.544539	1050.15	1136.6	1119.02	1119.75	1218.36	1133.12	1174.07	1220.61	1297.8	1231.04	1156.17	1203.65
AACS	613.974	0.00250833	0.095236	0.0263381	0.978988	0.990216	0.990216	534.021	601.625	528.718	646.763	609.576	599.637	737.386	609.644	616.209	622.154	636.281	625.672
AADAC	0.966642	-0.0248732	0.082581	-0.301198	0.763264	NA	1	0	0.888663	3.00408	1.02824	0	0.859079	0	0	0	0	5.81964	0
AADACL2	0.50579	0.0064073	0.0583333	0.10984	0.912537	NA	1	0	0	0	0	0	1.71816	0	0	0	2.41145	1.93988	0
AADACL2-AS1	1.04426	0.0625803	0.0836128	0.748454	0.454187	NA	1	0	0	3.00408	0	0	0.859079	0	0	0	4.8229	2.90982	0.935235
AADACL3	1.34603	0.040998	0.0633707	0.646955	0.517661	NA	1	0	0	6.00816	0	0	0	0	0	0	7.23435	2.90982	0
AADACL4	0.74297	0.0425103	0.0675623	0.629201	0.529218	NA	1	0	0	2.25306	0	0	0	1.10553	0	0	3.61717	1.93988	0
EYA1	823.409	3.47915	0.128771	27.018	9.08144e-161	6.5795e-157	6.5795e-157	105.978	100.419	110.4	100.768	110.183	119.412	1376.38	1316.04	1806.53	1600	1617.86	1516.95
AAGAB	973.541	-0.0751312	0.0890066	-0.844109	0.398609	0.629183	0.629183	1176.77	1198.81	1127.28	881.202	838.662	975.054	965.124	902.538	933.269	763.223	1033.96	886.603
AAK1	2281.89	0.201524	0.124464	1.61914	0.105418	0.272339	0.272339	2466.4	2278.53	2496.39	1935.15	1814.46	1780.01	2398.99	1968.09	2369.9	2005.12	3427.77	2441.9
ZNF518B	339.641	-5.31132	0.199528	-26.6194	4.05255e-156	1.95738e-152	1.95738e-152	670.278	660.277	543.739	730.051	730.857	722.485	0	0	4.47826	9.64579	3.87976	0
AAMP	1700.75	-0.144026	0.101711	-1.41603	0.156767	0.356715	0.356715	1800.25	1676.91	1523.07	1870.37	1925.43	1810.94	1762.21	1774.59	1675.76	1609.64	1310.39	1669.39
AANAT	5.21385	0.193298	0.140439	1.37639	0.168701	NA	1	1.37634	5.33198	15.7714	0	1.58537	2.57724	2.21105	0	0.895652	28.9374	3.87976	0
AAR2	361.985	-0.0535626	0.135807	-0.394401	0.693285	0.844318	0.844318	339.956	396.344	293.649	366.054	401.892	378.854	353.768	360.485	403.939	344.837	308.441	395.604
AARD	2.1821	0.112884	0.104765	1.07749	0.281259	NA	1	0	0.888663	8.26123	0	0	0.859079	0	2.65063	0	9.64579	3.87976	0
PBX3	1779.41	1.59967	0.0646195	24.7553	2.72025e-135	9.85411e-132	9.85411e-132	766.622	807.795	703.706	835.959	889.394	821.279	2888.74	2547.25	2964.61	2663.44	2809.92	2654.2
AARS2	1250.95	0.0565982	0.0759968	0.744745	0.456426	0.677485	0.677485	1241.46	1237.91	1253.45	1193.79	1208.85	1341.02	1258.09	1366.4	1254.81	1216.58	1123.19	1315.88
AARSD1	38.3771	-0.0414554	0.232284	-0.178468	0.858355	0.933191	0.933191	49.5483	31.9919	38.302	38.0449	45.1831	37.7995	28.7437	31.8075	38.513	48.229	35.8878	36.4742
AARSD1P1	11.1492	-0.363275	0.247049	-1.47046	0.141438	NA	1	8.25805	15.1073	17.2735	15.4236	10.3049	24.0542	6.63316	6.62657	2.68696	8.44007	7.75952	11.2228
AASDH	326.598	0.0792655	0.137558	0.576234	0.564457	0.758303	0.758303	278.021	295.036	307.918	294.077	297.257	336.759	424.522	377.714	384.235	311.077	313.291	299.275
AASDHPPT	1687.72	0.012059	0.0978249	0.123271	0.901893	0.955574	0.955574	1676.38	1689.35	1500.54	1764.46	1769.28	1657.16	1881.61	1824.96	1688.3	1704.89	1387.98	1707.74
SDC2	2139.35	3.76541	0.175199	21.4922	1.84307e-102	5.34121e-99	5.34121e-99	546.408	470.991	464.131	149.095	152.196	161.507	6132.35	4242.33	3718.75	2419.89	3923.41	3291.09
AATBC	6.03116	0.221844	0.152814	1.45172	0.146579	NA	1	1.37634	1.77733	19.5265	0	0.792686	2.57724	1.10553	0	3.58261	25.3202	11.6393	4.67618
AATF	3678.07	-0.193368	0.0961522	-2.01106	0.0443192	0.147561	0.147561	3476.64	4073.63	4193.7	3842.53	3682.82	4703.46	2913.06	3439.19	3311.23	3566.53	3300.71	3633.39
AATK	24.1515	0.200469	0.159184	1.25936	0.207901	0.427848	0.427848	1.37634	15.9959	62.3347	2.05648	1.58537	28.3496	2.21105	1.32531	4.47826	108.515	48.497	13.0933
ABALON	7.17433	-0.0914273	0.234713	-0.389529	0.696885	NA	1	6.88171	7.1093	6.00816	8.22592	10.3049	6.01355	7.73868	1.32531	8.06087	12.0572	5.81964	6.54665
MAP3K1	2208.65	1.60668	0.076925	20.8863	7.13799e-97	1.72382e-93	1.72382e-93	1255.22	1106.39	1064.2	992.252	944.089	902.892	3566.43	2936.89	4084.17	2879.27	3711.96	3060.09
ABCA1	13.2053	0.268452	0.221747	1.21062	0.226042	NA	1	8.25805	9.77529	24.0327	11.3106	9.51223	12.0271	2.21105	10.6025	1.7913	42.2003	15.519	11.2228
ABCA10	5.1521	-0.0908916	0.200035	-0.454379	0.649556	NA	1	4.12902	7.99797	9.01225	4.11296	3.96343	6.01355	1.10553	1.32531	2.68696	6.02862	13.5792	1.87047
ABCA11P	18.9911	-0.142874	0.254372	-0.561672	0.57434	0.765981	0.765981	24.7741	16.8846	13.5184	26.7342	15.8537	18.0406	24.3216	14.5784	21.4956	10.8515	17.4589	23.3809
ABCA12	12.5025	-0.520031	0.246113	-2.11298	0.0346029	NA	1	13.7634	18.6619	12.7673	17.4801	19.0245	21.477	2.21105	5.30125	8.06087	12.0572	14.5491	4.67618
ABCA13	4.25322	0.193454	0.13624	1.41994	0.155624	NA	1	0	1.77733	12.0163	0	0.792686	3.43631	0	1.32531	1.7913	24.1145	4.8497	0.935235
ABCA15P	37.236	-0.362776	0.23512	-1.54294	0.122845	0.302562	0.302562	37.1612	23.9939	34.5469	53.4685	39.6343	50.6856	42.01	33.1328	27.7652	38.5832	36.8577	28.9923
ABCA17P	14.2824	-0.155961	0.201689	-0.773276	0.439359	NA	1	22.0215	15.9959	33.7959	21.593	15.8537	14.6043	1.10553	0	4.47826	26.5259	12.6092	2.80571
ABCA2	3135.62	0.0968883	0.0852494	1.13653	0.255736	0.486429	0.486429	3257.8	3158.31	2871.9	3171.09	3177.88	2922.59	3264.62	3561.12	2886.69	2890.12	2982.57	3482.82
ABCA3	108.493	-0.450668	0.220856	-2.04055	0.0412955	0.140463	0.140463	173.419	198.172	238.074	166.575	147.44	158.07	9.94973	3.97594	17.913	77.1663	74.6854	36.4742
ABCA4	7.79681	0.217949	0.149266	1.46014	0.144253	NA	1	2.75268	1.77733	27.0367	1.02824	1.58537	6.01355	1.10553	0	0.895652	44.6118	5.81964	0.935235
ABCA5	96.7362	-0.312978	0.192101	-1.62924	0.103262	0.268823	0.268823	125.247	93.3096	103.641	129.558	96.7077	100.512	82.9144	71.5669	85.0869	77.1663	95.0541	100.07
ABCA6	5.34885	0.160225	0.136823	1.17104	0.241583	NA	1	0	3.55465	16.5225	0	1.58537	3.43631	1.10553	0	1.7913	26.5259	8.72946	0.935235
ABCA7	1045.37	0.0244128	0.0823252	0.296541	0.766817	0.88816	0.88816	1112.08	1020.19	946.286	954.207	902.077	919.214	1291.25	935.671	1273.62	865.71	1307.48	1016.6
ABCA8	4.51041	0.111072	0.103851	1.06953	0.284833	NA	1	0	0.888663	12.7673	0	0	1.71816	0	0	1.7913	25.3202	11.6393	0
ABCA9	3.59072	0.0199427	0.140049	0.142398	0.886766	NA	1	0	0.888663	11.2653	5.1412	3.96343	3.43631	0	1.32531	0.895652	13.263	2.90982	0
ABCA9-AS1	0.784931	0	0.0705375	0	1	NA	1	0	0.888663	3.7551	0	0	0	0	0	0.895652	0	3.87976	0
ABCB1	77.0839	0.46927	0.213509	2.19789	0.0279569	0.104514	0.104514	81.2042	82.6457	59.3306	54.4967	72.1344	53.2629	99.4973	115.302	73.4435	79.5778	72.7455	81.3655
ABCB10	671.612	0.208549	0.145622	1.43213	0.152108	0.348869	0.348869	678.536	641.615	494.923	581.984	671.405	594.482	862.31	789.887	709.356	585.982	658.589	790.274
ABCB10P1	4.45905	0.0981924	0.130573	0.752008	0.452046	NA	1	1.37634	0.888663	6.00816	0	0.792686	10.3089	0	0	0.895652	21.703	8.72946	2.80571
ABCB10P3	0.27889	0.0427829	0.0580207	0.737374	0.460895	NA	1	0	0	0	0	0	0	0	0	0	2.41145	0	0.935235
ABCB10P4	1.60523	0.22151	0.123898	1.78785	0.0738005	NA	1	0	0.888663	3.00408	0	0	0.859079	0	1.32531	0	8.44007	1.93988	2.80571
ABCB11	2.22358	0.118024	0.103956	1.13533	0.256237	NA	1	0	1.77733	6.00816	0	0	0.859079	0	0	0.895652	13.263	3.87976	0
LEF1	6969.29	-1.01244	0.0505787	-20.0171	3.90796e-89	8.08947e-86	8.08947e-86	8687.47	9056.37	8620.96	9835.12	10305.7	10061.5	4119.19	5026.91	4284.8	5038.72	3786.65	4808.04
ABCB5	1.45234	0.133337	0.0909835	1.46551	0.142782	NA	1	0	0.888663	0.751021	0	0	0	0	0	1.7913	12.0572	1.93988	0
ABCB6	14.2474	0.00294258	0.254412	0.0115662	0.990772	NA	1	15.1398	11.5526	23.2816	14.3954	15.8537	11.168	11.0553	11.9278	11.6435	14.4687	15.519	14.9638
PLXDC2	1100.87	1.79955	0.0917517	19.6133	1.19088e-85	2.15698e-82	2.15698e-82	425.29	449.664	446.857	581.984	522.38	500.843	1450.45	1862.06	1469.76	1779.65	1546.08	2175.36
ABCB8	531.685	0.183357	0.0915181	2.00351	0.0451226	0.149515	0.149515	502.365	520.757	500.18	481.216	516.831	443.285	630.15	555.306	570.53	536.547	570.325	552.724
ABCB9	238.318	-0.0877842	0.150102	-0.58483	0.558662	0.754286	0.754286	275.268	252.38	250.841	252.947	251.281	243.119	165.829	202.773	226.6	265.259	243.455	230.068
ABCC1	2073.08	-0.149974	0.0766617	-1.95631	0.0504291	0.161974	0.161974	2270.96	2220.77	2038.27	2424.59	2316.23	2028.28	1865.02	2037.01	1782.35	1917.1	1849.68	2126.72
ABCC10	331.095	-0.00696056	0.111212	-0.0625884	0.950094	0.977274	0.977274	339.956	343.913	330.449	285.851	330.55	295.523	405.728	300.846	344.826	302.637	387.976	304.887
ABCC11	9.82159	0.263366	0.183001	1.43915	0.150107	NA	1	4.12902	3.55465	26.2857	1.02824	1.58537	9.44986	3.31658	3.97594	2.68696	34.966	19.3988	7.48188
ABCC12	5.25338	0.198948	0.132429	1.5023	0.133019	NA	1	0	1.77733	17.2735	0	0.792686	3.43631	1.10553	1.32531	0.895652	32.5546	3.87976	0
ABCC2	34.3349	0.129439	0.244017	0.530451	0.595799	0.78145	0.78145	52.301	25.7712	40.5551	28.7907	33.2928	26.6314	43.1155	33.1328	34.0348	37.3775	25.2184	31.798
ABCC3	14.3693	0.100546	0.099114	1.01445	0.310369	NA	1	1.37634	11.5526	42.0572	0	0	8.59079	0	0	2.68696	81.9892	22.3086	1.87047
HSPA1A	336.158	2.46867	0.129692	19.0349	8.76147e-81	1.4106e-77	1.4106e-77	77.0751	72.8704	95.3796	92.5416	85.6101	105.667	604.723	609.644	531.122	578.748	581.964	598.551
SLFN13	372.051	-2.17633	0.117186	-18.5716	5.45754e-77	7.90798e-74	7.90798e-74	598.709	531.421	552.751	656.017	707.869	657.195	127.135	141.809	109.27	122.984	115.423	144.026
ABCC5-AS1	0.14318	-0.0205228	0.0580207	-0.353715	0.723552	NA	1	0	0	0	0	0	1.71816	0	0	0	0	0	0
ABCC6	13.0053	0.211826	0.144594	1.46497	0.142929	NA	1	0	9.77529	39.8041	1.02824	0.792686	8.59079	0	2.65063	1.7913	67.5206	20.3687	3.74094
ABCC8	19.3913	0.0977996	0.0952276	1.02701	0.304416	0.537467	0.537467	1.37634	9.77529	57.0776	0	0	11.168	0	0	5.37391	116.955	29.0982	1.87047
ABCC9	3.06423	0.133592	0.126199	1.05858	0.289792	NA	1	0	0.888663	11.2653	0	0	1.71816	0	1.32531	1.7913	12.0572	6.78958	0.935235
TIMP2	195.573	-3.46902	0.19114	-18.1491	1.30416e-73	1.71794e-70	1.71794e-70	356.472	362.575	384.523	377.364	358.294	416.653	4.4221	10.6025	10.7478	25.3202	17.4589	22.4456
ABCD1P2	2.84469	0.163126	0.129487	1.25979	0.207745	NA	1	0	2.66599	10.5143	1.02824	0.792686	0	0	0	1.7913	14.4687	1.93988	0.935235
ABCD1P3	0.68058	0	0.059026	0	1	NA	1	0	0	5.25714	0	0	0	0	0	0	0	2.90982	0
ABCD1P4	1.08891	0.0688746	0.0737244	0.934217	0.350192	NA	1	0	0.888663	3.00408	0	0	0	0	0	0	7.23435	1.93988	0
ABCD1P5	1.22309	0.0735305	0.0860084	0.854922	0.392594	NA	1	0	0.888663	3.7551	0	0	0.859079	0	0	0	7.23435	1.93988	0
ABCD2	19.4434	-0.554437	0.252494	-2.19584	0.0281031	0.104871	0.104871	28.9032	18.6619	27.0367	24.6778	27.744	26.6314	14.3718	15.9038	8.95652	10.8515	16.489	13.0933
ABCD3	859.838	0.101181	0.0961931	1.05186	0.292866	0.526374	0.526374	872.601	857.56	754.025	864.75	858.479	739.667	960.702	909.165	934.165	837.978	828.329	900.632
ABCD4	983.176	0.141772	0.101546	1.39613	0.162674	0.366529	0.366529	992.342	957.09	838.89	895.597	978.967	890.864	1165.22	1058.93	1104.34	992.311	908.834	1014.73
CDK2AP1	1233.18	-1.41419	0.077963	-18.1392	1.56319e-73	1.88755e-70	1.88755e-70	1640.6	1676.02	1680.78	1979.36	1753.42	1968.15	629.044	648.078	710.252	707.76	677.018	727.613
ENSG00000288730	247.092	2.41467	0.136718	17.6617	8.27204e-70	9.22014e-67	9.22014e-67	46.7956	49.7651	45.8123	81.231	91.1589	79.0352	355.979	530.125	365.426	530.519	311.351	477.905
PARVB	420.972	3.10212	0.178123	17.4157	6.27442e-68	6.49402e-65	6.49402e-65	158.279	144.852	148.702	32.9037	28.5367	32.645	1286.83	508.92	947.6	455.764	969.94	336.685
ABCF2P1	2.91627	0.300036	0.187249	1.60234	0.109081	NA	1	2.75268	2.66599	6.75918	1.02824	0.792686	1.71816	1.10553	1.32531	1.7913	8.44007	1.93988	4.67618
ABCF2P2	0.225647	0.0174606	0.0580207	0.300938	0.763461	NA	1	0	0	1.50204	0	0	0	0	0	0	1.20572	0	0
ABCF3	856.108	-0.00260176	0.0825607	-0.0315133	0.97486	0.988643	0.988643	908.385	885.997	804.343	865.778	860.064	838.461	839.094	929.045	893.861	819.892	813.78	814.59
ABCG1	7.6703	0.122556	0.126595	0.968098	0.332996	NA	1	0	3.55465	24.0327	0	1.58537	5.15447	0	0	2.68696	33.7603	19.3988	1.87047
ABCG2	2.79286	0.132984	0.131813	1.00889	0.313029	NA	1	1.37634	5.33198	3.7551	0	1.58537	1.71816	0	0	0	12.0572	5.81964	1.87047
ABCG4	8.36167	0.118354	0.126631	0.934637	0.349975	NA	1	0	6.22064	26.2857	0	0	8.59079	0	1.32531	2.68696	34.966	17.4589	2.80571
ABCG5	2.53335	0.107943	0.105563	1.02255	0.306522	NA	1	0	3.55465	6.00816	0	0	0.859079	0	0	0.895652	13.263	5.81964	0
ABCG8	7.32425	0.137916	0.117508	1.17367	0.240528	NA	1	1.37634	7.1093	21.7796	0	0	3.43631	0	0	1.7913	39.7889	12.6092	0
ABHD1	2.60084	0.087067	0.111909	0.778015	0.43656	NA	1	0	4.44332	2.25306	1.02824	0	0.859079	1.10553	0	0	10.8515	10.6693	0
APBB1IP	1535.72	1.59664	0.0919598	17.3624	1.58956e-67	1.53551e-64	1.53551e-64	568.429	676.273	624.849	786.604	867.199	882.274	2171.25	2913.04	2018.8	2447.62	1856.47	2615.85
ABHD11	362.531	0.194228	0.132556	1.46525	0.142852	0.334129	0.334129	298.666	354.577	368.751	307.444	340.062	408.921	311.758	417.474	353.783	419.592	382.156	387.187
ABHD12	773.441	-0.051641	0.0782549	-0.659908	0.509313	0.717656	0.717656	864.343	828.234	785.567	731.079	754.637	720.767	828.039	742.175	851.765	663.148	789.531	722.002
ABHD12B	2.43644	0.0741053	0.0791629	0.936112	0.349215	NA	1	0	0	6.75918	0	0	1.71816	0	0	0	16.8801	3.87976	0
ABHD13	472.732	0.140669	0.143935	0.97731	0.328416	0.561041	0.561041	561.547	446.998	388.278	418.494	472.441	396.894	569.346	511.571	454.991	414.769	530.557	506.897
ABHD14A	182.049	0.139246	0.149823	0.929407	0.352678	0.585296	0.585296	172.043	163.514	165.225	166.575	173.598	219.065	162.512	222.653	155.843	183.27	183.319	216.975
ABHD14A-ACY1	0.839467	0.0660498	0.104074	0.634643	0.525661	NA	1	0	1.77733	0.751021	1.02824	0	0.859079	1.10553	0	0	3.61717	0	0.935235
FAM30A	3128.12	-1.08159	0.0624506	-17.3191	3.37708e-67	3.05836e-64	3.05836e-64	4170.32	4104.73	3981.16	4750.47	4737.88	4680.26	1390.75	2090.02	1567.39	2131.72	1545.11	2387.66
ABHD15	629.673	0.130378	0.102596	1.27079	0.203804	0.422478	0.422478	630.364	658.499	536.229	635.452	581.832	582.455	612.461	637.476	717.417	658.325	626.581	678.981
ABHD15-AS1	1.78275	0.0817791	0.1295	0.631498	0.527715	NA	1	0	3.55465	5.25714	0	0	1.71816	1.10553	1.32531	0	3.61717	3.87976	0.935235
ABHD16A	59.0308	-0.096394	0.216889	-0.444439	0.656725	0.820907	0.820907	78.4515	71.9817	52.5714	50.3838	65.7929	56.6992	71.8592	51.6872	51.0522	49.4347	51.4068	57.0493
ABHD16B	3.46626	0.0586963	0.11941	0.491553	0.623035	NA	1	0	0	12.7673	0	1.58537	4.29539	1.10553	1.32531	0	10.8515	8.72946	0.935235
ABHD17A	1232.86	-0.0815125	0.0878432	-0.927932	0.353443	0.585837	0.585837	1284.13	1249.46	1118.27	1315.12	1471.23	1249.96	1133.16	1294.83	1075.68	1159.91	1090.21	1352.35
ABHD17AP1	8.62765	0.117519	0.248286	0.473321	0.635984	NA	1	11.0107	11.5526	12.0163	5.1412	9.51223	5.15447	7.73868	6.62657	8.95652	9.64579	7.75952	8.41712
ABHD17AP3	8.00347	0.0641932	0.225266	0.284966	0.77567	NA	1	1.37634	12.4413	10.5143	8.22592	6.34149	8.59079	3.31658	5.30125	5.37391	14.4687	12.6092	7.48188
ABHD17AP4	3.10375	0.123698	0.130812	0.945618	0.344343	NA	1	2.75268	1.77733	12.7673	1.02824	0.792686	1.71816	0	0	0	14.4687	1.93988	0
ABHD17AP5	2.57148	0.167597	0.136164	1.23084	0.218382	NA	1	0	1.77733	7.51021	1.02824	0	0.859079	0	0	2.68696	8.44007	3.87976	4.67618
ABHD17AP6	9.81518	0.170119	0.230431	0.738264	0.460354	NA	1	2.75268	7.99797	21.0286	7.19768	5.5488	8.59079	5.52763	10.6025	13.4348	16.8801	12.6092	5.61141
ABHD17AP8	0.871855	0.0667146	0.0724138	0.921296	0.356896	NA	1	0	0	0	0	0	0.859079	0	0	0	4.8229	2.90982	1.87047
ABHD17B	798.993	-0.09906	0.121757	-0.813591	0.415879	0.642577	0.642577	834.063	870.89	745.012	836.988	829.15	696.713	965.124	799.164	896.548	676.411	716.786	721.066
ABHD17C	281.49	0.00884017	0.127727	0.0692113	0.944821	0.974826	0.974826	249.118	266.599	275.625	229.298	225.123	262.019	415.678	227.954	370.8	220.648	365.667	269.348
PCDHGA12	242.599	-2.75967	0.159894	-17.2594	9.51258e-67	8.10808e-64	8.10808e-64	432.171	460.327	419.82	444.2	455.794	408.062	45.3266	54.3378	49.2609	62.6977	43.6473	35.5389
ABHD2	1092.67	-0.0385178	0.102958	-0.374112	0.708321	0.854033	0.854033	1150.62	1046.85	1020.64	1130.04	1127.99	1069.55	1004.92	931.695	1095.38	1099.62	1235.7	1198.97
ABHD3	345.955	0.190418	0.175016	1.088	0.276594	0.50932	0.50932	372.989	321.696	255.347	367.082	329.757	292.946	412.361	482.414	321.539	295.402	323.96	375.965
PDGFRB	1492.97	-1.44822	0.0841152	-17.2171	1.97532e-66	1.59013e-63	1.59013e-63	1864.94	1872.41	1701.06	2704.27	2626.17	2498.2	600.301	872.056	588.443	880.179	677.018	1030.63
ABHD5	205.646	0.241105	0.141645	1.70218	0.0887224	0.242426	0.242426	181.677	198.172	191.51	178.914	195.001	170.957	233.266	206.749	211.374	195.327	255.094	249.708
SAMHD1	3168.15	-0.864216	0.0502879	-17.1854	3.41813e-66	2.60678e-63	2.60678e-63	3586.75	3891.46	3592.88	4153.06	4244.83	4054.85	2567.03	2292.79	2625.16	2207.68	2502.45	2298.81
ABHD8	54.0029	-0.151648	0.254272	-0.596401	0.550908	0.749013	0.749013	60.559	71.9817	80.3592	45.2426	57.8661	45.5312	24.3216	14.5784	77.0261	49.4347	65.9559	55.1789
ARMCX6	99.9446	3.82559	0.229991	16.6337	3.97263e-62	2.87817e-59	2.87817e-59	0	0.888663	6.75918	2.05648	0.792686	1.71816	207.839	198.797	214.956	206.179	162.95	196.399
ABI1P1	0.158765	0.0174606	0.0580207	0.300938	0.763461	NA	1	0	0	0	0	0	0	0	0	0	0	0.96994	0.935235
ETS1	995.128	1.76811	0.107447	16.4556	7.64094e-61	5.27225e-58	5.27225e-58	767.999	758.03	637.616	297.161	333.721	282.637	1922.51	1245.79	1835.19	1009.19	1781.78	1069.91
SHANK1	1927.21	-1.35189	0.0827589	-16.3353	5.53201e-60	3.64358e-57	3.64358e-57	2551.74	2598.45	2726.96	2880.1	2905.99	3394.22	781.607	1219.29	901.922	1096	879.736	1190.55
ABI3BP	8.14633	0.0767952	0.190982	0.402106	0.687606	NA	1	6.88171	0.888663	13.5184	8.22592	6.34149	10.3089	2.21105	2.65063	3.58261	27.7317	12.6092	2.80571
ABITRAM	279.286	-0.105615	0.128067	-0.824689	0.409548	0.638583	0.638583	284.903	295.925	255.347	305.387	288.538	254.287	292.964	280.966	269.591	264.054	319.11	240.355
ABITRAMP1	0.301431	0.0427829	0.0580207	0.737374	0.460895	NA	1	0	0	0	0	0	0	0	0	0	3.61717	0	0
GSDME	778.156	2.62847	0.162546	16.1706	8.12488e-59	5.11868e-56	5.11868e-56	301.419	324.362	281.633	55.525	41.2197	42.9539	2685.32	424.1	1900.57	329.163	2509.23	442.366
ABL2	962.216	0.168226	0.102184	1.6463	0.0997012	0.26298	0.26298	992.342	890.44	940.278	1021.04	879.881	846.192	965.124	1123.87	892.069	907.91	1019.41	1068.04
MEX3A	435.132	-1.98553	0.123597	-16.0645	4.52585e-58	2.73248e-55	2.73248e-55	606.967	605.18	696.947	699.203	713.417	847.051	179.095	189.52	186.296	162.773	165.86	169.278
ABLIM2	10.2345	0.130789	0.122948	1.06377	0.287433	NA	1	0	7.1093	27.7878	1.02824	2.37806	8.59079	0	0	1.7913	56.669	17.4589	0
ABLIM3	10.4917	0.305086	0.205121	1.48735	0.136923	NA	1	8.25805	14.2186	13.5184	3.08472	0.792686	6.87263	7.73868	2.65063	8.95652	33.7603	22.3086	3.74094
ABO	5.63739	0.0603261	0.101982	0.591534	0.554163	NA	1	0	0	17.2735	0	0	8.59079	0	0	1.7913	21.703	14.5491	3.74094
CDH11	123.696	-3.52602	0.220543	-15.9879	1.55235e-57	8.9974e-55	8.9974e-55	273.892	283.484	269.616	232.382	214.818	190.715	0	0	0	10.8515	4.8497	3.74094
ABRA	0.793933	0.0293027	0.0702987	0.416831	0.676802	NA	1	0	0.888663	5.25714	0	0	0	0	0	0	2.41145	0.96994	0
ABRACL	1384.58	0.207163	0.107462	1.92777	0.0538837	0.1704	0.1704	1263.48	1187.25	1088.98	1358.31	1427.63	1237.93	1535.58	1627.48	1632.77	1568.65	1202.73	1484.22
ABR-AS1	1.61011	0.13421	0.140456	0.955528	0.339311	NA	1	2.75268	2.66599	0	2.05648	0.792686	0.859079	0	1.32531	0	6.02862	0.96994	1.87047
FRMD4B	502.898	-2.68904	0.170101	-15.8084	2.72127e-56	1.51658e-53	1.51658e-53	759.741	806.017	756.278	1034.41	1024.15	977.631	84.02	79.5188	99.4174	120.572	138.701	154.314
ABRAXAS2	707.391	0.07603	0.0877956	0.865989	0.386496	0.61804	0.61804	684.042	681.605	594.808	756.785	707.869	675.236	683.215	755.429	758.617	752.372	688.657	750.059
ABT1	769.479	0.0621139	0.0798903	0.777489	0.43687	0.659882	0.659882	751.483	745.588	714.972	768.095	772.869	792.07	747.336	856.152	803.4	763.223	698.357	820.201
ABT1P1	0.288232	0.0174606	0.0580207	0.300938	0.763461	NA	1	0	0	2.25306	0	0	0	0	0	0	1.20572	0	0
ABTB1	403.727	0.195246	0.132242	1.47642	0.139831	0.329632	0.329632	357.849	359.909	337.959	397.929	341.648	307.55	549.446	477.113	509.626	359.306	470.421	375.965
ABTB2	32.3871	-0.143729	0.251734	-0.570957	0.568029	0.761029	0.761029	41.2902	53.3198	66.0898	21.593	28.5367	33.5041	28.7437	6.62657	17.0174	45.8175	33.9479	12.1581
TBC1D1	5030.91	-0.901175	0.0573063	-15.7256	1.00983e-55	5.41941e-53	5.41941e-53	6855.56	7047.99	6438.5	5756.09	5773.92	5293.64	4699.59	2979.3	4734.42	2817.78	4843.88	3130.23
ACAA1	1113.37	-0.0906085	0.0802376	-1.12925	0.258791	0.489796	0.489796	1174.02	1306.33	1133.29	972.715	1090.74	1046.36	1276.88	963.503	1282.57	976.637	1160.05	977.321
ACAA2	1594.54	0.124855	0.0858261	1.45474	0.145742	0.338429	0.338429	1538.75	1637.81	1426.19	1580.41	1598.85	1527.44	1648.34	1843.51	1644.42	1695.25	1382.16	1611.41
ACAA2P1	14.5795	0.34447	0.254516	1.35343	0.175918	NA	1	15.1398	13.3299	9.76327	8.22592	15.061	10.3089	13.2663	17.2291	18.8087	20.4973	16.489	16.8342
ACACA	3830.07	-0.00999966	0.0777306	-0.128645	0.897638	0.953721	0.953721	3995.52	3575.09	3523.04	4579.78	4233.74	3708.64	3231.45	4227.75	3425.87	3964.42	3258.03	4237.55
SLC12A7	1540.46	-1.15789	0.0738289	-15.6834	1.96568e-55	1.01724e-52	1.01724e-52	2170.49	2176.34	2045.03	2373.18	2254.4	2207.83	731.858	955.551	816.835	974.225	705.146	1074.59
ACAD10	457.73	0.183872	0.105802	1.73789	0.0822294	0.229931	0.229931	406.021	459.439	395.037	383.534	397.136	457.889	556.08	490.366	515.896	459.381	504.369	467.618
ACAD11	17.1535	0.52826	0.253518	2.08371	0.0371863	0.129464	0.129464	16.5161	17.7733	15.0204	13.3671	11.0976	6.87263	21.005	21.205	24.1826	21.703	17.4589	19.6399
ACAD8	453.467	-0.0343256	0.128887	-0.266324	0.78999	0.90053	0.90053	451.44	446.998	428.833	488.414	514.453	389.163	457.688	457.233	509.626	409.946	399.615	488.193
BAZ1B	7885.48	-0.826635	0.0528967	-15.6274	4.7408e-55	2.36877e-52	2.36877e-52	10204.2	10356.5	9745.24	10437.7	10052.1	10155.2	5572.96	6027.52	5371.23	5261.78	5562.61	5878.89
ACAD9-DT	63.8665	-0.0784323	0.215766	-0.363506	0.716227	0.85843	0.85843	67.4407	63.0951	80.3592	80.2027	47.5612	68.7263	58.5929	70.2416	58.2174	48.229	60.1363	63.596
ACADL	2.34571	0.0573352	0.0986741	0.581056	0.561203	NA	1	0	0	4.50612	0	0	3.43631	0	0	0.895652	9.64579	8.72946	0.935235
ACADM	2752.76	-0.00670365	0.051625	-0.129853	0.896683	0.953268	0.953268	2598.53	2587.79	2535.45	2926.37	2936.9	2905.4	2528.34	2801.71	2766.67	3015.52	2521.84	2908.58
ACADS	153.854	-0.0821348	0.164224	-0.500139	0.616977	0.795448	0.795448	155.527	184.842	172.735	152.18	159.33	132.298	156.985	124.579	185.4	148.304	131.912	142.156
ACADSB	365.811	-0.111497	0.105442	-1.05742	0.29032	0.523782	0.523782	385.376	358.131	335.706	420.55	397.136	354.799	359.296	352.533	355.574	365.334	343.359	361.936
NXN	478.219	-1.88829	0.1211	-15.5928	8.14546e-55	3.93426e-52	3.93426e-52	750.106	836.232	728.49	781.463	820.43	725.921	140.402	194.821	181.817	185.682	195.928	197.335
ACAN	8.09129	0.191765	0.1467	1.30719	0.191148	NA	1	1.37634	5.33198	29.2898	0	0	6.87263	0	1.32531	5.37391	31.3488	7.75952	8.41712
PI4K2A	123.877	-3.51312	0.230184	-15.2622	1.36503e-52	6.38043e-50	6.38043e-50	246.365	219.5	250.09	251.919	233.05	264.596	0	0	2.68696	14.4687	2.90982	0.935235
ARHGAP32	1316.58	-1.82266	0.119475	-15.2556	1.51151e-52	6.84429e-50	6.84429e-50	2122.32	2031.48	2089.34	2192.21	2055.43	2010.24	456.582	550.005	549.93	461.792	659.559	620.061
ACAP2-IT1	7.69268	-0.19871	0.238605	-0.832799	0.404958	NA	1	6.88171	5.33198	10.5143	4.11296	7.92686	6.01355	17.6884	2.65063	13.4348	2.41145	10.6693	4.67618
ACAP3	1109.4	-0.155388	0.0791458	-1.96332	0.0496095	0.15992	0.15992	1230.45	1076.17	1090.48	1149.57	1273.05	1196.7	1067.94	1097.36	1040.75	1051.39	944.722	1094.23
ACAT1	1605.68	-0.0662744	0.082771	-0.800696	0.423307	0.648934	0.648934	1512.6	1578.27	1476.51	1832.32	1800.19	1555.79	1674.87	1664.59	1495.74	1633.76	1393.8	1649.75
PAN3-AS1	1465.15	-1.4182	0.0934651	-15.1736	5.29312e-52	2.32416e-49	2.32416e-49	2233.8	2121.24	2128.39	2014.32	1918.3	2052.34	918.692	771.332	953.869	608.891	1083.42	777.18
ACBD3	1748.38	-0.00560115	0.0777818	-0.072011	0.942593	0.973567	0.973567	1566.28	1620.03	1565.13	2040.03	1984.09	1907.15	1541.1	2103.27	1398.11	1729.01	1452.97	2073.42
ACBD3-AS1	1.03846	0.0868829	0.129835	0.669179	0.503381	NA	1	1.37634	0.888663	3.00408	1.02824	0.792686	0	0	1.32531	0	1.20572	0.96994	1.87047
SH3KBP1	2145.85	0.997901	0.0660964	15.0977	1.67777e-51	7.15026e-49	7.15026e-49	1308.9	1347.21	1322.55	1699.68	1533.85	1676.92	2232.06	3276.17	2493.5	3448.37	2215.34	3195.7
ACBD5	497.592	0.208691	0.112563	1.85399	0.06374	0.192157	0.192157	407.397	440.777	416.816	476.075	485.917	445.003	626.833	584.463	555.304	552.222	475.271	505.027
PLEK	373.21	1.98674	0.132348	15.0115	6.17567e-51	2.55673e-48	2.55673e-48	125.247	103.085	97.6327	196.394	175.184	177.829	362.613	815.068	474.696	796.984	357.908	795.885
PAN3	38164.2	1.44341	0.0964593	14.9639	1.26321e-50	5.0844e-48	5.0844e-48	21404.9	19428	17867.5	21343.2	20524.2	17838.8	62895.6	62088.3	53521.5	49112.8	54352.5	57592.7
ACCS	791.813	0.243229	0.121902	1.99528	0.0460128	0.151494	0.151494	823.052	654.056	678.923	598.436	678.539	651.182	1196.18	813.742	1002.23	688.469	910.774	806.173
ACCSL	2.35893	0.0321961	0.0780942	0.412272	0.68014	NA	1	0	0	10.5143	0	0	0.859079	0	0	0	7.23435	9.6994	0
ACD	731.822	-0.147299	0.107138	-1.37485	0.169177	0.375812	0.375812	659.268	747.366	815.608	769.124	830.735	826.434	570.451	777.959	725.478	692.086	654.709	712.649
ACE	9.67113	0.178449	0.139723	1.27716	0.201544	NA	1	0	7.1093	22.5306	0	0	10.3089	1.10553	2.65063	1.7913	44.6118	19.3988	6.54665
ACE2	1.15642	0.131549	0.0898122	1.46471	0.143	NA	1	0	0.888663	2.25306	0	0	0	0	1.32531	0	8.44007	0.96994	0
ACE3P	0.263539	0.0301218	0.0580207	0.519156	0.603652	NA	1	0	0	0.751021	0	0	0	0	0	0	2.41145	0	0
ACER1	4.17139	0.0973669	0.130232	0.74764	0.454677	NA	1	1.37634	1.77733	15.0204	3.08472	0	0.859079	0	0	0.895652	14.4687	11.6393	0.935235
ACER2	35.6778	-0.100731	0.229584	-0.438755	0.660839	0.822996	0.822996	33.0322	31.1032	33.0449	38.0449	42.0124	31.7859	35.3768	34.4581	47.4696	31.3488	34.9178	35.5389
ACER2P1	0.790617	0.0611381	0.059452	1.02836	0.30378	NA	1	0	0	2.25306	0	0	0	0	0	0	7.23435	0	0
ACER3	696.72	-0.0125247	0.107478	-0.116533	0.90723	0.958373	0.958373	795.525	711.819	674.416	586.097	591.344	499.984	872.26	512.896	951.182	546.193	1020.38	598.551
ACHE	7.45307	0.118481	0.143084	0.828051	0.407641	NA	1	0	3.55465	27.7878	1.02824	0.792686	6.87263	0	1.32531	1.7913	24.1145	18.4289	3.74094
ACIN1	7202.5	-0.0225079	0.0474193	-0.474656	0.635032	0.80801	0.80801	7128.07	7397.23	7169.24	7252.18	7141.31	7519.51	7089.74	7595.37	7310.31	6876.25	6845.84	7104.98
ACKR1	1.80199	0.0966487	0.0825911	1.17021	0.241918	NA	1	0	2.66599	3.7551	0	0	0	0	0	0	13.263	1.93988	0
LPXN	430.45	1.91299	0.129893	14.7274	4.30077e-49	1.68428e-46	1.68428e-46	184.43	138.631	137.437	188.168	221.159	167.52	609.145	841.574	584.861	749.96	535.407	807.108
ACKR3	2.53733	0.128794	0.137102	0.939401	0.347525	NA	1	0	1.77733	4.50612	1.02824	1.58537	2.57724	0	0	0.895652	13.263	3.87976	0.935235
ACKR4	8.30005	0.373669	0.224456	1.66478	0.0959575	NA	1	2.75268	0.888663	4.50612	2.05648	5.5488	4.29539	28.7437	14.5784	10.7478	8.44007	5.81964	11.2228
ACLY	10464.9	-0.0331715	0.078372	-0.423257	0.672108	0.829897	0.829897	10381.7	10539.5	9207.51	12082.9	12071.8	10693	9246.62	11967.6	9102.51	10277.6	8218.3	11789.6
ACMSD	1.21192	0.119234	0.0903601	1.31954	0.186987	NA	1	0	1.77733	0.751021	0	0	0	0	0	0	7.23435	2.90982	1.87047
ACNATP	1.39739	0.0610151	0.0881257	0.692364	0.488709	NA	1	0	1.77733	3.00408	0	0	2.57724	0	0	0	8.44007	0.96994	0
ACO1	560.185	0.00214491	0.123858	0.0173175	0.986183	0.993715	0.993715	601.461	576.742	538.482	549.08	601.649	554.106	531.758	564.583	495.296	465.41	569.355	674.305
ACO2	2801.3	-0.0274172	0.0872286	-0.314314	0.753282	0.881354	0.881354	2831.13	2844.61	2489.63	3010.69	3105.74	2936.33	2582.51	3042.92	2781	2843.1	2156.18	2991.82
ACOD1	0.889366	0.0460603	0.0599272	0.768605	0.442128	NA	1	0	0.888663	3.7551	0	0	0	0	0	0	6.02862	0	0
ACOT1	14.2241	-0.154877	0.250073	-0.619326	0.535702	NA	1	4.12902	10.664	17.2735	22.6213	21.4025	13.7453	9.94973	14.5784	14.3304	22.9088	10.6693	8.41712
ACOT11	54.8098	0.0742668	0.253968	0.292425	0.769961	0.890047	0.890047	85.3332	51.5425	78.1061	40.1014	45.1831	60.9946	26.5326	22.5303	43.8869	88.0179	64.986	50.5027
ACOT12	1.82608	0.164004	0.131136	1.25064	0.211067	NA	1	0	0.888663	3.7551	0	0	1.71816	2.21105	1.32531	0	7.23435	2.90982	1.87047
ACOT13	715.382	-0.0301961	0.115075	-0.262404	0.79301	0.90204	0.90204	649.633	699.378	746.514	649.848	664.271	828.152	656.682	674.584	822.209	719.817	772.072	701.426
ACOT2	152.86	-0.0352017	0.149548	-0.235387	0.813908	0.913537	0.913537	140.387	146.629	169.731	152.18	180.732	160.648	142.613	169.64	138.826	155.538	120.273	157.12
ACOT4	0.507429	0.0413592	0.0582691	0.709796	0.477831	NA	1	0	0	1.50204	0	0	0	0	0	0	3.61717	0.96994	0
ACOT6	2.09408	0.00144006	0.103169	0.0139582	0.988863	NA	1	0	0	0.751021	0	2.37806	3.43631	0	0	0.895652	6.02862	11.6393	0
CBLB	694.698	-1.5839	0.107913	-14.6776	8.96951e-49	3.42021e-46	3.42021e-46	747.354	819.347	734.498	1312.03	1194.58	1194.12	381.406	418.799	366.322	324.34	418.044	425.532
ACOT8	285.922	-0.114176	0.116976	-0.976065	0.329032	0.561497	0.561497	305.548	277.263	303.412	319.783	272.684	293.805	268.643	275.665	305.417	260.436	271.583	276.83
ACOT9	5.69424	0.236685	0.171112	1.38322	0.166597	NA	1	1.37634	2.66599	17.2735	1.02824	0.792686	6.01355	1.10553	3.97594	0.895652	21.703	7.75952	3.74094
ACOX1	900.743	-0.114726	0.0907481	-1.26422	0.206151	0.425516	0.425516	1018.49	1043.29	910.988	988.139	890.186	824.715	829.144	809.766	936.852	845.213	880.705	831.424
ACOX2	2.58216	0.128219	0.0996194	1.28709	0.198063	NA	1	1.37634	1.77733	9.01225	0	0	0	0	0	0	16.8801	1.93988	0
ACOX3	127.649	0.0164255	0.154101	0.106589	0.915115	0.961428	0.961428	118.365	120.858	142.694	129.558	121.281	128.003	120.502	121.929	133.452	135.041	133.852	126.257
FGFBP2	184.406	-2.52568	0.172697	-14.6249	1.94899e-48	7.24126e-46	7.24126e-46	278.021	320.807	349.225	296.133	271.891	298.959	80.7034	41.0847	105.687	30.1431	102.814	37.4094
ACOXL-AS1	6.1778	0.376927	0.221115	1.70466	0.088257	NA	1	11.0107	4.44332	9.01225	2.05648	0.792686	1.71816	11.0553	5.30125	8.06087	12.0572	5.81964	2.80571
MYO1F	1371.06	1.2326	0.0856813	14.3858	6.35255e-47	2.30121e-44	2.30121e-44	704.687	636.283	618.841	916.162	917.93	856.501	1937.99	2280.86	1751	1993.06	1629.5	2209.96
TFCP2	971.193	1.15439	0.0802894	14.3779	7.12489e-47	2.51804e-44	2.51804e-44	517.504	552.748	469.388	619.001	635.734	606.509	1416.18	1403.51	1362.29	1391.41	1245.4	1434.65
ACP3	5.03034	-0.430284	0.173183	-2.48456	0.0129712	NA	1	0	1.77733	9.76327	10.2824	16.6464	13.7453	1.10553	1.32531	0.895652	4.8229	0	0
ACP4	4.07746	0.13968	0.138076	1.01162	0.311719	NA	1	0	1.77733	10.5143	1.02824	1.58537	2.57724	0	0	1.7913	18.0859	9.6994	1.87047
ACP5	5.75611	0.102415	0.116203	0.881346	0.378131	NA	1	0	1.77733	12.7673	0	0	11.168	0	0	2.68696	30.1431	6.78958	3.74094
ACP6	227.546	0.0450119	0.143392	0.313908	0.753591	0.881387	0.881387	240.86	225.72	246.335	203.592	145.854	179.547	326.13	186.869	288.4	184.476	328.81	173.954
ACP7	5.12943	0.154271	0.130402	1.18304	0.236791	NA	1	1.37634	0.888663	17.2735	0	0.792686	3.43631	0	0	0.895652	25.3202	9.6994	1.87047
ACR	2.95366	0.0431902	0.0998884	0.432385	0.665461	NA	1	0	0.888663	12.7673	0	0	4.29539	0	0	1.7913	10.8515	4.8497	0
SLC9A7	317.109	2.18987	0.152481	14.3616	9.01307e-47	3.10951e-44	3.10951e-44	101.849	71.9817	90.1225	120.304	104.635	97.935	545.024	584.463	447.826	491.935	491.76	657.47
ACRP1	0.826613	0.0554828	0.09285	0.597554	0.550138	NA	1	0	0	1.50204	0	0	0.859079	1.10553	0	0.895652	3.61717	1.93988	0
ACRV1	2.89937	0.152709	0.178934	0.853441	0.393415	NA	1	4.12902	4.44332	3.00408	1.02824	3.17074	0.859079	2.21105	0	1.7913	8.44007	2.90982	2.80571
ACSBG1	14.2305	0.413171	0.228834	1.80555	0.070989	NA	1	6.88171	9.77529	33.7959	6.16944	9.51223	8.59079	9.94973	11.9278	4.47826	45.8175	13.5792	10.2876
ACSBG2	3.90534	0.171562	0.161123	1.06478	0.286974	NA	1	1.37634	3.55465	13.5184	1.02824	0.792686	5.15447	0	5.30125	0	13.263	1.93988	0.935235
ACSF2	508.208	0.0612929	0.114846	0.533695	0.593552	0.77994	0.77994	428.042	437.222	390.531	563.476	532.685	494.829	596.984	616.271	480.965	495.553	509.218	552.724
ACSF3	981.336	0.0871154	0.0684063	1.2735	0.20284	0.421179	0.421179	977.203	952.647	899.723	920.275	960.735	965.604	1080.1	1019.17	1005.82	1015.22	983.519	996.026
ACSL1	849.371	0.129618	0.137748	0.940977	0.346716	0.58006	0.58006	854.708	856.671	732.996	759.87	791.893	632.282	1244.82	902.538	939.539	660.737	971.88	844.517
CYSLTR1	251.458	2.07917	0.145157	14.3236	1.55738e-46	5.24802e-44	5.24802e-44	52.301	58.6518	60.0816	101.796	95.915	111.68	391.356	555.306	346.617	464.204	302.621	476.97
ACSL3-AS1	0.143413	0	0.0580207	0	1	NA	1	0	0	0.751021	0	0	0	0	0	0	0	0.96994	0
ACSL4	2276.19	0.0860471	0.089047	0.966311	0.333889	0.565787	0.565787	2273.72	2067.92	1921.11	2414.31	2324.16	1986.19	2454.27	2377.61	2438.86	2206.48	2287.12	2562.54
CLMN	1138.54	-1.16696	0.082623	-14.1239	2.70548e-45	8.90963e-43	8.90963e-43	1474.06	1511.62	1531.33	1260.62	1258.79	1213.88	1166.33	494.342	1244.96	551.016	1383.13	572.364
ACSL6	9.70899	0.275449	0.148447	1.85554	0.0635193	NA	1	1.37634	2.66599	20.2776	1.02824	0.792686	4.29539	0	2.65063	0.895652	60.2862	20.3687	1.87047
ACSL6-AS1	0.492827	0.00677318	0.061314	0.110467	0.912039	NA	1	0	0.888663	0	0	0	1.71816	0	0	0.895652	2.41145	0	0
ACSM1	2.16547	0.0555773	0.115877	0.479623	0.631496	NA	1	0	2.66599	9.76327	0	0	2.57724	1.10553	0	0	6.02862	2.90982	0.935235
ACSM2A	1.79756	0.100328	0.102455	0.979241	0.327461	NA	1	0	0.888663	4.50612	0	0	0.859079	0	0	1.7913	9.64579	3.87976	0
ACSM2B	2.45353	0.0796137	0.089349	0.891042	0.372907	NA	1	0	0	7.51021	0	0	1.71816	0	0	0.895652	14.4687	4.8497	0
PTPRB	196.527	-3.25124	0.230662	-14.0952	4.06306e-45	1.3083e-42	1.3083e-42	396.386	378.57	371.004	394.844	405.063	348.786	2.21105	5.30125	3.58261	14.4687	19.3988	18.7047
ACSM4	2.15519	0.172412	0.10984	1.56966	0.116495	NA	1	0	0.888663	7.51021	0	0	0	0	1.32531	0	13.263	1.93988	0.935235
ACSM5	1.65614	0.084164	0.0905783	0.929185	0.352793	NA	1	0	0.888663	7.51021	0	0	0.859079	0	0	0	9.64579	0.96994	0
ACSM5P1	1.57529	0.0606209	0.076676	0.790611	0.429171	NA	1	0	0.888663	3.7551	0	0	0	0	0	0	8.44007	5.81964	0
ACSM6	1.25511	0.0667199	0.0605358	1.10216	0.270394	NA	1	0	0	3.00408	0	0	0	0	0	0	12.0572	0	0
SUCLG2	1202.28	1.05079	0.0747863	14.0506	7.64233e-45	2.40733e-42	2.40733e-42	728.085	757.141	699.951	703.316	750.674	659.772	1844.02	1448.57	1885.35	1420.34	1949.58	1580.55
ACSS2	440.195	-0.0454815	0.135522	-0.335603	0.73717	0.870826	0.870826	419.784	454.995	440.849	481.216	466.099	398.612	396.884	376.389	423.643	405.123	504.369	514.379
ACSS3	6.59203	0.0579348	0.142277	0.407199	0.683862	NA	1	0	7.1093	21.0286	2.05648	0.792686	8.59079	0	0	2.68696	15.6744	16.489	4.67618
ACTA1	16.5271	-0.127624	0.2539	-0.502656	0.615206	0.794717	0.794717	16.5161	26.6599	21.0286	19.5366	15.061	15.4634	12.1608	11.9278	12.5391	16.8801	17.4589	13.0933
ACTA2	3.69235	0.196645	0.167677	1.17276	0.240891	NA	1	0	1.77733	6.75918	1.02824	0.792686	3.43631	1.10553	1.32531	7.16522	13.263	4.8497	2.80571
ACTA2-AS1	4.02836	-0.174951	0.199815	-0.875566	0.381266	NA	1	4.12902	0.888663	8.26123	6.16944	3.17074	6.01355	6.63316	1.32531	2.68696	2.41145	2.90982	3.74094
MYH10	1325.53	-1.31431	0.093817	-14.0093	1.36684e-44	4.21394e-42	4.21394e-42	1899.35	1815.54	1890.32	1992.73	1909.58	1840.15	834.672	744.826	651.139	700.526	841.908	785.598
ACTBL2	0.790617	0.0611381	0.059452	1.02836	0.30378	NA	1	0	0	2.25306	0	0	0	0	0	0	7.23435	0	0
ACTBP1	0.689035	0.111267	0.0824777	1.34906	0.177318	NA	1	0	0.888663	1.50204	0	0	0	0	1.32531	0	3.61717	0	0.935235
ACTBP11	1.92895	0.194058	0.133325	1.45553	0.145524	NA	1	1.37634	1.77733	8.26123	0	0.792686	0	0	3.97594	0	6.02862	0	0.935235
ACTBP12	0.522781	0.0626352	0.0634227	0.987583	0.323357	NA	1	0	0	0.751021	0	0	0	0	0	0	3.61717	0.96994	0.935235
ACTBP14	1.18305	0.0572369	0.0991848	0.577074	0.56389	NA	1	0	0.888663	5.25714	0	0	0.859079	0	0	0	2.41145	2.90982	1.87047
ACTBP15	1.28556	0.0830441	0.0870962	0.953476	0.340349	NA	1	0	2.66599	0.751021	0	0	0	0	0	0.895652	7.23435	3.87976	0
ACTBP2	31.3555	-0.255976	0.244994	-1.04483	0.296103	0.5295	0.5295	41.2902	33.7692	36.049	47.2991	30.9148	24.0542	27.6381	25.181	35.8261	22.9088	23.2786	28.0571
ACTBP4	3.21766	0.223531	0.173733	1.28664	0.198221	NA	1	0	2.66599	9.01225	0	2.37806	1.71816	2.21105	2.65063	1.7913	4.8229	3.87976	7.48188
ACTBP6	0.685379	0.0718877	0.0589758	1.21894	0.222868	NA	1	0	0	0.751021	0	0	0	0	2.65063	0	4.8229	0	0
ACTBP7	1.49025	0.127333	0.148433	0.85785	0.390975	NA	1	1.37634	1.77733	5.25714	0	0	0.859079	1.10553	1.32531	0.895652	2.41145	1.93988	0.935235
ACTBP8	4.29203	-0.0920418	0.16884	-0.545144	0.585655	NA	1	9.63439	5.33198	9.76327	12.3389	1.58537	0.859079	0	2.65063	3.58261	4.8229	0	0.935235
ACTBP9	3.34196	0.00704203	0.194318	0.0362396	0.971091	NA	1	4.12902	0.888663	8.26123	3.08472	2.37806	3.43631	2.21105	2.65063	1.7913	3.61717	4.8497	2.80571
ACTC1	1.53615	0.106505	0.111521	0.955018	0.339568	NA	1	0	0.888663	4.50612	0	0	1.71816	0	1.32531	1.7913	7.23435	0.96994	0
ACTE1P	3.11763	0.128564	0.114939	1.11854	0.263338	NA	1	0	1.77733	8.26123	0	0	1.71816	0	1.32531	0.895652	15.6744	7.75952	0
ACTG1	76905.6	-0.100939	0.0597688	-1.68882	0.0912541	0.247215	0.247215	76768.2	80871	69918.5	80551.3	83443.7	77168.4	78816.3	77548	77825	70993	72859.9	76103.8
ACTG1P1	5.84186	0.0274029	0.193176	0.141854	0.887195	NA	1	4.12902	7.99797	0	11.3106	3.17074	7.73171	2.21105	5.30125	7.16522	14.4687	1.93988	4.67618
ACTG1P10	2.99114	0.0902402	0.177781	0.507593	0.611739	NA	1	2.75268	1.77733	6.75918	4.11296	1.58537	1.71816	2.21105	0	1.7913	8.44007	1.93988	2.80571
ACTG1P11	4.39133	-0.0633148	0.188782	-0.335386	0.737334	NA	1	6.88171	10.664	4.50612	8.22592	4.75612	0	4.4221	5.30125	2.68696	2.41145	0.96994	1.87047
ACTG1P12	1.4867	0.0898405	0.0964693	0.931286	0.351706	NA	1	0	3.55465	5.25714	0	0	0.859079	0	0	0	7.23435	0	0.935235
ACTG1P14	15.8416	0.171276	0.254428	0.67318	0.500833	NA	1	9.63439	16.8846	14.2694	8.22592	10.3049	18.8997	25.4271	14.5784	16.1217	15.6744	22.3086	17.7695
ACTG1P15	0.469537	0.0288721	0.0581899	0.496171	0.619774	NA	1	0	0	2.25306	0	0	0	0	0	0	2.41145	0.96994	0
ACTG1P16	0.99679	0.191197	0.115766	1.65158	0.09862	NA	1	0	0.888663	0	0	0	0.859079	1.10553	2.65063	0	3.61717	0.96994	1.87047
ACTG1P17	14.8364	0.294686	0.254501	1.1579	0.246905	NA	1	13.7634	16.8846	19.5265	7.19768	7.92686	10.3089	17.6884	11.9278	24.1826	13.263	21.3387	14.0285
ACTG1P18	0.217469	0	0.0580207	0	1	NA	1	0	0.888663	0.751021	0	0	0	0	0	0	0	0.96994	0
ACTG1P19	0.268583	0	0.0580207	0	1	NA	1	0	0	2.25306	0	0	0	0	0	0	0	0.96994	0
ACTG1P20	11.3037	0.127148	0.249584	0.509437	0.610446	NA	1	15.1398	8.88663	10.5143	10.2824	11.8903	4.29539	13.2663	6.62657	17.0174	12.0572	11.6393	14.0285
ACTG1P21	1.01136	0.0740986	0.0733946	1.00959	0.312691	NA	1	0	0	0.751021	0	0	0	2.21105	0	0	7.23435	1.93988	0
ACTG1P22	0.752725	0.0531711	0.0593242	0.896281	0.370103	NA	1	0	0	3.00408	0	0	0	0	0	0	6.02862	0	0
ACTG1P23	1.41575	0.0554732	0.107663	0.515247	0.606381	NA	1	0	0.888663	3.00408	3.08472	0	1.71816	0	0	0	3.61717	0	4.67618
ACTG1P24	2.70457	0.106234	0.166208	0.639162	0.522718	NA	1	1.37634	3.55465	5.25714	4.11296	0.792686	0	1.10553	2.65063	1.7913	6.02862	4.8497	0.935235
ACTG1P25	1.43727	0.0567957	0.0752955	0.754305	0.450666	NA	1	0	0	6.00816	0	0	0.859079	0	0	0	8.44007	1.93988	0
ACTG1P3	9.27405	0.197323	0.237947	0.829273	0.40695	NA	1	9.63439	7.99797	6.00816	7.19768	6.34149	4.29539	9.94973	17.2291	8.95652	4.8229	22.3086	6.54665
ACTG1P9	10.7967	-0.20477	0.245666	-0.833531	0.404546	NA	1	5.50537	15.1073	12.0163	15.4236	12.683	13.7453	6.63316	6.62657	12.5391	16.8801	6.78958	5.61141
ACTG2	2.73838	0.138458	0.120685	1.14727	0.25127	NA	1	1.37634	0.888663	3.7551	0	0.792686	1.71816	0	0	0.895652	15.6744	7.75952	0
ACTL10	48.7587	0.452883	0.230073	1.96843	0.0490186	0.158545	0.158545	38.5376	49.7651	57.8286	25.706	31.7074	29.2087	55.2763	37.1088	84.1913	54.2576	76.6253	44.8913
ACTL11P	3.84711	0.195572	0.128735	1.51919	0.128715	NA	1	2.75268	1.77733	9.76327	1.02824	0	1.71816	0	0	0.895652	25.3202	2.90982	0
ACTL6A	1979.79	-0.132535	0.0758703	-1.74686	0.0806614	0.226992	0.226992	1994.32	2075.92	1848.26	2352.61	2194.95	2168.31	1820.8	2140.38	1657.85	1995.47	1529.6	1978.96
ACTL6B	5.33713	0.13928	0.111522	1.2489	0.211702	NA	1	1.37634	0.888663	8.26123	0	0	6.01355	0	0	0	34.966	10.6693	1.87047
ACTL7A	1.33817	0.0411657	0.0632502	0.650838	0.515151	NA	1	0	0	3.00408	0	0	0	0	0	0	7.23435	5.81964	0
ACTL7B	2.85987	0.109847	0.11982	0.916771	0.359262	NA	1	4.12902	0	7.51021	0	0	2.57724	0	0	0.895652	9.64579	5.81964	3.74094
ACTL8	2.55969	0.148553	0.131906	1.1262	0.260079	NA	1	1.37634	2.66599	7.51021	1.02824	0	2.57724	0	1.32531	0	13.263	0.96994	0
ACTL9	1.96156	0.0516088	0.0867562	0.594871	0.55193	NA	1	0	0	7.51021	0	0	2.57724	0	0	0.895652	9.64579	2.90982	0
QDPR	876.069	-1.18857	0.086204	-13.7879	3.01353e-43	9.09709e-41	9.09709e-41	1273.12	1253.01	1113.76	1255.48	1199.33	1255.97	554.974	519.523	523.956	495.553	499.519	568.623
ACTN1-DT	3.27359	0.21702	0.193494	1.12158	0.262039	NA	1	4.12902	2.66599	5.25714	1.02824	0.792686	1.71816	3.31658	1.32531	1.7913	4.8229	7.75952	4.67618
ACTN2	5.56982	0.0833528	0.130413	0.639145	0.522728	NA	1	0	2.66599	14.2694	0	5.5488	2.57724	0	0	1.7913	16.8801	18.4289	4.67618
ACTN3	7.08989	0.109335	0.127276	0.859043	0.390317	NA	1	1.37634	4.44332	21.0286	0	0	7.73171	2.21105	0	6.26956	31.3488	10.6693	0
ACTN4	9317.6	-0.183914	0.0886449	-2.07473	0.0380117	0.131642	0.131642	8831.98	10070.3	10283	9414.57	9839.61	10945.5	7995.16	8552.25	8236.42	8344.82	9721.71	9575.87
ACTN4P1	4.68589	0.25323	0.175588	1.44218	0.149252	NA	1	2.75268	5.33198	6.75918	3.08472	0.792686	4.29539	0	1.32531	0.895652	20.4973	5.81964	4.67618
ACTN4P2	0.724799	0.0450457	0.0592161	0.760699	0.446837	NA	1	0	0	3.7551	0	0	0	0	1.32531	0	3.61717	0	0
ACTP1	0.301431	0.0427829	0.0580207	0.737374	0.460895	NA	1	0	0	0	0	0	0	0	0	0	3.61717	0	0
ACTR10	485.984	0.00949194	0.100774	0.0941903	0.924958	0.964489	0.964489	451.44	429.224	438.596	476.075	535.063	463.902	554.974	454.582	511.417	529.313	485.94	501.286
IRF4	1712.78	-1.09109	0.0791966	-13.777	3.50761e-43	1.03725e-40	1.03725e-40	2381.07	2286.53	1989.45	2433.84	2320.19	2200.96	1235.98	1080.13	1317.5	1056.21	1186.24	1065.23
ACTR1AP1	0.648632	-0.045916	0.0758981	-0.60497	0.545199	NA	1	1.37634	0	0.751021	1.02824	0	1.71816	0	0	0	0	2.90982	0
ACTR1B	789.359	0.121246	0.0840492	1.44256	0.149145	0.3444	0.3444	730.837	742.034	692.441	720.796	714.21	713.894	1014.87	748.802	954.765	780.104	848.697	810.849
GCNT4	87.8884	-3.14265	0.230005	-13.6634	1.68054e-42	4.87022e-40	4.87022e-40	191.311	177.733	171.233	178.914	174.391	138.312	1.10553	0	1.7913	8.44007	5.81964	5.61141
PLCG1	1464.77	-1.11468	0.0818319	-13.6216	2.98039e-42	8.46781e-40	8.46781e-40	2550.36	2507.81	2391.25	1242.11	1170	1088.45	1782.11	495.667	1557.54	553.427	1712.91	525.602
ACTR3-AS1	53.34	0.134986	0.225451	0.598736	0.549349	0.748168	0.748168	34.4085	51.5425	45.8123	29.819	43.5977	57.5583	74.0702	47.7113	72.5478	48.229	81.475	53.3084
ACTR3B	203.193	-0.0708872	0.153172	-0.462795	0.643512	0.813431	0.813431	220.215	179.51	171.984	235.467	212.44	207.897	195.678	210.725	227.496	223.059	165.86	187.982
ACTR3BP2	0.707173	-0.00453751	0.0666097	-0.0681209	0.945689	NA	1	0	0	3.7551	0	1.58537	0	0	0	0	1.20572	1.93988	0
ACTR3BP3	0.325615	0.0301218	0.0580207	0.519156	0.603652	NA	1	1.37634	0	0	0	0	0	0	1.32531	0	1.20572	0	0
ACTR3C	4.60361	0.127763	0.168571	0.757916	0.448501	NA	1	1.37634	4.44332	6.00816	1.02824	2.37806	6.87263	1.10553	2.65063	0.895652	16.8801	10.6693	0.935235
ACTR3P2	0.450722	-0.00893911	0.0581475	-0.153732	0.877821	NA	1	1.37634	0	3.00408	1.02824	0	0	0	0	0	0	0	0
ACTR3P3	0.293081	0.0301218	0.0580207	0.519156	0.603652	NA	1	0	0	0	0	0	0	1.10553	0	0	2.41145	0	0
ACTR5	237.899	-0.218489	0.151946	-1.43794	0.150452	0.346106	0.346106	225.72	183.065	218.547	343.432	331.343	243.119	174.673	249.159	197.043	259.231	161.98	267.477
ACTR6	349.368	-0.0771802	0.135209	-0.570823	0.568119	0.761029	0.761029	414.279	321.696	332.702	392.788	393.172	335.9	361.507	380.365	298.252	340.014	282.253	339.49
ACTR8	567.95	0.146816	0.103879	1.41334	0.157555	0.358058	0.358058	572.558	580.297	475.396	527.487	538.234	495.688	687.637	561.933	618	594.422	583.904	579.846
ACTRT1	0.469537	0.0288721	0.0581899	0.496171	0.619774	NA	1	0	0	2.25306	0	0	0	0	0	0	2.41145	0.96994	0
ACTRT1P1	0.25635	0.0427829	0.0580207	0.737374	0.460895	NA	1	0	0	0	0	0	0	0	0	0	1.20572	0	1.87047
ACTRT2	1.07282	0.0807749	0.0877731	0.92027	0.357432	NA	1	0	0.888663	5.25714	0	0	0	0	0	0	4.8229	0.96994	0.935235
ACTRT3	0.987549	0.0880966	0.0934172	0.943044	0.345658	NA	1	1.37634	0	0.751021	0	0	0.859079	0	0	0.895652	6.02862	1.93988	0
ICAM3	989.248	1.32721	0.0977287	13.5805	5.2245e-42	1.45583e-39	1.45583e-39	518.881	495.874	515.2	499.725	540.612	469.057	1660.5	1396.88	1802.05	1264.8	1434.54	1272.86
ACVR1B	832.021	-0.0616244	0.0904621	-0.681218	0.495733	0.707702	0.707702	839.568	948.203	844.898	798.943	829.15	885.71	748.441	811.092	871.469	747.549	813.78	845.453
ACVR1C	13.4303	0.488448	0.239738	2.03742	0.0416076	NA	1	1.37634	6.22064	12.7673	7.19768	11.8903	11.168	4.4221	14.5784	14.3304	37.3775	15.519	24.3161
ACVR2A	240.254	0.18384	0.158828	1.15748	0.247078	0.476872	0.476872	225.72	232.83	241.829	157.321	171.22	169.238	457.688	212.05	309	166.39	343.359	196.399
ACVR2B	844.513	-0.187895	0.113139	-1.66075	0.0967635	0.257598	0.257598	953.805	842.453	847.151	1049.83	861.65	906.328	842.411	869.405	637.704	763.223	738.124	822.072
ACVR2B-AS1	20.669	0.339039	0.253013	1.34	0.180244	0.39174	0.39174	19.2688	16.8846	19.5265	23.6495	16.6464	15.4634	13.2663	26.5063	12.5391	25.3202	27.1583	31.798
EPHB4	655.613	-1.74183	0.12884	-13.5194	1.2015e-41	3.28487e-39	3.28487e-39	1110.71	989.082	957.551	1093.02	1144.64	1014.57	222.211	280.966	206.896	242.351	242.485	362.871
ACY1	35.5323	0.228633	0.244942	0.933418	0.350604	0.583133	0.583133	39.9139	34.6579	23.2816	25.706	32.5001	40.3767	22.1105	49.0366	44.7826	39.7889	35.8878	38.3446
SNX9	1036.19	1.28467	0.0952202	13.4915	1.75377e-41	4.70594e-39	4.70594e-39	862.966	880.665	794.58	377.364	393.965	408.921	2132.56	1053.62	1741.15	979.048	1856.47	953.005
ACYP1	186.535	-0.106648	0.139386	-0.765125	0.444197	0.665675	0.665675	180.301	150.184	166.727	219.015	229.086	209.615	183.517	204.098	145.096	209.796	146.461	194.529
ACYP2	95.775	-0.123397	0.173534	-0.711081	0.477034	0.693461	0.693461	82.5805	79.9797	96.8817	102.824	95.1223	103.089	96.1808	92.7719	108.374	80.7835	112.513	98.1997
TEAD1	157.739	-2.53861	0.189021	-13.4303	4.01744e-41	1.05841e-38	1.05841e-38	247.741	254.158	283.886	311.557	329.757	280.06	29.8492	37.1088	17.913	49.4347	25.2184	26.1866
ADA2	452.055	-0.0866587	0.117088	-0.740114	0.459231	0.679699	0.679699	349.591	359.909	392.784	514.12	509.697	506.856	527.336	474.462	439.765	444.912	389.916	515.315
ADAD1	1.55929	-0.00882454	0.0960022	-0.0919202	0.926761	NA	1	0	2.66599	8.26123	0	0	0.859079	1.10553	0	0	0	5.81964	0
ADAD2	11.9022	0.490071	0.212424	2.30704	0.0210528	NA	1	6.88171	9.77529	21.7796	1.02824	2.37806	3.43631	8.84421	1.32531	9.85217	37.3775	24.2485	15.899
ADAL	364.994	0.0984686	0.115043	0.855927	0.392038	0.622984	0.622984	328.946	314.587	386.025	332.122	379.697	358.236	355.979	389.642	388.713	356.894	385.066	404.022
ADAM10	10641.7	0.1397	0.0738782	1.89096	0.0586303	0.180564	0.180564	9798.18	9758.41	8477.52	11374.4	11347.3	10045.2	10714.8	12403.6	10334	11218.1	9678.06	12550.9
MSI2	1754.06	-1.0089	0.0752531	-13.4068	5.51819e-41	1.42783e-38	1.42783e-38	2438.88	2210.11	2170.45	2826.63	2581.78	2588.4	700.903	1286.88	822.209	1279.27	800.2	1343
ADAM12	5.07891	0.163033	0.138906	1.1737	0.240517	NA	1	1.37634	2.66599	20.2776	0	1.58537	2.57724	0	0	0.895652	22.9088	6.78958	1.87047
ADAM15	822.316	0.179911	0.129266	1.39179	0.163985	0.368281	0.368281	858.837	830.011	683.429	822.592	809.332	686.404	821.406	854.827	1004.92	900.676	701.267	894.085
ADAM17	1783.91	-0.09753	0.0820466	-1.18871	0.234552	0.461649	0.461649	2036.99	1905.29	1728.85	1779.88	1697.14	1512.84	2069.54	1593.03	2116.43	1504.74	1906.9	1555.3
ADAM18	3.01248	0.0317288	0.0926573	0.342431	0.732026	NA	1	0	2.66599	9.01225	0	0	1.71816	0	0	0	7.23435	15.519	0
ADAM19	129.458	-0.405335	0.209554	-1.93427	0.0530796	0.168372	0.168372	183.053	204.393	199.771	113.106	141.098	116.835	79.5979	60.9644	107.478	106.104	151.311	89.7826
ADAM1B	1.10785	-0.0420655	0.0937178	-0.448853	0.653538	NA	1	2.75268	0	0	3.08472	0	0.859079	4.4221	0	0	1.20572	0.96994	0
ADAM2	2.09495	0.12202	0.0959358	1.2719	0.20341	NA	1	0	0.888663	8.26123	0	0	0	0	0	1.7913	13.263	0	0.935235
ADAM20	2.68823	0.14308	0.168027	0.85153	0.394475	NA	1	5.50537	7.1093	4.50612	2.05648	1.58537	0	1.10553	1.32531	0.895652	7.23435	0	0.935235
ADAM20P3	0.312925	0	0.0580207	0	1	NA	1	0	0	3.7551	0	0	0	0	0	0	0	0	0
ADAM21	3.96941	0.218338	0.202946	1.07584	0.281999	NA	1	2.75268	4.44332	6.00816	4.11296	0.792686	1.71816	2.21105	3.97594	3.58261	8.44007	6.78958	2.80571
ADAM21P1	0.748656	0.0996063	0.0837253	1.18968	0.234172	NA	1	0	0.888663	1.50204	0	0	0	1.10553	0	0	3.61717	0	1.87047
LMO7	632.554	1.57632	0.117901	13.3698	9.07481e-41	2.30691e-38	2.30691e-38	269.763	275.486	265.11	299.218	247.318	322.154	1123.21	1052.3	990.591	859.681	1030.08	855.74
ADAM23	8.37386	0.114548	0.238206	0.480875	0.630605	NA	1	8.25805	5.33198	13.5184	6.16944	3.96343	7.73171	5.52763	5.30125	11.6435	7.23435	15.519	10.2876
FOSL2	3206.71	1.01866	0.0774933	13.1452	1.81423e-39	4.53246e-37	4.53246e-37	3977.63	4061.19	3734.83	1440.56	1491.84	1413.18	4479.59	2752.68	4329.58	2815.37	4599.46	3384.62
ADAM29	1.57713	0.0414632	0.0978439	0.423769	0.671734	NA	1	0	0.888663	5.25714	1.02824	0	2.57724	0	0	0	7.23435	1.93988	0
ADAM30	0.517181	0.00356321	0.0619903	0.0574801	0.954163	NA	1	0	0	1.50204	0	0	0.859079	0	0	0	0	2.90982	0.935235
ADAM32	16.9712	0.174917	0.24473	0.714733	0.474774	0.692588	0.692588	9.63439	24.8826	26.2857	13.3671	15.061	12.8862	14.3718	5.30125	8.06087	33.7603	21.3387	18.7047
ADAM33	13.027	0.13616	0.142114	0.958105	0.33801	NA	1	0	4.44332	38.302	3.08472	0.792686	16.3225	0	1.32531	1.7913	51.8461	28.1283	10.2876
ADAM3A	2.20151	0.124263	0.102226	1.21557	0.224149	NA	1	0	0.888663	5.25714	1.02824	0	0	0	0	0.895652	14.4687	3.87976	0
ADAM3B	6.9269	0.0864183	0.230833	0.374375	0.708125	NA	1	5.50537	2.66599	3.7551	4.11296	7.92686	8.59079	5.52763	3.97594	5.37391	10.8515	14.5491	10.2876
ADAM5	2.68963	0.152211	0.136081	1.11853	0.263341	NA	1	0	3.55465	2.25306	0	0.792686	3.43631	0	1.32531	0.895652	13.263	5.81964	0.935235
ADAM7	0.563565	0.053385	0.0584534	0.913291	0.36109	NA	1	0	0	0	0	0	0	0	0	0	4.8229	1.93988	0
ADAM7-AS1	4.81572	0.0535537	0.176759	0.302976	0.761908	NA	1	9.63439	0.888663	12.7673	1.02824	5.5488	5.15447	0	1.32531	2.68696	3.61717	4.8497	10.2876
ADAM7-AS2	0.725716	0.0550635	0.0592026	0.930087	0.352326	NA	1	0	0.888663	0	0	0	0	0	0	1.7913	6.02862	0	0
ADAM8	84.3539	0.260487	0.201273	1.2942	0.195597	0.410992	0.410992	67.4407	67.5384	75.8531	76.0898	71.3417	80.7534	126.03	78.1935	81.5043	101.281	81.475	104.746
NELL2	183.553	-2.1951	0.169602	-12.9427	2.58436e-38	6.34702e-36	6.34702e-36	213.333	216.834	240.327	405.127	434.392	370.263	34.2713	96.7479	33.1391	61.4919	36.8577	59.8551
ADAMDEC1	2.22207	0.20626	0.158074	1.30483	0.19195	NA	1	1.37634	2.66599	0.751021	1.02824	0.792686	1.71816	1.10553	0	0.895652	9.64579	3.87976	2.80571
ADAMTS1	215.782	0.106685	0.150787	0.707519	0.479244	0.694702	0.694702	218.838	210.613	178.743	191.253	214.818	174.393	267.537	216.026	287.504	217.03	214.357	198.27
ADAMTS10	917.318	-0.320661	0.172141	-1.86278	0.0624931	0.189121	0.189121	820.3	790.91	850.906	1148.54	1196.96	1257.69	923.114	1220.61	603.669	655.914	621.732	917.466
ADAMTS12	3.68137	0.345997	0.167267	2.06853	0.0385906	NA	1	0	3.55465	3.00408	0	1.58537	3.43631	2.21105	3.97594	0.895652	21.703	1.93988	1.87047
ADAMTS13	54.2718	0.172842	0.244708	0.706319	0.479989	0.695366	0.695366	45.4193	51.5425	84.1143	54.4967	40.427	42.9539	55.2763	39.7594	47.4696	85.6064	63.0461	41.1503
ADAMTS14	8.16555	0.155586	0.125015	1.24453	0.213304	NA	1	0	5.33198	21.0286	0	0.792686	3.43631	0	0	2.68696	43.4061	20.3687	0.935235
ADAMTS15	8.15968	0.175735	0.138809	1.26602	0.205505	NA	1	0	3.55465	18.0245	1.02824	0.792686	6.01355	1.10553	0	2.68696	43.4061	20.3687	0.935235
ADAMTS16	4.68977	0.0784347	0.100089	0.783652	0.433244	NA	1	0	1.77733	12.7673	0	0	6.01355	0	0	0	24.1145	10.6693	0.935235
ADAMTS16-DT	3.07523	0.198285	0.126207	1.5711	0.116159	NA	1	2.75268	1.77733	6.00816	0	0	0.859079	0	0	0	16.8801	5.81964	2.80571
HNRNPLL	247.023	-1.85175	0.145533	-12.7239	4.35558e-37	1.05187e-34	1.05187e-34	392.257	335.026	343.967	474.019	502.563	425.244	49.7487	100.724	43.8869	109.721	54.3166	132.803
HUNK	798.654	-1.12015	0.0880975	-12.7149	4.8897e-37	1.1615e-34	1.1615e-34	1563.52	1502.73	1465.24	700.232	668.234	657.195	741.808	330.003	703.982	273.699	676.048	301.146
ADAMTS19	4.76003	0.222398	0.177086	1.25588	0.20916	NA	1	2.75268	4.44332	3.7551	0	0.792686	2.57724	5.52763	0	4.47826	14.4687	15.519	2.80571
ADAMTS19-AS1	1.89975	0.183616	0.146821	1.25061	0.211075	NA	1	0	1.77733	0	0	0	1.71816	3.31658	2.65063	1.7913	4.8229	4.8497	1.87047
ADAMTS2	13.9593	0.0597592	0.0986263	0.605915	0.544571	NA	1	0	8.88663	42.0572	2.05648	0	9.44986	0	0	3.58261	53.0519	46.5571	1.87047
ADAMTS20	1.96031	0.0780884	0.101297	0.770887	0.440774	NA	1	0	0	6.75918	0	0	1.71816	0	0	1.7913	8.44007	3.87976	0.935235
ADAMTS3	46.3704	0.378246	0.241716	1.56484	0.117621	0.293191	0.293191	22.0215	28.4372	47.3143	35.9884	40.427	36.9404	56.3818	37.1088	60.0087	78.3721	60.1363	53.3084
ADAMTS4	10.1019	0.23928	0.158438	1.51024	0.130983	NA	1	0	4.44332	23.2816	1.02824	2.37806	7.73171	1.10553	2.65063	3.58261	51.8461	20.3687	2.80571
ADAMTS5	11.2492	0.259522	0.241626	1.07406	0.282795	NA	1	11.0107	9.77529	15.0204	9.25416	7.92686	3.43631	5.52763	7.95188	13.4348	18.0859	23.2786	10.2876
ADAMTS6	112.812	0.18725	0.172083	1.08814	0.276534	0.509275	0.509275	103.226	102.196	115.657	111.05	105.427	86.7669	120.502	100.724	138.826	118.161	120.273	130.933
ADAMTS7	15.6055	0.145082	0.148967	0.97392	0.330096	NA	1	1.37634	5.33198	53.3225	3.08472	1.58537	19.7588	1.10553	0	4.47826	71.1377	23.2786	2.80571
ADAMTS7P1	4.5969	0.0593395	0.100218	0.592107	0.553779	NA	1	0	0.888663	16.5225	0	0	4.29539	0	0	1.7913	18.0859	13.5792	0
ADAMTS7P3	5.53772	0.0551879	0.104612	0.527548	0.597813	NA	1	0	6.22064	26.2857	0	0	4.29539	0	0	0.895652	18.0859	10.6693	0
ADAMTS7P4	5.90983	0.163918	0.125572	1.30537	0.191768	NA	1	0	0.888663	13.5184	0	1.58537	1.71816	2.21105	0	2.68696	33.7603	14.5491	0
ADAMTS8	5.20254	0.138051	0.111759	1.23526	0.216735	NA	1	0	0.888663	8.26123	0	0	5.15447	0	0	1.7913	33.7603	11.6393	0.935235
TARS3	1104.4	-1.14586	0.0910506	-12.5849	2.55818e-36	5.97872e-34	5.97872e-34	1658.49	1800.43	1821.22	768.095	730.857	775.748	1583.11	316.75	1462.6	370.157	1657.63	307.692
ADAMTS9-AS1	1.59526	0.0571091	0.0663596	0.8606	0.389459	NA	1	0	0	1.50204	0	0	0	0	0	0	10.8515	6.78958	0
ADAMTS9-AS2	3.05585	0.0457046	0.0887848	0.514779	0.606707	NA	1	0	1.77733	7.51021	0	0	5.15447	0	0	0	14.4687	7.75952	0
ADAMTSL1	11.1362	0.281206	0.155987	1.80276	0.071426	NA	1	5.50537	7.1093	31.5429	0	0	6.01355	1.10553	1.32531	1.7913	59.0805	14.5491	5.61141
BMP2K	1781.73	-0.837677	0.0677004	-12.3733	3.64594e-35	8.38566e-33	8.38566e-33	2546.23	2383.39	2443.82	2202.49	1949.21	2030	1468.14	1146.4	1387.36	1126.15	1551.9	1145.66
ADAMTSL3	5.48222	0.108292	0.116129	0.932517	0.351069	NA	1	0	4.44332	15.0204	0	1.58537	6.01355	0	0	1.7913	30.1431	6.78958	0
ADAMTSL4	19.8634	0.40646	0.228543	1.77848	0.0753243	0.216859	0.216859	4.12902	7.99797	34.5469	6.16944	5.5488	20.6179	17.6884	18.5544	13.4348	49.4347	36.8577	23.3809
ADAMTSL4-AS1	6.93495	0.00956508	0.220451	0.0433887	0.965392	NA	1	4.12902	3.55465	17.2735	6.16944	5.5488	7.73171	6.63316	5.30125	7.16522	12.0572	4.8497	2.80571
ADAMTSL4-AS2	1.81491	0.146581	0.123986	1.18224	0.237109	NA	1	1.37634	0	5.25714	0	0	0.859079	1.10553	0	0.895652	8.44007	2.90982	0.935235
ADAMTSL5	7.30553	0.120822	0.125855	0.960015	0.337047	NA	1	0	5.33198	21.0286	0	0.792686	6.87263	0	0	1.7913	32.5546	16.489	2.80571
ADAP1	12.1392	0.0115043	0.145069	0.0793021	0.936792	NA	1	0	2.66599	27.7878	16.4518	12.683	10.3089	0	0	12.5391	40.9946	20.3687	1.87047
ADAP2	35.3703	0.043106	0.250766	0.171898	0.863518	0.936333	0.936333	38.5376	16.8846	44.3102	33.9319	31.7074	38.6585	29.8492	23.8556	34.9304	42.2003	46.5571	43.0208
ADAR	7706.5	0.0531605	0.0583127	0.911646	0.361955	0.593967	0.593967	7326.27	7518.98	6874.09	8087.11	7886.43	7464.53	7921.09	8462.12	7540.49	7499.6	7532.55	8364.74
ZFYVE16	959.553	0.986735	0.0805553	12.2492	1.69761e-34	3.84349e-32	3.84349e-32	637.246	676.273	618.09	637.509	640.49	585.892	1418.39	1304.11	1237.79	1202.11	1301.66	1255.09
ADARB2	180.186	0.166313	0.155523	1.06938	0.284898	0.517833	0.517833	198.193	208.836	195.265	98.7111	124.452	116.835	285.226	104.7	259.739	144.687	289.042	136.544
ADARB2-AS1	2.09198	0.0824441	0.0820543	1.00475	0.315017	NA	1	0	0.888663	9.01225	0	0	0	0	0	0	13.263	1.93988	0
IGHD	423.943	1.34064	0.10993	12.1954	3.2882e-34	7.33015e-32	7.33015e-32	247.741	255.935	265.11	170.688	164.879	191.575	760.602	425.426	804.295	476.261	824.449	500.351
ADAT2	511.104	-0.192962	0.11611	-1.66189	0.0965357	0.257227	0.257227	531.268	478.101	468.637	596.379	581.832	562.696	484.22	572.535	513.209	454.558	403.495	486.322
ADAT3	62.0496	-0.162671	0.21418	-0.759505	0.44755	0.668902	0.668902	74.3224	55.9858	42.0572	83.2875	65.7929	68.7263	57.4873	59.6391	59.113	56.669	50.4369	71.0779
ADCK1	124.256	0.191155	0.177583	1.07643	0.281736	0.515059	0.515059	116.989	113.749	137.437	110.022	104.635	98.794	139.296	94.0972	154.052	151.921	151.311	118.775
ADCK2	363.825	0.0386399	0.123638	0.312525	0.754642	0.881603	0.881603	366.107	383.902	322.188	366.054	372.562	340.195	401.306	340.605	390.504	389.449	314.261	378.77
ADCK5	635.491	-0.150717	0.095526	-1.57776	0.114621	0.287844	0.287844	617.977	635.394	660.898	595.351	642.076	726.78	640.1	552.656	669.052	576.336	677.988	631.284
ADCY1	6.97538	0.291027	0.145657	1.99803	0.0457135	NA	1	0	3.55465	19.5265	0	0.792686	2.57724	0	5.30125	1.7913	43.4061	5.81964	0.935235
ADCY10	4.71935	0.128155	0.187492	0.683523	0.494276	NA	1	1.37634	1.77733	9.76327	4.11296	4.75612	4.29539	1.10553	6.62657	0.895652	13.263	6.78958	1.87047
ADCY2	9.80828	0.282201	0.180388	1.56441	0.117721	NA	1	2.75268	11.5526	31.5429	4.11296	4.75612	2.57724	0	1.32531	4.47826	42.2003	6.78958	5.61141
ADCY3	1851.95	0.172186	0.107515	1.60151	0.109264	0.278103	0.278103	1807.14	1787.99	1572.64	1794.28	1837.45	1640.84	2224.32	2083.39	1910.43	1751.92	1674.12	2138.88
ADCY4	8.38328	0.285933	0.152265	1.87786	0.0604001	NA	1	1.37634	3.55465	15.7714	0	0	2.57724	4.4221	0	5.37391	48.229	16.489	2.80571
ADCY5	22.7063	0.291664	0.203738	1.43157	0.152268	0.349107	0.349107	11.0107	19.5506	55.5755	5.1412	11.0976	14.6043	6.63316	2.65063	7.16522	74.7549	45.5872	18.7047
ADCY6	2297.83	-0.10129	0.0917237	-1.10429	0.269467	0.500843	0.500843	2498.06	2396.72	2128.39	2305.31	2313.06	2045.47	2494.07	2006.52	2504.24	1856.82	2698.37	2326.87
ADCY6-DT	12.0116	-0.121789	0.245765	-0.495553	0.62021	NA	1	15.1398	13.3299	13.5184	15.4236	13.4757	7.73171	3.31658	7.95188	17.0174	13.263	16.489	7.48188
ZNF562	273.732	-2.42183	0.199906	-12.1149	8.81063e-34	1.93433e-31	1.93433e-31	509.246	496.763	431.086	516.177	493.051	491.393	56.3818	53.0125	35.8261	42.2003	70.8056	88.8473
ADCY8	7.31603	0.192404	0.124413	1.5465	0.121985	NA	1	0	6.22064	18.0245	0	0	2.57724	0	0	3.58261	45.8175	9.6994	1.87047
RCC1L	708.227	1.19711	0.0990024	12.0918	1.16764e-33	2.52524e-31	2.52524e-31	417.032	466.548	411.559	388.675	444.697	413.217	1048.04	960.852	1060.45	1028.48	886.525	972.645
ADCYAP1	2.12701	0.0811953	0.101107	0.803062	0.421939	NA	1	0	0	10.5143	0	0	0.859079	0	0	0.895652	8.44007	3.87976	0.935235
ADCYAP1R1	3.75169	0.0848783	0.10174	0.834269	0.40413	NA	1	0	0.888663	8.26123	0	0	6.01355	0	0	0	19.2916	7.75952	2.80571
ADD1	3294.88	-0.0466521	0.0556359	-0.838526	0.401735	0.631566	0.631566	3527.56	3622.19	3454.69	3041.53	3180.26	3106.43	3381.8	2970.03	3441.09	2904.59	3759.49	3148.94
ADD2	3038.87	-0.13594	0.0636141	-2.13694	0.032603	0.116807	0.116807	3161.46	3421.35	3159.54	3007.6	3073.24	2906.26	3369.64	2927.62	3053.28	2614.01	3141.64	2630.82
ZNF664	3856.95	-0.605935	0.0501411	-12.0846	1.27368e-33	2.71406e-31	2.71406e-31	4518.53	4445.98	4544.43	4953.03	4508.01	4760.15	3085.52	3164.85	3188.52	2991.4	2978.69	3144.26
ADD3-AS1	12.1554	0.131021	0.228853	0.572513	0.566975	NA	1	2.75268	8.88663	24.0327	6.16944	5.5488	7.73171	17.6884	3.97594	17.0174	19.2916	27.1583	5.61141
ADGB	2.70897	0.104114	0.0973062	1.06996	0.284635	NA	1	0	0	9.76327	0	0	0	0	0	1.7913	13.263	5.81964	1.87047
ADGB-DT	0.644419	0.0225312	0.0650227	0.346513	0.728958	NA	1	0	0	1.50204	0	0	1.71816	0	0	0.895652	3.61717	0	0
ADGRA1	8.30373	0.0529245	0.124208	0.426095	0.670039	NA	1	0	3.55465	18.7755	0	0.792686	16.3225	0	0	4.47826	27.7317	24.2485	3.74094
ADGRA1-AS1	6.3431	0.121099	0.120445	1.00543	0.314691	NA	1	0	2.66599	26.2857	0	0	2.57724	0	0	3.58261	26.5259	12.6092	1.87047
RAC3	157.634	-1.90912	0.158081	-12.0768	1.39984e-33	2.93967e-31	2.93967e-31	246.365	224.832	212.539	287.907	290.916	277.482	51.9597	66.2657	60.0087	56.669	45.5872	71.0779
BMF	3698.12	0.995199	0.0824238	12.0742	1.4461e-33	2.99343e-31	2.99343e-31	1713.55	1939.06	1930.12	2825.6	2885.38	2937.19	3932.36	5470.89	4220.31	5451.08	4433.6	6638.3
ADGRA3P1	1.76317	-0.11943	0.146548	-0.814956	0.415097	NA	1	0	4.44332	0.751021	5.1412	0.792686	2.57724	1.10553	2.65063	1.7913	0	0.96994	0.935235
ADGRB1	22.0236	0.077684	0.0962839	0.806822	0.419769	0.646176	0.646176	0	13.3299	50.3184	0	0	20.6179	0	1.32531	8.06087	101.281	56.2565	13.0933
CD59	402.577	-1.44329	0.120079	-12.0195	2.80556e-33	5.7257e-31	5.7257e-31	597.332	582.074	582.792	638.537	554.088	533.488	241.005	198.797	271.383	221.853	233.756	175.824
ADGRB3	26.3764	-0.37682	0.25415	-1.48267	0.138162	0.3276	0.3276	34.4085	39.9898	30.0408	37.0167	52.3173	21.477	11.0553	18.5544	9.85217	36.1717	10.6693	14.9638
ADGRB3-DT	19.7367	-0.0620963	0.252313	-0.246109	0.805598	0.908272	0.908272	19.2688	18.6619	22.5306	24.6778	25.366	15.4634	11.0553	17.2291	19.7043	22.9088	19.3988	20.5752
ADGRD1	55.6108	0.0552355	0.251797	0.219366	0.826365	0.919312	0.919312	67.4407	58.6518	109.649	39.0731	41.2197	48.1084	34.2713	19.8797	26.8696	90.4293	100.874	30.8628
ADGRD1-AS1	0.636043	0.037544	0.0588198	0.63829	0.523285	NA	1	0	0	0	0	0	0	1.10553	0	0	3.61717	2.90982	0
ADGRD2	10.4337	0.0774681	0.0913603	0.847941	0.396471	NA	1	0	3.55465	36.8	0	0	5.15447	0	0	5.37391	53.0519	19.3988	1.87047
ADGRE1	3.51434	0.143284	0.181047	0.791418	0.4287	NA	1	1.37634	5.33198	4.50612	3.08472	2.37806	4.29539	0	1.32531	0.895652	13.263	2.90982	2.80571
NQO1	944.52	1.14286	0.0954343	11.9753	4.78553e-33	9.63089e-31	9.63089e-31	959.31	942.872	875.69	435.974	390.794	398.612	1593.06	1048.32	1447.37	844.007	1497.59	900.632
ADGRE3	2.24474	-0.010417	0.140621	-0.0740783	0.940948	NA	1	0	1.77733	11.2653	1.02824	1.58537	2.57724	2.21105	0	0	3.61717	1.93988	0.935235
GAB2	2176.46	-0.771423	0.0645866	-11.944	6.97764e-33	1.38501e-30	1.38501e-30	2514.58	2669.54	2503.9	2723.81	2861.6	3018.8	1631.76	1562.54	1627.4	1645.81	1576.15	1781.62
ADGRF1	3.24489	0.211643	0.131107	1.61428	0.106468	NA	1	0	0	4.50612	0	0	1.71816	0	3.97594	5.37391	15.6744	5.81964	1.87047
ADGRF2	0.506024	0.0285037	0.0583104	0.488827	0.624964	NA	1	0	0	0.751021	0	0	0	0	0	0	2.41145	2.90982	0
ADGRF3	107.112	0.220868	0.17782	1.24209	0.214205	0.435687	0.435687	121.118	97.7529	99.1347	114.135	91.9516	103.949	100.603	139.158	85.0869	102.487	101.844	128.127
ADGRF4	0.826781	0.0489405	0.0595941	0.82123	0.411515	NA	1	0	0.888663	3.00408	0	0	0	0	0	0	6.02862	0	0
ADGRF5	1.82627	0.0982971	0.0796596	1.23396	0.217216	NA	1	0	0	1.50204	0	0	0.859079	0	0	0	15.6744	3.87976	0
ADGRF5P1	8.3789	0.467892	0.213077	2.19588	0.0281006	NA	1	1.37634	5.33198	14.2694	2.05648	2.37806	6.01355	4.4221	14.5784	5.37391	26.5259	12.6092	5.61141
ADGRG1	16.6497	0.256984	0.160417	1.60197	0.109163	0.277917	0.277917	5.50537	7.1093	38.302	0	4.75612	12.8862	4.4221	2.65063	0.895652	90.4293	29.0982	3.74094
ADGRG2	3.62074	0.180601	0.166009	1.08789	0.276642	NA	1	1.37634	0.888663	12.0163	4.11296	1.58537	1.71816	0	2.65063	1.7913	14.4687	0.96994	1.87047
ADGRG3	5.22907	0.229924	0.17058	1.3479	0.177692	NA	1	0	4.44332	8.26123	3.08472	4.75612	5.15447	1.10553	1.32531	0	28.9374	1.93988	3.74094
ADGRG4	1.85634	0.0819329	0.099185	0.826061	0.408769	NA	1	0	0	3.00408	1.02824	0	2.57724	0	0	0	10.8515	3.87976	0.935235
TNFAIP2	323.949	1.4394	0.121097	11.8863	1.39449e-32	2.73057e-30	2.73057e-30	156.903	141.297	165.225	192.281	184.696	158.07	490.854	518.197	446.035	514.844	408.345	510.638
ADGRG6	2.8978	0.0981625	0.104758	0.937042	0.348737	NA	1	0	0.888663	10.5143	0	0	1.71816	0	0	0	12.0572	6.78958	2.80571
ADGRG7	0.428345	0.00558685	0.0605533	0.0922634	0.926489	NA	1	0	0.888663	2.25306	0	0.792686	0	0	0	0	1.20572	0	0
FHOD1	2302.77	-0.761974	0.0649384	-11.7338	8.55433e-32	1.6527e-29	1.6527e-29	2943.99	2971.69	2726.96	2697.07	2860.01	2840.97	1878.29	1639.41	1993.72	1536.09	1815.73	1729.25
ADGRL1-AS1	139.769	0.179481	0.159851	1.1228	0.261522	0.492776	0.492776	139.011	152.85	151.706	101.796	118.903	142.607	153.668	141.809	139.722	147.098	157.13	130.933
ADGRL2	45.5215	-0.00340033	0.252957	-0.0134423	0.989275	0.994979	0.994979	22.0215	48.8765	50.3184	16.4518	28.5367	20.6179	120.502	21.205	89.5652	32.5546	84.3848	11.2228
AFF3	386.417	2.09329	0.181365	11.5419	8.11348e-31	1.5469e-28	1.5469e-28	96.3439	105.751	144.947	116.191	122.866	115.976	816.984	739.525	495.296	530.519	660.529	692.074
ADGRL3-AS1	0.931142	0.0928127	0.0956181	0.97066	0.331718	NA	1	0	0	0.751021	0	0	0.859079	0	0	0.895652	4.8229	2.90982	0.935235
ADGRL4	1.38889	0.0830421	0.0985011	0.843058	0.399196	NA	1	0	0	6.00816	0	0	0.859079	0	0	0.895652	6.02862	1.93988	0.935235
ADGRV1	18.4742	0.175088	0.202854	0.863125	0.388069	0.619567	0.619567	12.3871	11.5526	44.3102	16.4518	3.17074	21.477	5.52763	7.95188	6.26956	62.6977	25.2184	4.67618
ADH1A	0.463088	0.0424612	0.0580595	0.73134	0.464572	NA	1	0	0	0	0	0	0	0	0	0	3.61717	1.93988	0
ADH1B	1.16183	0.0651988	0.0752969	0.86589	0.386551	NA	1	0	0	6.00816	0	0	0	0	0	0	6.02862	0.96994	0.935235
ADH1C	0.603712	0.0200388	0.0643564	0.311373	0.755517	NA	1	0	0	3.00408	0	0	0.859079	0	0	0	2.41145	0.96994	0
ADH5	1578.93	0.0365179	0.093416	0.390917	0.695859	0.846243	0.846243	1505.72	1604.93	1398.4	1713.05	1739.15	1471.6	1580.9	1692.42	1578.14	1642.2	1301.66	1718.96
ADH5P3	1.02448	0.0482133	0.114886	0.419661	0.674733	NA	1	1.37634	0	2.25306	1.02824	0.792686	0	2.21105	1.32531	0.895652	2.41145	0	0
ADH5P4	6.80981	0.139412	0.218509	0.638015	0.523464	NA	1	11.0107	7.99797	6.00816	4.11296	7.13417	5.15447	6.63316	14.5784	2.68696	9.64579	5.81964	0.935235
ADH6	0.766195	-0.0077992	0.0792847	-0.0983695	0.921639	NA	1	0	0.888663	1.50204	0	0	1.71816	0	0	0	1.20572	3.87976	0
ADH7	0.353372	0.0174606	0.0580207	0.300938	0.763461	NA	1	0	0	0	0	0	0.859079	0	0	0	2.41145	0.96994	0
ADHFE1	5.11592	0.321615	0.207572	1.54941	0.121282	NA	1	4.12902	7.1093	6.00816	5.1412	0.792686	3.43631	2.21105	5.30125	1.7913	16.8801	4.8497	3.74094
CEACAM21	86.5533	-2.56225	0.222138	-11.5345	8.83908e-31	1.66335e-28	1.66335e-28	191.311	174.178	141.192	175.829	148.232	140.03	11.0553	14.5784	5.37391	12.0572	13.5792	11.2228
ADI1P1	0.402332	0.0165571	0.0581277	0.284839	0.775767	NA	1	0	0.888663	3.00408	0	0	0	0	0	0	0	0	0.935235
ADI1P2	0.487547	0.00658828	0.061117	0.107798	0.914156	NA	1	0	0	0.751021	0	0	1.71816	0	0	0	2.41145	0.96994	0
ADIG	0.512645	-0.0075423	0.0745556	-0.101163	0.919421	NA	1	0	0.888663	1.50204	0	1.58537	0	0	0	0	1.20572	0.96994	0
ADIPOQ	2.36321	0.0633526	0.0777618	0.814702	0.415243	NA	1	0	0	5.25714	0	0	2.57724	0	0	0	15.6744	4.8497	0
ADIPOQ-AS1	1.58435	0.120834	0.114406	1.05619	0.290882	NA	1	0	0.888663	3.00408	0	0	0.859079	2.21105	0	0	7.23435	3.87976	0.935235
ADIPOR1	1896.41	0.0915537	0.060303	1.51823	0.128957	0.313048	0.313048	1924.13	1916.85	1797.19	1831.3	1822.39	1887.4	1796.48	1881.94	1976.7	2064.2	1896.23	1962.12
ADIPOR1P1	0.437507	0.016261	0.0581613	0.279585	0.779796	NA	1	0	0	2.25306	0	0	0	0	0	1.7913	1.20572	0	0
ADIPOR1P2	0.775827	0.0426247	0.0594227	0.717313	0.473181	NA	1	0	0	2.25306	1.02824	0	0	0	0	0	6.02862	0	0
ADIPOR2	3174.96	0.15359	0.0692626	2.2175	0.0265887	0.10054	0.10054	2942.62	2933.48	2669.88	3285.23	3211.17	2993.89	3218.19	3656.54	3338.09	3312.12	2931.16	3607.2
ADIRF	1.80833	0.0133009	0.0745885	0.178323	0.858469	NA	1	0	0	7.51021	0	0	2.57724	0	0	0	4.8229	6.78958	0
ADIRF-AS1	40.8456	-0.198061	0.250656	-0.79017	0.429429	0.653135	0.653135	33.0322	44.4332	44.3102	25.706	36.4636	60.1355	36.4824	30.4822	37.6174	34.966	75.6553	30.8628
ADK	1112.18	-0.0896471	0.108751	-0.824334	0.40975	0.63876	0.63876	1136.86	1090.39	995.102	1289.41	1298.42	1166.63	971.757	1182.18	1097.17	1205.72	781.772	1130.7
ADM	4.97748	0.0614465	0.150263	0.408925	0.682594	NA	1	1.37634	0	12.0163	2.05648	0.792686	5.15447	3.31658	0	6.26956	13.263	14.5491	0.935235
ADM2	7.5377	0.126836	0.130322	0.97325	0.330429	NA	1	0	2.66599	18.7755	0	0	9.44986	2.21105	0	6.26956	33.7603	13.5792	3.74094
ADM5	62.2351	-0.0538633	0.223773	-0.240705	0.809783	0.911102	0.911102	68.8171	37.3238	69.0939	58.6097	86.4028	66.149	45.3266	64.9403	59.113	67.5206	54.3166	69.2074
ADM-DT	1.8599	0.0800698	0.116045	0.689988	0.490202	NA	1	0	0	3.00408	0	0	2.57724	1.10553	0	3.58261	7.23435	3.87976	0.935235
ADNP	5451.67	-0.051788	0.0793532	-0.652626	0.513997	0.721758	0.721758	5523.26	5330.2	4932.7	6213.66	5865.08	5311.68	5557.48	5959.93	5173.29	5173.76	4751.74	5627.31
ADNP2	1059.69	-0.15016	0.0821427	-1.82804	0.0675436	0.200022	0.200022	1150.62	1247.68	1101	1126.95	1085.19	1032.61	954.069	1036.39	1091.8	944.082	1008.74	937.106
ADNP-AS1	36.8548	0.289833	0.237783	1.2189	0.222884	0.447683	0.447683	30.2795	38.2125	39.8041	30.8472	26.9513	29.2087	59.6984	37.1088	33.1391	44.6118	36.8577	35.5389
ADO	778.72	-0.225904	0.105553	-2.14019	0.0323397	0.116106	0.116106	843.697	788.244	772.8	876.061	908.418	855.642	703.114	856.152	713.835	623.359	640.16	763.152
ADORA1	4.18817	0.0988316	0.112764	0.876449	0.380786	NA	1	0	0.888663	13.5184	0	0	3.43631	0	1.32531	0	15.6744	12.6092	2.80571
ADORA2A	9.68823	0.365288	0.227223	1.60761	0.10792	NA	1	6.88171	5.33198	13.5184	6.16944	2.37806	6.87263	7.73868	6.62657	11.6435	28.9374	14.5491	5.61141
ADORA2A-AS1	4.91724	0.0860211	0.114945	0.748366	0.45424	NA	1	0	2.66599	16.5225	0	0	4.29539	0	0	2.68696	19.2916	12.6092	0.935235
ADORA2B	8.55963	-0.590723	0.234287	-2.52136	0.0116901	NA	1	4.12902	14.2186	11.2653	11.3106	19.0245	17.1816	1.10553	3.97594	8.06087	4.8229	3.87976	3.74094
ADORA2BP1	0.463088	0.0424612	0.0580595	0.73134	0.464572	NA	1	0	0	0	0	0	0	0	0	0	3.61717	1.93988	0
ADORA3	1.59577	0.0985563	0.13993	0.704324	0.481231	NA	1	1.37634	0	3.00408	1.02824	1.58537	0	1.10553	0	2.68696	3.61717	1.93988	2.80571
PSTPIP1	104.439	2.30755	0.200693	11.4979	1.35214e-30	2.51187e-28	2.51187e-28	30.2795	27.5486	33.0449	13.3671	22.1952	23.1951	239.899	163.014	191.67	163.978	208.537	136.544
ADPGK-AS1	16.2842	0.274501	0.25443	1.07889	0.280639	0.513831	0.513831	11.0107	14.2186	18.7755	13.3671	12.683	10.3089	26.5326	14.5784	14.3304	20.4973	21.3387	17.7695
ADPRH	4.76405	0.133995	0.202836	0.660606	0.508865	NA	1	2.75268	7.99797	16.5225	1.02824	2.37806	4.29539	1.10553	2.65063	3.58261	7.23435	3.87976	3.74094
PLIN2	835.108	-1.18233	0.10286	-11.4945	1.40526e-30	2.5775e-28	2.5775e-28	1164.39	1210.36	1008.62	1197.9	1313.48	1090.17	538.391	500.968	505.148	497.964	463.631	530.278
ADPRM	138.349	0.00875378	0.165412	0.052921	0.957795	0.980853	0.980853	108.731	141.297	149.453	128.53	132.379	148.621	153.668	157.712	144.2	136.247	138.701	120.645
ADPRS	548.247	-0.0976051	0.112301	-0.86914	0.38477	0.616466	0.616466	532.644	592.738	536.98	501.781	672.198	612.523	488.642	532.776	507.835	587.188	466.541	547.113
ADRA1A	7.63559	0.182532	0.130898	1.39446	0.163179	NA	1	5.50537	0.888663	28.5388	0	0	1.71816	0	0	3.58261	39.7889	10.6693	0.935235
ADRA1B	3.28079	0.120717	0.113104	1.06731	0.28583	NA	1	0	0	6.00816	0	0	5.15447	1.10553	1.32531	0	18.0859	5.81964	1.87047
ADRA1D	4.43021	0.0395476	0.12154	0.325388	0.744888	NA	1	0	1.77733	12.7673	0	0	5.15447	0	0	6.26956	6.02862	16.489	4.67618
ADRA2A	3.96727	0.0423716	0.104006	0.407394	0.683719	NA	1	0	3.55465	14.2694	0	0	4.29539	0	0	1.7913	12.0572	11.6393	0
ADRA2B	4.18244	0.0161629	0.112496	0.143675	0.885757	NA	1	0	1.77733	13.5184	1.02824	0	6.01355	0	0	2.68696	9.64579	15.519	0
DSTN	761.061	-0.944554	0.082598	-11.4356	2.77746e-30	5.03068e-28	5.03068e-28	1194.66	1183.7	1150.56	823.62	806.954	774.03	658.893	372.413	693.235	424.415	626.581	423.662
ADRB1	7.51126	0.237011	0.191128	1.24007	0.214951	NA	1	2.75268	6.22064	11.2653	1.02824	0.792686	7.73171	5.52763	1.32531	4.47826	19.2916	20.3687	9.35235
ADRB2	13.9141	0.627949	0.248345	2.52853	0.011454	NA	1	0	4.44332	3.00408	4.11296	11.0976	12.0271	17.6884	30.4822	23.287	31.3488	13.5792	15.899
ADRB3	2.39921	0.091982	0.112784	0.815556	0.414754	NA	1	0	0.888663	9.01225	0	0	0.859079	0	0	0.895652	8.44007	7.75952	0.935235
ADRM1	2721.2	-0.166123	0.0917336	-1.81093	0.0701514	0.205701	0.205701	2855.91	3107.65	2977.8	2741.29	2837.02	3213.81	2051.86	2514.12	2690.54	2677.91	2373.44	2613.05
ADSL	399.01	0.108916	0.108776	1.00129	0.316686	0.550742	0.550742	411.526	349.245	367.249	425.691	390.794	378.854	415.678	442.655	403.043	405.123	354.028	444.237
ADSS1	73.9	0.22619	0.244271	0.925981	0.354456	0.587248	0.587248	78.4515	85.3117	66.0898	49.3555	62.6222	62.7127	58.5929	63.615	137.93	104.898	61.1062	56.1141
PTGER4	797.491	-1.07132	0.0939014	-11.409	3.77081e-30	6.74556e-28	6.74556e-28	1012.99	924.21	842.645	1214.35	1282.57	1177.8	438.894	524.824	504.252	598.039	470.421	578.911
ADTRP	2.81459	0.0993315	0.138474	0.717332	0.473169	NA	1	0	2.66599	9.76327	0	0	4.29539	0	5.30125	2.68696	2.41145	2.90982	3.74094
MZB1	903.898	1.12427	0.0989865	11.3578	6.78228e-30	1.19848e-27	1.19848e-27	531.268	572.299	536.98	490.471	542.99	579.019	1316.68	1265.67	1297.8	1042.95	1348.22	1322.42
AEBP2	1324.26	0.0490336	0.0677476	0.723768	0.469208	0.687722	0.687722	1318.54	1215.69	1204.64	1329.51	1291.29	1335.01	1411.76	1440.62	1388.26	1284.1	1300.69	1371.05
AEN	1435.46	-0.140183	0.070627	-1.98484	0.0471621	0.154262	0.154262	1877.33	1915.96	1755.89	1294.55	1234.21	1305.8	1427.23	1227.24	1549.48	1115.29	1390.89	1131.63
AFAP1	7.41481	0.117481	0.112489	1.04438	0.29631	NA	1	0	2.66599	21.0286	0	0	5.15447	0	1.32531	1.7913	38.5832	18.4289	0
AFAP1-AS1	6.67493	0.256687	0.142399	1.80259	0.0714519	NA	1	0	4.44332	22.5306	2.05648	0	0.859079	0	3.97594	0.895652	38.5832	5.81964	0.935235
AFAP1L1	4.69865	0.18248	0.118182	1.54406	0.122574	NA	1	0	1.77733	9.01225	0	0	3.43631	0	0	3.58261	33.7603	3.87976	0.935235
AFAP1L2	63.8362	0.473378	0.216302	2.1885	0.0286329	0.106355	0.106355	38.5376	36.4352	49.5674	56.5532	55.488	48.9675	78.4923	70.2416	62.6956	104.898	92.1443	72.0131
DCTN4	1181.6	-0.931019	0.0819847	-11.356	6.92385e-30	1.20875e-27	1.20875e-27	1611.7	1675.13	1535.84	1400.46	1331.71	1347.04	1146.43	748.802	977.156	642.651	1053.35	708.908
AFDN-DT	4.4143	0.00936897	0.126476	0.0740768	0.940949	NA	1	0	0	11.2653	3.08472	0.792686	3.43631	1.10553	0	4.47826	8.44007	20.3687	0
RAB11FIP4	577.613	1.08165	0.0956426	11.3093	1.1803e-29	2.03602e-27	2.03602e-27	478.967	481.655	473.143	354.743	337.684	286.073	844.622	731.573	778.322	705.349	765.283	693.945
MMP11	305.987	-1.48234	0.131573	-11.2663	1.92387e-29	3.27963e-27	3.27963e-27	412.902	432.779	394.286	528.516	505.734	482.802	142.613	149.76	159.426	170.007	112.513	180.5
CDK5R1	223.008	-1.64034	0.145839	-11.2476	2.37984e-29	4.00975e-27	4.00975e-27	353.72	327.028	283.135	377.364	406.648	337.618	86.231	98.0732	95.8348	110.927	87.2946	112.228
AFF4	2244.29	0.0407896	0.0817943	0.498686	0.618001	0.796424	0.796424	2500.81	2265.2	2133.65	2139.77	2026.9	1908.01	2721.8	2223.88	2360.04	1966.54	2621.75	2063.13
AFF4-DT	2.97301	0.162499	0.183786	0.884178	0.3766	NA	1	1.37634	0	0.751021	1.02824	2.37806	3.43631	6.63316	1.32531	2.68696	8.44007	3.87976	3.74094
DSE	385.44	-1.21281	0.109378	-11.0883	1.43014e-28	2.38192e-26	2.38192e-26	507.87	470.991	436.343	636.481	602.441	547.233	234.371	242.532	230.183	237.528	222.116	257.19
AFG3L1P	625.73	0.0638856	0.0929346	0.687425	0.491815	0.704677	0.704677	606.967	575.854	646.629	579.928	627.015	594.482	689.848	691.813	658.304	624.565	637.251	576.105
AFG3L2	2996.64	0.124264	0.0882035	1.40883	0.158886	0.360121	0.360121	2993.54	2938.81	2654.11	2990.12	3014.58	2846.99	3196.08	3471	3107.91	3005.87	2541.24	3199.44
AFG3L2P1	3.51416	-0.100491	0.193196	-0.520147	0.602961	NA	1	2.75268	3.55465	8.26123	6.16944	3.96343	3.43631	1.10553	2.65063	3.58261	4.8229	0	1.87047
AFM	0.56497	0.0664237	0.0583888	1.13761	0.255283	NA	1	0	0	0.751021	0	0	0	0	0	0	6.02862	0	0
AFMID	923.363	-0.20796	0.102147	-2.03589	0.0417611	0.141682	0.141682	860.214	883.331	1098.74	1008.7	1024.15	1150.31	728.542	918.442	790.861	950.111	794.381	872.574
AFP	0.367655	0	0.0580396	0	1	NA	1	0	0	1.50204	0	0	0	0	0	0	0	2.90982	0
AFTPH	894.098	0.161	0.0834729	1.92877	0.0537594	0.170156	0.170156	959.31	924.21	907.984	860.637	763.357	713.894	1038.09	885.309	978.948	830.744	966.06	900.632
AFTPH-DT	13.3443	0.252127	0.249585	1.01019	0.312406	NA	1	15.1398	8.88663	19.5265	11.3106	6.34149	4.29539	17.6884	5.30125	20.6	15.6744	21.3387	14.0285
IL2RB	174.596	-2.07586	0.187287	-11.0839	1.50203e-28	2.47322e-26	2.47322e-26	231.225	255.935	226.057	365.025	363.843	336.759	46.4321	67.591	24.1826	77.1663	50.4369	50.5027
AGA-DT	11.809	0.319297	0.247789	1.28859	0.197541	NA	1	8.25805	8.88663	5.25714	6.16944	6.34149	10.3089	13.2663	18.5544	20.6	18.0859	20.3687	5.61141
DAPP1	257.275	1.7695	0.160578	11.0195	3.07609e-28	5.00816e-26	5.00816e-26	108.731	105.751	93.8776	95.6263	86.4028	96.2168	530.652	441.329	467.53	332.78	387.976	340.426
AGAP10P	1.2223	0.0510458	0.128417	0.397501	0.690998	NA	1	0	0	2.25306	1.02824	0.792686	0.859079	3.31658	0	0.895652	3.61717	0.96994	0.935235
AGAP13P	18.5399	0.349989	0.253451	1.38089	0.167312	0.373322	0.373322	31.6559	22.2166	21.7796	9.25416	8.71955	12.0271	27.6381	14.5784	21.4956	16.8801	19.3988	16.8342
AGAP14P	1.70907	0.0251743	0.102032	0.24673	0.805117	NA	1	0	0	1.50204	0	0	6.87263	0	1.32531	0	6.02862	2.90982	1.87047
AGAP1-IT1	3.89151	-0.0677187	0.195995	-0.345513	0.729709	NA	1	6.88171	3.55465	6.75918	3.08472	2.37806	6.87263	1.10553	1.32531	2.68696	7.23435	3.87976	0.935235
AGAP2	1157.72	-0.11458	0.0868094	-1.3199	0.186867	0.400904	0.400904	1253.85	1204.14	1058.94	1232.86	1135.92	1114.22	1275.78	1092.06	1291.53	1035.72	1118.34	1079.26
AGAP2-AS1	0.646818	0.0321903	0.0663774	0.484959	0.627705	NA	1	1.37634	0	3.00408	0	0	0	0	0	0	2.41145	0.96994	0
AGAP3	17.1442	0.0810137	0.0850489	0.952554	0.340816	0.573219	0.573219	0	4.44332	31.5429	0	0	17.1816	0	0	2.68696	108.515	32.008	9.35235
AGAP4	113.918	0.0978309	0.162052	0.6037	0.546043	0.746257	0.746257	116.989	100.419	114.906	102.824	110.183	120.271	122.713	115.302	101.209	124.19	117.363	120.645
AGAP5	8.04845	0.0427295	0.23348	0.183011	0.854789	NA	1	6.88171	8.88663	3.7551	15.4236	3.96343	4.29539	6.63316	7.95188	12.5391	7.23435	8.72946	10.2876
AGAP6	40.6126	-0.0462355	0.233507	-0.198005	0.843041	0.926905	0.926905	28.9032	48.8765	42.8082	38.0449	41.2197	36.9404	56.3818	42.41	36.7217	30.1431	46.5571	38.3446
AGAP7P	42.9304	0.151095	0.235006	0.642942	0.520262	0.726612	0.726612	33.0322	45.3218	39.0531	35.9884	31.7074	59.2764	34.2713	45.0606	46.5739	47.0232	42.6774	55.1789
AGAP9	96.17	0.160375	0.190073	0.843758	0.398805	0.62928	0.62928	128	97.7529	95.3796	69.9203	65.7929	73.0217	143.718	78.1935	104.791	78.3721	137.731	81.3655
AGBL1	6.49663	0.309284	0.146564	2.11022	0.0348391	NA	1	1.37634	1.77733	15.7714	0	0	2.57724	1.10553	7.95188	1.7913	39.7889	5.81964	0
AGBL1-AS1	0.140521	0.0174606	0.0580207	0.300938	0.763461	NA	1	0	0	0.751021	0	0	0	0	0	0	0	0	0.935235
AGBL2	12.1261	-0.252906	0.204284	-1.23801	0.215713	NA	1	12.3871	13.3299	20.2776	16.4518	21.4025	20.6179	2.21105	1.32531	1.7913	24.1145	10.6693	0.935235
AGBL3	73.861	-0.231317	0.204745	-1.12978	0.258569	0.489633	0.489633	53.6773	67.5384	90.1225	73.0051	95.1223	79.8943	77.3868	68.9163	68.0696	72.3435	77.5952	62.6608
AGBL4	4.668	0.411055	0.183507	2.23999	0.0250915	NA	1	1.37634	2.66599	9.76327	1.02824	0.792686	1.71816	0	5.30125	3.58261	19.2916	5.81964	4.67618
AGBL4-AS1	0.427427	0.0179959	0.0595697	0.302098	0.762578	NA	1	0	0.888663	0	0	0	0.859079	0	0	0	2.41145	0.96994	0
AGBL4-IT1	0.582555	0.0247659	0.0586285	0.422421	0.672718	NA	1	0	0	0	0	0	0	0	0	0	1.20572	4.8497	0.935235
AGBL5	762.006	0.0632905	0.085651	0.738935	0.459946	0.68048	0.68048	697.805	686.048	739.755	768.095	795.064	816.984	763.918	844.224	733.539	770.458	653.74	874.445
AGBL5-AS1	1.39129	0.0332284	0.0728864	0.455893	0.648467	NA	1	0	0	3.00408	0	0	2.57724	0	0	0	7.23435	3.87976	0
AGBL5-IT1	0.888388	-0.00188483	0.0806879	-0.0233595	0.981364	NA	1	0	0.888663	0	0	0.792686	1.71816	0	0	0	2.41145	4.8497	0
AGER	183.775	-0.0813429	0.162706	-0.499937	0.617119	0.795557	0.795557	220.215	183.065	220.8	152.18	177.562	201.024	177.99	163.014	171.07	141.07	204.657	192.658
AGFG1	1586.01	0.144749	0.0697298	2.07586	0.0379069	0.131373	0.131373	1575.91	1511.62	1428.44	1564.98	1541.77	1461.29	1671.56	1830.26	1610.38	1573.47	1603.31	1659.11
AGFG2	297.2	-0.156247	0.136496	-1.1447	0.252333	0.482827	0.482827	341.333	278.152	287.641	337.263	332.928	307.55	310.653	318.075	273.174	274.905	226.966	277.765
TRO	233.275	1.81942	0.165146	11.017	3.16455e-28	5.09492e-26	5.09492e-26	83.9568	68.4271	81.8612	88.4287	94.3296	85.9079	432.261	442.655	332.287	305.048	403.495	380.641
AGGF1P1	4.93918	-0.0203109	0.214661	-0.0946183	0.924618	NA	1	4.12902	6.22064	2.25306	2.05648	6.34149	3.43631	11.0553	3.97594	7.16522	1.20572	5.81964	5.61141
AGGF1P10	0.988141	0.00914021	0.0815027	0.112146	0.910708	NA	1	1.37634	0	1.50204	0	0	1.71816	0	0	0	2.41145	4.8497	0
AGGF1P2	16.3939	-0.251397	0.254331	-0.988463	0.322926	0.556517	0.556517	24.7741	13.3299	12.0163	17.4801	19.8172	11.168	19.8995	13.2531	23.287	7.23435	22.3086	12.1581
AGGF1P3	7.78991	0.247314	0.243289	1.01655	0.30937	NA	1	6.88171	6.22064	9.01225	9.25416	3.17074	4.29539	8.84421	9.27719	8.06087	8.44007	10.6693	9.35235
AGGF1P6	0.426601	0.0426278	0.0580396	0.734459	0.462669	NA	1	0	0	1.50204	0	0	0	0	0	0	3.61717	0	0
AGGF1P7	0.12517	0	0.0580207	0	1	NA	1	0	0	1.50204	0	0	0	0	0	0	0	0	0
AGGF1P8	0.594474	0.00752851	0.0587325	0.128183	0.898004	NA	1	0	0	3.00408	0	0	1.71816	0	0	0	2.41145	0	0
AGK	188.289	-0.0319152	0.1603	-0.199097	0.842187	0.926738	0.926738	169.29	197.283	175.739	202.563	228.294	187.279	161.407	213.375	199.73	207.385	132.882	184.241
AGK-DT	0.94808	0.0386873	0.0700864	0.551995	0.580952	NA	1	0	0	3.7551	0	0	0.859079	0	0	0	4.8229	1.93988	0
AGKP2	0.872101	0.0172213	0.0950335	0.181213	0.856201	NA	1	0	2.66599	1.50204	1.02824	0.792686	0.859079	0	0	0	3.61717	0	0
AGL	601.554	-0.122047	0.143879	-0.848259	0.396293	0.627038	0.627038	593.203	595.404	566.269	689.949	706.283	594.482	692.059	703.741	499.774	583.571	463.631	530.278
AGMAT	4.26946	0.143199	0.130328	1.09875	0.271876	NA	1	0	1.77733	6.75918	1.02824	0	0.859079	0	0	6.26956	18.0859	15.519	0.935235
AGMO	0.684204	0.0344026	0.0670097	0.513398	0.607673	NA	1	0	0	0	0	0	1.71816	0	0	0	3.61717	1.93988	0.935235
ENC1	801.461	-1.21627	0.110653	-10.9918	4.18665e-28	6.66643e-26	6.66643e-26	1121.72	1061.95	979.331	1142.37	1133.54	1072.99	592.562	363.136	577.696	511.227	561.595	499.416
AGO2	3018.88	-0.106259	0.103522	-1.02644	0.304685	0.537791	0.537791	3747.78	3200.08	3458.45	3228.67	2813.24	2645.1	3001.5	2723.52	2663.67	2434.36	3429.71	2880.52
AGO3	884.689	0.023466	0.113582	0.206599	0.836323	0.923864	0.923864	1059.78	854.894	880.947	903.823	884.638	762.003	949.647	939.647	846.391	747.549	880.705	906.243
FAM169A	60.977	-2.61889	0.239423	-10.9384	7.55432e-28	1.18981e-25	1.18981e-25	108.731	116.415	97.6327	138.812	106.22	125.425	3.31658	3.97594	10.7478	10.8515	6.78958	2.80571
AGPAT1	1879.45	0.127652	0.0857371	1.48887	0.136521	0.324845	0.324845	1943.39	2080.36	1976.69	1380.93	1494.21	1504.25	2387.94	1612.91	2189.87	1563.82	2797.31	1621.7
AGPAT2	1070.99	-0.11053	0.0876982	-1.26035	0.207543	0.427477	0.427477	1132.73	1229.02	1061.19	1159.86	1122.44	1101.34	1017.08	1056.27	911.774	938.053	994.188	1127.89
POMC	87.7468	-2.72747	0.249493	-10.9321	8.09912e-28	1.26189e-25	1.26189e-25	156.903	178.621	230.563	124.417	146.647	204.461	0	0	0	8.44007	2.90982	0
AGPAT4	348.028	0.151918	0.121549	1.24985	0.211353	0.432068	0.432068	348.214	286.15	355.984	366.054	320.245	328.168	330.552	355.184	369.009	362.923	341.419	412.439
AGPAT5	2266.23	0.078916	0.120706	0.653787	0.513249	0.720987	0.720987	2244.81	2049.26	1828.74	2583.97	2578.61	2069.52	2353.66	2772.56	2116.43	2334.28	1704.18	2558.8
AGPS	2712.39	0.0800878	0.0612892	1.30672	0.191308	0.406133	0.406133	2778.83	2762.85	2610.55	2687.82	2628.55	2518.82	2902.01	2930.27	2729.95	2597.13	2639.21	2762.68
AGR2	0.24917	0.0174606	0.0580207	0.300938	0.763461	NA	1	0	0.888663	0	0	0	0	0	0	0.895652	1.20572	0	0
AGRN	315.695	0.0160204	0.127988	0.125171	0.900388	0.954488	0.954488	326.193	282.595	288.392	350.63	372.562	307.55	268.643	326.027	291.983	397.889	255.094	320.786
AGRP	1.9171	0.0894673	0.112369	0.796196	0.425918	NA	1	0	0.888663	9.76327	0	0	1.71816	1.10553	1.32531	0	7.23435	0.96994	0
AGT	7.60264	0.21687	0.152853	1.41881	0.155954	NA	1	4.12902	4.44332	21.0286	3.08472	0	5.15447	0	1.32531	3.58261	39.7889	7.75952	0.935235
AGTPBP1	882.17	0.139576	0.096772	1.44232	0.149213	0.344502	0.344502	880.859	865.558	777.306	892.513	848.967	748.257	997.184	866.755	966.409	897.059	861.307	983.867
AGTR1	2.12015	0.0435833	0.0995562	0.437776	0.661549	NA	1	0	0	6.00816	1.02824	0	2.57724	0	0	4.47826	8.44007	2.90982	0
AGTR2	0.530484	-0.00648353	0.0625105	-0.103719	0.917392	NA	1	0	0	1.50204	0	0	1.71816	0	0	0	1.20572	1.93988	0
VAMP5	81.8291	-2.52535	0.231654	-10.9014	1.13525e-27	1.74997e-25	1.74997e-25	150.021	170.623	123.167	141.897	169.635	167.52	4.4221	13.2531	5.37391	16.8801	12.6092	6.54665
AGXT	6.40983	0.105771	0.122721	0.861882	0.388753	NA	1	1.37634	2.66599	16.5225	0	0	7.73171	0	0	0.895652	26.5259	17.4589	3.74094
AGXT2	1.24734	-0.0112754	0.0626733	-0.179908	0.857225	NA	1	0	0	8.26123	0	0	4.29539	0	0	0	2.41145	0	0
AHCTF1	3055.84	0.0482052	0.069227	0.696335	0.486219	0.700678	0.700678	3165.59	3024.12	2894.43	3210.17	3163.61	2911.42	3023.61	3432.56	2764.88	2944.38	2904.97	3230.3
AHCTF1P1	25.4984	0.0698846	0.243416	0.287099	0.774037	0.89181	0.89181	27.5268	31.9919	20.2776	25.706	24.5733	26.6314	21.005	23.8556	20.6	27.7317	25.2184	30.8628
AHCY	3908.62	-0.106361	0.0734563	-1.44795	0.14763	0.341665	0.341665	3815.22	4287.8	3771.63	4172.6	4157.64	4213.78	3728.94	3802.32	3903.25	3836.61	3221.17	3992.52
AHCYL1	3310.65	-0.0680013	0.0599347	-1.13459	0.256547	0.487264	0.487264	3369.28	3440.01	3351.05	3435.35	3568.67	3320.34	2958.39	3168.82	3331.83	3178.29	3117.39	3488.43
AHCYL2	231.102	-0.0624765	0.135146	-0.462287	0.643875	0.813617	0.813617	260.129	207.947	201.274	213.874	211.647	237.106	290.753	213.375	258.843	201.356	259.944	216.975
AHCYP2	2.18143	-0.0366572	0.150236	-0.243998	0.807233	NA	1	0	2.66599	3.7551	1.02824	4.75612	2.57724	0	0	1.7913	4.8229	2.90982	1.87047
AHCYP3	1.22622	0.0632104	0.0641542	0.98529	0.324482	NA	1	0	0	3.00408	0	0	0.859079	0	0	0	10.8515	0	0
AHCYP4	1.87625	0.065437	0.087104	0.751252	0.452501	NA	1	0	0.888663	2.25306	0	0	3.43631	0	0	0	12.0572	3.87976	0
AHCYP5	0.507429	0.0413592	0.0582691	0.709796	0.477831	NA	1	0	0	1.50204	0	0	0	0	0	0	3.61717	0.96994	0
AHCYP7	0.7613	0.0253205	0.0924865	0.273775	0.784258	NA	1	0	0.888663	1.50204	0	0	0.859079	1.10553	0	0	0	2.90982	1.87047
ENSG00000201592	491.545	-1.24555	0.114307	-10.8965	1.19794e-27	1.82717e-25	1.82717e-25	660.644	649.613	668.408	762.954	660.307	695.854	357.085	294.22	272.278	256.819	322.02	298.34
AHI1	432.819	0.0719668	0.107949	0.666675	0.50498	0.714481	0.714481	421.161	358.131	395.037	429.804	435.977	448.439	415.678	522.173	464.843	425.621	436.473	440.496
AHI1-DT	13.2107	0.328161	0.239603	1.36961	0.17081	NA	1	9.63439	10.664	15.0204	3.08472	7.13417	15.4634	8.84421	17.2291	7.16522	19.2916	29.0982	15.899
AHNAK	87.3995	-0.234664	0.211284	-1.11066	0.266716	0.498161	0.498161	114.236	90.6436	122.416	94.5981	72.1344	86.7669	84.02	59.6391	65.3826	77.1663	114.453	67.3369
AHNAK2	18.8013	0.110409	0.110857	0.995964	0.319268	0.553571	0.553571	0	13.3299	66.8408	1.02824	0.792686	10.3089	0	0	4.47826	85.6064	32.008	11.2228
CD300A	195.527	1.66932	0.153342	10.8863	1.34046e-27	2.02326e-25	2.02326e-25	63.3117	61.3178	64.5878	101.796	103.049	127.144	187.939	402.895	214.061	346.043	231.816	442.366
CHST15	1098.29	-1.08856	0.100054	-10.8797	1.4402e-27	2.1514e-25	2.1514e-25	1524.99	1571.16	1393.14	1726.42	1726.47	1585.86	423.416	677.235	516.791	787.338	418.044	828.618
AHSA1	5404.72	-0.112199	0.0561244	-1.99911	0.0455968	0.150535	0.150535	5153.02	5501.71	5118.96	5905.18	6118.74	6055.64	4719.49	5640.53	5137.46	5519.81	4432.63	5553.43
AHSA2P	992.859	0.0685533	0.113592	0.603504	0.546174	0.746257	0.746257	1065.29	852.228	864.425	840.072	942.504	949.282	1314.47	1035.07	1187.63	898.265	1023.29	941.782
AHSG	2.18269	0.0927085	0.107882	0.859348	0.390148	NA	1	2.75268	0	11.2653	0	0	0.859079	0	0	0	8.44007	1.93988	0.935235
AHSP	0.560776	0.0300224	0.0585434	0.512823	0.608075	NA	1	0	0	2.25306	0	0	0.859079	0	0	0	3.61717	0	0
AICDA	2.16634	0.0333564	0.10158	0.328376	0.742627	NA	1	0	0.888663	12.7673	0	0	3.43631	0	0	0	6.02862	1.93988	0.935235
AIDA	672.404	0.0182392	0.0938903	0.194261	0.845972	0.927812	0.927812	754.235	721.594	663.151	614.888	638.905	562.696	718.592	666.633	764.887	571.513	787.591	604.162
AIDAP1	2.35276	-0.0777237	0.178216	-0.43612	0.66275	NA	1	1.37634	5.33198	4.50612	2.05648	3.17074	1.71816	2.21105	1.32531	1.7913	0	1.93988	2.80571
AIDAP2	3.25686	0.0426091	0.183789	0.231837	0.816665	NA	1	2.75268	1.77733	3.7551	4.11296	3.17074	1.71816	3.31658	2.65063	4.47826	8.44007	2.90982	0
AIF1	52.4717	-0.122083	0.237907	-0.513154	0.607844	0.788904	0.788904	44.0429	54.2084	51.8204	59.6379	62.6222	72.1626	18.7939	43.7353	42.0956	62.6977	52.3768	65.4665
AIF1L	5.61789	0.2283	0.151616	1.50577	0.132126	NA	1	0	1.77733	19.5265	0	0.792686	0.859079	1.10553	1.32531	5.37391	24.1145	10.6693	1.87047
AIFM1	1385.33	-0.108901	0.0583575	-1.8661	0.0620268	0.188224	0.188224	1336.43	1374.76	1327.05	1534.13	1512.44	1530.88	1210.55	1383.63	1319.3	1382.97	1243.46	1468.32
AIFM1P1	0.537143	0.0410115	0.0583765	0.702535	0.482346	NA	1	0	0.888663	0	0	0	0	0	0	0	3.61717	1.93988	0
SORBS1	692.886	-1.37126	0.126327	-10.8549	1.89096e-27	2.79592e-25	2.79592e-25	967.568	1005.97	923.755	1024.13	1100.25	975.054	412.361	384.341	471.113	395.478	312.321	342.296
AIFM3	9.58529	0.188444	0.142997	1.31782	0.187564	NA	1	0	4.44332	20.2776	1.02824	0.792686	7.73171	1.10553	0	1.7913	47.0232	25.2184	5.61141
AIG1	188.039	-0.0179713	0.148984	-0.120626	0.903987	0.956324	0.956324	144.516	141.297	168.229	204.62	202.928	208.756	198.995	209.399	207.791	229.088	168.77	172.083
AIM2	2.05148	0.139159	0.152774	0.910881	0.362358	NA	1	0	1.77733	4.50612	1.02824	3.17074	0.859079	0	2.65063	1.7913	6.02862	0	2.80571
AIMP1	1584.51	-0.00297615	0.0778253	-0.0382414	0.969495	0.986239	0.986239	1527.74	1638.69	1568.13	1567.04	1590.13	1668.33	1481.4	1550.62	1724.13	1568.65	1436.48	1692.78
AIMP2	488.249	0.00745056	0.0947606	0.0786252	0.937331	0.970276	0.970276	476.214	476.323	457.372	538.798	516.039	497.406	461.004	563.258	464.843	485.907	409.315	512.509
AIP	1694.96	-0.177806	0.0839018	-2.11921	0.0340723	0.121005	0.121005	1769.98	1963.06	1729.6	1661.64	1731.23	1963.85	1534.47	1513.51	1714.28	1663.9	1550.93	1543.14
AIPL1	3.35809	0.133745	0.121029	1.10506	0.269134	NA	1	1.37634	3.55465	8.26123	0	0	1.71816	0	0	2.68696	16.8801	5.81964	0
AIRE	5.96378	0.148664	0.136687	1.08763	0.276759	NA	1	0	4.44332	23.2816	0	0.792686	1.71816	1.10553	0	0.895652	22.9088	14.5491	1.87047
AIRN	2.39437	0.164572	0.113863	1.44535	0.148359	NA	1	0	2.66599	6.75918	1.02824	0	0	0	0	0	14.4687	1.93988	1.87047
AJAP1	6.64678	0.0800666	0.100932	0.793271	0.42762	NA	1	0	1.77733	17.2735	0	0	8.59079	0	0	0	33.7603	16.489	1.87047
PTEN	3773.16	1.09348	0.101447	10.7789	4.33082e-27	6.33875e-25	6.33875e-25	2368.68	2176.34	2165.94	2538.73	2485.07	2387.38	5745.42	6130.9	4836.52	5166.53	4230.88	5045.59
AJUBA	180.225	0.201784	0.171613	1.17581	0.239671	0.468633	0.468633	178.924	157.293	154.71	210.789	168.842	176.111	120.502	178.917	175.548	220.648	170.709	249.708
AJUBA-DT	32.9958	-0.421877	0.250563	-1.68371	0.0922368	0.248839	0.248839	34.4085	37.3238	42.8082	29.819	43.5977	42.9539	24.3216	9.27719	36.7217	28.9374	34.9178	30.8628
AK1	52.9928	-0.443107	0.217648	-2.03589	0.0417615	0.141682	0.141682	53.6773	71.093	78.1061	69.9203	60.2441	60.9946	29.8492	43.7353	46.5739	44.6118	37.8277	39.2799
AK2	6025.85	0.0659968	0.0950484	0.69435	0.487463	0.701772	0.701772	5954.05	5903.39	5191.05	6672.25	6820.27	6014.41	5366.22	6843.92	5705.3	6799.08	4227.97	6812.25
AK2P2	1.11627	-0.0545279	0.108173	-0.504083	0.614203	NA	1	1.37634	0	3.7551	1.02824	0.792686	0.859079	1.10553	0	4.47826	0	0	0
AK3	1237.07	-0.103218	0.0631494	-1.63451	0.102152	0.267036	0.267036	1190.54	1282.34	1203.13	1235.94	1278.6	1168.35	1370.85	1137.12	1370.35	1141.82	1320.09	1145.66
AK3P2	0.509661	0.0339631	0.0620017	0.547776	0.583846	NA	1	0	0.888663	0.751021	0	0	0.859079	0	0	0	3.61717	0	0
AK3P3	3.27562	0.171312	0.194387	0.881294	0.378159	NA	1	2.75268	0.888663	1.50204	2.05648	4.75612	2.57724	1.10553	9.27719	3.58261	6.02862	2.90982	1.87047
AK3P4	0.62615	0.0500095	0.0587937	0.850592	0.394996	NA	1	0	0	0.751021	0	0	0	0	0	0	4.8229	1.93988	0
AK3P5	0.12517	0	0.0580207	0	1	NA	1	0	0	1.50204	0	0	0	0	0	0	0	0	0
AK4	601.527	-0.134515	0.17174	-0.783246	0.433482	0.656704	0.656704	604.214	544.75	512.196	718.74	730.064	727.64	503.014	736.874	594.713	716.2	323.96	505.962
AK4P1	2.92431	0.21366	0.171882	1.24307	0.213843	NA	1	0	3.55465	4.50612	0	2.37806	0	4.4221	5.30125	2.68696	3.61717	5.81964	2.80571
AK4P2	0.12517	0	0.0580207	0	1	NA	1	0	0	1.50204	0	0	0	0	0	0	0	0	0
AK4P3	3.52486	-0.0355934	0.186688	-0.190657	0.848794	NA	1	4.12902	4.44332	9.76327	3.08472	1.58537	4.29539	1.10553	2.65063	4.47826	4.8229	1.93988	0
AK4P4	0.837946	-0.0161531	0.0907896	-0.177918	0.858787	NA	1	0	0	1.50204	0	3.17074	0	1.10553	0	0.895652	2.41145	0.96994	0
AK4P6	0.35456	0	0.0580207	0	1	NA	1	2.75268	0	1.50204	0	0	0	0	0	0	0	0	0
RAB15	1262.27	-1.34079	0.124675	-10.7543	5.65475e-27	8.1126e-25	8.1126e-25	1732.81	1813.76	2079.58	1676.03	1662.26	2065.22	623.517	641.452	695.922	589.599	800.2	766.893
AK6	368.505	0.0222702	0.152952	0.145603	0.884235	0.94689	0.94689	327.569	363.463	403.298	385.59	321.831	376.276	305.125	314.099	379.756	382.215	459.752	403.086
AK6P1	0.402147	0.0180913	0.0587767	0.307797	0.758237	NA	1	0	0	1.50204	0	0.792686	0	0	1.32531	0	1.20572	0	0
AK6P2	0.399585	0.0255777	0.0705833	0.362376	0.717071	NA	1	0	0.888663	0	0	0	0	1.10553	0	0.895652	0	0.96994	0.935235
AK7	10.4633	0.220149	0.237174	0.928216	0.353296	NA	1	6.88171	13.3299	16.5225	7.19768	5.5488	12.0271	2.21105	6.62657	13.4348	18.0859	8.72946	14.9638
AK8	7.20127	0.189479	0.160559	1.18012	0.237952	NA	1	0	6.22064	14.2694	4.11296	2.37806	4.29539	0	3.97594	6.26956	31.3488	12.6092	0.935235
AK9	117.721	-0.247081	0.193838	-1.27468	0.202423	0.420699	0.420699	115.613	91.5323	148.702	127.502	108.598	144.325	130.452	91.4466	107.478	116.955	129.972	100.07
AKAIN1	0.993558	0.0130651	0.106885	0.122235	0.902713	NA	1	0	0.888663	3.00408	1.02824	0	0.859079	0	0	1.7913	2.41145	1.93988	0
AKAP1	3057.92	-0.00184783	0.0550354	-0.0335754	0.973216	0.987929	0.987929	2992.17	3041.89	3067.17	3108.37	3242.88	3239.59	2772.66	3322.56	2980.73	3039.63	2667.33	3220.01
AKAP10	656.559	0.1418	0.116186	1.22046	0.222292	0.446987	0.446987	635.87	591.85	554.253	653.961	645.246	532.629	849.044	730.248	707.565	667.971	674.108	635.96
XIST	9319.44	1.32425	0.123127	10.7552	5.60136e-27	8.1126e-25	8.1126e-25	5067.69	3951.88	5055.12	5398.26	4495.32	4739.54	12724.6	12772	13285.2	12182.6	18167.9	13993
AKAP12	5.46191	0.0946186	0.137672	0.687274	0.49191	NA	1	1.37634	1.77733	21.7796	0	0	5.15447	1.10553	1.32531	0.895652	15.6744	15.519	0.935235
AKAP13	1767.54	-0.034002	0.11584	-0.293525	0.769121	0.889403	0.889403	2001.2	1785.32	1885.06	1436.45	1351.53	1321.26	2689.74	1448.57	1948.94	1233.46	2783.73	1325.23
AKAP13-AS1	0.200954	0.0301218	0.0580207	0.519156	0.603652	NA	1	0	0	0	0	0	0	0	0	0	2.41145	0	0
AKAP14	0.863879	-0.0612012	0.0999466	-0.612339	0.540313	NA	1	0	0	0	1.02824	1.58537	3.43631	0	0	0	2.41145	0.96994	0.935235
AKAP17BP	0.641259	0.0163358	0.0655218	0.249318	0.803115	NA	1	0	0.888663	0.751021	0	0	0	0	0	0	1.20572	4.8497	0
AKAP1-DT	58.7247	0.212729	0.206075	1.03229	0.301937	0.534779	0.534779	46.7956	58.6518	60.8327	46.2708	49.9392	52.4038	61.9095	58.3138	82.4	65.1091	65.9559	56.1141
AKAP3	77.173	0.067688	0.198833	0.340427	0.733535	0.869157	0.869157	78.4515	66.6497	78.8572	79.1745	73.7198	63.5718	97.2863	82.1694	68.9652	84.4007	89.2345	63.596
AKAP4	0.163062	0.0174606	0.0580207	0.300938	0.763461	NA	1	0	0	0.751021	0	0	0	0	0	0	1.20572	0	0
RPP30	534.63	-1.14194	0.106212	-10.7515	5.83139e-27	8.28401e-25	8.28401e-25	714.321	701.155	615.086	804.084	761.771	871.965	287.437	327.352	317.061	349.66	281.283	384.382
AKAP6	76.5938	0.484013	0.221522	2.18494	0.028893	0.107047	0.107047	55.0537	40.8785	56.3265	57.5815	44.3904	46.3902	168.04	72.8922	98.5217	95.2522	118.333	65.4665
AKAP7	102.095	0.346714	0.178885	1.9382	0.0525993	0.167211	0.167211	83.9568	83.5343	87.8694	75.0615	99.0858	97.935	119.397	128.555	123.6	121.778	92.1443	112.228
AKAP8	1392.84	-0.032912	0.0668655	-0.492212	0.62257	0.79995	0.79995	1501.59	1427.19	1405.91	1448.79	1331.71	1433.8	1376.38	1415.43	1407.96	1361.26	1262.86	1341.13
AKR1B1	5918.43	-0.618227	0.0575424	-10.7438	6.33495e-27	8.91198e-25	8.91198e-25	8827.86	9737.97	8800.46	4652.79	4765.63	4936.27	6955.97	3154.25	6338.53	2979.34	6710.04	3162.03
AKAP8P1	0.30929	0.0047995	0.0580207	0.0827205	0.934074	NA	1	0	0	0.751021	0	0	0.859079	0	0	0.895652	1.20572	0	0
AKAP9	2153.16	0.0667052	0.0819668	0.813808	0.415755	0.642577	0.642577	2118.19	1967.5	2184.72	2100.69	1968.24	1956.98	2385.72	2333.88	2231.96	1962.92	2602.35	2024.78
AKIP1	310.212	0.0137998	0.109963	0.125495	0.900131	0.954488	0.954488	291.784	315.475	282.384	308.472	296.465	296.382	329.447	284.942	368.113	309.871	325.9	313.304
AKIRIN1	1262.92	0.116938	0.0944125	1.23859	0.215497	0.437517	0.437517	1116.21	1181.92	1033.4	1371.67	1269.88	1194.98	1276.88	1408.81	1422.3	1341.97	1117.37	1419.69
AKIRIN1P1	0.200954	0.0301218	0.0580207	0.519156	0.603652	NA	1	0	0	0	0	0	0	0	0	0	2.41145	0	0
AKIRIN1P2	1.37973	0.046696	0.109737	0.425526	0.670453	NA	1	1.37634	0.888663	1.50204	0	0	1.71816	0	0	0	2.41145	6.78958	1.87047
AKIRIN2	807.976	0.0178225	0.0762369	0.233777	0.815158	0.913639	0.913639	834.063	784.689	829.878	786.604	814.881	824.715	809.245	807.116	830.269	829.538	723.575	821.137
AKNA	3916.9	-0.0981049	0.099362	-0.987348	0.323472	0.556848	0.556848	4244.64	4360.67	4142.63	3550.51	3812.03	3858.98	4084.92	3498.83	3716.06	3010.69	4781.8	3941.08
AKNAD1	2.9047	0.0738357	0.159706	0.462324	0.643849	NA	1	1.37634	0.888663	5.25714	3.08472	0.792686	3.43631	0	1.32531	0.895652	7.23435	7.75952	2.80571
ARID5B	1250.12	-1.01019	0.0942809	-10.7147	8.68566e-27	1.21015e-24	1.21015e-24	1754.84	1671.58	1768.65	1681.17	1700.31	1706.13	683.215	699.765	750.556	852.447	829.299	903.437
KLHL6	671.727	1.01689	0.0951707	10.685	1.19706e-26	1.63635e-24	1.63635e-24	393.634	472.769	422.825	371.195	419.331	383.149	1094.47	877.357	1019.25	777.692	1037.84	791.209
AKR1B10	1.25782	0.105778	0.111929	0.945046	0.344635	NA	1	1.37634	0	3.7551	0	0	0.859079	0	2.65063	0.895652	3.61717	1.93988	0
AKR1B10P1	0.25034	0	0.0580207	0	1	NA	1	0	0	3.00408	0	0	0	0	0	0	0	0	0
AKR1B10P2	0.12517	0	0.0580207	0	1	NA	1	0	0	1.50204	0	0	0	0	0	0	0	0	0
AKR1B15	0.989488	0.0882032	0.0841644	1.04799	0.294645	NA	1	0	0	0.751021	0	0	0.859079	0	1.32531	0	6.02862	2.90982	0
AKR1B1P1	1.83041	-0.0796203	0.16747	-0.475429	0.634481	NA	1	1.37634	1.77733	2.25306	1.02824	2.37806	2.57724	2.21105	1.32531	2.68696	2.41145	1.93988	0
AKR1B1P2	2.05322	0.110351	0.154909	0.712361	0.476241	NA	1	2.75268	0	0.751021	2.05648	2.37806	0	1.10553	1.32531	1.7913	4.8229	4.8497	2.80571
AKR1B1P3	0.639586	0.0626018	0.0670993	0.932972	0.350835	NA	1	0	0.888663	0	1.02824	0	0	0	0	0	4.8229	0	0.935235
AKR1B1P4	0.830662	0.0562993	0.0596065	0.944517	0.344906	NA	1	0	0	3.00408	0	0	0	0	0	0	6.02862	0	0.935235
AKR1B1P5	0.424456	0.0285991	0.0581818	0.491547	0.62304	NA	1	0	0	2.25306	0	0	0	0	0	0	0	0.96994	1.87047
AKR1B1P6	0.625826	0.0376935	0.0588088	0.640951	0.521555	NA	1	0	0.888663	3.00408	0	0	0	0	0	0	3.61717	0	0
AKR1B1P7	1.70256	0.0484344	0.135565	0.357279	0.720883	NA	1	0	2.66599	3.7551	3.08472	0.792686	0	1.10553	3.97594	0	1.20572	2.90982	0.935235
AKR1C1	1.37598	0.102189	0.0788968	1.29523	0.195242	NA	1	0	0	3.7551	0	0	0	0	0	0	10.8515	0.96994	0.935235
AKR1C2	1.4028	0.0989734	0.0969393	1.02098	0.307263	NA	1	0	0.888663	1.50204	1.02824	0	0.859079	0	0	0	9.64579	2.90982	0
AKR1C3	23.9934	-0.0236139	0.253335	-0.0932123	0.925735	0.964857	0.964857	19.2688	25.7712	22.5306	32.9037	28.5367	23.1951	17.6884	13.2531	24.1826	53.0519	11.6393	15.899
AKR1C4	0.433877	0.00474686	0.060785	0.0780926	0.937754	NA	1	0	0.888663	2.25306	0	0	0.859079	0	0	0	1.20572	0	0
AKR1C5P	0.397714	0.0172544	0.0580458	0.297256	0.766271	NA	1	0	0	1.50204	0	0	0.859079	0	0	0	2.41145	0	0
AKR1C6P	5.17649	0.176008	0.207428	0.848525	0.396145	NA	1	2.75268	0.888663	3.7551	3.08472	6.34149	6.01355	2.21105	3.97594	4.47826	18.0859	6.78958	3.74094
AKR1C7P	0.175115	0.0174606	0.0580207	0.300938	0.763461	NA	1	0	0	0	0	0	0	0	0	0.895652	1.20572	0	0
AKR1C8	0.143413	0	0.0580207	0	1	NA	1	0	0	0.751021	0	0	0	0	0	0	0	0.96994	0
AKR1D1	1.79794	0.217052	0.154028	1.40918	0.158783	NA	1	2.75268	0.888663	3.7551	0	0	0.859079	1.10553	2.65063	0.895652	4.8229	2.90982	0.935235
AKR1E2	3.73565	0.162974	0.119919	1.35903	0.174137	NA	1	0	3.55465	12.0163	0	0	2.57724	0	0	0.895652	22.9088	1.93988	0.935235
UBE2J1	1839.09	0.711156	0.0665518	10.6857	1.18687e-26	1.63635e-24	1.63635e-24	1267.61	1368.54	1310.53	1544.42	1506.1	1545.48	2005.42	2608.22	1965.96	2290.88	1970.92	2685.06
AKR7A2P1	0.43024	0	0.0581781	0	1	NA	1	0	0	2.25306	0	0	0	0	0	0	0	2.90982	0
AKR7A2P2	1.7093	0.0768444	0.0811925	0.946446	0.343921	NA	1	0	0	8.26123	0	0	0	0	0	0	8.44007	1.93988	1.87047
AKR7A3	23.4105	0.163454	0.244915	0.667392	0.504522	0.714273	0.714273	16.5161	13.3299	20.2776	22.6213	30.9148	26.6314	15.4774	34.4581	20.6	28.9374	18.4289	32.7332
AKR7L	39.082	0.213597	0.248486	0.859592	0.390014	0.621432	0.621432	41.2902	31.9919	41.3061	49.3555	24.5733	42.0948	35.3768	66.2657	18.8087	36.1717	36.8577	44.8913
AKT1	3922.89	-0.1529	0.0736523	-2.07597	0.0378966	0.131369	0.131369	4175.82	4233.59	3829.45	4154.09	4420.02	3881.32	3819.59	3835.46	3965.95	3505.04	3418.07	3836.33
AKT1S1	892.571	0.00566105	0.0968783	0.0584346	0.953402	0.978712	0.978712	902.88	988.193	848.653	822.592	922.687	847.911	896.582	812.417	1027.31	875.356	851.607	914.66
FUNDC1	42.0561	-2.62543	0.246123	-10.6672	1.44998e-26	1.96357e-24	1.96357e-24	85.3332	79.091	75.8531	85.3439	95.915	74.7398	0	0	0	3.61717	2.90982	1.87047
SLC16A2	355.045	-1.94358	0.183399	-10.5976	3.05849e-26	4.10347e-24	4.10347e-24	679.913	765.139	746.514	432.889	398.721	377.135	288.542	70.2416	145.991	78.3721	190.108	86.9769
AKT3-IT1	1.10876	0.0879203	0.124568	0.705799	0.480313	NA	1	0	0	0	1.02824	1.58537	1.71816	1.10553	2.65063	0	2.41145	0	2.80571
AKTIP	84.9842	-0.214916	0.183175	-1.17329	0.240681	0.469887	0.469887	83.9568	84.423	66.8408	90.4851	87.9881	82.4715	114.975	72.8922	92.2522	73.5492	97.9639	72.0131
DYNC1I2	1648	0.794849	0.0752441	10.5636	4.3946e-26	5.84199e-24	5.84199e-24	1096.94	1168.59	1245.94	1032.35	1208.05	1151.17	2266.33	1989.3	2441.55	1977.39	2198.85	1999.53
ALAS1	1213.87	-0.00773221	0.0814633	-0.0949166	0.924381	0.964382	0.964382	1233.2	1232.58	1221.91	1227.72	1254.03	1158.04	1192.86	1248.44	1207.34	1051.39	1223.09	1315.88
ALAS2	1.83777	0.162076	0.122018	1.3283	0.184079	NA	1	1.37634	0	2.25306	0	0.792686	0.859079	1.10553	0	0	10.8515	3.87976	0.935235
ALB	4.86912	0.224657	0.209531	1.07219	0.283633	NA	1	5.50537	3.55465	4.50612	2.05648	0.792686	1.71816	8.84421	1.32531	4.47826	3.61717	14.5491	7.48188
ALCAM	1019.35	-0.255311	0.120447	-2.11969	0.0340318	0.120922	0.120922	807.913	821.125	692.441	1395.32	1380.07	1288.62	964.019	1267	731.748	953.728	781.772	1148.47
ALDH16A1	732.959	-0.150886	0.0984964	-1.53189	0.125549	0.307299	0.307299	711.569	764.25	663.151	743.418	768.113	786.916	830.25	772.658	736.226	629.388	726.485	663.082
ALDH18A1	1998.63	-0.0713617	0.106927	-0.667385	0.504526	0.714273	0.714273	1928.25	1931.95	1602.68	2326.91	2299.58	2139.96	1920.3	2328.58	1929.23	2012.35	1478.19	2085.57
ITGAL	1753.81	1.71094	0.162621	10.5211	6.90963e-26	9.10187e-24	9.10187e-24	434.924	476.323	496.425	922.332	1030.49	1101.34	2028.64	4826.79	1296.01	2765.93	1671.21	3995.32
ALDH1A2	13.2255	0.110807	0.24942	0.444258	0.656856	NA	1	12.3871	8.88663	25.5347	12.3389	14.2683	15.4634	3.31658	10.6025	7.16522	24.1145	8.72946	15.899
ALDH1A2-AS1	1.40721	0.0297017	0.086998	0.341406	0.732798	NA	1	0	0	3.7551	0	0	0.859079	0	0	0.895652	3.61717	7.75952	0
ALDH1A3	8.12837	0.409159	0.199658	2.0493	0.0404329	NA	1	0	6.22064	14.2694	0	1.58537	4.29539	8.84421	9.27719	10.7478	24.1145	11.6393	6.54665
NRP1	455.064	-1.27681	0.12157	-10.5027	8.39456e-26	1.09583e-23	1.09583e-23	361.978	375.904	343.216	332.122	321.038	318.718	1028.14	103.374	942.226	122.984	1069.84	141.221
ALDH1B1	960.216	-0.120548	0.0942101	-1.27957	0.200698	0.418373	0.418373	1017.12	927.764	863.674	1049.83	1138.3	1096.18	799.295	936.996	892.965	1057.42	725.515	1017.54
ALDH1L1	14.5749	0.0832103	0.101003	0.823839	0.410031	NA	1	0	12.4413	46.5633	2.05648	0	11.168	0	0	4.47826	71.1377	24.2485	2.80571
ALDH1L1-AS1	0.976644	0.035625	0.0614819	0.579438	0.562293	NA	1	0	0.888663	6.00816	0	0	0	0	0	0	4.8229	0	0
ALDH1L1-AS2	2.96732	0.161862	0.113531	1.42571	0.153953	NA	1	1.37634	0.888663	5.25714	0	0	2.57724	0	0	0.895652	21.703	2.90982	0
ALDH1L2	7.57196	0.13219	0.193912	0.6817	0.495429	NA	1	6.88171	6.22064	12.0163	4.11296	3.17074	7.73171	9.94973	0	1.7913	21.703	12.6092	4.67618
ALDH2	13.9325	0.453034	0.237781	1.90526	0.0567469	NA	1	5.50537	14.2186	22.5306	4.11296	6.34149	14.6043	7.73868	15.9038	11.6435	39.7889	13.5792	11.2228
ALDH3A1	5.0746	0.121823	0.125385	0.971597	0.331251	NA	1	1.37634	3.55465	16.5225	0	0.792686	3.43631	0	0	0	21.703	11.6393	1.87047
MLC1	1860.45	-1.41046	0.134499	-10.4868	9.93378e-26	1.28518e-23	1.28518e-23	2846.27	2870.38	2417.54	2674.45	2721.29	2317.79	1232.66	853.502	1542.31	1039.33	1025.23	784.662
MARK4	1130.8	-0.683153	0.0652043	-10.4771	1.10054e-25	1.41123e-23	1.41123e-23	1317.16	1272.57	1321.8	1410.75	1423.66	1361.64	935.275	807.116	946.704	892.236	992.249	888.473
ALDH3B2	6.72722	0.183829	0.12081	1.52164	0.1281	NA	1	1.37634	2.66599	19.5265	0	0	1.71816	0	0	0	40.9946	11.6393	2.80571
TEX15	757.076	-1.01753	0.0971982	-10.4686	1.20389e-25	1.53021e-23	1.53021e-23	974.45	926.876	967.314	1293.53	1210.43	1105.63	270.854	641.452	318.852	534.136	278.373	563.012
ALDH5A1	893.531	0.179761	0.109779	1.63747	0.101532	0.266218	0.266218	677.16	666.497	733.747	981.969	917.138	906.328	952.963	1171.58	959.243	982.665	728.425	1044.66
ALDH6A1	522.152	-0.0458586	0.104859	-0.437334	0.661869	0.8234	0.8234	511.999	477.212	501.682	471.962	536.648	478.507	650.049	433.377	642.182	483.495	559.655	519.056
LGALS9	647.304	1.48903	0.142558	10.4451	1.54286e-25	1.94401e-23	1.94401e-23	243.612	206.17	256.849	382.505	406.648	383.149	851.255	1428.69	816.835	1114.09	602.333	1075.52
ALDH7A1P1	1.4611	0.0637844	0.141362	0.451214	0.651835	NA	1	1.37634	0	0.751021	2.05648	1.58537	0.859079	1.10553	0	0.895652	6.02862	1.93988	0.935235
ALDH8A1	4.83457	0.167211	0.188359	0.887722	0.37469	NA	1	4.12902	1.77733	13.5184	1.02824	3.17074	1.71816	3.31658	1.32531	5.37391	12.0572	8.72946	1.87047
ALDH9A1	1091.67	-0.118149	0.113533	-1.04066	0.298031	0.531243	0.531243	1227.7	1126.82	982.335	1235.94	1252.44	1060.1	1130.95	1118.56	948.495	995.928	881.675	1139.12
MYADM	1953.05	0.693161	0.066638	10.4019	2.43052e-25	3.03606e-23	3.03606e-23	1553.89	1622.7	1523.82	1289.41	1453.79	1487.92	2457.58	2243.76	2564.25	2423.51	2574.22	2241.76
ALDOAP1	1.8465	0.102516	0.104171	0.984117	0.325058	NA	1	0	2.66599	6.00816	0	0.792686	0	1.10553	0	0	9.64579	1.93988	0
ALDOAP2	2.08055	0.0412232	0.117131	0.351941	0.724883	NA	1	0	3.55465	5.25714	2.05648	1.58537	0	0	0	0	4.8229	5.81964	1.87047
ALDOB	0.896139	0.0454266	0.0598163	0.759435	0.447592	NA	1	0	0	3.7551	0	0	0	0	0	0	6.02862	0.96994	0
CD52	514.123	1.23602	0.119094	10.3786	3.104e-25	3.84419e-23	3.84419e-23	396.386	394.566	424.327	167.603	161.708	217.347	1007.13	481.089	977.156	413.563	1057.23	471.359
TMEM154	400.766	1.19161	0.114974	10.3641	3.61048e-25	4.43355e-23	4.43355e-23	254.623	263.933	242.58	207.705	234.635	200.165	677.687	539.402	596.504	465.41	589.723	536.825
CDT1	2642.26	-0.801099	0.0777792	-10.2997	7.07113e-25	8.61014e-23	8.61014e-23	3374.79	3644.41	3046.89	3555.65	3686.78	3456.07	1685.93	2113.87	1652.48	1843.55	1547.05	2099.6
SEPTIN6	6919.19	-0.904703	0.0879485	-10.2867	8.08755e-25	9.76572e-23	9.76572e-23	7474.91	8274.34	8838.76	9254.16	9555.04	10913.7	4118.08	5363.54	4413.77	4613.1	4624.67	5586.16
ALG11	284.597	0.0863054	0.119344	0.723163	0.46958	0.688059	0.688059	313.806	262.156	297.404	290.992	270.306	241.401	305.125	287.593	288.4	276.111	291.952	289.923
ADGRA2	332.196	-1.53437	0.14938	-10.2716	9.45954e-25	1.1328e-22	1.1328e-22	560.171	563.412	558.008	487.386	531.1	443.285	126.03	155.062	99.4174	142.275	166.83	153.379
ALG13	729.443	0.110009	0.0946464	1.16232	0.245105	0.474683	0.474683	633.117	738.479	702.204	646.763	686.466	696.713	784.923	823.019	835.643	671.588	827.359	707.038
ALG13-AS1	0.262134	0.0174606	0.0580207	0.300938	0.763461	NA	1	0	0	0	0	0	0	0	0	0	1.20572	1.93988	0
ALG14	122.346	-0.0653973	0.180039	-0.36324	0.716426	0.858515	0.858515	104.602	147.518	151.706	110.022	115.732	144.325	116.08	125.905	120.017	121.778	105.723	104.746
ALG14-AS1	0.200954	0.0301218	0.0580207	0.519156	0.603652	NA	1	0	0	0	0	0	0	0	0	0	2.41145	0	0
ALG1L10P	15.7682	0.20635	0.247349	0.834248	0.404141	NA	1	15.1398	18.6619	13.5184	12.3389	15.8537	12.0271	19.8995	31.8075	10.7478	22.9088	11.6393	4.67618
ALG1L11P	2.75382	0.0833975	0.0935718	0.891267	0.372786	NA	1	0	0	15.0204	0	0	0	1.10553	0	2.68696	13.263	0.96994	0
ALG1L12P	0.268583	0	0.0580207	0	1	NA	1	0	0	2.25306	0	0	0	0	0	0	0	0.96994	0
ALG1L13P	0.214329	-0.0205228	0.0580207	-0.353715	0.723552	NA	1	0	0	0.751021	1.02824	0.792686	0	0	0	0	0	0	0
ALG1L14P	0.12517	0	0.0580207	0	1	NA	1	0	0	1.50204	0	0	0	0	0	0	0	0	0
ALG1L15P	0.889439	0.0947902	0.0841491	1.12646	0.259973	NA	1	1.37634	0	2.25306	0	0	0	0	1.32531	0.895652	4.8229	0	0
ALG1L2	16.5098	0.0974904	0.252531	0.386054	0.699457	0.848341	0.848341	15.1398	15.1073	28.5388	10.2824	15.061	20.6179	8.84421	13.2531	18.8087	27.7317	11.6393	13.0933
ALG1L3P	1.86387	0.0704689	0.0784172	0.898641	0.368844	NA	1	0	0	7.51021	0	0	0.859079	0	0	0	12.0572	1.93988	0
ALG1L5P	0.776767	0.0296979	0.0790344	0.375759	0.707096	NA	1	0	0	2.25306	0	1.58537	0	0	0	0.895652	3.61717	0.96994	0
ALG1L6P	2.2505	0.0557537	0.0816472	0.682861	0.494694	NA	1	0	1.77733	9.76327	0	0	0	0	0	0	9.64579	5.81964	0
ALG1L7P	1.74123	0.0352278	0.14028	0.251125	0.801717	NA	1	0	0	3.7551	2.05648	0.792686	3.43631	0	1.32531	0.895652	4.8229	1.93988	1.87047
ALG1L8P	1.72212	0.0515155	0.0768428	0.670401	0.502602	NA	1	0	0	7.51021	0	0	1.71816	0	0	1.7913	9.64579	0	0
ALG2	330.831	0.103925	0.110867	0.937389	0.348558	0.58132	0.58132	301.419	295.036	336.457	296.133	314.696	318.718	365.929	332.654	397.669	347.249	339.479	324.527
ALG3	2139.18	0.0556313	0.122533	0.454012	0.64982	0.816465	0.816465	1834.66	2109.69	2322.16	1885.79	1927.81	2476.72	1853.97	2023.75	2356.46	2366.84	2348.22	2164.13
ALG3P1	1.09098	0.0325772	0.100503	0.324143	0.74583	NA	1	0	0	2.25306	1.02824	1.58537	1.71816	0	5.30125	0	1.20572	0	0
SNX30	4023.54	-0.938054	0.091361	-10.2675	9.86841e-25	1.17208e-22	1.17208e-22	6471.56	5983.37	5716.02	3928.91	3728	3449.2	4973.76	2078.09	4172.84	1684.4	4194.99	1901.33
ALG6	337.979	0.286529	0.135192	2.11941	0.0340555	0.120977	0.120977	293.161	278.152	265.11	295.105	287.745	323.014	449.949	365.786	424.539	397.889	315.23	360.066
CD37	1092.01	0.964505	0.0939939	10.2614	1.05209e-24	1.23942e-22	1.23942e-22	523.01	585.629	542.988	761.926	809.332	802.379	1447.13	1602.3	1364.97	1380.55	1523.78	1760.11
ALG9	132.118	0.141634	0.161433	0.877355	0.380294	0.611661	0.611661	118.365	130.633	129.176	127.502	120.488	126.285	150.352	160.363	117.33	135.041	145.491	124.386
ALG9-IT1	1.60549	0.14336	0.140065	1.02352	0.306061	NA	1	1.37634	0.888663	0.751021	0	0	0.859079	1.10553	1.32531	5.37391	0	2.90982	4.67618
ALK	10.5326	0.212021	0.166239	1.2754	0.202167	NA	1	0	8.88663	28.5388	1.02824	0.792686	12.0271	4.4221	2.65063	4.47826	43.4061	14.5491	5.61141
ALKAL1	1.4527	0.0205136	0.0883043	0.232305	0.816301	NA	1	0	0	1.50204	0	0	1.71816	0	0	0.895652	3.61717	9.6994	0
ALKAL2	2.21169	0.0503799	0.121908	0.413261	0.679415	NA	1	0	0.888663	6.00816	2.05648	0	3.43631	0	0	0.895652	8.44007	3.87976	0.935235
ALKBH1	225.369	0.0830488	0.144226	0.575824	0.564734	0.758528	0.758528	192.688	219.5	202.776	250.891	243.355	202.743	218.894	282.292	238.243	220.648	192.048	240.355
ALKBH2	267.89	-0.146908	0.132418	-1.10943	0.267246	0.498635	0.498635	240.86	247.048	265.861	329.037	274.269	311.846	258.693	280.966	266.009	265.259	201.748	273.089
ALKBH3	236.19	-0.265532	0.161935	-1.63975	0.101058	0.265423	0.265423	275.268	268.376	250.09	258.088	267.135	239.683	242.11	230.604	248.096	217.03	161.98	175.824
ALKBH3-AS1	0.607906	0.0511688	0.0587267	0.871304	0.383588	NA	1	0	0	1.50204	0	0	0	0	0	0	4.8229	0.96994	0
ALKBH4	281.237	-0.239602	0.114539	-2.09188	0.0364495	0.127481	0.127481	315.182	287.927	308.669	324.924	297.257	287.791	273.065	230.604	258.843	264.054	260.914	265.607
ALKBH5	3508.48	-0.0963816	0.0770719	-1.25054	0.211102	0.431739	0.431739	3468.38	3543.99	3134.76	3983.4	3971.36	3693.18	3249.14	3765.21	3371.23	3417.02	2808.95	3695.11
PLOD1	1580.52	-0.693532	0.0678763	-10.2176	1.65397e-24	1.93274e-22	1.93274e-22	1793.37	1917.73	1869.29	1918.7	2052.26	2013.68	1203.92	1233.87	1353.33	1188.84	1175.57	1245.73
ALKBH7	369.587	-0.0666062	0.132676	-0.502023	0.615651	0.794952	0.794952	408.773	439.888	337.959	386.618	415.367	323.873	374.773	379.04	351.096	336.397	324.93	356.325
ALKBH8	479.613	0.159538	0.11231	1.42051	0.155459	0.354295	0.354295	495.483	454.995	419.069	493.555	496.221	436.412	483.115	575.186	472.904	491.935	400.585	535.89
ALLC	3.17654	0.116212	0.144093	0.806505	0.419952	NA	1	2.75268	1.77733	6.75918	2.05648	2.37806	0	0	0	3.58261	12.0572	5.81964	0.935235
ALMS1	1403.1	0.0428856	0.104297	0.411186	0.680936	0.836148	0.836148	1467.18	1326.77	1432.95	1470.38	1290.49	1201.85	1568.74	1426.04	1336.31	1212.96	1658.6	1444.94
ALMS1-IT1	17.7737	0.310388	0.252785	1.22787	0.219494	0.443148	0.443148	15.1398	15.1073	20.2776	13.3671	15.061	10.3089	19.8995	19.8797	20.6	16.8801	26.1884	20.5752
ALOX12	3.45982	0.0770086	0.111063	0.693376	0.488073	NA	1	0	0	15.7714	1.02824	0	2.57724	1.10553	0	2.68696	14.4687	3.87976	0
ALOX12-AS1	118.546	-0.135406	0.160773	-0.842216	0.399667	0.630175	0.630175	112.86	104.862	117.91	134.699	116.525	132.298	103.919	121.929	125.391	110.927	129.002	112.228
ALOX12B	17.917	-0.0234478	0.189734	-0.123583	0.901646	0.955382	0.955382	19.2688	19.5506	50.3184	23.6495	13.4757	18.8997	0	0	5.37391	43.4061	13.5792	7.48188
ALOX12P1	4.47749	0.196148	0.159916	1.22657	0.219984	NA	1	0	5.33198	5.25714	4.11296	1.58537	0	4.4221	0	5.37391	18.0859	5.81964	3.74094
ALOX15	6.44303	0.309235	0.168938	1.83047	0.0671804	NA	1	2.75268	0.888663	8.26123	1.02824	3.96343	4.29539	3.31658	0	1.7913	38.5832	7.75952	4.67618
ALOX15B	9.37781	0.294546	0.171098	1.7215	0.08516	NA	1	2.75268	7.1093	27.0367	1.02824	0.792686	4.29539	2.21105	0	3.58261	39.7889	15.519	8.41712
ALOX15P2	2.63484	0.0825095	0.0811697	1.01651	0.309389	NA	1	0	0	9.76327	0	0	0.859079	0	0	0	18.0859	2.90982	0
ALOX5	6.47454	0.266068	0.166518	1.59784	0.110078	NA	1	1.37634	5.33198	18.0245	1.02824	1.58537	4.29539	3.31658	1.32531	0.895652	33.7603	5.81964	0.935235
ENSG00000272405	755.657	1.03016	0.101036	10.196	2.06642e-24	2.3954e-22	2.3954e-22	523.01	559.858	541.486	315.67	276.647	320.436	1554.37	553.981	1571.87	688.469	1484.98	677.11
ALOXE3	10.1042	0.156375	0.190921	0.819057	0.412754	NA	1	5.50537	3.55465	22.5306	7.19768	3.96343	10.3089	4.4221	3.97594	7.16522	36.1717	15.519	0.935235
ALOXE3P1	2.23712	0.16666	0.121445	1.3723	0.169969	NA	1	1.37634	1.77733	7.51021	0	0	0.859079	0	1.32531	0	12.0572	1.93988	0
ALPG	4.18173	0.0374993	0.0989221	0.379079	0.704629	NA	1	0	1.77733	14.2694	0	0.792686	7.73171	0	0	0	16.8801	8.72946	0
ALPI	4.75514	0.13961	0.108081	1.29171	0.196456	NA	1	0	0.888663	17.2735	0	0	2.57724	0	0	0	27.7317	4.8497	3.74094
DST	1157.64	1.08214	0.106277	10.1822	2.38038e-24	2.73744e-22	2.73744e-22	929.031	733.147	793.078	670.413	596.893	557.542	1899.29	1380.98	1664.12	1314.24	2043.66	1309.33
ALPK2	12.7363	0.331363	0.251754	1.31622	0.188101	NA	1	11.0107	17.7733	21.7796	9.25416	6.34149	14.6043	4.4221	11.9278	8.06087	19.2916	8.72946	19.6399
ALPK3	15.6708	0.27247	0.208775	1.30508	0.191864	NA	1	12.3871	9.77529	30.0408	9.25416	7.92686	12.8862	3.31658	2.65063	7.16522	59.0805	23.2786	10.2876
ALPL	11.5987	0.210498	0.189236	1.11236	0.265985	NA	1	8.25805	7.99797	21.7796	0	3.96343	15.4634	4.4221	5.30125	7.16522	39.7889	20.3687	4.67618
ALPP	5.35047	0.0273537	0.130056	0.210323	0.833416	NA	1	0	1.77733	14.2694	2.05648	0.792686	9.44986	0	0	1.7913	15.6744	17.4589	0.935235
ALS2	439.527	-0.0383905	0.12907	-0.297439	0.766132	0.887688	0.887688	528.515	522.534	500.931	424.663	401.099	396.035	389.145	312.774	480.069	444.912	448.112	425.532
ALS2CL	113.094	0.421115	0.204426	2.05999	0.0393997	0.135498	0.135498	78.4515	101.308	126.922	93.5699	102.256	99.6531	141.507	117.953	85.0869	166.39	102.814	141.221
ALX1	0.512474	0.0154353	0.0583994	0.264307	0.791544	NA	1	0	0	3.00408	0	0	0	0	0	0	1.20572	1.93988	0
ALX3	2.92446	0.0643553	0.0896262	0.718041	0.472732	NA	1	0	1.77733	4.50612	0	0	3.43631	0	0	0	15.6744	9.6994	0
ALX4	6.01899	0.147928	0.134413	1.10055	0.271094	NA	1	0	2.66599	18.7755	0	0	6.87263	1.10553	2.65063	1.7913	27.7317	9.6994	0.935235
ALYREF	3582.97	-0.111019	0.0678949	-1.63516	0.102015	0.266775	0.266775	3626.66	3816.81	3402.87	3998.83	4236.11	4017.91	2851.15	3921.6	3093.58	3691.93	2617.87	3720.37
AMACR	10.0688	-0.0459023	0.244145	-0.188012	0.850867	NA	1	6.88171	7.1093	14.2694	7.19768	6.34149	12.8862	12.1608	6.62657	21.4956	9.64579	8.72946	7.48188
AMBN	1.26546	0.0318914	0.0862527	0.369743	0.711574	NA	1	0	0	6.00816	0	0	0.859079	0	0	1.7913	3.61717	2.90982	0
AMBP	2.39249	0.0999238	0.138573	0.72109	0.470854	NA	1	0	3.55465	5.25714	1.02824	1.58537	1.71816	1.10553	0	0	9.64579	3.87976	0.935235
AMBRA1	984.567	0.125372	0.0950708	1.31873	0.18726	0.401391	0.401391	1015.74	995.303	885.453	937.755	989.272	843.615	1129.85	1072.18	1038.96	970.608	944.722	991.349
AMD1	2326.17	-0.0317597	0.080786	-0.393134	0.694221	0.844721	0.844721	2324.64	2194.11	2041.27	2623.04	2586.53	2426.04	2250.85	2557.85	2177.33	2446.41	1824.46	2461.54
AMD1P1	0.628359	0.0405392	0.0654627	0.619272	0.535737	NA	1	0	0	2.25306	0	0	0	2.21105	0	0	1.20572	0	1.87047
AMD1P3	1.18378	0.0826168	0.13264	0.622863	0.533375	NA	1	0	0.888663	1.50204	0	0.792686	0.859079	1.10553	0	0.895652	2.41145	3.87976	1.87047
AMD1P4	0.657787	0.02375	0.0652272	0.364112	0.715775	NA	1	0	0	0.751021	0	1.58537	0	0	0	0	3.61717	1.93988	0
AMDHD1	22.1262	0.315928	0.253708	1.24524	0.213043	0.434054	0.434054	11.0107	18.6619	24.0327	17.4801	11.8903	19.7588	25.4271	25.181	27.7652	32.5546	34.9178	16.8342
AMDHD2	300.057	-0.218882	0.164362	-1.33171	0.182956	0.394864	0.394864	370.236	319.919	277.878	303.331	386.831	298.959	285.226	339.28	286.609	225.47	236.665	270.283
AMELX	0.770969	0.0520237	0.0593976	0.875855	0.381109	NA	1	0	0	2.25306	0	0	0	0	0	0	6.02862	0.96994	0
AMER1	795.454	0.237356	0.107853	2.20074	0.0277548	0.103946	0.103946	728.085	685.159	674.416	806.14	801.406	731.076	830.25	1057.6	806.087	793.367	702.237	929.624
AMER2	7.47366	0.100952	0.173466	0.581969	0.560587	NA	1	0	5.33198	19.5265	5.1412	5.5488	8.59079	0	2.65063	5.37391	24.1145	8.72946	4.67618
AMER3	7.87226	0.119922	0.123161	0.973695	0.330208	NA	1	0	2.66599	18.7755	0	1.58537	8.59079	0	0	1.7913	39.7889	19.3988	1.87047
AMFR	1175.73	0.150588	0.112276	1.34124	0.179844	0.391105	0.391105	1055.65	1180.14	960.555	1183.5	1196.16	992.236	1378.59	1297.48	1283.47	1122.53	1116.4	1342.06
SLAMF1	458.204	0.989422	0.0973072	10.168	2.75413e-24	3.14231e-22	3.14231e-22	293.161	311.032	286.89	272.484	298.05	299.818	604.723	604.343	675.322	608.891	676.048	567.688
AMHR2	5.91519	0.155447	0.13003	1.19547	0.231905	NA	1	0	4.44332	21.0286	2.05648	0	4.29539	0	1.32531	0	30.1431	5.81964	1.87047
AMIGO1	3.86944	0.102247	0.113451	0.901245	0.367458	NA	1	1.37634	0	6.75918	0	0.792686	6.01355	0	0	0	18.0859	8.72946	4.67618
AMIGO2	28.6871	0.168684	0.252137	0.669018	0.503484	0.713286	0.713286	9.63439	22.2166	12.7673	45.2426	41.2197	24.9133	13.2663	51.6872	25.9739	39.7889	13.5792	43.9561
SRPK3	826.963	-1.15492	0.113606	-10.166	2.81319e-24	3.18462e-22	3.18462e-22	1138.23	1196.14	1117.52	1175.28	1238.97	1230.2	341.608	475.787	495.296	517.256	426.774	570.493
AMMECR1-IT1	1.52667	0.14158	0.127546	1.11003	0.266986	NA	1	0	0	3.00408	1.02824	0	1.71816	0	3.97594	0.895652	4.8229	1.93988	0.935235
AMMECR1L	849.594	-0.115739	0.0814665	-1.42069	0.155406	0.354229	0.354229	981.332	878.888	935.772	904.851	890.979	837.602	821.406	840.249	798.026	813.864	718.725	773.44
AMN	42.8	0.466612	0.247703	1.88375	0.0595983	0.182807	0.182807	27.5268	36.4352	51.0694	25.706	34.8782	31.7859	61.9095	41.0847	31.3478	73.5492	55.2866	43.0208
MAP7D2	121.763	-1.95593	0.192467	-10.1624	2.91752e-24	3.27713e-22	3.27713e-22	209.204	192.84	181.747	216.959	247.318	190.715	28.7437	33.1328	29.5565	56.669	36.8577	37.4094
GLIS2	201.497	-1.91889	0.190523	-10.0717	7.36816e-24	8.21267e-22	8.21267e-22	330.322	298.591	340.963	374.279	342.44	361.672	32.0603	70.2416	51.9478	95.2522	65.9559	54.2436
ARPP21	6252.93	0.495474	0.0492307	10.0643	7.94264e-24	8.71885e-22	8.71885e-22	4956.21	4860.99	4874.12	4544.82	4622.94	5016.16	8542.4	6663.67	8747.83	6406.01	8810.93	6989.01
AMOTL2	11.106	-0.075677	0.179332	-0.421993	0.67303	NA	1	4.12902	15.9959	21.7796	15.4236	11.0976	17.1816	0	0	3.58261	27.7317	12.6092	3.74094
AMPD1	1.08562	0.096444	0.0918928	1.04953	0.293936	NA	1	0	2.66599	3.00408	0	0	0	0	3.97594	0	2.41145	0.96994	0
DDAH2	1026.1	-1.21922	0.121143	-10.0643	7.94249e-24	8.71885e-22	8.71885e-22	1408	1334.77	1258.71	1499.17	1568.73	1431.22	732.964	711.693	708.461	532.93	538.317	588.263
AMPD3	371.151	0.133544	0.123693	1.07963	0.280306	0.51348	0.51348	425.29	419.449	407.804	283.794	285.367	255.146	505.225	327.352	432.6	260.436	530.557	320.786
AMPH	1.35479	0.0355247	0.0992015	0.358107	0.720263	NA	1	0	2.66599	2.25306	0	0.792686	2.57724	0	0	0	6.02862	1.93988	0
AMT	3.01533	0.142537	0.144996	0.98304	0.325588	NA	1	5.50537	1.77733	3.00408	0	0.792686	1.71816	1.10553	0	5.37391	12.0572	4.8497	0
AMTN	0.163062	0.0174606	0.0580207	0.300938	0.763461	NA	1	0	0	0.751021	0	0	0	0	0	0	1.20572	0	0
AMY1A	0.140112	-0.00786165	0.0580207	-0.135497	0.892219	NA	1	0	0.888663	0	0	0.792686	0	0	0	0	0	0	0
AMY2A	0.239865	0	0.0580207	0	1	NA	1	1.37634	0	1.50204	0	0	0	0	0	0	0	0	0
AMY2B	64.7549	0.0765138	0.224262	0.34118	0.732968	0.868885	0.868885	60.559	47.0991	56.3265	66.8356	58.6588	48.9675	118.291	67.591	67.1739	57.8748	65.9559	61.7255
AMZ1	10.5416	0.109986	0.18601	0.591294	0.554323	NA	1	2.75268	4.44332	25.5347	5.1412	9.51223	13.7453	0	5.30125	4.47826	32.5546	16.489	6.54665
AMZ2	463.901	0.288213	0.131147	2.19764	0.0279749	0.104554	0.104554	381.247	392.789	479.902	349.602	349.575	437.271	543.919	426.751	648.452	479.878	576.144	501.286
AMZ2P2	0.262393	0	0.0580207	0	1	NA	1	0	0	2.25306	0	0	0	0	0	0.895652	0	0	0
SLC35A3	368.298	1.16045	0.11561	10.0376	1.04133e-23	1.1345e-21	1.1345e-21	236.731	239.939	223.053	266.314	207.684	204.461	496.381	544.704	487.235	536.547	474.301	502.221
ANAPC10	56.3371	0.323644	0.21571	1.50037	0.133519	0.320207	0.320207	46.7956	44.4332	60.8327	39.0731	47.5612	61.8537	60.8039	58.3138	60.9043	74.7549	54.3166	66.4017
ANAPC10P1	0.826773	-0.0443136	0.10106	-0.438489	0.661032	NA	1	1.37634	0.888663	0	2.05648	0	0.859079	0	0	0.895652	0	2.90982	0.935235
ANAPC11	1015.23	-0.103117	0.0966409	-1.06701	0.285968	0.518564	0.518564	949.676	1070.84	1107	982.998	1022.56	1201.85	905.426	918.442	970.887	1044.16	994.188	1014.73
ANAPC13	462.502	-0.0527235	0.09841	-0.535753	0.592129	0.778948	0.778948	451.44	477.212	407.804	485.329	508.112	464.761	472.06	498.318	444.243	454.558	432.593	453.589
ANAPC15	938.432	-0.0899869	0.0960216	-0.937152	0.34868	0.58132	0.58132	862.966	852.228	948.539	981.969	1009.88	1166.63	778.29	1031.09	915.356	993.517	780.802	939.911
ANAPC15P1	0.175115	0.0174606	0.0580207	0.300938	0.763461	NA	1	0	0	0	0	0	0	0	0	0.895652	1.20572	0	0
FZD8	729.574	1.11694	0.111492	10.0181	1.26891e-23	1.37212e-21	1.37212e-21	719.827	749.143	649.633	154.236	145.062	149.48	1887.13	331.328	1617.55	341.22	1659.57	350.713
ANAPC1P1	4.71067	0.0582943	0.220089	0.264867	0.791112	NA	1	5.50537	2.66599	3.7551	3.08472	5.5488	2.57724	8.84421	3.97594	3.58261	3.61717	7.75952	5.61141
ANAPC1P5	0.251918	0	0.0580207	0	1	NA	1	1.37634	0	0.751021	0	0	0	0	0	0.895652	0	0	0
ANAPC1P6	0.901774	0.0528437	0.0848495	0.622793	0.533421	NA	1	0	0	0	1.02824	1.58537	0	0	2.65063	0	3.61717	1.93988	0
ANAPC2	848.415	-0.0768008	0.113504	-0.676633	0.498639	0.71038	0.71038	915.267	834.455	716.474	898.682	906.04	912.341	882.21	922.418	849.078	765.635	697.387	880.992
MRPL35	688.293	0.877766	0.087627	10.0171	1.28244e-23	1.37649e-21	1.37649e-21	495.483	478.989	444.604	504.866	505.734	495.688	917.587	958.201	830.269	916.35	765.283	946.458
ANAPC5	3012.27	0.0304357	0.0898568	0.338713	0.734826	0.869336	0.869336	3081.63	2906.82	2611.3	3345.89	3242.09	2884.79	2966.13	3498.83	2908.18	2992.61	2517.96	3191.02
MEGF6	389.063	-1.70581	0.170355	-10.0133	1.33289e-23	1.42012e-21	1.42012e-21	516.128	449.664	481.404	766.039	790.308	767.157	67.4371	181.568	85.0869	194.122	142.581	227.262
ANG	4.72232	-0.0386702	0.223628	-0.172922	0.862713	NA	1	4.12902	6.22064	3.00408	3.08472	5.5488	4.29539	5.52763	5.30125	5.37391	3.61717	7.75952	2.80571
ANGEL1	451.219	0.236696	0.166793	1.4191	0.15587	0.355064	0.355064	459.698	358.131	372.506	399.985	502.563	396.035	549.446	587.114	472.009	443.707	337.539	535.89
ANGEL2	549.17	0.219884	0.120135	1.8303	0.067205	0.199231	0.199231	584.945	511.87	448.359	532.628	481.16	424.385	696.481	597.716	615.313	548.605	604.273	544.307
DSG2	1708.11	0.946629	0.0948606	9.97916	1.88043e-23	1.98887e-21	1.98887e-21	1229.07	1203.25	1091.23	1137.23	1181.1	1044.64	2579.19	2438.58	2282.12	2028.03	2103.8	2179.1
ANGPT2	3.25455	0.132073	0.114364	1.15485	0.248151	NA	1	1.37634	0.888663	12.0163	0	0	1.71816	0	1.32531	0	16.8801	4.8497	0
ANGPT4	103.699	0.0930944	0.202274	0.460239	0.645345	0.814338	0.814338	60.559	50.6538	53.3225	157.321	160.123	151.198	35.3768	178.917	36.7217	217.03	28.1283	115.034
ANGPTL1	0.413065	0.0315673	0.0596898	0.528856	0.596905	NA	1	0	0	0.751021	0	0	0.859079	0	0	0	2.41145	0	0.935235
EPHA7	91.602	-2.26552	0.227201	-9.97143	2.03282e-23	2.13447e-21	2.13447e-21	155.527	127.967	129.176	172.744	199.757	190.715	17.6884	13.2531	17.913	36.1717	25.2184	13.0933
ANGPTL3	0.424962	0.0043734	0.0580717	0.0753103	0.939968	NA	1	0	0	0	0	0	1.71816	0	0	0	2.41145	0.96994	0
ANGPTL4	5.23635	0.115371	0.124276	0.928345	0.353229	NA	1	0	0.888663	18.0245	0	0.792686	4.29539	0	0	2.68696	21.703	11.6393	2.80571
ANGPTL5	0.507196	0.0187201	0.0582874	0.321169	0.748082	NA	1	0	0	0.751021	0	0	1.71816	0	0	0	3.61717	0	0
ANGPTL6	228.038	0.191134	0.150092	1.27345	0.202858	0.421179	0.421179	165.161	164.403	174.988	198.45	221.159	222.501	310.653	216.026	263.322	219.442	275.463	304.887
ANGPTL7	1.45915	0.0634082	0.0981309	0.64616	0.518176	NA	1	0	0.888663	3.00408	0	2.37806	0.859079	0	0	0	8.44007	1.93988	0
ANGPTL8	2.01477	0.0839536	0.0814172	1.03115	0.302469	NA	1	0	1.77733	5.25714	0	0	0	0	0	0	13.263	3.87976	0
ANHX	4.72214	0.0875225	0.102315	0.855422	0.392317	NA	1	0	0.888663	17.2735	0	0	4.29539	0	0	0	21.703	9.6994	2.80571
ANK1	108.716	-0.359551	0.197573	-1.81984	NA	NA	1	125.247	139.52	211.788	199.479	184.696	199.306	5.52763	9.27719	9.85217	130.218	75.6553	14.0285
ANK2	535.331	-0.13879	0.088972	-1.55993	0.118776	0.295461	0.295461	572.558	559.858	606.825	629.283	549.331	608.228	430.05	561.933	426.33	516.05	424.834	538.695
ANK2-AS1	1.14051	0.0938042	0.0860859	1.08966	0.275864	NA	1	0	2.66599	0.751021	0	0	0.859079	0	0	0	8.44007	0.96994	0
ANK3	6.48093	0.294382	0.18438	1.59661	0.110353	NA	1	2.75268	0.888663	7.51021	1.02824	0.792686	2.57724	4.4221	2.65063	8.06087	22.9088	22.3086	1.87047
ANK3-DT	0.14318	-0.0205228	0.0580207	-0.353715	0.723552	NA	1	0	0	0	0	0	1.71816	0	0	0	0	0	0
ANKAR	50.7439	-0.0942598	0.22589	-0.417282	0.676472	0.832863	0.832863	49.5483	64.8724	43.5592	53.4685	49.9392	46.3902	57.4873	58.3138	48.3652	47.0232	57.2265	32.7332
JAML	206.407	2.24815	0.226262	9.93605	2.90098e-23	3.02412e-21	3.02412e-21	24.7741	23.1052	28.5388	31.8754	22.9879	24.9133	591.456	267.713	345.722	160.361	643.07	312.369
ANKDD1B	5.01337	0.189507	0.20191	0.93857	0.347951	NA	1	4.12902	4.44332	12.7673	2.05648	1.58537	3.43631	3.31658	1.32531	4.47826	12.0572	7.75952	2.80571
ANKEF1	67.1428	-0.0209819	0.207473	-0.101131	0.919447	0.963215	0.963215	46.7956	56.8744	71.347	61.6944	62.6222	73.0217	93.9697	70.2416	77.9217	66.3148	66.9259	57.9846
ANKFN1	7.28141	0.237147	0.156575	1.51459	0.129876	NA	1	0	3.55465	19.5265	1.02824	0.792686	5.15447	3.31658	1.32531	1.7913	37.3775	11.6393	1.87047
ANKFY1	1623.92	0.0429041	0.09735	0.44072	0.659416	0.822501	0.822501	1743.82	1505.4	1401.4	1727.44	1702.69	1455.28	1712.46	1763.99	1581.72	1520.42	1619.8	1752.63
NRGN	323.48	-1.90905	0.192451	-9.91967	3.41899e-23	3.53865e-21	3.53865e-21	426.666	533.198	482.906	625.17	535.063	652.041	59.6984	95.4225	84.1913	107.309	117.363	162.731
ANKHD1	54.8155	0.0578596	0.211192	0.273966	0.78411	0.897453	0.897453	61.9354	45.3218	54.0735	55.525	56.2807	43.813	60.8039	63.615	53.7391	48.229	62.0762	52.3732
C14orf132	503.297	-1.19451	0.120446	-9.91739	3.49799e-23	3.59474e-21	3.59474e-21	766.622	764.25	717.225	629.283	619.088	575.583	462.11	255.785	341.243	273.699	408.345	226.327
ANKHD1-EIF4EBP3	21.4463	-0.1743	0.252791	-0.689501	0.490508	0.703639	0.703639	24.7741	22.2166	19.5265	35.9884	16.6464	15.4634	24.3216	14.5784	14.3304	8.44007	33.9479	27.1218
ANKH-DT	1.89478	0.072475	0.117064	0.619108	0.535845	NA	1	0	0	4.50612	0	0	1.71816	2.21105	1.32531	0	2.41145	7.75952	2.80571
ANKIB1	881.862	0.0610735	0.110521	0.552596	0.58054	0.769979	0.769979	860.214	852.228	733.747	905.88	895.735	805.816	1024.82	1028.44	890.278	784.926	886.525	913.725
ANKK1	3.34793	0.0776873	0.0917594	0.846642	0.397195	NA	1	0	3.55465	6.00816	0	0	4.29539	0	0	0	20.4973	5.81964	0
ANKLE1	1659.28	0.0815645	0.0716836	1.13784	0.255187	0.485796	0.485796	1585.55	1593.37	1547.1	1741.84	1658.3	1685.51	1671.56	1899.17	1618.44	1689.22	1421.93	1799.39
ANKLE2	3545.32	0.165195	0.0900996	1.83347	0.0667324	0.19839	0.19839	3892.29	3903.9	3428.41	2931.51	3014.58	2747.33	4811.25	3565.09	4056.41	2960.05	3970.93	3262.1
ANKMY1	736.506	0.0256656	0.0855313	0.300072	0.764122	0.886267	0.886267	799.655	680.716	754.025	742.389	724.515	678.672	728.542	764.706	759.513	725.846	782.742	696.75
ANKMY2	134.042	-0.35793	0.17696	-2.02266	0.0431079	0.144704	0.144704	137.634	124.413	118.661	186.111	168.842	150.339	96.1808	116.628	128.974	156.744	117.363	106.617
ANKRA2	164.508	-0.0479894	0.144493	-0.332123	0.739796	0.872225	0.872225	151.398	165.291	153.208	147.038	138.72	159.789	221.105	131.206	208.687	160.361	199.808	137.48
ANKRD1	0.54896	0.0148357	0.0585245	0.253495	0.799886	NA	1	0	0	1.50204	0	0	0	0	0	0	1.20572	3.87976	0
ANKRD10	1258.15	-0.131614	0.116789	-1.12693	0.25977	0.490789	0.490789	1401.12	1175.7	1224.91	1371.67	1258.79	1167.49	1452.66	1285.55	1244.06	935.642	1355.01	1225.16
ANKRD10-IT1	89.3215	0.166438	0.214177	0.777107	0.437096	0.660016	0.660016	115.613	61.3178	84.8653	91.5134	68.9637	73.0217	117.186	107.35	90.4609	74.7549	97.9639	88.8473
ANKRD11	5767.83	-0.0603348	0.0869945	-0.693547	0.487966	0.702217	0.702217	5874.23	6123.78	6578.19	5369.47	5327.64	6059.94	5543.11	5388.72	5499.3	5015.81	6790.55	5643.21
ANKRD11P1	5.53216	0.147617	0.13487	1.09452	0.273728	NA	1	0	1.77733	15.7714	0	0.792686	6.87263	2.21105	3.97594	0	25.3202	8.72946	0.935235
ANKRD11P2	0.993651	0.0198824	0.104317	0.190595	0.848843	NA	1	1.37634	1.77733	0	0	2.37806	0	1.10553	0	0	2.41145	1.93988	0.935235
DTNA	342.052	1.29819	0.131063	9.90511	3.95546e-23	4.03624e-21	4.03624e-21	181.677	189.285	157.714	140.869	137.135	140.889	668.843	335.304	616.209	387.037	765.283	384.382
ANKRD13A	1687.62	0.096021	0.0671025	1.43096	0.152442	0.349452	0.349452	1604.81	1554.27	1477.26	1706.88	1728.06	1547.2	1832.96	1753.39	1801.16	1737.45	1671.21	1836.8
CCNA1	112.497	2.33665	0.23636	9.88599	4.78819e-23	4.85181e-21	4.85181e-21	11.0107	15.1073	21.0286	21.593	14.2683	40.3767	141.507	257.111	137.93	196.533	148.401	345.102
PTPN14	730.689	-1.55313	0.157366	-9.86951	5.64414e-23	5.67942e-21	5.67942e-21	1066.66	1017.52	995.102	1363.45	1184.27	1072.99	242.11	304.822	388.713	448.529	352.088	332.009
PRKAR2A	1167.68	-1.03864	0.105429	-9.8516	6.74589e-23	6.74124e-21	6.74124e-21	1792	1799.54	1658.25	1505.34	1464.09	1352.19	675.476	633.5	917.148	657.12	819.599	737.901
ANKRD16	140.545	-0.0608089	0.187428	-0.324438	0.745606	0.87665	0.87665	205.075	179.51	128.425	127.502	130.001	109.103	131.558	117.953	170.174	100.075	158.1	129.062
GPSM2	530.963	1.28773	0.131138	9.81964	9.26776e-23	9.19794e-21	9.19794e-21	295.913	313.698	296.653	294.077	291.708	270.61	919.798	797.839	648.452	652.297	801.17	789.339
ANKRD17-DT	20.2325	-0.105749	0.254491	-0.41553	0.677754	0.83353	0.83353	17.8924	18.6619	13.5184	25.706	19.0245	14.6043	24.3216	10.6025	30.4522	10.8515	29.0982	28.0571
ANKRD18A	25.8446	-0.393268	0.227641	-1.72758	0.0840634	0.233438	0.233438	53.6773	47.0991	69.0939	33.9319	23.7806	34.3631	5.52763	0	6.26956	27.7317	6.78958	1.87047
ANKRD18B	5.57626	-0.0169546	0.162227	-0.104511	0.916763	NA	1	5.50537	7.1093	10.5143	4.11296	6.34149	10.3089	0	0	1.7913	19.2916	1.93988	0
ANKRD18CP	2.34261	-0.108142	0.133786	-0.808322	0.418905	NA	1	5.50537	0.888663	2.25306	1.02824	5.5488	5.15447	0	0	0	4.8229	2.90982	0
ANKRD18EP	0.306475	0.0174606	0.0580207	0.300938	0.763461	NA	1	0	0	1.50204	0	0	0	0	0	0	1.20572	0.96994	0
ANKRD2	3.20226	0.175002	0.110501	1.58372	0.113258	NA	1	0	2.66599	5.25714	0	0.792686	0	0	0	2.68696	24.1145	2.90982	0
ANKRD20A1	3.93536	-0.172193	0.189989	-0.906331	0.364761	NA	1	1.37634	10.664	2.25306	2.05648	7.13417	6.01355	2.21105	1.32531	3.58261	4.8229	4.8497	0.935235
ANKRD20A10P	0.132114	-0.0205228	0.0580207	-0.353715	0.723552	NA	1	0	0	0	0	1.58537	0	0	0	0	0	0	0
ANKRD20A18P	3.08709	0.0233606	0.188678	0.123812	0.901464	NA	1	2.75268	1.77733	8.26123	4.11296	2.37806	1.71816	3.31658	3.97594	0.895652	1.20572	2.90982	3.74094
ANKRD20A21P	0.740845	0.0562513	0.0671007	0.838312	0.401856	NA	1	1.37634	0	0.751021	0	0	0	0	0	0	4.8229	1.93988	0
ANKRD20A2P	0.12517	0	0.0580207	0	1	NA	1	0	0	1.50204	0	0	0	0	0	0	0	0	0
ANKRD20A4P	0.820365	0.0616198	0.081342	0.757539	0.448727	NA	1	0	0.888663	0.751021	2.05648	0	0	0	1.32531	0	4.8229	0	0
ANKRD20A7P	0.252895	0.0047995	0.0580207	0.0827205	0.934074	NA	1	0	0	0	0	0	0.859079	0	0	0	1.20572	0.96994	0
ANKRD20A8P	0.790765	0.0483185	0.0803779	0.601142	0.547746	NA	1	0	0.888663	0	0	0	1.71816	0	1.32531	0	3.61717	1.93988	0
ANKRD20A9P	0.446997	0.031268	0.060664	0.51543	0.606253	NA	1	0	0	2.25306	0	0	0	0	0	0	1.20572	0.96994	0.935235
ANKRD22	1.23366	0.0550022	0.0867102	0.634322	0.52587	NA	1	0	0	4.50612	0	0	0	0	0	0.895652	3.61717	4.8497	0.935235
ANKRD23	23.9833	0.0854023	0.252376	0.338393	0.735067	0.869479	0.869479	19.2688	23.9939	23.2816	25.706	11.0976	26.6314	24.3216	23.8556	33.1391	27.7317	30.0681	18.7047
ANKRD24	38.1532	0.373369	0.252557	1.47836	0.139312	0.329142	0.329142	19.2688	33.7692	52.5714	14.3954	19.8172	33.5041	42.01	21.205	38.513	77.1663	76.6253	28.9923
ANKRD26	533.416	0.155052	0.0958585	1.61751	0.105767	0.272485	0.272485	470.709	470.991	445.355	519.261	527.136	438.13	609.145	552.656	656.513	543.782	605.243	562.076
ANKRD26P2	0.342639	0	0.0580295	0	1	NA	1	0	0.888663	2.25306	0	0	0	0	0	0	0	0.96994	0
ANKRD26P3	1.65251	0.0669779	0.0995316	0.672931	0.500991	NA	1	0	0.888663	2.25306	0	0	2.57724	0	0	1.7913	8.44007	3.87976	0
ANKRD26P4	0.987442	0.0378377	0.11694	0.323564	0.746268	NA	1	1.37634	1.77733	0.751021	1.02824	0	0	0	0	0.895652	1.20572	3.87976	0.935235
ANKRD27	2474.86	-0.195803	0.117477	-1.66673	0.0955683	0.255419	0.255419	2676.98	2560.24	2166.69	3236.9	3112.88	2600.43	2071.76	2849.42	1954.31	2337.9	1565.48	2565.35
ANKRD28	1933.84	0.036369	0.100541	0.361732	0.717552	0.858807	0.858807	1823.65	1775.55	1577.89	2033.86	2022.14	1743.07	2271.86	2086.04	2200.62	1818.23	1805.06	2048.17
ANKRD29	2.44266	0.0123151	0.110224	0.111727	0.91104	NA	1	0	0	7.51021	1.02824	2.37806	3.43631	0	0	0	7.23435	6.78958	0.935235
ANKRD30A	1.84469	0.0986863	0.0927034	1.06454	0.287085	NA	1	0	0.888663	3.7551	0	0	0	0	0	1.7913	10.8515	4.8497	0
ANKRD30B	2.11782	0.0790017	0.106174	0.744075	0.456831	NA	1	0	0.888663	10.5143	0	0	0	1.10553	0	1.7913	7.23435	3.87976	0
ANKRD30BL	2.47735	0.159039	0.112582	1.41266	0.157757	NA	1	0	0.888663	5.25714	1.02824	0	0.859079	0	0	0	16.8801	3.87976	0.935235
ANKRD30BP1	0.242485	0	0.0580207	0	1	NA	1	0	0	0	0	0	0	0	0	0	0	2.90982	0
ANKRD30BP2	0.161657	0	0.0580207	0	1	NA	1	0	0	0	0	0	0	0	0	0	0	1.93988	0
ANKRD31	18.0063	0.301149	0.254157	1.18489	0.236059	0.463545	0.463545	15.1398	7.1093	18.0245	12.3389	15.8537	18.8997	17.6884	22.5303	17.0174	22.9088	24.2485	24.3161
ANKRD33	4.11886	0.0741342	0.120163	0.616948	0.537269	NA	1	0	1.77733	17.2735	0	0	3.43631	0	0	3.58261	10.8515	9.6994	2.80571
SATB1	7359.43	0.862976	0.0883766	9.76475	1.59501e-22	1.57222e-20	1.57222e-20	5305.8	4992.51	4886.89	5407.52	5374.41	5242.1	10143.2	11263.8	9158.04	9297.34	8088.33	9153.15
ANKRD33B-AS1	0.542688	0	0.0664198	0	1	NA	1	1.37634	1.77733	2.25306	0	0	0	1.10553	0	0	0	0	0
ANKRD33BP1	1.43808	0.0727931	0.113886	0.639175	0.522709	NA	1	0	0	3.00408	0	0	1.71816	1.10553	0	1.7913	4.8229	3.87976	0.935235
ANKRD33BP10	1.12003	0.0832573	0.076017	1.09525	0.273409	NA	1	0	1.77733	2.25306	0	0	0	0	0	0	8.44007	0.96994	0
ANKRD33BP2	2.371	0.0597404	0.0994955	0.600433	0.548218	NA	1	0	0.888663	10.5143	0	0	3.43631	0	0	1.7913	10.8515	0.96994	0
ANKRD33BP3	1.81576	0.0148241	0.0873342	0.16974	0.865214	NA	1	0	0	8.26123	1.02824	0	4.29539	0	0	0	7.23435	0.96994	0
ANKRD33BP5	1.54914	0.0215295	0.0878207	0.245153	0.806338	NA	1	0	3.55465	3.7551	0	0	2.57724	0	0	0	4.8229	3.87976	0
ANKRD33BP6	1.7846	0.0261279	0.0800891	0.326236	0.744246	NA	1	0	1.77733	8.26123	0	0	0	0	0	0	3.61717	7.75952	0
ANKRD33BP7	1.2523	0.0589524	0.0635167	0.928141	0.353334	NA	1	0	0	1.50204	0	0	0	0	0	0	9.64579	3.87976	0
ANKRD33BP8	1.27295	0.0811114	0.0873686	0.928381	0.35321	NA	1	0	0	4.50612	0	0	0	0	0	0.895652	6.02862	2.90982	0.935235
ANKRD33BP9	0.519482	0.0470371	0.0622193	0.755988	0.449657	NA	1	0	0	0.751021	0	0	0	0	0	0.895652	3.61717	0.96994	0
ANKRD34A	40.4911	-0.187999	0.252973	-0.743156	0.457387	0.678356	0.678356	53.6773	47.0991	62.3347	60.6662	38.0489	28.3496	27.6381	15.9038	37.6174	55.4633	31.0381	28.0571
ANKRD34B	1.85684	0.0323355	0.077021	0.419827	0.674612	NA	1	0	0	3.7551	0	0	0.859079	0	0	0	6.02862	11.6393	0
ANKRD34C	2.88722	0.0172651	0.11062	0.156076	0.875973	NA	1	1.37634	0.888663	7.51021	0	3.17074	4.29539	0	0	0	9.64579	7.75952	0
ANKRD34C-AS1	5.61087	0.0636335	0.103257	0.616263	0.537721	NA	1	0	6.22064	13.5184	0	0	10.3089	0	0	1.7913	27.7317	7.75952	0
ANKRD35	15.2144	-0.278385	0.204782	-1.35942	0.174013	NA	1	19.2688	23.1052	24.0327	20.5648	18.2318	35.2222	0	1.32531	1.7913	26.5259	9.6994	2.80571
ANKRD36	531.805	-0.18014	0.13134	-1.37156	0.170202	0.377157	0.377157	595.956	482.544	564.016	548.052	528.722	547.233	646.733	516.872	455.887	431.649	592.633	471.359
ANKRD36B	259.915	0.0731033	0.16249	0.449893	0.652788	0.818286	0.818286	309.677	241.716	217.796	233.411	233.05	237.965	357.085	259.761	274.965	206.179	268.673	278.7
ANKRD36BP1	2.37938	0.202738	0.167288	1.21191	0.225546	NA	1	0	0.888663	3.00408	1.02824	0.792686	0	3.31658	1.32531	4.47826	6.02862	5.81964	1.87047
ANKRD36C	427.999	0.176706	0.117692	1.50143	0.133245	0.319762	0.319762	480.343	409.674	377.763	341.376	374.148	338.477	566.029	428.076	504.252	359.306	543.166	413.374
ANKRD37	77.3225	0.0535493	0.205283	0.260856	0.794204	0.90256	0.90256	63.3117	71.093	68.3429	76.0898	74.5125	89.3442	64.1205	66.2657	100.313	97.6637	69.8357	86.9769
ANKRD39	91.6351	-0.276182	0.20098	-1.37418	0.169386	0.376211	0.376211	82.5805	95.0869	103.641	84.3157	90.3662	137.453	79.5979	72.8922	94.9391	89.2236	85.3547	84.1712
ANKRD40	1712.59	0.0438235	0.0699513	0.626486	0.530996	0.735366	0.735366	1611.7	1706.23	1632.72	1746.98	1750.25	1782.59	1511.25	1827.61	1806.53	1792.91	1556.75	1825.58
ANKRD40CL	2.16376	0.0475952	0.097759	0.486863	0.626355	NA	1	0	0.888663	5.25714	0	0.792686	4.29539	0	0	0	10.8515	3.87976	0
CA5B	272.282	-1.3933	0.142814	-9.75603	1.7382e-22	1.70179e-20	1.70179e-20	352.343	343.913	338.71	419.522	455.794	421.808	197.889	170.965	134.348	138.658	150.341	143.091
ANKRD42-DT	95.998	-0.0379698	0.192853	-0.196885	0.843918	0.927164	0.927164	99.0966	103.085	90.1225	101.796	91.9516	97.0759	78.4923	72.8922	106.583	89.2236	104.754	116.904
RGS4	35.1677	-2.42075	0.248767	-9.73098	2.22443e-22	2.16323e-20	2.16323e-20	39.9139	52.4311	45.8123	78.1463	98.2931	92.7805	0	1.32531	0	4.8229	1.93988	6.54665
ANKRD44-AS1	0.522317	0.0677835	0.0580595	1.16748	0.243015	NA	1	0	0	0	0	0	0	0	2.65063	0	3.61717	0	0
ANKRD44-DT	0.229119	0.0047995	0.0580207	0.0827205	0.934074	NA	1	0	0	0.751021	0	0.792686	0	0	0	0	1.20572	0	0
ANKRD44-IT1	2.47451	0.045007	0.174272	0.258257	0.796208	NA	1	2.75268	2.66599	4.50612	2.05648	3.96343	0	3.31658	2.65063	0.895652	1.20572	1.93988	3.74094
ANKRD45	1.22968	0.0428033	0.0845368	0.506328	0.612626	NA	1	0	0	6.00816	1.02824	0	0	1.10553	0	1.7913	4.8229	0	0
ANKRD46	607.489	-0.097042	0.130665	-0.742681	0.457675	0.678505	0.678505	695.053	600.736	584.294	673.497	670.612	573.005	635.677	646.753	616.209	583.571	455.872	554.594
ANKRD49	427.525	0.201791	0.101103	1.9959	0.0459444	0.151361	0.151361	379.87	434.556	386.776	377.364	405.855	399.472	475.376	483.739	470.217	424.415	430.653	462.006
ANKRD49P1	13.2561	0.153461	0.250127	0.613531	0.539526	NA	1	13.7634	14.2186	13.5184	17.4801	10.3049	5.15447	14.3718	18.5544	14.3304	6.02862	13.5792	17.7695
ANKRD49P2	0.525868	-0.0168745	0.0585235	-0.288338	0.773088	NA	1	0	0	3.7551	0	1.58537	0	0	0	0	0	0.96994	0
ANKRD50	644.569	-0.0272671	0.126393	-0.215732	0.829197	0.920765	0.920765	668.902	588.295	542.237	683.78	632.563	626.268	765.024	758.079	686.965	541.37	635.311	606.032
ANKRD52	2748.26	0.0549499	0.0642338	0.855466	0.392293	0.623145	0.623145	2873.8	2706.87	2654.11	2773.16	2550.86	2548.03	2768.24	2791.11	2882.21	2551.31	3045.61	2833.76
ANKRD53	7.08704	0.230833	0.179302	1.2874	0.197956	NA	1	5.50537	6.22064	10.5143	2.05648	0.792686	6.87263	3.31658	0	4.47826	28.9374	12.6092	3.74094
ANKRD54	606.479	-0.0134816	0.110027	-0.12253	0.902479	0.955915	0.955915	623.483	657.611	634.612	564.504	667.442	554.965	540.602	579.162	680.696	559.456	584.874	630.349
ANKRD54P1	0.318935	0.0427829	0.0580207	0.737374	0.460895	NA	1	0	0	0.751021	0	0	0	0	0	0	1.20572	0	1.87047
ANKRD55	5.33122	0.193394	0.168265	1.14934	0.250415	NA	1	8.25805	5.33198	15.7714	0	0.792686	0	3.31658	0	1.7913	13.263	13.5792	1.87047
ANKRD6	53.6799	-0.0518253	0.243133	-0.213156	0.831205	0.921768	0.921768	34.4085	47.9878	49.5674	66.8356	61.0368	56.6992	44.221	43.7353	29.5565	65.1091	79.5351	65.4665
ANKRD60	2.72097	0.0453646	0.0876437	0.517602	0.604736	NA	1	0	0	6.75918	0	0	3.43631	0	0	0	10.8515	10.6693	0.935235
ANKRD61	2.8557	0.0692995	0.177348	0.390755	0.695979	NA	1	2.75268	1.77733	0	2.05648	3.17074	3.43631	4.4221	2.65063	2.68696	8.44007	1.93988	0.935235
ANKRD62	1.6302	0.0162702	0.0901473	0.180485	0.856772	NA	1	0	0	8.26123	0	0	0.859079	2.21105	0	0	2.41145	5.81964	0
ANKRD62P1-PARP4P3	0.483483	0.0307994	0.0612866	0.502548	0.615282	NA	1	0	0	0.751021	0	0	0	0	0	0	1.20572	2.90982	0.935235
ANKRD63	107.543	0.332436	0.180002	1.84685	0.0647695	0.194389	0.194389	92.2149	58.6518	73.6	101.796	137.927	108.244	87.3365	147.11	86.8782	157.95	87.2946	151.508
ANKRD65	5.57256	-0.00118719	0.157993	-0.00751415	0.994005	NA	1	2.75268	8.88663	13.5184	2.05648	0	12.0271	2.21105	0	1.7913	12.0572	9.6994	1.87047
ANKRD65-AS1	0.651928	0.0092522	0.0896109	0.103249	0.917766	NA	1	0	0.888663	3.00408	0	0	0.859079	0	0	0.895652	1.20572	0.96994	0
ANKRD66	1.15323	0.0627589	0.0629522	0.99693	0.318799	NA	1	0	0	2.25306	0	0	0	0	0	0	9.64579	1.93988	0
ANKRD7	21.7921	0.462793	0.252724	1.83122	0.0670679	0.19902	0.19902	17.8924	16.8846	26.2857	15.4236	14.2683	12.0271	37.5879	25.181	27.7652	21.703	18.4289	28.0571
ANKRD9	145.191	0.0334376	0.17532	0.190723	0.848743	0.928593	0.928593	129.376	187.508	153.959	141.897	152.988	163.225	117.186	140.483	128.078	143.481	98.9339	185.177
ANKS1A	541.986	0.148057	0.0836421	1.77012	0.0767065	0.219833	0.219833	455.569	446.109	452.865	559.363	560.429	557.542	575.979	600.367	532.017	640.24	500.489	622.867
ANKS1B	7.10427	0.0769047	0.190017	0.404726	0.685679	NA	1	4.12902	0.888663	9.76327	6.16944	5.5488	8.59079	0	3.97594	6.26956	16.8801	16.489	6.54665
ANKS3	172.311	0.0861152	0.156707	0.549529	0.582643	0.77185	0.77185	152.774	166.18	188.506	149.095	160.915	178.688	191.256	196.146	170.174	185.682	184.289	144.026
ANKS4B	2.38309	0.0812059	0.0795528	1.02078	0.307359	NA	1	0	0	6.00816	0	0	0.859079	0	0	0	16.8801	4.8497	0
ANKS6	401.874	0.196685	0.108462	1.8134	0.0697703	0.204982	0.204982	363.354	375.904	362.743	378.392	445.49	378.854	354.874	457.233	411.104	438.884	363.727	491.934
ANKUB1	1.37113	0.0468364	0.0977351	0.479218	0.631783	NA	1	0	0.888663	3.7551	1.02824	0	2.57724	0	0	0	7.23435	0.96994	0
ANKZF1	965.754	0.137197	0.0905131	1.51577	0.129579	0.314064	0.314064	891.869	953.535	969.568	815.395	838.662	966.463	1090.05	991.334	1055.08	868.121	1118.34	1030.63
ANLN	939.848	0.118733	0.112495	1.05545	0.291218	0.524499	0.524499	907.009	896.661	827.625	949.066	979.76	859.938	1015.98	1106.64	837.435	841.595	964.12	1092.35
ANO1	8.88648	0.115869	0.118257	0.979809	0.327181	NA	1	1.37634	0.888663	27.0367	1.02824	0	7.73171	0	0	6.26956	45.8175	16.489	0
ANO10	238.959	0.020463	0.137517	0.148803	0.881709	0.945527	0.945527	225.72	254.158	272.62	240.608	218.781	204.461	247.638	204.098	243.617	250.791	287.102	217.91
ANO1-AS1	0.563241	0.0402859	0.0585286	0.688312	0.491257	NA	1	0	0.888663	2.25306	0	0	0	0	0	0	3.61717	0	0
ANO2	5.50053	0.181461	0.151971	1.19405	0.23246	NA	1	1.37634	6.22064	20.2776	0	0.792686	6.01355	1.10553	1.32531	0	24.1145	2.90982	1.87047
ANO3	2.55292	0.181719	0.121742	1.49266	0.135526	NA	1	0	1.77733	6.75918	0	0	1.71816	0	0	0.895652	15.6744	1.93988	1.87047
ANO3-AS1	0.205998	0	0.0580207	0	1	NA	1	0	0	1.50204	0	0	0	0	0	0	0	0.96994	0
ANO4	3.36498	0.123084	0.10086	1.22035	0.222333	NA	1	0	4.44332	11.2653	1.02824	0	0	0	0	0	21.703	1.93988	0
RHOB	565.913	-1.80884	0.186165	-9.71632	2.56904e-22	2.48169e-20	2.48169e-20	1036.39	967.754	793.078	914.106	895.735	856.501	214.472	140.483	319.748	272.494	196.898	183.306
SYK	2600.15	0.882384	0.0910951	9.6864	3.44472e-22	3.30557e-20	3.30557e-20	1820.9	1843.98	1692.05	1880.65	1898.48	1703.55	3718.99	3815.58	3157.17	3060.13	3163.94	3446.34
ANO7	12.9337	0.166889	0.14101	1.18353	0.236601	NA	1	0	2.66599	28.5388	0	1.58537	10.3089	7.73868	0	8.06087	61.4919	32.008	2.80571
ANO7L1	10.5978	0.322919	0.231593	1.39433	0.163217	NA	1	9.63439	3.55465	8.26123	2.05648	8.71955	12.0271	18.7939	9.27719	7.16522	27.7317	8.72946	11.2228
IL18BP	390.192	1.20171	0.124107	9.68287	3.56564e-22	3.39909e-20	3.39909e-20	221.591	228.386	217.045	209.761	217.196	252.569	531.758	597.716	511.417	503.993	636.281	554.594
PFN2	153.484	1.69237	0.174863	9.67825	3.73059e-22	3.53309e-20	3.53309e-20	144.516	130.633	125.42	51.412	45.1831	51.5447	231.055	170.965	199.73	198.944	274.493	217.91
ANOS1	1.74184	0.0786614	0.116243	0.676695	0.498599	NA	1	0	0.888663	6.00816	0	0	0.859079	0	0	4.47826	4.8229	2.90982	0.935235
ANP32A	9293.43	0.0662943	0.0618734	1.07145	0.283967	0.51705	0.51705	8245.66	9017.26	8939.4	8988.88	9329.12	10235.9	8432.95	9657.56	9446.44	10088.3	8968.06	10171.6
ANP32AP1	17.204	-0.069962	0.248619	-0.281402	0.778402	0.894878	0.894878	12.3871	25.7712	15.0204	7.19768	12.683	36.0813	18.7939	18.5544	17.0174	14.4687	11.6393	16.8342
ANP32B	10651.5	0.0403552	0.068669	0.587677	0.556749	0.752897	0.752897	9816.07	10641.7	10922.8	10111.7	10789.2	11637.1	9375.97	11049.1	10782.8	10752.6	10262	11676.4
ANP32BP1	26.7236	-0.00453934	0.254308	-0.0178498	0.985759	0.993576	0.993576	20.6451	45.3218	13.5184	34.9602	28.5367	20.6179	33.1658	30.4822	23.287	18.0859	17.4589	34.6037
ANP32BP2	0.489186	0.0415812	0.0581957	0.714506	0.474914	NA	1	0	0	2.25306	0	0	0	0	0	0	3.61717	0	0
ANP32BP3	0.589663	0.0524283	0.0586465	0.893971	0.371337	NA	1	0	0	2.25306	0	0	0	0	0	0	4.8229	0	0
ANP32C	14.6677	0.171832	0.250888	0.684896	0.493409	NA	1	15.1398	18.6619	8.26123	10.2824	17.4391	12.8862	9.94973	21.205	16.1217	7.23435	13.5792	25.2514
ANP32D	3.84449	0.136347	0.164381	0.829459	0.406845	NA	1	1.37634	5.33198	6.75918	3.08472	0	1.71816	6.63316	5.30125	0	7.23435	7.75952	0.935235
ANP32E	6985.49	0.138165	0.0623361	2.21645	0.0266604	0.100759	0.100759	6254.1	6526.34	6338.61	6975.58	7141.31	7248.9	6674.06	8097.66	7158.95	7917.99	5953.49	7538.93
NKD2	202.857	-2.22671	0.230092	-9.67746	3.75923e-22	3.53709e-20	3.53709e-20	368.86	462.993	474.645	229.298	265.55	371.981	63.015	18.5544	33.1391	43.4061	77.5952	25.2514
ANTKMT	166.547	-0.0873241	0.178749	-0.488529	0.625175	0.80173	0.80173	185.806	139.52	173.486	204.62	177.562	135.734	176.884	140.483	183.609	170.007	140.641	170.213
ANTXR1	905.927	-0.0535847	0.0859014	-0.623793	0.532764	0.736406	0.736406	843.697	908.214	937.274	1006.65	930.613	900.314	881.104	1005.91	871.469	897.059	856.457	832.359
ANTXR2	109.64	0.0486673	0.194647	0.250029	0.802565	0.907041	0.907041	88.0859	101.308	96.1306	103.852	107.805	103.089	124.924	129.881	151.365	122.984	108.633	77.6245
ANTXRL	4.24411	0.125442	0.0872722	1.43737	0.150614	NA	1	0	0	9.01225	0	0	0	0	0	0.895652	36.1717	4.8497	0
ANTXRLP1	2.42149	0.067563	0.0990373	0.682198	0.495114	NA	1	0	6.22064	3.7551	0	0	5.15447	0	0	0	12.0572	0	1.87047
ANXA1	6.35434	0.327894	0.206903	1.58477	0.113019	NA	1	0	2.66599	8.26123	3.08472	3.96343	9.44986	3.31658	9.27719	4.47826	20.4973	0.96994	10.2876
ANXA10	0.388709	0.0300375	0.058031	0.51761	0.60473	NA	1	0	0	2.25306	0	0	0	0	0	0	2.41145	0	0
ANXA11	2306.2	-0.0152303	0.0583349	-0.261084	0.794028	0.90246	0.90246	2353.54	2459.82	2194.48	2333.08	2252.02	2285.15	2355.88	2166.89	2378.85	2264.35	2272.57	2357.73
ANXA13	3.51845	0.19401	0.150381	1.29012	0.197008	NA	1	2.75268	5.33198	10.5143	0	0.792686	0.859079	0	0	2.68696	14.4687	3.87976	0.935235
ANXA2	12887	-0.259507	0.178074	-1.4573	0.145034	0.337488	0.337488	14197	14449.7	12897.3	13915.2	14354	13155.1	9223.4	8056.58	16377	13108.6	12498.6	12411.5
ANXA2P1	12.1865	-0.0361987	0.248662	-0.145574	0.884258	NA	1	20.6451	18.6619	14.2694	15.4236	19.0245	6.01355	6.63316	14.5784	5.37391	9.64579	1.93988	14.0285
ANXA2P2	58.4958	-0.0606776	0.202563	-0.299549	0.764521	0.886446	0.886446	70.1934	70.2044	65.3388	60.6662	65.0003	60.1355	39.7989	60.9644	53.7391	50.6404	40.7375	64.5312
ANXA2P3	0.696474	-0.029176	0.0762662	-0.382555	0.70205	NA	1	1.37634	0	0.751021	3.08472	0	0	0	0	0	1.20572	1.93988	0
ANXA2R	1291.38	-0.0235561	0.0901135	-0.261404	0.793781	0.90242	0.90242	1399.74	1279.67	1302.27	1176.31	1177.93	1129.69	1447.13	1097.36	1484.99	1039.33	1679.94	1282.21
SIRPA	768.651	1.10004	0.113776	9.66848	4.10419e-22	3.83675e-20	3.83675e-20	443.182	465.659	457.372	489.442	563.6	550.669	804.823	1163.62	838.33	1077.92	1026.2	1343
MTDH	12162.9	0.392026	0.0406275	9.64927	4.95056e-22	4.59831e-20	4.59831e-20	10878.6	11381.1	11019	10368.8	10442.8	10465.3	13454.3	14312.1	13445.5	12943.4	13381.3	13862.1
ANXA3	2.62437	0.0705717	0.0901402	0.782911	0.43368	NA	1	0	0	6.00816	0	0	4.29539	0	0	0	14.4687	4.8497	1.87047
GLO1	1791.46	-0.758353	0.0790127	-9.59786	8.16199e-22	7.53294e-20	7.53294e-20	2134.71	2262.54	1996.21	2343.36	2524.7	2420.02	1168.54	1301.46	1289.74	1466.16	1108.64	1481.41
CUL2	952.322	0.848823	0.0885066	9.59051	8.76519e-22	8.03845e-20	8.03845e-20	696.429	662.054	612.082	754.728	699.942	664.068	1230.45	1396.88	1150.02	1241.9	1069.84	1249.47
ANXA6	1250.48	-0.0156902	0.0672301	-0.233381	0.815465	0.913639	0.913639	1120.34	1217.47	1099.49	1220.52	1326.96	1326.42	1256.98	1312.06	1330.94	1253.95	1270.62	1270.05
POLR1F	2227.73	-0.598318	0.0624368	-9.58278	9.44702e-22	8.60927e-20	8.60927e-20	2598.53	2591.34	2468.6	2861.59	2918.67	2818.64	1708.04	2017.13	1596.05	1779.65	1522.81	1851.77
ANXA8	2.33897	0.182193	0.132461	1.37545	0.168992	NA	1	0	0.888663	7.51021	1.02824	0	1.71816	0	1.32531	0	10.8515	1.93988	2.80571
ANXA8L1	0.742481	0.0808001	0.092338	0.875048	0.381548	NA	1	0	1.77733	0.751021	0	0	0.859079	0	0	0	3.61717	0.96994	0.935235
ANXA9	3.23152	0.227942	0.161612	1.41043	0.158412	NA	1	1.37634	2.66599	6.00816	3.08472	2.37806	0.859079	0	2.65063	0	16.8801	1.93988	0.935235
AOAH	2.06495	0.150008	0.129459	1.15873	0.246566	NA	1	0	1.77733	4.50612	0	0	1.71816	1.10553	1.32531	1.7913	9.64579	2.90982	0
AOAH-IT1	0.401908	0.0554441	0.0580207	0.955592	0.339278	NA	1	0	0	0	0	0	0	0	0	0	4.8229	0	0
AOC1	3.70784	0.152987	0.11927	1.28269	0.1996	NA	1	0	1.77733	9.01225	0	0	5.15447	0	0	0.895652	22.9088	1.93988	2.80571
AOC2	55.83	-0.344554	0.216587	-1.59083	0.111647	0.282728	0.282728	56.43	70.2044	55.5755	62.7227	76.8905	68.7263	42.01	49.0366	44.7826	37.3775	40.7375	65.4665
AOC3	43.8273	-0.206122	0.220432	-0.935078	0.349748	0.58231	0.58231	42.6666	32.8805	48.8163	52.4403	57.8661	51.5447	34.2713	46.386	32.2435	50.6404	37.8277	38.3446
AOPEP	231.437	-0.245719	0.143882	-1.70779	0.0876761	0.240702	0.240702	333.075	312.809	282.384	215.93	221.952	188.138	265.326	180.243	207.791	184.476	229.876	155.249
AOX1	5.6875	0.0563955	0.187514	0.300754	0.763602	NA	1	1.37634	6.22064	11.2653	6.16944	3.17074	8.59079	2.21105	3.97594	0	15.6744	6.78958	2.80571
AOX3P	1.29028	0.126305	0.100875	1.25209	0.210536	NA	1	0	0.888663	0.751021	0	0	0.859079	0	0	0	7.23435	3.87976	1.87047
AP1AR	623.47	-0.0348119	0.0924743	-0.376449	0.706583	0.852986	0.852986	637.246	636.283	562.514	690.977	632.563	616.818	642.311	618.921	613.522	616.125	560.625	653.729
AP1AR-DT	9.69223	0.298491	0.245864	1.21405	0.224728	NA	1	4.12902	10.664	10.5143	6.16944	10.3049	6.87263	5.52763	15.9038	13.4348	15.6744	7.75952	9.35235
EHBP1L1	2361.98	-0.779217	0.0815726	-9.55243	1.26689e-21	1.14733e-19	1.14733e-19	2816	2990.35	2694.66	3087.81	3140.62	3136.5	1708.04	1817	1901.47	1701.28	1491.77	1858.31
AP1G1	2463.97	0.140327	0.0728576	1.92605	0.0540986	0.170931	0.170931	2432	2306.08	2084.83	2562.37	2391.53	2223.3	2590.25	2743.4	2509.62	2492.23	2544.15	2687.87
AP1G2	2375.74	0.0591252	0.0740493	0.798457	0.424605	0.649436	0.649436	2348.04	2263.42	2135.15	2097.61	2137.87	2230.17	2966.13	2410.74	2826.68	1995.47	2761.42	2336.22
AP1G2-AS1	86.4481	-0.418812	0.192683	-2.17359	0.0297363	0.109194	0.109194	79.8278	84.423	102.139	85.3439	108.598	127.144	70.7537	75.5429	83.2956	74.7549	68.8657	76.6893
AP1M1	1493.56	-0.0399268	0.068765	-0.580627	0.561492	0.756065	0.756065	1419.01	1581.82	1499.04	1500.2	1590.92	1534.31	1465.93	1510.86	1449.16	1392.61	1387.98	1590.84
AP1M2	3.9106	0.0903354	0.0951353	0.949546	0.342343	NA	1	0	2.66599	15.0204	0	0	1.71816	0	0	0	21.703	5.81964	0
AP1M2P1	1.11385	0.0841914	0.0976371	0.86229	0.388528	NA	1	2.75268	0.888663	0.751021	0	0	0	2.21105	0	0	4.8229	1.93988	0
AP1S1	604.12	-0.00282849	0.0956615	-0.0295677	0.976412	0.989203	0.989203	561.547	626.507	586.547	605.634	522.38	615.1	676.582	595.066	698.609	561.867	618.822	580.781
AP1S2	979.354	-0.183204	0.117727	-1.55618	0.119664	0.297016	0.297016	1046.02	984.639	886.204	1105.36	1166.83	938.114	1104.42	996.635	883.113	892.236	830.269	918.401
AP1S2P1	0.452289	0.0327787	0.0607364	0.539688	0.589412	NA	1	1.37634	0.888663	0.751021	0	0	0	0	0	0	2.41145	0	0
AP1S3	111.551	0.0229106	0.183068	0.125147	0.900407	0.954488	0.954488	112.86	93.3096	105.894	82.2592	94.3296	82.4715	142.613	91.4466	156.739	91.635	203.687	81.3655
AP2A1	1512.77	0.209555	0.0974815	2.14969	0.0315801	0.114256	0.114256	1574.53	1569.38	1298.51	1308.95	1552.08	1249.96	1675.98	1590.38	1587.1	1524.04	1554.81	1667.52
AP2A2	1782.66	0.00471155	0.0539009	0.0874113	0.930345	0.966348	0.966348	1778.23	1883.08	1900.08	1675	1767.69	1658.88	1824.12	1725.56	1899.68	1706.1	1882.65	1690.91
AP2B1	3220.05	-0.110509	0.105147	-1.05099	0.293261	0.526823	0.526823	3487.65	3302.27	2785.54	3625.58	3808.86	3008.49	3204.92	3382.2	3085.52	2944.38	2693.52	3311.67
AP2B1P1	3.79987	-0.12612	0.188578	-0.668791	0.503629	NA	1	9.63439	0.888663	9.01225	3.08472	3.17074	5.15447	2.21105	2.65063	0.895652	1.20572	5.81964	1.87047
AP2M1	4385.05	-0.0858947	0.0677176	-1.26843	0.204646	0.423434	0.423434	4647.91	4670.81	4154.65	4521.17	4633.25	4350.37	4505.02	4312.57	4482.74	4039.18	3945.72	4357.26
AP2S1	923.51	0.0937453	0.0773497	1.21197	0.225525	0.450987	0.450987	862.966	831.789	874.188	939.812	890.186	989.658	832.461	983.382	947.6	973.019	903.984	1053.07
AP3B1	2289.5	-0.0792718	0.0566315	-1.39978	0.161579	0.364627	0.364627	2387.95	2376.29	2253.81	2342.33	2271.84	2247.35	2446.53	2254.36	2271.37	2040.09	2387.99	2194.06
AP3B2	14.3143	0.196343	0.156475	1.25479	0.209556	NA	1	0	4.44332	43.5592	1.02824	1.58537	9.44986	13.2663	0	7.16522	56.669	26.1884	8.41712
AP3D1	3810.16	-0.126701	0.0639878	-1.98008	0.0476946	0.155512	0.155512	3940.47	4254.03	4002.19	3836.36	3980.08	3945.75	3395.07	3435.21	3630.97	3568.94	3983.54	3749.36
PAIP2	4038.64	-0.445718	0.0470876	-9.46574	2.91502e-21	2.62352e-19	2.62352e-19	4609.37	4653.04	4491.1	4739.16	4630.87	4827.16	3355.27	3628.71	3496.63	3429.08	3257.06	3346.27
IL4R	344.097	1.13556	0.120078	9.45684	3.17395e-21	2.83892e-19	2.83892e-19	244.989	265.71	220.049	189.196	228.294	201.024	453.266	482.414	483.652	462.998	411.255	486.322
AP3S1	1203.18	0.107597	0.0942925	1.1411	0.253828	0.484644	0.484644	1182.28	1242.35	1245.94	923.36	925.857	986.222	1762.21	1015.19	1704.43	1099.62	1399.62	951.134
AP3S2	178.247	0.0042265	0.138845	0.0304405	0.975716	0.988907	0.988907	177.548	196.395	177.992	168.631	152.988	180.406	181.306	159.038	209.583	170.007	192.048	173.019
HDGF	11376.7	-0.702396	0.074408	-9.43978	3.73551e-21	3.3207e-19	3.3207e-19	12619.7	13983.1	14270.9	13995.4	14177.2	15871.5	7446.82	8625.14	8737.09	8833.14	8646.04	9314.01
AP4B1-AS1	0.568216	-0.0203138	0.0648404	-0.313289	0.754061	NA	1	0	0	1.50204	0	1.58537	0	0	0	1.7913	0	1.93988	0
RNF125	326.333	-1.30634	0.138835	-9.40934	4.99249e-21	4.41105e-19	4.41105e-19	483.096	422.115	398.041	506.922	512.868	447.58	226.633	178.917	205.104	163.978	167.8	202.946
CDC42EP3	4062.28	0.643942	0.0684947	9.40135	5.38689e-21	4.73067e-19	4.73067e-19	2466.4	2564.68	2656.36	3734.57	3868.31	3978.39	3354.17	5875.11	3939.97	5945.43	3939.9	6424.13
NIPSNAP1	765.957	-1.00498	0.107127	-9.38118	6.52402e-21	5.69476e-19	5.69476e-19	990.966	1026.41	915.494	1078.62	1177.14	1052.37	399.095	539.402	535.6	523.284	420.954	532.149
SPART	2221.37	0.805091	0.0860826	9.35254	8.55669e-21	7.42434e-19	7.42434e-19	1363.95	1465.41	1369.86	1864.2	1777.2	1885.68	2145.83	2962.07	2660.98	3495.39	2307.49	3358.43
AP5M1	1086.52	0.0611131	0.0943497	0.647729	0.51716	0.724374	0.724374	1128.6	1042.4	973.323	1139.29	1128.78	1022.3	1175.17	1154.35	1066.72	1155.08	923.383	1128.83
AP5S1	170.944	0.307577	0.181805	1.6918	0.0906846	0.246234	0.246234	183.053	151.073	134.433	135.728	158.537	134.016	182.412	159.038	253.47	212.207	167.8	179.565
AP5Z1	306.363	0.0882717	0.128492	0.686985	0.492092	0.704865	0.704865	317.935	295.036	277.127	256.032	289.33	278.341	388.04	331.328	347.513	302.637	342.389	250.643
APAF1	1131.61	0.269112	0.122985	2.18817	0.0286573	0.106391	0.106391	1001.98	974.863	916.996	1227.72	1094.7	948.423	1277.99	1404.83	1054.18	1093.59	1096.03	1487.96
RIOX2	757.579	0.920963	0.0987945	9.322	1.14164e-20	9.84661e-19	9.84661e-19	518.881	449.664	450.612	553.193	557.258	547.233	966.23	1168.93	987.009	971.814	838.998	1081.13
APBA2	19.6818	0.131825	0.234845	0.561325	0.574576	0.765996	0.765996	24.7741	21.3279	40.5551	10.2824	10.3049	16.3225	12.1608	6.62657	12.5391	39.7889	35.8878	5.61141
APBA3	312.222	-0.234472	0.121387	-1.93161	0.0534082	0.169266	0.169266	359.225	299.479	317.682	352.686	341.648	326.45	295.175	265.063	266.904	294.197	330.75	297.405
APBB1	12.8007	0.311713	0.219215	1.42195	0.15504	NA	1	8.25805	13.3299	27.7878	7.19768	3.17074	6.01355	11.0553	2.65063	9.85217	37.3775	20.3687	6.54665
SARAF	7200.9	-0.419216	0.045179	-9.27901	1.71065e-20	1.4667e-18	1.4667e-18	7363.43	7912.66	7650.65	7607.95	7820.64	7976.54	7408.13	5852.58	7922.04	5820.03	7283.28	5792.85
CD96	1621.85	-1.56585	0.16886	-9.27307	1.80867e-20	1.54163e-18	1.54163e-18	2789.84	2667.77	2497.89	2217.91	2260.74	1965.57	1205.02	709.043	1293.32	681.234	709.996	463.877
APBB3	226.617	0.149606	0.149247	1.00241	0.316146	0.550321	0.550321	196.817	183.065	215.543	176.857	217.196	231.092	257.588	223.978	300.939	215.825	239.575	260.931
APC	1067.6	0.00331805	0.0796608	0.0416522	0.966776	0.985162	0.985162	1171.27	1079.73	1074.71	1030.3	1061.41	960.45	1185.12	1052.3	1068.51	938.053	1122.22	1067.1
APC2	37.3429	0.245314	0.211989	1.1572	0.24719	0.476872	0.476872	11.0107	18.6619	72.849	6.16944	15.8537	38.6585	18.7939	13.2531	26.8696	112.132	97.9639	15.899
APCDD1	15.1101	-0.150654	0.173489	-0.868378	0.385187	NA	1	20.6451	34.6579	38.302	12.3389	18.2318	20.6179	0	0	2.68696	19.2916	14.5491	0
APCDD1L	5.24453	0.078896	0.102262	0.77151	0.440405	NA	1	0	0.888663	26.2857	0	0	1.71816	0	0	0	20.4973	12.6092	0.935235
APCDD1L-DT	4.51731	0.177304	0.160504	1.10467	0.269302	NA	1	1.37634	3.55465	8.26123	0	1.58537	3.43631	2.21105	2.65063	3.58261	16.8801	10.6693	0
APCS	0.475963	0.0551183	0.05806	0.949334	0.342451	NA	1	0	0.888663	0	0	0	0	0	0	0	4.8229	0	0
APEH	2190.19	-0.139119	0.0692276	-2.00959	0.0444749	0.147977	0.147977	2232.43	2310.52	2034.51	2411.22	2462.08	2293.74	2014.27	2121.83	2141.5	2111.22	1889.44	2259.53
APELA	4.88156	-0.392125	0.198417	-1.97627	0.0481245	NA	1	8.25805	7.99797	6.75918	8.22592	11.0976	6.87263	0	0	0	3.61717	3.87976	1.87047
APEX1	6889.93	0.00914902	0.0752112	0.121644	0.903181	0.955978	0.955978	6804.63	7125.3	6617.24	6970.44	7514.66	7260.93	6253.96	7331.63	6871.44	7373	5369.59	7186.35
APEX2	927.122	0.150277	0.0921312	1.63112	0.102864	0.268173	0.268173	813.418	981.973	829.878	875.032	958.357	899.455	876.682	1050.97	978.052	957.345	867.126	1037.18
APH1A	1852.35	0.10228	0.114874	0.890365	0.37327	0.60473	0.60473	1841.55	1882.19	1471.25	1873.45	1919.09	1612.49	2169.04	2072.79	1965.96	1788.09	1667.33	1964.93
APH1B	203.192	0.0834269	0.146405	0.569838	0.568788	0.761502	0.761502	247.741	226.609	223.053	175.829	168.842	164.084	221.105	143.134	221.226	195.327	251.214	200.14
AKT3	1268.25	0.80106	0.0865126	9.25947	2.05447e-20	1.74089e-18	1.74089e-18	951.052	921.544	898.221	991.224	894.15	868.528	1729.04	1749.41	1479.62	1486.66	1608.16	1641.34
API5P1	9.44075	-0.324148	0.24775	-1.30837	0.190748	NA	1	13.7634	8.88663	12.0163	16.4518	14.2683	9.44986	5.52763	5.30125	3.58261	6.02862	6.78958	11.2228
API5P2	1.97274	0.0649461	0.164228	0.395463	0.692501	NA	1	2.75268	1.77733	0.751021	1.02824	3.17074	2.57724	1.10553	2.65063	0.895652	6.02862	0	0.935235
APIP	717.159	-0.096036	0.116915	-0.821417	0.411409	0.639969	0.639969	708.816	703.821	597.812	803.056	799.028	693.276	770.552	799.164	763.991	682.44	623.671	660.276
APLF	109.482	0.226495	0.17892	1.2659	0.205548	0.424756	0.424756	99.0966	118.192	81.1102	87.4004	109.391	94.4986	118.291	123.254	128.078	104.898	127.062	122.516
APLN	3.09734	0.0897449	0.119583	0.750481	0.452965	NA	1	0	2.66599	7.51021	0	0	2.57724	0	1.32531	4.47826	10.8515	7.75952	0
APLNR	3.21852	0.254276	0.134269	1.89378	0.0582547	NA	1	0	1.77733	8.26123	0	1.58537	0.859079	0	1.32531	0	22.9088	0.96994	0.935235
APLP1	7.078	0.101842	0.113352	0.898456	0.368943	NA	1	0	1.77733	25.5347	0	0	5.15447	0	0	1.7913	31.3488	17.4589	1.87047
APLP2	3149.26	-0.0174654	0.0708132	-0.24664	0.805187	0.907959	0.907959	2820.12	3001.02	3113.73	3155.67	3282.51	3556.59	2814.67	3280.15	2951.17	3130.06	3225.05	3460.37
APMAP	1503.26	-0.0250206	0.0714528	-0.35017	0.726211	0.864319	0.864319	1430.02	1569.38	1496.03	1391.21	1483.91	1507.68	1659.39	1427.36	1636.36	1331.12	1562.57	1544.07
APOA1	8.48466	-0.0634424	0.24493	-0.259023	0.795618	NA	1	8.25805	5.33198	8.26123	7.19768	6.34149	16.3225	6.63316	7.95188	8.06087	8.44007	8.72946	10.2876
APOA1-AS	1.32369	0.170612	0.10524	1.62117	0.10498	NA	1	0	1.77733	0.751021	0	0	0	1.10553	0	0	8.44007	1.93988	1.87047
APOA2	0.963744	0.0745762	0.0722208	1.03261	0.301785	NA	1	0	0.888663	1.50204	0	0	0	0	0	0	7.23435	1.93988	0
APOA4	2.01933	0.0850859	0.0892515	0.953328	0.340424	NA	1	0	0	7.51021	0	0	0.859079	0	0	0.895652	12.0572	2.90982	0
APOA5	3.30492	0.103376	0.0976756	1.05836	0.28989	NA	1	0	1.77733	15.0204	0	0	0	0	0	0.895652	18.0859	3.87976	0
APOB	3.79478	0.0385332	0.0900226	0.42804	0.668622	NA	1	0	2.66599	6.75918	0	0	5.15447	0	0	0	14.4687	16.489	0
APOBEC1	0.447076	0.0297439	0.0580661	0.512242	0.608482	NA	1	0	0.888663	0	0	0	0.859079	0	0	0	3.61717	0	0
APOBEC2	1.12019	0.0678402	0.0736565	0.921035	0.357032	NA	1	0	0	3.00408	1.02824	0	0	0	0	0	8.44007	0.96994	0
APOBEC3A	1.4367	0.00688184	0.111092	0.0619475	0.950605	NA	1	0	0.888663	5.25714	1.02824	1.58537	1.71816	0	0	0	4.8229	1.93988	0
APOBEC3AP1	0.263539	0.0301218	0.0580207	0.519156	0.603652	NA	1	0	0	0.751021	0	0	0	0	0	0	2.41145	0	0
ZSWIM6	971.949	-0.649875	0.0702009	-9.25736	2.09542e-20	1.76527e-18	1.76527e-18	1271.74	1229.02	1185.11	1123.87	1082.81	1127.97	822.511	678.56	834.748	742.726	879.736	684.592
APOBEC3B-AS1	1.57074	0.0106339	0.117468	0.090526	0.927869	NA	1	0	2.66599	3.7551	2.05648	2.37806	0.859079	1.10553	0	0	6.02862	0	0
VCAN	446.894	2.19753	0.237732	9.24373	2.38053e-20	1.99387e-18	1.99387e-18	86.7095	72.8704	86.3674	73.0051	53.11	67.8672	1427.23	995.31	514.104	381.009	974.79	630.349
APOBEC3D	59.7564	0.0474044	0.230034	0.206075	0.836732	0.92394	0.92394	88.0859	54.2084	55.5755	59.6379	43.5977	65.29	70.7537	70.2416	57.3217	59.0805	45.5872	47.697
STX17	845.428	0.682743	0.0739315	9.23481	2.58754e-20	2.1548e-18	2.1548e-18	666.149	622.953	631.608	619.001	665.064	606.509	1134.27	1007.24	1094.49	1045.36	1035.9	1016.6
EZR	11314.6	-0.523606	0.056841	-9.21176	3.2082e-20	2.65639e-18	2.65639e-18	14629.1	15554.3	14589.3	9700.42	10245.5	10286.6	12933.5	6490.06	13057.7	6961.85	13856.6	7469.72
APOBEC3H	6.47219	0.14867	0.190574	0.780118	0.435321	NA	1	0	4.44332	8.26123	2.05648	8.71955	4.29539	17.6884	13.2531	2.68696	9.64579	1.93988	4.67618
MRPL41	504.46	-0.932824	0.101901	-9.15418	5.4774e-20	4.50952e-18	4.50952e-18	646.881	663.831	601.567	683.78	714.21	719.049	281.909	343.256	334.078	337.603	332.689	394.669
NCBP3	2138.59	-0.522521	0.0571142	-9.14869	5.76263e-20	4.71755e-18	4.71755e-18	2771.95	2689.09	2623.31	2428.7	2388.36	2285.15	1851.76	1669.89	1811.9	1536.09	1897.2	1709.61
APOC2	2.08446	-0.062578	0.144817	-0.432117	0.665657	NA	1	1.37634	0.888663	5.25714	1.02824	3.96343	1.71816	1.10553	2.65063	0	1.20572	5.81964	0
APOC3	1.60561	0.0348672	0.0768947	0.453441	0.650231	NA	1	0	0	6.75918	0	0	0	0	0	0.895652	4.8229	6.78958	0
APOC4	0.163062	0.0174606	0.0580207	0.300938	0.763461	NA	1	0	0	0.751021	0	0	0	0	0	0	1.20572	0	0
APOC4-APOC2	0.814251	0.0491395	0.0825334	0.59539	0.551583	NA	1	0	0	1.50204	0	0.792686	1.71816	0	0	0	4.8229	0	0.935235
APOD	3.55819	0.122512	0.1101	1.11273	0.265825	NA	1	0	3.55465	9.76327	0	0	0	0	0	0.895652	16.8801	10.6693	0.935235
APOE	14.823	0.0672563	0.250307	0.268695	0.788165	NA	1	6.88171	9.77529	18.7755	18.5083	16.6464	21.477	5.52763	25.181	12.5391	26.5259	3.87976	12.1581
APOF	0.74487	0.0540286	0.0592691	0.911581	0.361989	NA	1	0	0	0	0	0	0	0	0	0	6.02862	2.90982	0
APOH	1.05897	0.0360366	0.0609512	0.591237	0.554362	NA	1	0	0	3.7551	0	0	1.71816	0	0	0	7.23435	0	0
APOL1	80.7214	0.402609	0.223099	1.80462	0.0711341	0.207725	0.207725	52.301	79.9797	57.8286	76.0898	77.6832	87.626	63.015	117.953	83.2956	138.658	39.7675	94.4588
APOL2	336.448	0.0682617	0.129752	0.526093	0.598823	0.78326	0.78326	330.322	314.587	295.151	322.867	354.331	373.699	326.13	357.835	358.261	383.42	255.094	365.677
APOL3	202.733	0.235359	0.169412	1.38927	0.16475	0.369427	0.369427	139.011	169.735	153.959	199.479	214.818	264.596	174.673	292.894	129.87	218.236	168.77	306.757
APOL4	5.72886	0.208628	0.169856	1.22827	0.219347	NA	1	1.37634	5.33198	6.75918	5.1412	4.75612	4.29539	1.10553	2.65063	0.895652	32.5546	3.87976	0
APOL5	1.37264	0.0302831	0.0866614	0.349441	0.726758	NA	1	0	0	8.26123	0	0	1.71816	0	0	0	3.61717	1.93988	0.935235
CLEC9A	433.147	1.31916	0.144637	9.1205	7.47796e-20	6.0874e-18	6.0874e-18	209.204	205.281	204.278	220.043	226.708	242.26	780.501	760.73	603.669	517.256	623.671	604.162
ENSG00000241207	33.0026	-2.28838	0.251072	-9.11443	7.90815e-20	6.40163e-18	6.40163e-18	57.8063	68.4271	54.0735	57.5815	65.0003	84.1897	0	3.97594	0.895652	1.20572	1.93988	0.935235
APOM	22.0041	0.0712755	0.248376	0.286967	0.774138	0.89181	0.89181	23.3978	22.2166	18.7755	21.593	21.4025	19.7588	21.005	18.5544	19.7043	28.9374	28.1283	20.5752
APOO	188.152	-0.256559	0.158473	-1.61894	0.105459	0.272339	0.272339	198.193	203.504	194.514	216.959	260.001	215.629	126.03	159.038	146.887	235.116	127.062	174.889
APOOL	821.725	0.143254	0.102081	1.40333	0.160517	0.363025	0.363025	851.955	862.003	746.514	724.909	887.016	706.163	811.456	877.357	878.635	815.07	818.629	880.992
APOOP1	0.438071	0.0425526	0.0580487	0.73305	0.463528	NA	1	0	0.888663	0.751021	0	0	0	0	0	0	3.61717	0	0
APOOP4	0.440623	0.0280307	0.0582216	0.481449	0.630197	NA	1	0	2.66599	0.751021	0	0	0	0	0	0	0	0	1.87047
APOOP5	0.412232	0.0310651	0.0591584	0.525117	0.599502	NA	1	0	0.888663	0.751021	0	0	0	0	0	0.895652	2.41145	0	0
DLX1	121.677	1.77568	0.195859	9.06613	1.23323e-19	9.92747e-18	9.92747e-18	31.6559	35.5465	45.8123	59.6379	45.9758	63.5718	116.08	227.954	166.591	224.265	149.371	293.664
APPAT	32.5386	-0.0750883	0.247946	-0.302841	0.762011	0.884961	0.884961	39.9139	38.2125	33.7959	32.9037	26.1586	43.813	32.0603	23.8556	17.913	44.6118	31.0381	26.1866
APPBP2	732.176	0.0103563	0.113494	0.0912497	0.927294	0.965473	0.965473	719.827	731.37	630.106	779.406	760.979	670.081	885.526	772.658	712.939	728.257	668.289	726.678
APPBP2-DT	15.525	-0.00727002	0.251288	-0.028931	0.97692	NA	1	8.25805	14.2186	23.2816	19.5366	15.061	12.0271	26.5326	18.5544	12.5391	14.4687	8.72946	13.0933
APP-DT	2.24898	0.0258798	0.0968343	0.267259	0.78927	NA	1	0	0.888663	6.75918	0	0	5.15447	0	0	0.895652	8.44007	4.8497	0
APPL1	2283.57	0.0651481	0.0521298	1.24973	0.211399	0.432101	0.432101	2220.04	2224.32	2286.11	2168.56	2162.45	2172.61	2581.4	2340.5	2394.97	2172.72	2385.08	2294.13
GBP1	525	0.907182	0.10017	9.05645	1.34768e-19	1.07889e-17	1.07889e-17	312.43	320.807	292.147	409.24	390.002	402.908	687.637	825.67	595.609	769.252	573.235	721.066
APRG1	29.2015	0.1584	0.242234	0.653913	0.513168	0.720987	0.720987	24.7741	28.4372	26.2857	22.6213	27.744	28.3496	33.1658	25.181	24.1826	36.1717	41.7074	31.798
EVI2B	1309.18	0.743065	0.0820549	9.05571	1.35679e-19	1.08021e-17	1.08021e-17	1019.87	1117.94	1034.91	854.468	835.491	935.537	1804.22	1524.11	1759.96	1339.56	1893.32	1590.84
APTR	121.631	-0.0754103	0.181754	-0.414904	0.678212	0.833882	0.833882	140.387	140.409	113.404	135.728	126.037	102.23	144.824	120.603	116.435	112.132	97.9639	109.423
APTX	683.753	-0.114766	0.097943	-1.17176	0.241294	0.470511	0.470511	692.3	760.696	770.547	706.401	726.1	682.967	574.873	580.487	683.382	701.731	662.469	663.082
AQP1	3.1627	0.000170834	0.192416	0.000887837	0.999292	NA	1	0	2.66599	3.00408	2.05648	4.75612	4.29539	3.31658	1.32531	3.58261	7.23435	2.90982	2.80571
AQP10	3.6419	0.18217	0.122716	1.48448	0.137681	NA	1	0	4.44332	6.75918	1.02824	0	2.57724	0	0	0	24.1145	2.90982	1.87047
AQP11	4.46806	-0.0264755	0.158336	-0.167211	0.867204	NA	1	1.37634	2.66599	9.76327	3.08472	1.58537	12.8862	1.10553	0	0.895652	14.4687	4.8497	0.935235
AQP12A	1.61709	0.0545493	0.116314	0.468982	0.639082	NA	1	0	3.55465	7.51021	0	0.792686	0.859079	0	0	0.895652	4.8229	0.96994	0
AQP12B	1.35579	0.022802	0.0905211	0.251896	0.801121	NA	1	0	1.77733	8.26123	0	0	1.71816	0	0	0.895652	3.61717	0	0
AQP2	4.19658	0.148444	0.107492	1.38097	0.167287	NA	1	0	0.888663	9.01225	0	0	3.43631	0	0	0	26.5259	5.81964	4.67618
AQP3	19.1836	0.519765	0.24886	2.08858	0.0367453	0.128299	0.128299	9.63439	8.88663	23.2816	4.11296	9.51223	6.01355	23.216	10.6025	44.7826	32.5546	41.7074	15.899
AQP4	0.688735	0.0460533	0.0590612	0.779756	0.435535	NA	1	0	0	1.50204	0	0	0	0	0	0	4.8229	1.93988	0
AQP4-AS1	3.88828	0.183735	0.162371	1.13157	0.257814	NA	1	0	7.1093	15.7714	1.02824	0.792686	0.859079	1.10553	0	1.7913	9.64579	3.87976	4.67618
AQP5	1.96517	0.0799478	0.0891829	0.896448	0.370013	NA	1	0	0.888663	6.00816	0	0	1.71816	0	0	0	12.0572	2.90982	0
AQP5-AS1	1.03336	0.0574537	0.0718951	0.799133	0.424214	NA	1	0	0	4.50612	0	0	0	0	0	0.895652	6.02862	0.96994	0
AQP6	6.27397	0.111056	0.109529	1.01395	0.310607	NA	1	0	0.888663	24.7837	0	0	3.43631	0	1.32531	0.895652	31.3488	12.6092	0
AQP7	5.82045	0.164984	0.12952	1.27381	0.202729	NA	1	0	1.77733	18.7755	0	0.792686	4.29539	0	1.32531	0.895652	31.3488	9.6994	0.935235
AQP7B	4.14194	0.0851195	0.100171	0.849739	0.39547	NA	1	0	0.888663	11.2653	0	0	2.57724	0	0	0.895652	20.4973	13.5792	0
AQP7P1	1.87959	0.188035	0.131518	1.42973	0.152793	NA	1	1.37634	1.77733	3.7551	0	0	0	1.10553	1.32531	0.895652	8.44007	3.87976	0
AQP7P2	0.311173	0.0174606	0.0580207	0.300938	0.763461	NA	1	0	1.77733	0.751021	0	0	0	0	0	0	1.20572	0	0
AQP8	2.76627	0.171384	0.141817	1.20849	0.226859	NA	1	1.37634	2.66599	6.75918	0	0.792686	1.71816	1.10553	0	0	12.0572	4.8497	1.87047
AQP9	0.505701	0.0184191	0.0632421	0.291247	0.770863	NA	1	0	0.888663	3.00408	0	0	0	0	0	0	1.20572	0.96994	0
AQR	1965.04	0.0875373	0.0747999	1.17029	0.241886	0.471345	0.471345	1954.41	1943.51	1771.66	2064.71	1916.71	1780.01	2148.04	2109.9	1914.9	1953.27	1959.28	2064.06
AR	4.8444	0.095279	0.122454	0.778082	0.436521	NA	1	1.37634	3.55465	15.0204	0	0	4.29539	0	1.32531	0.895652	18.0859	13.5792	0
BAHCC1	1978.46	1.27148	0.14042	9.05486	1.36747e-19	1.08276e-17	1.08276e-17	1145.12	1037.07	1051.43	1023.1	1074.88	935.537	2626.73	2583.04	4131.64	3026.37	2777.91	2328.74
ARAFP1	0.225647	0.0174606	0.0580207	0.300938	0.763461	NA	1	0	0	1.50204	0	0	0	0	0	0	1.20572	0	0
PYGL	119.065	2.23032	0.246371	9.0527	1.39472e-19	1.09834e-17	1.09834e-17	15.1398	15.1073	17.2735	21.593	26.9513	19.7588	105.025	243.858	149.574	157.95	235.695	420.856
ARAP1-AS1	0.662	0.0224773	0.0770212	0.291833	0.770415	NA	1	0	0	3.00408	0	0	0.859079	0	0	0	1.20572	1.93988	0.935235
ARAP1-AS2	2.68851	0.246843	0.150382	1.64144	0.100707	NA	1	0	0.888663	2.25306	0	0.792686	1.71816	1.10553	2.65063	0.895652	13.263	7.75952	0.935235
ARAP2	1004.54	0.033339	0.106553	0.312886	0.754367	0.881541	0.881541	1204.3	1089.5	1018.38	851.383	799.82	694.995	1449.34	825.67	1218.98	722.229	1327.85	851.999
ARAP3	11.529	0.222865	0.14555	1.53119	0.125723	NA	1	2.75268	6.22064	33.0449	5.1412	3.17074	3.43631	1.10553	0	0	69.932	12.6092	0.935235
ARC	7.3962	0.0817625	0.113361	0.721255	0.470752	NA	1	0	0.888663	21.7796	0	0	6.01355	0	0	3.58261	26.5259	27.1583	2.80571
SMIM24	177.022	-1.4329	0.158642	-9.03231	1.68086e-19	1.31652e-17	1.31652e-17	271.139	330.583	312.425	197.422	210.854	229.374	137.085	72.8922	116.435	61.4919	113.483	71.0779
AREG	102.774	0.319943	0.245624	1.30257	0.19272	0.407607	0.407607	94.9676	90.6436	66.0898	3.08472	4.75612	3.43631	331.658	10.6025	293.774	8.44007	323.96	1.87047
TANC2	721.432	0.96413	0.107035	9.00766	2.10509e-19	1.63993e-17	1.63993e-17	407.397	395.455	410.808	469.906	421.709	356.518	1182.91	878.683	1154.5	788.544	1345.31	845.453
ARF1	5024.9	-0.0647615	0.0801437	-0.808068	0.419052	0.645404	0.645404	5345.71	5387.08	4623.28	5436.31	5555.14	4875.27	4647.63	5219.08	5022.82	4807.22	4253.19	5126.02
ARF1P1	0.275009	0.0301218	0.0580207	0.519156	0.603652	NA	1	0	0.888663	0	0	0	0	0	0	0	2.41145	0	0
ARF1P2	2.58235	-0.104464	0.175027	-0.596843	0.550612	NA	1	0	6.22064	3.7551	2.05648	2.37806	1.71816	3.31658	0	3.58261	1.20572	5.81964	0.935235
ARF1P3	0.975562	0.0338097	0.0600276	0.563236	0.573274	NA	1	0	0	3.00408	0	0	0	0	0	0	4.8229	3.87976	0
IGLL5	59.5054	2.26516	0.251916	8.99175	2.43318e-19	1.88539e-17	1.88539e-17	6.88171	2.66599	3.7551	10.2824	9.51223	10.3089	91.7587	214.701	42.9913	88.0179	61.1062	172.083
ARF4	1979.78	0.0388276	0.0852816	0.455287	0.648903	0.816276	0.816276	2118.19	1919.51	1871.54	2108.92	2020.56	1792.04	1901.5	2031.71	2152.25	2069.02	1785.66	1986.44
ARF4-AS1	22.944	0.143709	0.253072	0.567856	0.570132	0.76295	0.76295	11.0107	17.7733	18.7755	26.7342	19.0245	17.1816	23.216	14.5784	33.1391	33.7603	33.9479	26.1866
ARF4P1	0.867817	-0.0322772	0.105474	-0.306022	0.759588	NA	1	0	0	0	3.08472	0.792686	0.859079	2.21105	1.32531	0	1.20572	0	0.935235
ARF4P2	0.736717	0.0370269	0.0889128	0.416441	0.677088	NA	1	0	0.888663	0.751021	0	0	1.71816	0	0	0.895652	3.61717	0.96994	0
ARF4P3	0.174532	0.0174606	0.0580207	0.300938	0.763461	NA	1	0	0.888663	0	0	0	0	0	0	0	1.20572	0	0
ARF4P4	0.403652	0.0181709	0.0588154	0.308947	0.757362	NA	1	0	0.888663	0.751021	0	0.792686	0	0	0	0	2.41145	0	0
ARF5	1002.78	-0.0656459	0.0866445	-0.757647	0.448662	0.670011	0.670011	1052.9	1062.84	916.245	967.574	1019.39	986.222	1100	983.382	1119.56	891.03	970.91	963.292
ARF6	3686.76	0.0764677	0.0460424	1.66081	0.0967513	0.257598	0.257598	3585.37	3766.15	3511.02	3561.82	3530.62	3557.44	3812.96	3851.36	3895.19	3571.36	3787.62	3810.15
ARFGAP1	1047.52	0.0209022	0.0997726	0.209498	0.834059	0.922938	0.922938	1116.21	1116.16	944.033	963.461	1069.33	988.799	1198.39	1070.85	1055.97	907.91	1050.44	1088.61
ARFGAP2	2317.23	0.0962386	0.0675444	1.42482	0.154209	0.352222	0.352222	2247.57	2347.85	2128.39	2309.43	2288.48	2223.3	2416.68	2536.65	2369	2241.44	2177.52	2520.46
ARFGAP3	634.743	-0.0246833	0.104985	-0.235113	0.814121	0.913546	0.913546	648.257	718.04	634.612	686.865	676.161	577.301	601.406	654.705	615.313	566.69	555.776	681.786
GDF11	1929.5	-1.04224	0.116237	-8.96652	3.06042e-19	2.3588e-17	2.3588e-17	2507.69	2485.59	2527.94	2679.59	2606.35	2846.99	954.069	1149.05	1375.72	1247.92	1387.01	1386.02
ARFGEF1-DT	7.36339	0.316177	0.240859	1.31271	0.189282	NA	1	8.25805	5.33198	9.01225	3.08472	2.37806	5.15447	13.2663	7.95188	10.7478	6.02862	8.72946	8.41712
ARFGEF2	1573.78	0.184769	0.0906279	2.03877	0.0414733	0.140902	0.140902	1567.65	1481.4	1375.12	1482.72	1458.54	1324.7	1859.49	1809.05	1773.39	1428.78	1691.58	1632.92
AEBP1	1815.27	-0.827113	0.0923162	-8.95957	3.25948e-19	2.49893e-17	2.49893e-17	2420.98	2388.73	2104.36	2261.1	2452.57	2372.77	1386.33	1349.17	1370.35	1212.96	1111.55	1352.35
TRHDE	2747.4	-0.730573	0.0817618	-8.93539	4.05761e-19	3.09446e-17	3.09446e-17	3256.42	3125.43	2925.98	4057.44	3648.73	3452.64	2051.86	2348.45	1875.5	1981	1943.76	2301.61
ARFIP2	924.672	-0.0742711	0.0738686	-1.00545	0.314681	0.548967	0.548967	964.816	960.645	937.274	967.574	894.943	1005.98	897.687	902.538	910.878	872.944	838.998	941.782
ARFRP1	654.205	0.0173206	0.111508	0.155331	0.876561	0.942867	0.942867	777.633	679.827	648.131	669.384	654.759	583.314	713.064	632.174	640.391	616.125	554.806	680.851
ARG2	1.68021	0.189621	0.12526	1.51382	0.130071	NA	1	1.37634	0.888663	3.00408	1.02824	0.792686	0	0	1.32531	0.895652	10.8515	0	0
ARGFX	2.71013	0.166971	0.122898	1.35861	0.174269	NA	1	0	0.888663	7.51021	0	0	1.71816	0	0	1.7913	12.0572	3.87976	4.67618
ARGFXP1	0.252895	0.0047995	0.0580207	0.0827205	0.934074	NA	1	0	0	0	0	0	0.859079	0	0	0	1.20572	0.96994	0
ARGFXP2	0.966878	0.0769225	0.0599477	1.28316	0.199436	NA	1	0	0	0.751021	0	0	0	0	0	0	10.8515	0	0
ARGLU1	4362.55	0.068585	0.0788337	0.869996	0.384303	0.615785	0.615785	4325.84	3899.45	3972.15	4165.4	4240.08	4541.95	4931.75	4889.08	4506.92	4111.52	4170.74	4595.75
ARHGAP1	1308.68	0.0936237	0.0813456	1.15094	0.249758	0.480179	0.480179	1264.86	1189.92	1132.54	1305.87	1326.96	1184.67	1283.52	1358.45	1536.04	1334.74	1400.59	1386.02
ARHGAP10	357.448	0.0488286	0.110103	0.443479	0.657419	0.821269	0.821269	378.494	384.791	387.527	348.573	332.928	300.677	416.783	335.304	343.93	330.368	380.216	349.778
ARHGAP11A	1177.4	0.21702	0.118066	1.83813	0.0660431	0.196987	0.196987	1052.9	1017.52	955.298	1273.99	1174.76	1090.17	1343.21	1553.27	1055.97	1192.46	1014.56	1404.72
ARHGAP11A-DT	9.35676	0.160804	0.244155	0.658615	0.510143	NA	1	6.88171	5.33198	7.51021	9.25416	3.17074	10.3089	14.3718	5.30125	14.3304	12.0572	10.6693	13.0933
ARHGAP11A-SCG5	10.698	0.56579	0.252098	2.24432	0.0248116	NA	1	8.25805	7.99797	6.75918	3.08472	5.5488	6.87263	18.7939	11.9278	16.1217	14.4687	13.5792	14.9638
ARHGAP11B	53.0329	0.0958844	0.229967	0.416948	0.676717	0.83303	0.83303	53.6773	40.8785	56.3265	48.3273	40.427	61.8537	57.4873	70.2416	51.9478	36.1717	60.1363	58.9198
ARHGAP11B-DT	28.3702	-0.132058	0.251665	-0.524739	0.599765	0.783918	0.783918	20.6451	19.5506	28.5388	26.7342	25.366	30.0677	57.4873	13.2531	32.2435	26.5259	31.0381	28.9923
ARHGAP12	540.128	0.134181	0.121269	1.10648	0.26852	0.499725	0.499725	549.16	484.321	468.637	521.318	503.356	494.829	664.421	622.897	527.539	472.644	590.693	581.716
ARHGAP15	510.724	-0.216931	0.130161	-1.66663	0.0955872	0.255419	0.255419	502.365	512.759	406.302	619.001	580.246	530.911	591.456	514.222	469.322	450.941	445.202	505.962
ARHGAP15-AS1	0.377832	-0.0209107	0.0580673	-0.360112	0.718763	NA	1	0	0	0.751021	0	0	2.57724	0	0	0	1.20572	0	0
ARHGAP16P	0.400762	0.0299666	0.0580396	0.516313	0.605636	NA	1	0	0	1.50204	0	0	0	0	0	0.895652	2.41145	0	0
ABTB3	107.368	-1.7648	0.197639	-8.92943	4.28218e-19	3.24863e-17	3.24863e-17	136.258	133.299	161.469	203.592	192.623	217.347	27.6381	30.4822	35.8261	56.669	43.6473	49.5675
ARHGAP18	525.112	0.133724	0.0895375	1.4935	0.135307	0.322838	0.322838	506.494	500.317	509.943	468.878	465.307	484.52	606.934	512.896	555.304	547.399	641.13	502.221
ARHGAP19	1096.89	0.196043	0.0885702	2.21342	0.026869	0.101362	0.101362	1077.68	957.979	907.984	1141.35	1162.08	1066.98	1084.52	1312.06	951.182	1206.93	936.962	1357.03
ARHGAP19-SLIT1	3.08999	0.268729	0.160944	1.66971	0.0949766	NA	1	5.50537	1.77733	6.75918	0	0	0.859079	3.31658	1.32531	0	10.8515	3.87976	2.80571
ARHGAP20	9.23108	-0.434401	0.221631	-1.96002	0.0499939	NA	1	11.0107	10.664	12.7673	15.4236	11.0976	15.4634	4.4221	1.32531	5.37391	9.64579	13.5792	0
ARHGAP21	1900.36	0.0249411	0.0808145	0.308622	0.757609	0.88279	0.88279	1935.14	1743.56	1776.91	1989.64	1834.28	1947.53	1870.55	2009.17	1725.03	1848.38	2109.62	2014.5
ARHGAP22	10.2228	0.207846	0.143595	1.44744	0.147773	NA	1	1.37634	7.1093	24.0327	0	1.58537	9.44986	0	1.32531	0.895652	56.669	16.489	3.74094
ARHGAP22-IT1	0.200954	0.0301218	0.0580207	0.519156	0.603652	NA	1	0	0	0	0	0	0	0	0	0	2.41145	0	0
CAST	1419.76	0.696674	0.0782839	8.89933	5.61834e-19	4.24009e-17	4.24009e-17	1168.51	1157.93	1093.49	964.489	965.492	967.322	2205.52	1608.93	1830.71	1505.95	1932.12	1636.66
ARHGAP23P1	4.29131	0.0119385	0.166552	0.0716799	0.942857	NA	1	11.0107	6.22064	15.7714	1.02824	0.792686	2.57724	4.4221	0	0	4.8229	4.8497	0
ARHGAP24	2.88129	0.20405	0.139817	1.45941	0.144453	NA	1	0	2.66599	9.76327	1.02824	0	0	0	2.65063	0.895652	10.8515	4.8497	1.87047
FAM171A1	64.1767	-1.96397	0.221155	-8.88053	6.65442e-19	4.99599e-17	4.99599e-17	83.9568	85.3117	87.1184	136.756	132.379	145.184	12.1608	13.2531	8.06087	33.7603	10.6693	21.5104
ARHGAP26	387.708	-0.0309895	0.114318	-0.271082	0.786328	0.898855	0.898855	436.3	420.338	410.808	374.279	369.392	326.45	404.622	303.497	456.783	383.42	410.285	356.325
ARHGAP26-AS1	0.382259	0.0427829	0.0580207	0.737374	0.460895	NA	1	0	0	0	0	0	0	0	0	0	3.61717	0.96994	0
ARHGAP26-IT1	0.841093	0.0100448	0.0949113	0.105833	0.915714	NA	1	0	0	0	1.02824	0	1.71816	2.21105	1.32531	0	0	1.93988	1.87047
ARHGAP27	1102.7	0.175345	0.0860694	2.03726	0.0416244	0.141383	0.141383	1103.83	1133.05	1029.65	924.388	1002.75	981.068	1377.49	1151.7	1137.48	1030.89	1244.43	1115.74
ARHGAP27P1-BPTFP1-KPNA2P3	23.0977	0.171632	0.250675	0.684679	0.493547	0.705832	0.705832	30.2795	27.5486	28.5388	16.4518	19.0245	19.7588	17.6884	25.181	23.287	13.263	27.1583	28.9923
ARHGAP27P2	9.01129	-0.0635577	0.24128	-0.263419	0.792228	NA	1	8.25805	8.88663	6.75918	12.3389	13.4757	4.29539	13.2663	7.95188	6.26956	13.263	7.75952	5.61141
ARHGAP28	20.7929	0.0976963	0.254518	0.383848	0.701091	0.849233	0.849233	19.2688	23.9939	29.2898	15.4236	16.6464	25.7724	15.4774	19.8797	14.3304	34.966	22.3086	12.1581
ARHGAP28-AS1	1.26594	0.0733429	0.122207	0.600154	0.548403	NA	1	0	3.55465	1.50204	0	0.792686	1.71816	0	0	0.895652	4.8229	0.96994	0.935235
ARHGAP29	6.70406	0.0988363	0.127204	0.776992	0.437164	NA	1	0	2.66599	18.0245	1.02824	0	7.73171	0	0	4.47826	25.3202	17.4589	3.74094
ARHGAP29-AS1	1.42245	0.11823	0.113338	1.04317	0.296871	NA	1	0	1.77733	2.25306	0	0	1.71816	0	1.32531	1.7913	7.23435	0.96994	0
ARHGAP30	3882.73	-0.0757256	0.0717426	-1.05552	0.291188	0.524499	0.524499	3560.6	4153.61	3659.72	3970.04	4288.43	4005.02	3817.38	3964.01	3981.17	3659.37	3532.52	4000.94
ARHGAP31	27.0232	-0.164047	0.252841	-0.648817	0.516457	0.723879	0.723879	24.7741	38.2125	46.5633	20.5648	16.6464	24.9133	43.1155	10.6025	27.7652	24.1145	32.978	14.0285
ARHGAP31-AS1	0.6186	0.0542204	0.0664959	0.815394	0.414847	NA	1	0	0	1.50204	0	0	0.859079	0	2.65063	0	2.41145	0	0
ANKRD33B	2086.68	1.08208	0.122252	8.85119	8.65893e-19	6.46741e-17	6.46741e-17	1725.93	1670.69	1678.53	978.885	973.418	832.447	4025.22	2229.18	3074.77	1668.72	3881.7	2300.68
ARHGAP33	904.301	-0.129631	0.10206	-1.27015	0.204032	0.422788	0.422788	1299.27	1230.8	1260.21	619.001	688.844	771.453	1116.58	595.066	937.748	606.479	1037.84	688.333
ARHGAP35	3370.51	-0.0170822	0.0591924	-0.288588	0.772897	0.891362	0.891362	3279.82	3459.57	3530.55	3555.65	3296.78	3328.07	3344.22	3306.66	3240.47	3152.97	3363.75	3587.56
ARHGAP36	3.24728	0.0873557	0.110267	0.792219	0.428233	NA	1	0	0.888663	10.5143	0	0	2.57724	0	1.32531	0	12.0572	10.6693	0.935235
ARHGAP39	16.0513	0.136195	0.13946	0.976586	0.328774	NA	1	5.50537	2.66599	47.3143	4.11296	0.792686	16.3225	0	0	0.895652	68.7263	38.7976	7.48188
ARHGAP4	3782.01	0.131316	0.086822	1.51247	0.130413	0.314948	0.314948	3678.96	3541.32	3179.07	3659.51	3763.67	3689.74	4172.25	4381.49	3714.27	3496.6	3779.86	4327.33
ARHGAP40	4.26662	0.0789212	0.0908709	0.868497	0.385122	NA	1	0	1.77733	9.01225	0	0	5.15447	0	0	0	26.5259	8.72946	0
ARHGAP42	269.674	-0.0617319	0.139129	-0.443703	0.657258	0.821269	0.821269	339.956	277.263	305.665	260.145	237.013	207.897	354.874	235.906	294.67	224.265	286.132	212.298
ARHGAP42-AS1	4.47818	-0.115659	0.207931	-0.556235	0.57805	NA	1	2.75268	5.33198	2.25306	1.02824	4.75612	6.87263	8.84421	1.32531	8.06087	4.8229	5.81964	1.87047
ARHGAP42P1	0.463747	0.0451245	0.0731349	0.617004	0.537232	NA	1	0	1.77733	0.751021	0	0	0	0	0	0.895652	1.20572	0	0.935235
ARHGAP42P2	0.677591	-0.0320893	0.0995808	-0.322244	0.747268	NA	1	1.37634	0	0.751021	1.02824	1.58537	0.859079	0	1.32531	0	1.20572	0	0
ARHGAP42P3	0.12517	0	0.0580207	0	1	NA	1	0	0	1.50204	0	0	0	0	0	0	0	0	0
ARHGAP42P4	0.181305	0.0174606	0.0580207	0.300938	0.763461	NA	1	0	0	0	0	0	0	0	0	0	1.20572	0.96994	0
ARHGAP42P5	0.870712	0.0777862	0.0846049	0.919406	0.357883	NA	1	1.37634	1.77733	1.50204	0	0	0	0	0	0	4.8229	0.96994	0
ESYT1	4588.7	-0.579843	0.0656184	-8.83659	9.8684e-19	7.33298e-17	7.33298e-17	5399.39	5445.73	5200.07	5403.4	5626.49	5641.57	3796.38	3713.53	3943.56	3357.94	3536.4	4000
ARHGAP44-AS1	1.6459	0.0607335	0.131263	0.462686	0.643589	NA	1	0	2.66599	9.01225	0	0	0.859079	1.10553	0	1.7913	2.41145	0.96994	0.935235
ARHGAP45	3735.51	0.105235	0.093065	1.13076	0.258154	0.489294	0.489294	3515.18	3703.95	3278.96	3633.8	3690.75	3555.73	4354.67	4214.5	3622.02	3339.86	3738.15	4178.63
ARHGAP5	2780.64	0.0724657	0.0815756	0.888325	0.374366	0.605805	0.605805	3116.04	2990.35	2758.5	2502.74	2389.95	2162.3	3631.65	2617.49	3159.86	2288.46	3229.9	2520.46
ARHGAP5-AS1	58.0634	0.076014	0.210354	0.361362	0.717829	0.859047	0.859047	72.9461	63.9837	57.8286	47.2991	35.6709	43.813	71.8592	46.386	79.713	42.2003	89.2345	45.8265
ARHGAP6	6.07496	0.171107	0.126441	1.35326	0.175973	NA	1	0	3.55465	19.5265	0	0	1.71816	1.10553	0	0.895652	32.5546	12.6092	0.935235
ARHGAP8	3.15621	0.132701	0.106314	1.2482	0.21196	NA	1	0	2.66599	5.25714	0	0	2.57724	0	0	1.7913	21.703	3.87976	0
ARHGAP9	378.203	0.07153	0.119454	0.598808	0.549301	0.748168	0.748168	360.602	312.809	297.404	368.11	372.562	381.431	411.256	451.932	443.348	389.449	403.495	346.037
ARHGDIA	10146.6	-0.0948998	0.0596118	-1.59196	0.111393	0.282232	0.282232	10348.7	10782.1	10310.8	10029.5	10763.9	10993.6	9306.32	9521.05	10434.3	10159.4	9053.42	10055.6
ARHGDIB	17128	0.0252491	0.0489941	0.515351	0.606308	0.788211	0.788211	15538.9	16606.4	15911.9	16494	16988.1	17584.5	17989.1	17824.1	19166.1	17389	17270.8	16773.4
ARHGDIG	3.2581	0.104337	0.103018	1.0128	0.311153	NA	1	0	0	6.00816	0	0	2.57724	0	0	1.7913	18.0859	9.6994	0.935235
MMP16	490.773	1.13074	0.128072	8.82889	1.05723e-18	7.81598e-17	7.81598e-17	280.774	211.502	214.792	353.715	330.55	314.423	697.587	869.405	597.4	721.023	575.174	722.937
ARHGEF10	10.559	0.301478	0.204228	1.47618	0.139895	NA	1	4.12902	6.22064	24.7837	4.11296	0.792686	3.43631	13.2663	2.65063	17.913	30.1431	15.519	3.74094
ARHGEF10L	13.0893	0.114795	0.0993954	1.15493	0.248119	NA	1	0	3.55465	32.2939	0	0	7.73171	3.31658	0	0.895652	83.195	23.2786	2.80571
ARID1B	9289.55	0.539092	0.0610831	8.82555	1.0892e-18	8.01146e-17	8.01146e-17	8297.96	7996.19	8008.13	6593.08	6263.8	6136.4	13810.2	9628.4	12394.9	8651.07	14226.1	9468.32
ARHGEF12	3677.72	-0.123749	0.11599	-1.06689	0.28602	0.518564	0.518564	4073.97	3715.5	3639.45	4217.84	3679.65	3352.12	4427.63	3751.96	3161.65	3050.48	3592.66	3469.72
ARHGEF15	7.26527	0.0834004	0.116008	0.718919	0.472191	NA	1	0	0.888663	26.2857	0	0	8.59079	0	1.32531	1.7913	28.9374	18.4289	0.935235
ARHGEF16	13.1789	0.0282316	0.155216	0.181886	0.855673	NA	1	4.12902	11.5526	36.8	6.16944	7.92686	18.0406	1.10553	0	0.895652	38.5832	32.008	0.935235
ARHGEF17	48.2866	0.222345	0.253051	0.87866	0.379586	0.610862	0.610862	48.172	39.1012	74.351	48.3273	35.6709	50.6856	27.6381	39.7594	30.4522	101.281	47.5271	36.4742
ARHGEF17-AS1	5.79806	0.0552596	0.132172	0.418089	0.675882	NA	1	1.37634	0	17.2735	0	0.792686	6.87263	1.10553	0	4.47826	14.4687	21.3387	1.87047
ARHGEF18	1078.55	-0.0541837	0.111648	-0.48531	0.627457	0.803522	0.803522	1110.71	1114.38	934.27	898.682	948.052	927.805	1680.4	933.02	1267.35	805.424	1394.77	927.753
ARHGEF18-AS1	1.20946	0.0220544	0.0849259	0.25969	0.795103	NA	1	0	0	2.25306	0	0	1.71816	1.10553	0	0	3.61717	5.81964	0
ARHGEF19	155.305	0.00533875	0.147485	0.0361985	0.971124	0.987004	0.987004	170.666	175.067	171.233	159.377	138.72	146.902	155.879	141.809	168.383	144.687	132.882	158.055
ARHGEF19-AS1	0.513098	0.0657727	0.0740658	0.88803	0.374524	NA	1	0	0	0.751021	0	0	0	0	1.32531	0	1.20572	1.93988	0.935235
ARHGEF2	2755.15	-0.151329	0.0731412	-2.06899	0.0385467	0.132986	0.132986	2901.33	2934.37	2877.16	3145.39	3190.56	3037.7	2229.85	3111.84	2134.34	2463.29	2187.21	2848.73
ARHGEF25	3.51023	0.187774	0.12236	1.5346	0.124881	NA	1	0	3.55465	11.2653	0	0	0.859079	0	0	0.895652	21.703	2.90982	0.935235
PROCR	200.035	1.26218	0.143039	8.82406	1.10387e-18	8.07831e-17	8.07831e-17	111.484	133.299	95.3796	105.909	120.488	123.707	258.693	316.75	268.696	290.58	268.673	306.757
ARHGEF26-AS1	5.64002	0.188129	0.203117	0.926208	0.354338	NA	1	5.50537	4.44332	5.25714	3.08472	8.71955	3.43631	0	9.27719	2.68696	15.6744	6.78958	2.80571
ARHGEF28	14.63	0.237366	0.229265	1.03533	0.300513	NA	1	6.88171	8.88663	20.2776	7.19768	11.0976	17.1816	13.2663	5.30125	8.06087	45.8175	20.3687	11.2228
ARHGEF2-AS2	15.3615	-0.0805799	0.239303	-0.336728	0.736322	NA	1	19.2688	6.22064	21.0286	23.6495	6.34149	18.0406	8.84421	5.30125	18.8087	20.4973	22.3086	14.0285
ARHGEF3	372.939	0.291314	0.165553	1.75964	0.0784684	0.222943	0.222943	311.053	274.597	300.408	334.178	363.05	345.35	416.783	414.823	351.096	326.751	470.421	566.753
ARHGEF33	3.59073	0.07403	0.163306	0.45332	0.650318	NA	1	0	3.55465	10.5143	2.05648	2.37806	2.57724	0	1.32531	3.58261	8.44007	6.78958	1.87047
ARHGEF34P	1.88345	0.0461928	0.0760477	0.607418	0.543574	NA	1	0	0	6.75918	0	0	1.71816	0	0	4.47826	9.64579	0	0
ARHGEF35	0.298879	0	0.0580207	0	1	NA	1	0	0	0.751021	0	0	0	0	0	0.895652	0	1.93988	0
ARHGEF35-AS1	1.02908	0.0592432	0.0725569	0.816506	0.414211	NA	1	1.37634	0	3.00408	0	0	0	0	0	0	6.02862	1.93988	0
ARHGEF37	16.9964	0.423083	0.239128	1.76927	0.0768482	0.220022	0.220022	4.12902	16.8846	27.7878	10.2824	6.34149	10.3089	12.1608	14.5784	16.1217	42.2003	30.0681	13.0933
ARHGEF38	1.55069	0.122263	0.116618	1.04841	0.294452	NA	1	1.37634	0.888663	4.50612	1.02824	0	0	0	0	0	6.02862	2.90982	1.87047
ARHGEF39	320.128	0.249172	0.13209	1.88637	0.0592445	0.181953	0.181953	286.279	268.376	288.392	300.246	321.831	282.637	339.396	397.594	285.713	315.9	378.277	376.9
ARHGEF3-AS1	0.268583	0	0.0580207	0	1	NA	1	0	0	2.25306	0	0	0	0	0	0	0	0.96994	0
ARHGEF4	12.0434	0.17465	0.138793	1.25835	0.208267	NA	1	1.37634	0.888663	29.2898	0	0.792686	10.3089	1.10553	0	6.26956	57.8748	30.0681	6.54665
ARHGEF40	378.519	0.147297	0.179592	0.820172	0.412118	0.640291	0.640291	382.623	396.344	387.527	368.11	378.904	387.444	455.477	451.932	228.391	364.129	279.343	462.006
ARHGEF4-AS1	4.09989	0.0897085	0.134976	0.664626	0.50629	NA	1	2.75268	2.66599	12.7673	1.02824	4.75612	0.859079	0	0	0	15.6744	7.75952	0.935235
ARHGEF5	3.09327	0.0811534	0.110075	0.737255	0.460968	NA	1	0	0	13.5184	0	2.37806	2.57724	1.10553	0	0.895652	15.6744	0.96994	0
BMPR2	977.976	0.807348	0.0915304	8.82055	1.13898e-18	8.29338e-17	8.29338e-17	806.536	678.05	687.935	711.542	627.015	608.228	1429.45	1198.08	1356.02	1198.49	1357.92	1076.46
ARHGEF7	1755.56	-0.0119864	0.0736941	-0.162651	0.870793	0.939388	0.939388	1958.53	1923.07	1911.35	1577.32	1667.81	1658.88	2006.53	1753.39	1718.76	1571.06	1774.99	1545.01
ARHGEF7-AS1	0.34007	0.0301218	0.0580207	0.519156	0.603652	NA	1	0	0	0	0	0	0	0	0	0	1.20572	1.93988	0.935235
ARHGEF7-AS2	1.85527	0.0552861	0.0880834	0.627657	0.530229	NA	1	0	0	1.50204	0	0.792686	0.859079	0	0	0	8.44007	10.6693	0
ARHGEF7-IT1	0.205998	0	0.0580207	0	1	NA	1	0	0	1.50204	0	0	0	0	0	0	0	0.96994	0
ARHGEF9	700.806	0.157221	0.0822268	1.91205	0.0558702	0.174662	0.174662	696.429	721.594	710.465	607.69	611.954	595.341	769.446	670.608	802.504	635.417	868.096	720.131
ARHGEF9-IT1	1.09801	-0.0334344	0.0971127	-0.344285	0.730632	NA	1	0	0	3.00408	3.08472	0	0	3.31658	0	0.895652	0	1.93988	0.935235
TMSB15A	492.268	-0.962952	0.10964	-8.78284	1.59405e-18	1.14914e-16	1.14914e-16	641.375	589.184	538.482	719.768	815.674	722.485	266.432	379.04	266.009	393.066	224.056	351.648
VPREB3	70.5475	1.79989	0.204932	8.78284	1.59396e-18	1.14914e-16	1.14914e-16	31.6559	27.5486	22.5306	21.593	29.3294	34.3631	86.231	128.555	84.1913	133.835	99.9038	146.832
MRTFA	1799.52	0.539402	0.0615056	8.76996	1.78726e-18	1.28205e-16	1.28205e-16	1461.67	1564.05	1476.51	1401.49	1410.98	1319.54	2278.49	2131.1	2363.63	1901.43	2276.45	2008.89
ARID3A	1076.28	0.17963	0.0941293	1.90833	0.0563484	0.17574	0.17574	985.461	1015.74	1131.79	960.376	1062.99	1054.95	1114.37	1195.43	952.078	1071.89	1134.83	1235.45
ARID3B	791.326	-0.211987	0.110716	-1.91469	0.0555315	0.173946	0.173946	876.73	974.863	951.543	715.655	746.71	860.797	755.074	560.607	769.365	712.583	858.397	713.584
ARID3BP1	3.36672	0.0728255	0.154861	0.470262	0.638168	NA	1	1.37634	0.888663	9.76327	3.08472	1.58537	0	2.21105	0	2.68696	7.23435	9.6994	1.87047
ARID3C	23.4847	-0.231562	0.249742	-0.927203	0.353821	0.58633	0.58633	22.0215	18.6619	24.7837	31.8754	33.2928	30.9268	16.5829	15.9038	14.3304	37.3775	14.5491	21.5104
ARID4A	821.922	0.117992	0.100057	1.17925	0.2383	0.466805	0.466805	759.741	788.244	809.6	716.683	741.161	841.038	805.928	856.152	874.156	796.984	1022.32	851.064
ARID4B	2133.36	-0.0349916	0.0617982	-0.566223	0.571242	0.76387	0.76387	2163.61	2126.57	2243.3	2004.04	2095.07	2208.69	2237.58	2022.43	2069.85	2002.71	2298.76	2127.66
YWHAQ	9962.51	-0.417936	0.0478023	-8.74303	2.2695e-18	1.61995e-16	1.61995e-16	10815.3	11213.2	10269.5	12141.5	11945	11958.4	8191.95	9250.69	8419.13	8946.47	7680.95	8718.26
SLC43A2	1068.62	1.22031	0.139802	8.72882	2.5734e-18	1.82787e-16	1.82787e-16	575.311	574.076	497.176	667.328	723.722	696.713	1577.59	2108.57	1139.27	1491.48	1127.07	1645.08
ARIH1	2088.1	0.0142226	0.0789183	0.180219	0.856981	0.932392	0.932392	2193.89	2117.68	1894.82	2070.88	2072.08	1949.25	2405.62	2161.59	2096.72	1923.13	2101.86	2069.68
ARIH2	2187.8	-0.0174146	0.0637279	-0.273265	0.78465	0.897787	0.897787	2506.32	2470.48	2336.42	2169.59	2199.7	2133.95	2091.66	2282.19	1992.83	1972.56	1927.27	2170.68
MOB3A	2861.54	0.769256	0.0882968	8.71216	2.98144e-18	2.10737e-16	2.10737e-16	1904.86	2094.58	1964.67	2200.43	2141.04	2284.29	3725.62	4233.05	3102.54	3365.18	3432.62	3889.64
ARIH2P1	1.12364	0.137465	0.121505	1.13135	0.257909	NA	1	0	0.888663	0.751021	0	0	0.859079	1.10553	1.32531	1.7913	4.8229	1.93988	0
ARL1	924.283	-0.0521741	0.0637418	-0.818524	0.413058	0.641158	0.641158	873.977	917.1	916.996	935.699	951.223	992.236	912.059	913.141	912.669	930.819	903.984	931.494
ARL10	7.76714	0.296368	0.207693	1.42695	0.153593	NA	1	2.75268	5.33198	15.0204	5.1412	3.96343	5.15447	2.21105	5.30125	3.58261	26.5259	12.6092	5.61141
SH3BGRL	1451.85	0.565813	0.0650389	8.69962	3.33012e-18	2.3424e-16	2.3424e-16	960.686	1077.95	1034.16	1193.79	1275.43	1164.91	1836.28	1822.31	1766.23	1776.03	1695.46	1819.03
ARL13A	0.343221	0	0.058031	0	1	NA	1	0	0	2.25306	0	0	0	0	0	0.895652	0	0.96994	0
TRIM8	1849.49	-0.539463	0.0620369	-8.69585	3.44251e-18	2.40976e-16	2.40976e-16	2134.71	2248.32	2013.49	2190.15	2332.08	2289.44	1379.7	1542.66	1495.74	1519.21	1451.03	1597.38
ARL14EP	721.327	-0.064332	0.0945384	-0.680486	0.496197	0.708085	0.708085	711.569	785.578	678.172	799.971	772.869	733.653	672.16	775.308	708.461	718.612	589.723	709.844
ARL14EP-DT	0.852909	-0.0258744	0.0823804	-0.314084	0.753457	NA	1	0	0	2.25306	4.11296	0.792686	0	0	0	0	1.20572	0	1.87047
ARL14EPL	0.621956	0.0196202	0.0646548	0.303461	0.761539	NA	1	0	0	2.25306	0	0	0.859079	0	0	0	2.41145	1.93988	0
ARL14EPP1	0.33609	0.0301218	0.0580207	0.519156	0.603652	NA	1	0	0	1.50204	0	0	0	0	1.32531	0	1.20572	0	0
ARL15	250.017	-0.169927	0.145303	-1.16947	0.242216	0.471798	0.471798	233.978	263.933	217.045	305.387	248.903	280.06	254.271	229.279	267.8	243.556	197.868	258.125
ARL16	521.685	-0.00050536	0.120843	-0.00418196	0.996663	0.998455	0.998455	451.44	471.88	555.004	488.414	498.6	543.797	509.647	524.824	670.843	505.198	539.287	501.286
ARL17A	72.9801	0.118321	0.198403	0.596366	0.550931	0.749013	0.749013	59.1827	71.093	72.098	57.5815	68.9637	80.7534	76.2813	90.1213	71.6522	68.7263	87.2946	72.0131
ARL17B	104.798	0.054082	0.183257	0.295116	0.767905	0.888701	0.888701	101.849	67.5384	89.3714	115.163	96.7077	109.103	113.869	99.3985	104.791	129.012	124.152	106.617
ARL2	522.312	0.183634	0.104517	1.75697	0.0789223	0.223706	0.223706	452.816	506.538	506.939	447.285	485.124	516.306	503.014	516.872	602.774	576.336	591.663	562.076
CARMIL2	637.326	0.855585	0.0984682	8.68895	3.65815e-18	2.54839e-16	2.54839e-16	436.3	464.771	437.094	375.308	407.441	428.68	977.285	796.513	1006.71	764.429	861.307	692.074
ARL2BPP1	0.301431	0.0427829	0.0580207	0.737374	0.460895	NA	1	0	0	0	0	0	0	0	0	0	3.61717	0	0
ARL2BPP10	0.918874	0.027547	0.0725502	0.379695	0.704172	NA	1	0	0	2.25306	0	0	0	4.4221	0	0	2.41145	1.93988	0
ARL2BPP3	0.234652	0.0047995	0.0580207	0.0827205	0.934074	NA	1	0	0	0.751021	0	0	0.859079	0	0	0	1.20572	0	0
ARL2BPP4	0.200954	0.0301218	0.0580207	0.519156	0.603652	NA	1	0	0	0	0	0	0	0	0	0	2.41145	0	0
ARL2BPP6	0.12517	0	0.0580207	0	1	NA	1	0	0	1.50204	0	0	0	0	0	0	0	0	0
ARL2BPP7	0.272544	0.0174606	0.0580207	0.300938	0.763461	NA	1	0	0	0	0	0	0.859079	0	0	0	2.41145	0	0
ARL2BPP8	0.263539	0.0301218	0.0580207	0.519156	0.603652	NA	1	0	0	0.751021	0	0	0	0	0	0	2.41145	0	0
ARL2-SNX15	0.342747	-0.0458451	0.0580207	-0.790151	0.42944	NA	1	0	0	0	4.11296	0	0	0	0	0	0	0	0
BACE1	288.035	-2.01104	0.231685	-8.68006	3.95547e-18	2.74233e-16	2.74233e-16	609.719	512.759	536.229	441.115	504.148	444.144	39.7989	27.8316	76.1304	81.9892	109.603	72.9483
ARL4A	40.3097	-0.358235	0.223206	-1.60495	0.108504	0.27727	0.27727	35.7849	31.1032	36.8	48.3273	55.488	47.2493	43.1155	37.1088	38.513	43.4061	37.8277	28.9923
ARL4AP2	0.186164	0.0047995	0.0580207	0.0827205	0.934074	NA	1	0	0	0	1.02824	0	0	0	0	0	1.20572	0	0
ARL4AP5	5.80017	0.102323	0.219889	0.46534	0.641688	NA	1	6.88171	1.77733	5.25714	5.1412	3.17074	8.59079	3.31658	13.2531	7.16522	3.61717	5.81964	5.61141
ARL4C	23.6129	-0.202893	0.254391	-0.797567	0.425122	0.649436	0.649436	30.2795	39.1012	44.3102	19.5366	11.0976	19.7588	40.9045	10.6025	17.913	18.0859	25.2184	6.54665
ARL4D	120.483	-0.0300692	0.177314	-0.169581	0.865339	0.937408	0.937408	140.387	136.854	129.176	153.208	122.866	109.103	105.025	123.254	94.0435	107.309	81.475	143.091
ARL5A	905.85	0.147913	0.122129	1.21113	0.225846	0.451195	0.451195	847.826	846.007	730.743	971.687	968.662	786.057	1034.77	1078.8	894.756	983.871	747.824	979.191
ARL5AP2	0.504619	0.0157351	0.0583235	0.269789	0.787322	NA	1	0	0	0	0	0	0	0	0	0	1.20572	4.8497	0
ARL5AP3	0.205998	0	0.0580207	0	1	NA	1	0	0	1.50204	0	0	0	0	0	0	0	0.96994	0
ARL5AP4	0.291524	0	0.0580207	0	1	NA	1	0	1.77733	0.751021	0	0	0	0	0	0	0	0.96994	0
ARL5AP5	0.673435	0.0470841	0.078004	0.603611	0.546102	NA	1	1.37634	0	0	1.02824	0	0	0	1.32531	0	2.41145	1.93988	0
ARL5B	1202.33	-0.113733	0.118171	-0.962442	0.335828	0.567613	0.567613	1396.99	1203.25	1137.8	1362.42	1395.13	1115.94	1208.34	1284.23	1116.88	1165.94	926.293	1114.8
ARL5C	5.9133	0.134543	0.146678	0.917271	0.359001	NA	1	0	3.55465	9.01225	1.02824	3.17074	6.87263	3.31658	0	0	22.9088	14.5491	6.54665
ARL6	83.016	-0.0237673	0.235131	-0.101081	0.919486	0.963215	0.963215	104.602	70.2044	78.1061	94.5981	118.903	63.5718	93.9697	107.35	46.5739	72.3435	54.3166	91.6531
PACSIN3	401.544	-1.02845	0.118632	-8.66928	4.34852e-18	3.00048e-16	3.00048e-16	502.365	554.526	554.253	565.532	571.527	620.255	212.261	262.412	240.035	282.139	172.649	280.571
ARL6IP1P1	0.211278	0	0.0580207	0	1	NA	1	0	0.888663	0.751021	0	0	0	0	0	0.895652	0	0	0
ARL6IP1P2	1.5978	0.141365	0.142641	0.991055	0.321659	NA	1	1.37634	3.55465	1.50204	0	0.792686	1.71816	2.21105	1.32531	0	4.8229	0	1.87047
ARL6IP1P3	2.27773	0.195699	0.176944	1.10599	0.268729	NA	1	4.12902	0.888663	1.50204	2.05648	0.792686	1.71816	3.31658	3.97594	0.895652	2.41145	0.96994	4.67618
ARL6IP4	5.57222	-0.0527841	0.202166	-0.261093	0.794021	NA	1	2.75268	2.66599	5.25714	2.05648	11.8903	7.73171	3.31658	6.62657	0.895652	3.61717	11.6393	8.41712
ARL6IP5	1472.88	-0.10977	0.0835145	-1.31439	0.188717	0.402784	0.402784	1681.89	1669.8	1500.54	1206.13	1208.85	1182.09	1745.63	1058.93	2079.7	1159.91	2075.67	1105.45
HOXA10	1855.97	-0.803793	0.0928018	-8.6614	4.66012e-18	3.20024e-16	3.20024e-16	2566.88	2307.86	2041.27	2329.99	2512.02	2131.37	1569.85	1346.52	1505.59	1239.48	1390.89	1329.9
ARL8A	618.209	0.026064	0.105626	0.246756	0.805097	0.907959	0.907959	622.106	681.605	590.302	534.685	566.771	640.014	600.301	587.114	725.478	569.102	682.838	618.19
HOMER1	1093.51	0.826925	0.0956527	8.64508	5.37674e-18	3.67495e-16	3.67495e-16	752.859	831.789	708.963	809.225	734.027	760.285	1570.95	1508.21	1388.26	1239.48	1391.86	1426.23
ARL9	6.69232	0.125724	0.209413	0.600363	0.548264	NA	1	1.37634	5.33198	10.5143	6.16944	7.92686	3.43631	3.31658	5.30125	5.37391	18.0859	10.6693	2.80571
ARLNC1	3.74357	0.0636271	0.136024	0.467765	0.639953	NA	1	0	0	13.5184	2.05648	0.792686	2.57724	1.10553	0	2.68696	9.64579	10.6693	1.87047
ARMC1	1434.16	0.0335106	0.105778	0.316801	0.751394	0.880313	0.880313	1447.91	1452.08	1165.58	1569.09	1663.06	1436.38	1329.95	1725.56	1249.43	1443.25	1111.55	1616.09
ARMC10	543.527	-0.0575752	0.110676	-0.520214	0.602914	0.785844	0.785844	523.01	524.311	517.453	562.447	610.368	603.073	509.647	629.524	546.348	553.427	418.044	524.667
ARMC10P1	2.73777	-0.060669	0.187678	-0.323261	0.746498	NA	1	1.37634	3.55465	2.25306	2.05648	3.96343	5.15447	3.31658	5.30125	0.895652	1.20572	0.96994	2.80571
BCL11B	193.694	-1.48487	0.17233	-8.61645	6.90593e-18	4.69798e-16	4.69798e-16	323.44	295.925	278.629	290.992	260.001	312.705	113.869	94.0972	71.6522	92.8408	113.483	76.6893
ARMC2	88.5737	-0.0840655	0.206854	-0.406401	0.684448	0.838561	0.838561	66.0644	80.8683	84.8653	101.796	112.561	77.3171	117.186	98.0732	71.6522	91.635	78.5651	82.3007
ARMC2-AS1	12.9189	-0.542806	0.251342	-2.15963	0.0308013	NA	1	12.3871	28.4372	17.2735	23.6495	14.2683	16.3225	5.52763	7.95188	6.26956	4.8229	9.6994	8.41712
ARMC3	1.16193	0.0254933	0.0626572	0.406869	0.684104	NA	1	0	0	8.26123	0	0	0.859079	0	0	0	4.8229	0	0
ARMC5	702.41	0.0377113	0.12143	0.310559	0.756136	0.882341	0.882341	682.665	678.05	582.041	641.622	632.563	620.255	973.968	762.055	894.756	622.154	771.102	567.688
ARMC6	1201.92	0.0418639	0.0912901	0.458581	0.646535	0.81506	0.81506	1161.63	1165.93	1019.13	1325.4	1315.07	1254.25	1087.84	1423.39	1150.02	1257.57	929.202	1333.65
ARMC7	329.656	-0.0472523	0.109329	-0.432201	0.665595	0.825372	0.825372	345.462	368.795	326.694	324.924	342.44	317	346.03	310.123	311.687	342.426	320.08	300.211
ARMC8	773.911	0.0905733	0.0835233	1.08441	0.278184	0.511186	0.511186	857.461	807.795	780.31	753.7	745.918	700.149	840.2	796.513	721	783.721	733.275	766.893
ARMC9	147.306	0.0263001	0.183226	0.143539	0.885865	0.948031	0.948031	119.742	134.188	151.706	134.699	151.403	148.621	140.402	116.628	166.591	195.327	175.559	132.803
ARMCX1	8.49085	0.0580198	0.231393	0.250742	0.802014	NA	1	16.5161	5.33198	5.25714	9.25416	5.5488	11.168	6.63316	11.9278	1.7913	8.44007	10.6693	9.35235
ARMCX2	6.79335	-0.192435	0.161217	-1.19364	0.232618	NA	1	4.12902	11.5526	16.5225	15.4236	7.13417	12.0271	0	0	0	10.8515	3.87976	0
ARMCX3	484.483	-0.188619	0.10225	-1.84468	0.0650844	0.194994	0.194994	528.515	503.872	530.221	513.092	477.197	450.157	508.542	417.474	501.565	374.98	548.986	459.2
ARMCX3-AS1	1.50867	0.0928529	0.123629	0.751062	0.452615	NA	1	0	0.888663	1.50204	1.02824	0.792686	2.57724	0	0	0	8.44007	1.93988	0.935235
MID1	80.4998	1.67711	0.194903	8.60482	7.6437e-18	5.17557e-16	5.17557e-16	34.4085	29.3259	37.551	31.8754	33.2928	32.645	122.713	143.134	103.896	122.984	134.822	139.35
ARMCX5	272.077	0.0425061	0.146915	0.289324	0.772333	0.891295	0.891295	244.989	277.263	254.596	298.19	307.562	246.556	250.954	247.834	287.504	329.163	218.236	302.081
DENND1B	199.448	1.22613	0.142906	8.57999	9.48808e-18	6.39453e-16	6.39453e-16	105.978	101.308	118.661	123.389	111.769	109.962	320.603	310.123	255.261	278.522	272.553	285.247
ARMCX7P	0.263017	0.0301218	0.0580207	0.519156	0.603652	NA	1	0	0	0	0	0	0	0	1.32531	0.895652	0	0	0.935235
SEMA6C	442.846	-0.984431	0.114766	-8.57771	9.67784e-18	6.49222e-16	6.49222e-16	553.289	566.078	500.18	654.989	668.234	643.45	268.643	310.123	220.33	292.991	284.192	351.648
ARMH3	635.492	-0.0430248	0.113521	-0.379004	0.704685	0.851759	0.851759	765.246	697.601	574.531	650.876	627.015	569.569	668.843	613.62	629.643	540.164	654.709	634.089
KANK2	898.246	-1.34783	0.15741	-8.56251	1.10437e-17	7.37434e-16	7.37434e-16	1083.18	1177.48	1101.75	1561.9	1569.52	1586.72	315.075	506.27	292.878	426.826	431.623	725.743
ARMS2	0.722433	0.0317219	0.0666602	0.475874	0.634164	NA	1	0	0	2.25306	0	0	0.859079	0	0	0	3.61717	1.93988	0
ARMT1	574.819	0.00370264	0.121731	0.0304165	0.975735	0.988907	0.988907	622.106	570.522	511.445	595.351	630.978	542.079	635.677	557.957	549.93	626.977	466.541	588.263
ARNILA	19.9449	-0.423261	0.254424	-1.6636	0.0961915	0.256593	0.256593	13.7634	13.3299	16.5225	38.0449	16.6464	38.6585	11.0553	13.2531	17.0174	22.9088	20.3687	17.7695
NAB2	629.515	-1.0004	0.116903	-8.5575	1.15339e-17	7.63133e-16	7.63133e-16	754.235	764.25	661.649	955.235	1000.37	989.658	312.864	441.329	402.148	446.118	301.651	524.667
ARNT2	32.4675	0.260887	0.235875	1.10604	0.26871	0.49995	0.49995	44.0429	56.8744	55.5755	1.02824	3.17074	2.57724	77.3868	1.32531	41.2	28.9374	74.6854	2.80571
ARNT2-DT	3.13996	0.0348148	0.124518	0.279597	0.779787	NA	1	0	3.55465	5.25714	0	0	6.87263	0	1.32531	0.895652	7.23435	10.6693	1.87047
ARPC1A	323.791	-0.154025	0.122166	-1.26079	0.207384	0.427271	0.427271	304.172	343.913	350.727	329.037	324.209	388.304	274.17	307.473	337.661	309.871	303.591	312.369
ARPC1B	480.067	-0.0759944	0.148447	-0.51193	0.6087	0.789621	0.789621	498.236	498.54	587.298	468.878	399.514	564.415	368.14	428.076	527.539	460.587	497.579	462.006
ARPC1BP1	1.05416	0.0627137	0.0601806	1.04209	0.297369	NA	1	0	0	3.00408	0	0	0	0	0	0	9.64579	0	0
ARPC2	8550.57	-0.0316825	0.0420032	-0.754288	0.450676	0.672049	0.672049	8420.46	8877.74	8809.47	8233.12	8628.39	8863.97	8263.81	8468.75	8782.76	8279.71	8558.75	8419.92
ARPC3	2134.55	-0.0143382	0.0774971	-0.185015	0.853217	0.931238	0.931238	2123.7	2227.88	1888.82	2069.85	2081.59	2151.99	2322.71	2052.91	2440.65	2036.47	2069.85	2148.24
ARPC3P1	5.10444	0.0906596	0.21944	0.413141	0.679503	NA	1	8.25805	3.55465	6.00816	4.11296	7.92686	2.57724	5.52763	6.62657	2.68696	3.61717	1.93988	8.41712
ARPC3P2	0.76479	0.0765911	0.0827321	0.925772	0.354564	NA	1	1.37634	0	0	0	0.792686	0	0	0	1.7913	2.41145	0	2.80571
ARPC3P3	6.10418	0.150023	0.234476	0.639821	0.522289	NA	1	8.25805	6.22064	5.25714	6.16944	3.17074	7.73171	5.52763	9.27719	3.58261	4.8229	3.87976	9.35235
ARPC3P4	0.343795	-0.00786165	0.0580207	-0.135497	0.892219	NA	1	1.37634	0	0.751021	1.02824	0	0	0	0	0	0	0.96994	0
ARPC3P5	2.05813	-0.0384568	0.155936	-0.246619	0.805203	NA	1	4.12902	2.66599	0	3.08472	3.17074	1.71816	0	1.32531	2.68696	1.20572	0.96994	3.74094
ARPC4	1665.03	0.00324214	0.0814114	0.0398242	0.968233	0.985816	0.985816	1643.35	1739.11	1463.74	1656.5	1758.18	1552.35	1734.57	1598.33	1833.4	1718.16	1620.77	1661.91
ARPC5	3856.59	0.1692	0.0856988	1.97435	0.0483414	0.157055	0.157055	3648.68	3571.54	3187.33	3525.84	3691.54	3164.85	5075.47	4174.74	4485.43	3703.98	4210.51	3839.14
ARPC5L	1222.74	-0.0964845	0.0856922	-1.12594	0.26019	0.491427	0.491427	1292.38	1284.12	1272.98	1311.01	1332.51	1328.14	998.29	1220.61	1208.23	1216.58	938.902	1269.11
ARPIN	4.42481	0.0504274	0.111594	0.451882	0.651354	NA	1	0	0	6.00816	2.05648	0	7.73171	0	0	1.7913	18.0859	16.489	0.935235
RNF122	253.404	-1.05864	0.123705	-8.55782	1.15023e-17	7.63133e-16	7.63133e-16	323.44	292.37	317.682	370.167	403.477	370.263	143.718	174.941	143.304	155.538	154.22	191.723
ARPP19P1	0.499831	0.04814	0.0738727	0.651661	0.51462	NA	1	0	0.888663	0	0	0.792686	0	0	0	0	2.41145	0.96994	0.935235
ARPP19P2	1.25657	0.0284207	0.110773	0.256567	0.797513	NA	1	4.12902	0	1.50204	1.02824	0	2.57724	0	0	0.895652	1.20572	0	3.74094
GAS5	7643.04	-0.893247	0.104447	-8.55218	1.20788e-17	7.95555e-16	7.95555e-16	8604.89	9489.14	11365.2	8792.48	8840.83	11135.4	5785.22	5272.1	6316.14	4680.62	6334.68	5099.84
ARPP21-AS1	7.41589	0.398278	0.225563	1.76571	0.0774443	NA	1	0	3.55465	3.7551	3.08472	1.58537	5.15447	9.94973	9.27719	19.7043	15.6744	11.6393	5.61141
ARR3	1.26324	0.0354583	0.0866852	0.409047	0.682505	NA	1	0	0.888663	6.75918	0	0	1.71816	0	0	0	4.8229	0.96994	0
ARRB1	16.7723	0.0095192	0.168321	0.0565537	0.954901	0.979368	0.979368	6.88171	24.8826	49.5674	20.5648	11.8903	18.8997	0	1.32531	0.895652	51.8461	13.5792	0.935235
ARRB2	4099.21	-0.205118	0.0997281	-2.05677	0.0397085	0.136225	0.136225	4025.8	4570.39	4865.86	4025.56	4351.85	5035.92	3197.18	3726.78	3619.33	3675.05	3933.11	4163.67
ARRDC1	368.206	0.00581813	0.12437	0.0467807	0.962688	0.98311	0.98311	404.644	351.911	361.992	295.105	345.611	397.753	423.416	363.136	419.165	340.014	373.427	342.296
ARRDC1-AS1	263.755	0.0558068	0.123408	0.452215	0.651114	0.817093	0.817093	268.387	252.38	256.098	236.495	237.013	255.146	270.854	284.942	309.896	236.322	317.17	240.355
ARRDC2	447.945	0.00936905	0.105948	0.0884308	0.929534	0.965932	0.965932	433.548	430.113	408.555	468.878	442.319	429.539	504.12	490.366	489.922	414.769	418.044	445.172
ARRDC3	1078.42	-0.240865	0.116723	-2.06355	0.0390601	0.134597	0.134597	1092.82	1141.93	1029.65	1015.9	1203.3	1054.09	1247.03	829.646	1385.57	1027.28	1027.17	886.603
ARRDC3-AS1	28.1388	0.167927	0.245906	0.682892	0.494675	0.706717	0.706717	27.5268	39.1012	35.298	21.593	19.0245	15.4634	38.6934	22.5303	29.5565	26.5259	43.6473	18.7047
ARRDC4	66.119	0.0659465	0.198276	0.332599	0.739437	0.872014	0.872014	66.0644	66.6497	64.5878	51.412	72.1344	64.4309	75.1758	64.9403	71.6522	73.5492	61.1062	61.7255
ARRDC5	9.03229	-0.138862	0.227199	-0.61119	0.541074	NA	1	4.12902	12.4413	13.5184	5.1412	11.0976	12.0271	9.94973	1.32531	6.26956	13.263	14.5491	4.67618
ARSA	275.955	0.0189916	0.11422	0.166273	0.867942	0.938544	0.938544	271.139	274.597	289.894	253.975	251.281	253.428	307.336	239.882	307.209	248.379	336.569	277.765
LRIG1	231.105	-1.38296	0.162308	-8.52056	1.58782e-17	1.04106e-15	1.04106e-15	298.666	335.026	315.429	408.211	413.782	355.659	93.9697	164.339	61.8	110.927	88.2645	127.192
DYNC2H1	624.704	-1.08102	0.126913	-8.51779	1.62631e-17	1.0615e-15	1.0615e-15	790.02	659.388	693.192	1043.66	967.87	786.057	444.421	467.836	399.461	367.746	457.812	418.985
ARSD-AS1	0.993737	0.0701895	0.102844	0.682486	0.494932	NA	1	1.37634	1.77733	3.7551	0	0	0	0	0	0	1.20572	1.93988	1.87047
ARSDP1	0.241153	-0.00786165	0.0580207	-0.135497	0.892219	NA	1	0	0	0	1.02824	0	0	0	0	0.895652	0	0.96994	0
ARSF	1.53608	0.104812	0.103759	1.01015	0.312424	NA	1	0	1.77733	3.7551	0	1.58537	0	0	0	0	8.44007	1.93988	0.935235
ARSG	44.2942	0.0616455	0.240713	0.256096	0.797877	0.904564	0.904564	26.1505	46.2105	45.8123	41.1296	38.0489	45.5312	61.9095	42.41	49.2609	61.4919	43.6473	29.9275
ARSH	1.7495	0.11287	0.0928619	1.21546	0.22419	NA	1	0	0	4.50612	0	0	0	0	0	1.7913	10.8515	2.90982	0.935235
ARSI	3.14208	0.122728	0.110143	1.11426	0.265168	NA	1	0	0	9.01225	1.02824	0	1.71816	1.10553	0	0	18.0859	5.81964	0.935235
ARSJ	1.95112	0.113211	0.0918503	1.23256	0.217738	NA	1	0	0.888663	5.25714	0	0	0.859079	0	0	0	14.4687	1.93988	0
ARSK	122.09	0.173618	0.173185	1.0025	0.316104	0.550321	0.550321	116.989	122.636	122.416	100.768	100.671	117.694	137.085	153.736	148.678	109.721	129.002	105.682
ARSL	118.815	0.173555	0.212509	0.816694	0.414104	0.642121	0.642121	78.4515	111.972	100.637	122.361	119.696	101.371	170.251	168.315	126.287	131.424	92.1443	102.876
ART1	1.8151	0.0367415	0.0757199	0.485229	0.627514	NA	1	0	0	6.75918	0	0	3.43631	0	0	0	9.64579	1.93988	0
ART2P	0.400179	0.0299747	0.0580387	0.516461	0.605533	NA	1	0	0.888663	1.50204	0	0	0	0	0	0	2.41145	0	0
ART3	0.993383	0.0504307	0.0727507	0.693199	0.488185	NA	1	0	0	6.00816	0	0	0	0	1.32531	0	3.61717	0.96994	0
ART4	0.611312	-0.00604543	0.0642527	-0.0940883	0.925039	NA	1	0	0	1.50204	0	0	1.71816	0	0	0	1.20572	2.90982	0
ART5	2.77446	0.071612	0.0907144	0.789423	0.429865	NA	1	0	0	9.76327	0	0	2.57724	0	0	0	13.263	5.81964	1.87047
ARTN	10.2424	0.0958048	0.226938	0.422162	0.672907	NA	1	5.50537	6.22064	9.76327	7.19768	2.37806	21.477	6.63316	14.5784	11.6435	19.2916	12.6092	5.61141
ARV1	286.244	0.111204	0.113635	0.978609	0.327773	0.560604	0.560604	272.516	291.481	304.163	265.286	282.196	275.764	254.271	298.195	291.983	307.46	302.621	288.988
ARVCF	122.205	-0.15404	0.201168	-0.765728	0.443838	0.665483	0.665483	128	128.856	159.967	120.304	139.513	128.003	84.02	100.724	103	149.51	133.852	90.7178
ARX	91.7492	0.420784	0.242047	1.73843	0.0821343	0.229903	0.229903	148.645	145.741	144.947	10.2824	19.0245	30.9268	142.613	25.181	195.252	53.0519	161.01	24.3161
AS3MT	1.96448	0.0570033	0.156324	0.364649	0.715373	NA	1	1.37634	2.66599	1.50204	2.05648	0	2.57724	1.10553	0	2.68696	4.8229	2.90982	1.87047
HDAC9	550.362	-1.15451	0.135556	-8.51688	1.63911e-17	1.06505e-15	1.06505e-15	835.439	830.9	745.012	759.87	717.381	612.523	351.557	237.231	462.156	321.928	416.104	314.239
PPDPF	2120.61	-0.775718	0.0911268	-8.51251	1.70202e-17	1.10099e-15	1.10099e-15	2346.66	2833.06	2555.72	2324.85	2625.38	2876.19	1827.43	1407.48	1736.67	1479.42	1836.1	1598.32
ASAH2	42.2321	-0.0933765	0.241244	-0.387062	0.698711	0.848194	0.848194	42.6666	33.7692	47.3143	41.1296	40.427	48.9675	40.9045	46.386	50.1565	51.8461	41.7074	21.5104
ASAH2B	100.023	0.388741	0.188804	2.05897	0.039497	0.135715	0.135715	99.0966	64.8724	75.8531	89.4569	89.5735	91.9214	99.4973	120.603	128.974	127.807	87.2946	125.322
ASAP1	1206.45	-0.156996	0.0890649	-1.76272	0.0779481	0.22203	0.22203	1229.07	1230.8	1291.76	1309.98	1250.07	1436.38	1051.36	1312.06	992.382	1057.42	1112.52	1203.65
ASAP1-IT2	4.12824	-0.0526236	0.188649	-0.27895	0.780283	NA	1	4.12902	2.66599	8.26123	2.05648	3.96343	6.87263	0	5.30125	3.58261	1.20572	7.75952	3.74094
JUP	4243.68	-0.476597	0.056058	-8.50187	1.86564e-17	1.20147e-15	1.20147e-15	4496.51	4619.27	4076.54	4873.86	5192.89	4736.96	4078.29	3531.96	4143.29	3556.89	4108.67	3509
LINC02363	261.205	1.6097	0.189956	8.47405	2.36999e-17	1.51952e-15	1.51952e-15	97.7203	87.089	73.6	140.869	127.622	120.271	452.16	588.439	316.165	426.826	246.365	457.33
SMARCB1	3986.06	-0.51047	0.0602882	-8.46716	2.51439e-17	1.605e-15	1.605e-15	4463.48	4558.84	4229	4913.96	5012.95	4907.06	3194.97	3728.11	3245.84	3324.18	2937.95	3316.34
ASB10	4.96524	0.145388	0.133713	1.08731	0.276898	NA	1	0	3.55465	12.7673	2.05648	0.792686	4.29539	0	0	0.895652	26.5259	7.75952	0.935235
ASB11	0.871319	0.0211427	0.0843754	0.250579	0.80214	NA	1	1.37634	0	6.00816	0	0	0	0	0	0.895652	1.20572	0.96994	0
ASB12	1.34626	0.108527	0.0885954	1.22498	0.220583	NA	1	0	0.888663	3.7551	0	0	0	0	0	0.895652	9.64579	0.96994	0
ASB13	259.569	-0.30303	0.145904	-2.07692	0.0378088	0.131177	0.131177	257.376	279.04	236.571	331.093	301.221	268.892	248.743	245.183	276.756	253.202	198.838	217.91
ASB14	2.08808	0.0441497	0.136766	0.322811	0.746838	NA	1	1.37634	0.888663	3.00408	0	3.17074	3.43631	0	0	0.895652	8.44007	2.90982	0.935235
ASB15-AS1	0.555224	0.0183099	0.0633947	0.288824	0.772716	NA	1	0	0	2.25306	1.02824	0	0	0	0	0	2.41145	0.96994	0
ASB16	6.33423	0.00679264	0.183436	0.0370301	0.970461	NA	1	0	4.44332	17.2735	3.08472	6.34149	5.15447	1.10553	2.65063	8.95652	9.64579	14.5491	2.80571
ASB16-AS1	356.132	0.0659947	0.125626	0.525328	0.599355	0.783649	0.783649	319.311	314.587	355.233	289.964	351.16	381.431	371.457	322.051	416.478	381.009	399.615	371.288
ASB17	0.243657	-0.00786165	0.0580207	-0.135497	0.892219	NA	1	0	0	0	0	0	1.71816	0	0	0	1.20572	0	0
ASB18	3.64419	0.159979	0.128666	1.24337	0.213733	NA	1	0	1.77733	9.01225	2.05648	0	2.57724	0	1.32531	0	19.2916	5.81964	1.87047
ASB2	12.1076	0.266838	0.198713	1.34283	0.179328	NA	1	12.3871	3.55465	22.5306	2.05648	10.3049	11.168	4.4221	7.95188	1.7913	47.0232	16.489	5.61141
ASB3	356.517	0.295468	0.136841	2.1592	0.0308349	0.112205	0.112205	319.311	313.698	359.739	335.206	328.965	297.241	435.577	454.582	330.496	342.426	356.938	404.022
ASB4	2.04232	0.00276869	0.100256	0.0276163	0.977968	NA	1	0	0	13.5184	0	0.792686	2.57724	2.21105	0	1.7913	3.61717	0	0
ASB5	0.808993	0.0293973	0.0677213	0.434092	0.664222	NA	1	0	0.888663	0	2.05648	0	0	0	0	0	4.8229	1.93988	0
ASB6	587.229	-0.0410453	0.0943693	-0.434943	0.663603	0.824508	0.824508	597.332	594.516	523.461	627.227	569.149	617.677	587.034	599.042	624.269	555.839	547.046	604.162
ASB7	460.525	0.135785	0.110815	1.22533	0.220451	0.444702	0.444702	422.537	407.896	368.751	490.471	472.441	382.29	506.331	496.992	513.209	477.467	479.15	508.768
ASB8	513.389	0.0980804	0.09276	1.05736	0.290349	0.523782	0.523782	527.139	501.206	479.902	453.454	491.465	477.648	551.657	483.739	611.73	511.227	541.226	530.278
ASB9	1.66966	0.0852143	0.0776841	1.09693	0.272671	NA	1	0	0	3.00408	0	0	0.859079	0	0	0	13.263	2.90982	0
ASB9P1	0.239593	0.0174606	0.0580207	0.300938	0.763461	NA	1	0	0	0	0	0	0	0	0	0	0	1.93988	0.935235
ASCC1	1057.7	0.124031	0.0741666	1.67233	0.09446	0.25328	0.25328	1264.86	1243.24	1142.3	731.079	767.32	721.626	1485.83	825.67	1511.86	774.075	1400.59	823.942
ASCC2	1604.95	0.111722	0.0759398	1.47119	0.141238	0.331783	0.331783	1673.63	1637.81	1479.51	1498.15	1635.31	1510.26	1585.32	1794.47	1670.39	1556.59	1538.32	1679.68
ASCC3	1845.3	0.12398	0.0908712	1.36435	0.172458	0.379915	0.379915	1896.6	1690.24	1641.73	1941.32	1858.85	1604.76	1988.84	2033.03	1893.41	1823.05	1723.58	2048.17
ASCL1	1.99692	0.0207901	0.0858112	0.242277	0.808565	NA	1	0	0	6.75918	0	0	5.15447	0	0	0	7.23435	3.87976	0.935235
ASCL2	2.36736	0.0620595	0.104694	0.592772	0.553334	NA	1	0	0	4.50612	0	0	5.15447	0	0	2.68696	8.44007	3.87976	3.74094
ASCL3	0.448317	0.0304258	0.0580592	0.524047	0.600246	NA	1	0	0	0	0	0.792686	0	0	0	0	3.61717	0.96994	0
ASCL4	1.51187	0.139703	0.11233	1.24368	0.213617	NA	1	0	0.888663	3.00408	0	0	0.859079	1.10553	0	0	8.44007	2.90982	0.935235
ASCL5	2.88978	0.0671313	0.131822	0.509257	0.610572	NA	1	0	3.55465	3.7551	0	1.58537	4.29539	2.21105	0	0	9.64579	7.75952	1.87047
ASF1A	843.295	0.117876	0.113828	1.03556	0.300409	0.533083	0.533083	788.644	774.026	657.894	884.287	884.638	815.266	805.928	951.575	968.2	999.545	721.635	867.898
ASF1B	1877.88	-0.0162774	0.0778258	-0.209151	0.83433	0.92307	0.92307	1899.35	1818.2	1785.18	2032.83	2000.74	1938.94	1796.48	1962.79	1655.16	1748.3	1710.97	2185.64
ASGR1	19.3076	-0.0582542	0.24291	-0.239818	0.810471	0.911429	0.911429	15.1398	16.8846	38.302	22.6213	18.2318	18.8997	7.73868	7.95188	12.5391	34.966	28.1283	10.2876
ASGR2	36.8364	0.039336	0.23903	0.164565	0.869286	0.938992	0.938992	24.7741	31.9919	45.0612	33.9319	38.8416	44.6721	25.4271	46.386	33.1391	43.4061	40.7375	33.6685
ASH1L	1503.38	0.111403	0.0811656	1.37254	0.169895	0.376878	0.376878	1604.81	1375.65	1502.04	1398.41	1394.33	1305.8	1703.62	1517.48	1527.09	1404.67	1793.42	1513.21
ASH1L-AS1	37.4358	-0.0848157	0.245766	-0.345108	0.730013	0.867325	0.867325	44.0429	31.1032	42.8082	38.0449	38.8416	37.7995	36.4824	53.0125	30.4522	19.2916	44.6172	32.7332
ASH1L-IT1	2.50643	-0.0904347	0.174229	-0.519057	0.603721	NA	1	1.37634	2.66599	4.50612	3.08472	4.75612	0.859079	2.21105	0	1.7913	1.20572	3.87976	3.74094
ASH2L	2280.57	-0.036527	0.0763399	-0.478478	0.63231	0.806425	0.806425	2269.59	2347.85	2067.56	2495.54	2439.89	2231.89	2338.19	2377.61	2158.52	2184.77	2036.87	2418.52
ASH2LP1	0.199225	0	0.0580207	0	1	NA	1	0	0.888663	1.50204	0	0	0	0	0	0	0	0	0
ASH2LP2	0.288232	0.0174606	0.0580207	0.300938	0.763461	NA	1	0	0	2.25306	0	0	0	0	0	0	1.20572	0	0
ASH2LP3	1.76665	0.00690784	0.150914	0.0457733	0.963491	NA	1	2.75268	2.66599	4.50612	0	2.37806	1.71816	1.10553	0	1.7913	2.41145	0	1.87047
HOXA-AS3	265.819	-1.38424	0.163808	-8.45038	2.90364e-17	1.84534e-15	1.84534e-15	397.763	356.354	421.323	334.178	370.184	408.062	135.98	106.025	176.443	136.247	217.267	129.998
ASIC2	31.3271	-0.529541	0.245423	-2.15766	0.030954	0.11252	0.11252	37.1612	33.7692	57.8286	51.412	38.8416	58.4173	5.52763	10.6025	5.37391	33.7603	32.008	11.2228
ID2	567.164	1.24374	0.147583	8.42742	3.53356e-17	2.23586e-15	2.23586e-15	311.053	354.577	223.053	289.964	287.745	233.669	1103.31	738.199	932.374	643.857	968.97	719.196
ASIC4	10.6105	0.18823	0.206209	0.912814	0.36134	NA	1	6.88171	11.5526	31.5429	6.16944	2.37806	10.3089	5.52763	2.65063	1.7913	26.5259	13.5792	8.41712
ASIC4-AS1	0.388709	0.0300375	0.058031	0.51761	0.60473	NA	1	0	0	2.25306	0	0	0	0	0	0	2.41145	0	0
ASIC5	0.393913	0.0427829	0.0580207	0.737374	0.460895	NA	1	0	0	0.751021	0	0	0	0	3.97594	0	0	0	0
ASIP	1.9483	0.0438765	0.0903554	0.485599	0.627252	NA	1	0	2.66599	2.25306	0	0.792686	0	0	0	0	6.02862	11.6393	0
ASL	249.902	0.00340149	0.131305	0.0259053	0.979333	0.990337	0.990337	284.903	233.718	261.355	187.14	204.513	231.951	304.02	205.424	338.556	214.619	326.87	205.752
ASLP1	2.68854	0.154768	0.172571	0.896839	0.369805	NA	1	5.50537	3.55465	0.751021	0	2.37806	0.859079	4.4221	2.65063	4.47826	4.8229	0.96994	1.87047
ASNS	47.2797	0.409233	0.209819	1.95041	0.0511272	0.163648	0.163648	39.9139	39.1012	34.5469	46.2708	42.0124	38.6585	45.3266	66.2657	52.8435	57.8748	46.5571	57.9846
ASNSD1	372.539	-0.117627	0.115577	-1.01774	0.308803	0.542503	0.542503	408.773	375.904	392.033	370.167	418.538	370.263	336.08	389.642	385.13	365.334	345.299	313.304
ASNSP3	0.551321	0.0348583	0.086707	0.402024	0.687666	NA	1	0	0.888663	1.50204	0	0	0.859079	1.10553	1.32531	0	0	0	0.935235
ASNSP4	0.293081	0.0301218	0.0580207	0.519156	0.603652	NA	1	0	0	0	0	0	0	1.10553	0	0	2.41145	0	0
ASNSP6	0.263539	0.0301218	0.0580207	0.519156	0.603652	NA	1	0	0	0.751021	0	0	0	0	0	0	2.41145	0	0
ASPA	2.10746	0.031764	0.0886098	0.35847	0.719991	NA	1	0	0	12.7673	0	0	1.71816	0	0	0.895652	6.02862	3.87976	0
ASPDH	4.67636	0.167903	0.124235	1.35149	0.176538	NA	1	0	1.77733	8.26123	1.02824	0	5.15447	0	0	1.7913	31.3488	5.81964	0.935235
ASPG	11.9024	0.179397	0.154246	1.16306	0.244807	NA	1	8.25805	14.2186	45.8123	0	0.792686	6.01355	1.10553	0	2.68696	44.6118	17.4589	1.87047
ASPH	1483.85	-0.0524569	0.0973963	-0.538592	0.590168	0.777591	0.777591	1434.15	1380.98	1353.34	1730.53	1640.07	1522.29	1474.77	1777.24	1361.39	1416.73	1194.97	1519.76
ASPHD1	38.2403	-0.142993	0.239197	-0.597804	0.549971	0.748481	0.748481	41.2902	36.4352	48.8163	44.2143	39.6343	42.9539	42.01	29.1569	29.5565	50.6404	24.2485	29.9275
ASPHD2	101.206	0.348082	0.180907	1.92409	0.0543435	0.171555	0.171555	74.3224	91.5323	102.89	90.4851	85.6101	98.794	108.342	106.025	94.0435	114.544	105.723	142.156
ASPM	4680.87	0.100247	0.118308	0.847339	0.396806	0.627699	0.627699	4793.8	4323.35	4576.72	4776.18	4398.61	4217.22	5534.26	5523.91	3911.31	4105.49	5222.16	4787.47
ASPN	0.152418	-0.00786165	0.0580207	-0.135497	0.892219	NA	1	0	0	0	0	0	0.859079	0	0	0	0	0.96994	0
ASPSCR1	664.726	-0.0726795	0.0807687	-0.899847	0.368202	0.599636	0.599636	638.623	660.277	692.441	713.599	706.283	740.526	566.029	703.741	624.269	706.554	579.054	645.312
ASRGL1	4.57431	0.167567	0.123088	1.36136	0.173401	NA	1	0	1.77733	11.2653	0	0	2.57724	0	0	2.68696	24.1145	8.72946	3.74094
ASS1	7.1527	0.191337	0.137731	1.38921	0.164769	NA	1	0	4.44332	13.5184	3.08472	0	7.73171	0	5.30125	0	37.3775	9.6994	4.67618
ASS1P1	3.55978	0.0374501	0.156232	0.239708	0.810557	NA	1	4.12902	0.888663	8.26123	4.11296	3.17074	0.859079	0	1.32531	0.895652	8.44007	9.6994	0.935235
ASS1P10	0.76173	0.0446498	0.0593719	0.752037	0.452029	NA	1	0	0	2.25306	0	0	0.859079	0	0	0	6.02862	0	0
ASS1P11	0.482736	0.0551224	0.0580595	0.949411	0.342411	NA	1	0	0	0	0	0	0	0	0	0	4.8229	0.96994	0
ASS1P12	1.36278	0.079759	0.0777526	1.0258	0.304984	NA	1	0	0	6.00816	0	0	0	0	0	0	8.44007	0.96994	0.935235
ASS1P13	0.440547	0.0424612	0.0580595	0.73134	0.464572	NA	1	0	0	0	0	0	0	0	0	0	2.41145	1.93988	0.935235
ASS1P14	0.646302	0.0353749	0.0666892	0.530443	0.595805	NA	1	0	1.77733	1.50204	0	0	0.859079	0	0	0	3.61717	0	0
ASS1P2	1.78793	-0.0863036	0.126986	-0.679633	0.496737	NA	1	4.12902	0	0.751021	2.05648	0.792686	6.87263	0	2.65063	1.7913	2.41145	0	0
ASS1P3	1.29531	0.0865191	0.0906615	0.954309	0.339927	NA	1	0	2.66599	3.00408	0	0	0	0	0	0	6.02862	2.90982	0.935235
ASS1P4	0.489186	0.0415812	0.0581957	0.714506	0.474914	NA	1	0	0	2.25306	0	0	0	0	0	0	3.61717	0	0
ASS1P5	0.714833	0.0445739	0.0591798	0.753195	0.451333	NA	1	0	0	3.7551	0	0	0	0	0	0	4.8229	0	0
ASS1P7	0.487781	0.0286683	0.0582574	0.492098	0.62265	NA	1	0	0	1.50204	0	0	0	0	0	0	2.41145	1.93988	0
ASS1P9	0.516603	0.0551183	0.05806	0.949334	0.342451	NA	1	1.37634	0	0	0	0	0	0	0	0	4.8229	0	0
ASTE1	179.519	0.0377922	0.142487	0.265233	0.79083	0.900963	0.900963	162.408	156.405	184	176.857	173.598	182.984	203.417	164.339	198.835	196.533	167.8	187.047
ASTL	9.43255	0.207999	0.222858	0.933325	0.350652	NA	1	2.75268	6.22064	12.7673	3.08472	3.96343	10.3089	5.52763	5.30125	16.1217	19.2916	20.3687	7.48188
DCHS2	142.222	-1.50321	0.178736	-8.41024	4.09175e-17	2.5778e-15	2.5778e-15	235.354	209.724	218.547	162.462	145.062	134.016	140.402	34.4581	177.339	51.8461	160.04	37.4094
ASTN2	23.2707	0.144952	0.2539	0.570903	0.568066	0.761029	0.761029	19.2688	23.1052	30.0408	23.6495	18.2318	24.9133	19.8995	18.5544	15.2261	43.4061	24.2485	18.7047
ASTN2-AS1	0.513879	0.0283722	0.0583517	0.486228	0.626806	NA	1	0	0	3.7551	0	0	0	0	0	0	2.41145	0	0
NOL4L	1523.87	-0.654076	0.0777933	-8.40787	4.17531e-17	2.61906e-15	2.61906e-15	1804.38	1673.35	1740.87	2021.52	1856.47	2073.82	1041.41	1288.2	1088.22	1211.75	1245.4	1241.06
ASXL2	2774.97	0.0606562	0.0849595	0.713942	0.475263	0.692797	0.692797	2887.56	2771.74	2929.73	2846.17	2619.83	2546.31	2757.18	3029.67	2520.36	2506.7	3055.31	2829.09
ASXL3	6.36716	0.204364	0.174802	1.16912	0.242357	NA	1	1.37634	7.1093	16.5225	2.05648	0.792686	5.15447	0	5.30125	2.68696	18.0859	13.5792	3.74094
ASXL3-DT	1.18437	0.01461	0.101544	0.143878	0.885597	NA	1	0	3.55465	3.00408	0	1.58537	0	0	0	2.68696	2.41145	0.96994	0
ASZ1	1.12939	0.0679487	0.0841139	0.807818	0.419195	NA	1	0	0.888663	0.751021	0	0	2.57724	0	0	0.895652	8.44007	0	0
ATAD1	1091.42	0.205268	0.093055	2.20588	0.0273926	0.102882	0.102882	1054.28	998.857	921.502	1116.67	1004.33	976.772	1218.29	1300.13	1183.16	1140.62	1032.99	1149.4
ATAD2	6771.6	0.0501022	0.0751222	0.666943	0.504809	0.714464	0.714464	6880.33	6659.64	6337.86	7398.19	7399.72	6516.97	6448.53	7888.26	5575.43	6766.52	5956.4	7431.38
ATAD2B	991.827	-0.144649	0.106622	-1.35665	0.174891	0.383616	0.383616	1076.3	973.086	1043.92	1029.27	936.955	920.932	1176.28	934.346	986.113	733.08	1162.96	928.689
ATAD3A	1465.13	-0.130962	0.0916833	-1.42842	0.153171	0.35068	0.35068	1478.19	1538.28	1369.11	1693.51	1827.14	1639.98	1065.73	1599.65	1267.35	1468.57	1003.89	1630.11
ATAD3B	515.013	-0.235729	0.118511	-1.9891	0.0466904	0.153072	0.153072	604.214	604.291	505.437	575.815	628.6	585.032	392.462	522.173	444.243	464.204	334.629	519.056
ATAD3C	12.0765	-0.100198	0.200793	-0.499015	0.617769	NA	1	4.12902	17.7733	23.2816	6.16944	11.8903	24.0542	5.52763	0	4.47826	21.703	18.4289	7.48188
ATAD5	1554.25	0.0357061	0.0898444	0.397421	0.691057	0.843022	0.843022	1644.73	1440.52	1463.74	1730.53	1644.03	1565.24	1492.46	1811.7	1347.96	1519.21	1255.1	1735.8
ATAT1	369.919	-0.217912	0.13248	-1.64487	0.0999964	0.263445	0.263445	334.451	301.257	365.747	386.618	401.099	489.675	329.447	368.437	410.209	342.426	334.629	375.029
ATCAY	8.55776	0.151851	0.141014	1.07685	0.281547	NA	1	1.37634	3.55465	26.2857	2.05648	0.792686	6.01355	0	0	1.7913	38.5832	20.3687	1.87047
ATE1	819.185	-0.0558151	0.0865791	-0.644672	0.51914	0.72571	0.72571	812.042	854.894	784.816	878.117	833.113	764.58	829.144	844.224	896.548	745.138	798.261	789.339
ATE1OSP	3.40557	0.0896627	0.157442	0.569496	0.56902	NA	1	5.50537	1.77733	4.50612	3.08472	1.58537	1.71816	6.63316	1.32531	0	10.8515	3.87976	0
ATF1	621.203	0.122248	0.105462	1.15917	0.246386	0.476527	0.476527	644.128	592.738	563.265	615.916	649.21	538.642	641.205	695.789	671.739	661.943	563.535	616.32
ATF1P1	0.181305	0.0174606	0.0580207	0.300938	0.763461	NA	1	0	0	0	0	0	0	0	0	0	1.20572	0.96994	0
ATF2	1272.66	-0.0194355	0.0753429	-0.257961	0.796437	0.903568	0.903568	1315.78	1244.13	1172.34	1293.53	1276.22	1164.91	1436.08	1301.46	1322.88	1162.32	1361.8	1220.48
ATF3	187.856	-0.197066	0.15528	-1.2691	0.204406	0.42318	0.42318	177.548	225.72	182.498	202.563	225.916	202.743	171.357	196.146	176.443	149.51	147.431	196.399
CCDC91	536.56	-0.903485	0.107576	-8.39855	4.52037e-17	2.81344e-15	2.81344e-15	732.214	743.811	665.404	708.458	711.039	678.672	364.824	326.027	418.269	370.157	331.719	388.123
ATF4P2	0.400579	0.029788	0.0580609	0.513047	0.607919	NA	1	0	2.66599	0	0	0	0	0	0	0	1.20572	0	0.935235
ATF4P3	42.2017	0.0389176	0.229364	0.169676	0.865265	0.937408	0.937408	44.0429	46.2105	42.8082	39.0731	49.9392	42.9539	25.4271	49.0366	47.4696	39.7889	31.0381	48.6322
ATF4P4	7.0136	-0.0416715	0.229004	-0.181969	0.855607	NA	1	8.25805	6.22064	3.00408	11.3106	11.0976	5.15447	3.31658	5.30125	6.26956	15.6744	3.87976	4.67618
ITPRIPL2	374.883	1.18069	0.140584	8.39845	4.52403e-17	2.81344e-15	2.81344e-15	249.118	238.162	198.269	257.06	222.745	229.374	500.803	661.331	477.383	494.347	396.705	573.299
ATF6	1348.1	0.13695	0.0865669	1.58201	0.113647	0.286057	0.286057	1395.61	1261.01	1127.28	1366.53	1303.97	1164.05	1475.88	1404.83	1471.56	1399.85	1385.07	1421.56
ATF6B	1615.55	0.0909942	0.0625478	1.45479	0.145726	0.338429	0.338429	1537.37	1552.49	1502.79	1522.82	1482.32	1499.95	1778.79	1571.82	1952.52	1540.92	1761.41	1683.42
ATF6-DT	25.7539	0.143396	0.251545	0.570064	0.568635	0.761502	0.761502	12.3871	22.2166	30.0408	22.6213	18.2318	30.9268	24.3216	34.4581	30.4522	28.9374	32.008	22.4456
ITGB1	3723.21	-0.454044	0.0540871	-8.39468	4.67154e-17	2.89276e-15	2.89276e-15	3965.24	4050.53	3861	4501.64	4376.42	4231.82	3302.21	3148.94	3367.65	2997.43	3496.63	3379
CDH2	1007.34	-0.72329	0.0862288	-8.38802	4.94378e-17	3.04832e-15	3.04832e-15	1324.04	1368.54	1276.73	1194.82	1186.65	1146.87	851.255	707.717	904.609	730.669	728.425	667.758
ATF7IP2	2.69615	0.0960077	0.116488	0.824185	0.409834	NA	1	0	0	7.51021	2.05648	0	0.859079	0	0	2.68696	9.64579	6.78958	2.80571
ATG10	221.316	0.114602	0.153463	0.746772	0.455201	0.676228	0.676228	194.064	184.842	225.306	191.253	194.208	243.119	205.628	227.954	260.635	212.207	270.613	245.967
ATG101	566.848	-0.180393	0.114664	-1.57323	0.115665	0.289563	0.289563	593.203	669.163	561.012	569.645	590.551	634	532.863	479.763	580.382	485.907	503.399	602.291
ATG10-IT1	1.32594	0.0861031	0.121642	0.707838	0.479046	NA	1	1.37634	0	6.75918	1.02824	0	0	1.10553	1.32531	0	2.41145	0.96994	0.935235
ATG12	1401.19	0.119375	0.0784977	1.52075	0.128322	0.311978	0.311978	1428.64	1416.53	1335.31	1186.59	1213.6	1143.43	1913.67	1358.45	1726.82	1245.51	1589.73	1256.02
ATG12P1	5.03749	0.04762	0.217235	0.21921	0.826486	NA	1	4.12902	6.22064	3.7551	5.1412	3.96343	2.57724	11.0553	1.32531	3.58261	7.23435	6.78958	4.67618
ATG13	1357.98	-0.0434653	0.0806476	-0.538953	0.589919	0.777438	0.777438	1379.09	1475.18	1276.73	1448.79	1456.16	1272.3	1378.59	1378.33	1328.25	1344.38	1229.88	1328.03
ATG14	233.416	0.0338834	0.136377	0.248454	0.803783	0.907639	0.907639	254.623	210.613	249.339	226.213	198.964	252.569	228.844	249.159	232.87	223.059	251.214	223.521
ATG16L1	469.971	0.0806511	0.115904	0.695842	0.486528	0.701046	0.701046	477.591	473.657	411.559	384.562	443.904	439.848	622.411	421.45	527.539	437.678	514.068	485.387
ATG16L2	644.219	0.291192	0.145109	2.00671	0.0447805	0.148755	0.148755	626.235	565.19	548.996	578.899	531.1	574.724	842.411	800.489	643.974	520.873	717.756	779.986
ATG2A	892.55	-0.121947	0.0887601	-1.37389	0.169474	0.376341	0.376341	1094.19	901.993	933.519	923.36	902.869	835.024	927.536	803.14	915.356	807.835	839.968	825.813
ATG2B	945.406	0.00100875	0.130968	0.00770224	0.993855	0.997321	0.997321	1052.9	892.218	898.972	990.195	925.857	795.507	1118.79	1008.56	887.591	735.492	1070.81	967.968
ATG3	1722.4	0.0210945	0.0620367	0.340032	0.733832	0.869159	0.869159	1578.66	1608.48	1631.97	1807.65	1688.42	1875.37	1597.48	1887.25	1752.79	1795.32	1674.12	1771.34
ATG3P1	0.14318	-0.0205228	0.0580207	-0.353715	0.723552	NA	1	0	0	0	0	0	1.71816	0	0	0	0	0	0
KDM7A	464.236	-0.926428	0.110507	-8.38339	5.14237e-17	3.15733e-15	3.15733e-15	594.58	606.068	600.065	637.509	661.893	558.401	317.286	335.304	312.583	270.082	338.509	338.555
GPC1	160.824	-1.29089	0.154216	-8.37068	5.72884e-17	3.50257e-15	3.50257e-15	217.462	239.05	235.069	226.213	250.489	232.81	88.4421	75.5429	84.1913	106.104	94.0842	80.4302
ATG4C	423.619	0.188808	0.111996	1.68584	0.0918273	0.248335	0.248335	375.741	391.012	352.229	402.042	422.502	385.726	517.386	496.992	412	459.381	432.593	435.82
SGK1	860.342	-0.941626	0.11258	-8.36403	6.06097e-17	3.69006e-15	3.69006e-15	1191.91	1123.27	989.845	820.536	902.077	790.352	1220.5	467.836	1033.58	395.478	990.309	398.41
PLXNC1	1061.05	1.0385	0.124367	8.3503	6.80889e-17	4.12807e-15	4.12807e-15	620.73	544.75	570.025	735.192	682.503	615.1	1761.1	1728.21	1439.31	1281.68	1378.28	1375.73
ATG7	271.602	-0.00187758	0.116694	-0.0160898	0.987163	0.993939	0.993939	286.279	239.05	259.853	269.399	268.721	262.878	280.804	263.737	276.756	265.259	316.2	270.283
ATG9A	763.107	-0.0706339	0.103966	-0.679395	0.496887	0.708589	0.708589	1026.75	887.774	803.592	711.542	753.052	646.027	749.547	687.838	743.391	645.062	830.269	672.434
ATG9B	11.2859	0.249526	0.158471	1.57458	0.115353	NA	1	0	6.22064	17.2735	5.1412	5.5488	8.59079	2.21105	0	2.68696	72.3435	12.6092	2.80571
ATIC	3152.25	-0.0503832	0.105681	-0.476748	0.633542	0.806964	0.806964	2989.41	3080.99	2681.14	3667.73	3747.82	3255.91	2938.49	3575.69	2994.16	3265.1	2182.36	3448.21
ATL1	68.9772	0.12358	0.245288	0.503817	0.61439	0.794182	0.794182	60.559	61.3178	80.3592	63.7509	50.7319	65.29	116.08	84.82	77.0261	81.9892	45.5872	40.2151
ATL2	764.763	0.0733254	0.0893671	0.820497	0.411933	0.640247	0.640247	751.483	751.809	728.49	853.439	780.796	737.089	745.124	881.333	690.548	770.458	641.13	845.453
ATL3	3211.74	0.0704265	0.0704777	0.999273	0.317662	0.551579	0.551579	3279.82	3094.32	3092.7	3102.2	3081.96	2783.41	3793.06	3342.44	3510.96	2900.97	3377.33	3181.67
HPSE	167.288	-1.54347	0.185163	-8.33571	7.70363e-17	4.63177e-15	4.63177e-15	278.021	260.378	209.535	312.585	293.294	285.214	47.5376	82.1694	25.0783	69.932	43.6473	100.07
ATMIN	1374.86	-0.0739749	0.0678901	-1.08963	0.275877	0.508639	0.508639	1405.24	1455.63	1416.42	1374.76	1302.38	1317.83	1537.79	1306.76	1528.88	1192.46	1370.53	1289.69
ATN1	2314.92	-0.0559044	0.116237	-0.48095	0.630552	0.80535	0.80535	2224.17	2444.71	2540.7	2050.31	2275.8	2681.18	1964.52	1997.25	2320.63	2210.09	2553.85	2515.78
ATOH1	2.50013	0.067323	0.103608	0.649788	0.515829	NA	1	0	0	6.75918	0	0	5.15447	0	0	1.7913	9.64579	2.90982	3.74094
ATOH7	4.12659	0.0242347	0.183016	0.132418	0.894654	NA	1	2.75268	0.888663	6.75918	3.08472	1.58537	1.71816	5.52763	1.32531	6.26956	6.02862	13.5792	0
ATOH8	8.18245	0.100574	0.11101	0.905986	0.364943	NA	1	0	7.1093	18.0245	1.02824	0	5.15447	0	0	0.895652	39.7889	26.1884	0
ATOSA	297.63	-0.0994961	0.135573	-0.733892	0.463015	0.682233	0.682233	349.591	277.263	301.159	263.23	274.269	286.932	400.2	262.412	297.356	254.408	355.968	248.773
ATOSB	251.451	-0.223375	0.131537	-1.69819	0.0894717	0.243922	0.243922	337.204	359.909	320.686	185.083	217.196	191.575	278.593	169.64	293.774	171.213	330.75	161.796
ATOSBP1	0.893161	0.0672003	0.07037	0.954957	0.339599	NA	1	0	0	0.751021	0	0.792686	0	0	0	0	7.23435	1.93988	0
ATOX1	466.21	-0.184253	0.0906223	-2.0332	0.0420325	0.142335	0.142335	485.849	455.884	482.155	517.205	493.843	530.051	412.361	436.028	454.991	467.821	412.224	446.107
ATP10A	316.999	-0.0147258	0.178766	-0.0823746	0.934349	0.968504	0.968504	389.505	366.129	382.269	261.173	244.94	243.119	500.803	262.412	370.8	297.814	303.591	181.436
ATP10A-DT	0.909338	0.0635367	0.0601344	1.05658	0.290704	NA	1	0	0	1.50204	0	0	0	0	0	0	8.44007	0.96994	0
ATP10B	3.64555	0.102421	0.119631	0.856143	0.391919	NA	1	0	2.66599	16.5225	3.08472	0	1.71816	0	0	0	16.8801	1.93988	0.935235
STOM	806.433	-0.908568	0.108994	-8.33596	7.68709e-17	4.63177e-15	4.63177e-15	1204.3	1160.59	1041.67	982.998	959.943	816.984	736.28	511.571	652.93	411.152	700.297	498.48
ATP11A	2127.59	-0.0644144	0.0691812	-0.931097	0.351803	0.584256	0.584256	2215.91	2242.1	2190.73	2185.01	2120.44	2104.74	2040.8	1982.67	1994.62	1952.07	2319.13	2182.84
ATP11A-AS1	1.92279	0.159827	0.0982796	1.62625	0.103897	NA	1	0	0	2.25306	0	0	0.859079	0	0	2.68696	14.4687	0	2.80571
ATP11AUN	1.32274	0.0576108	0.0645608	0.892349	0.372206	NA	1	0	0	5.25714	0	0	0	0	0	0	9.64579	0.96994	0
ATP11B	2131.37	0.0579693	0.106399	0.544831	0.58587	0.77485	0.77485	2174.62	2014.6	1966.17	2199.41	2017.39	1731.04	2774.87	2218.57	2187.18	1867.67	2309.43	2115.5
ATP11B-DT	1.45918	0.0919351	0.131779	0.697645	0.485399	NA	1	0	0	2.25306	1.02824	0	0.859079	2.21105	0	1.7913	3.61717	3.87976	1.87047
ATP11C	1756.65	0.152224	0.105098	1.4484	0.147505	0.341542	0.341542	1547.01	1516.95	1426.94	1579.38	1638.48	1376.24	2613.46	1856.76	2062.69	1502.33	2188.18	1771.34
ATP12A	4.08634	0.0399579	0.0920271	0.434198	0.664145	NA	1	0	4.44332	15.0204	0	0	6.87263	0	0	0	16.8801	5.81964	0
STAT5A	466.746	0.908654	0.10904	8.33319	7.86934e-17	4.71185e-15	4.71185e-15	395.01	391.012	347.723	304.359	285.367	243.978	666.632	506.27	699.504	529.313	655.679	576.105
PTK7	1369.42	-0.704736	0.0848581	-8.30487	9.99261e-17	5.95855e-15	5.95855e-15	1720.43	1761.33	1537.34	1760.35	1768.48	1580.7	1108.84	1041.7	1067.62	934.436	1041.72	1110.12
ATP13A3	3847.57	-0.00327328	0.105371	-0.0310644	0.975218	0.988867	0.988867	3779.43	3470.23	3158.79	4704.2	4483.43	3859.84	3602.91	4773.78	3234.2	3829.38	2861.32	4413.37
ATP13A3-DT	7.20709	0.433666	0.194683	2.22755	0.0259108	NA	1	0	7.1093	6.00816	3.08472	3.17074	3.43631	2.21105	2.65063	7.16522	37.3775	6.78958	7.48188
ATP13A4	14.0946	0.220344	0.223058	0.987835	0.323234	NA	1	8.25805	10.664	28.5388	0	7.13417	13.7453	24.3216	9.27719	14.3304	24.1145	19.3988	9.35235
ATP13A4-AS1	0.335129	0.0174606	0.0580207	0.300938	0.763461	NA	1	0	0	0.751021	0	0	0.859079	0	0	0	2.41145	0	0
ATP13A5	2.46884	0.0843599	0.112743	0.748252	0.454308	NA	1	1.37634	0.888663	8.26123	0	0	2.57724	0	0	1.7913	10.8515	3.87976	0
ATP1A1	8260.87	-0.0355579	0.0595534	-0.597076	0.550456	0.748852	0.748852	8070.87	8390.76	8084.74	8713.31	9049.3	8735.11	7838.18	9024.06	7339.87	7854.09	7065.04	8965.16
ATP1A1-AS1	84.3458	-0.316902	0.239403	-1.32372	0.185596	0.399123	0.399123	104.602	88.8663	113.404	92.5416	66.5856	120.271	79.5979	45.0606	43.8869	75.9606	102.814	78.5598
ATP1A2	7.57931	0.169572	0.124741	1.3594	0.174021	NA	1	0	4.44332	16.5225	0	0	4.29539	0	1.32531	0.895652	42.2003	19.3988	1.87047
ATP1A3	116.58	-0.330561	0.202333	-1.63375	0.102311	0.267163	0.267163	114.236	175.955	162.971	127.502	141.891	158.07	48.6431	96.7479	85.9826	122.984	61.1062	102.876
ATP1A4	5.49926	0.111587	0.101139	1.1033	0.269895	NA	1	0	4.44332	21.7796	0	0	0	0	0	0.895652	30.1431	8.72946	0
ATP1B1	83.976	-0.206945	0.178652	-1.15837	0.246713	0.476614	0.476614	93.5912	87.089	91.6245	93.5699	95.915	93.6396	76.2813	90.1213	75.2348	74.7549	60.1363	75.7541
ATP1B1P1	2.22828	0.0715442	0.153582	0.465837	0.641332	NA	1	0	0.888663	4.50612	3.08472	1.58537	0	2.21105	1.32531	0.895652	3.61717	5.81964	2.80571
ATP1B2	4.98995	0.127695	0.11529	1.1076	0.268035	NA	1	0	0.888663	9.01225	0	0	5.15447	0	0	3.58261	27.7317	11.6393	1.87047
ARHGAP25	682.53	0.875034	0.105615	8.2851	1.18009e-16	7.008e-15	7.008e-15	511.999	507.427	479.902	442.143	486.709	473.352	1003.82	959.527	801.609	807.835	833.178	882.862
ATP1B3-AS1	0.24917	0.0174606	0.0580207	0.300938	0.763461	NA	1	0	0.888663	0	0	0	0	0	0	0.895652	1.20572	0	0
ATP1B3P1	1.3736	0.0324371	0.141895	0.2286	0.81918	NA	1	4.12902	0.888663	1.50204	0	0.792686	1.71816	1.10553	2.65063	1.7913	0	0.96994	0.935235
ATP1B4	1.29385	0.0621593	0.0748479	0.830474	0.406271	NA	1	0	0	5.25714	0	0	0.859079	0	0	0	8.44007	0.96994	0
ATP23	121.377	0.280641	0.169278	1.65787	0.0973441	0.258763	0.258763	108.731	119.97	104.392	102.824	132.379	104.808	129.347	131.206	116.435	130.218	113.483	162.731
MFSD6	589.479	0.873283	0.105576	8.27158	1.32194e-16	7.81831e-15	7.81831e-15	433.548	414.117	391.282	373.251	344.026	393.458	905.426	793.863	862.513	617.331	860.337	684.592
ATP2A1-AS1	381.64	0.176316	0.158432	1.11288	0.26576	0.497655	0.497655	312.43	325.251	413.061	290.992	335.306	387.444	385.829	318.075	456.783	407.535	511.158	435.82
ATP2A2	6882.05	-0.0270912	0.0509319	-0.53191	0.594789	0.78066	0.78066	6896.85	6938.68	6492.57	7360.14	7381.49	6802.18	6520.39	7217.66	6755.9	6782.2	6298.79	7137.72
CLEC2B	3048.88	0.349812	0.0423329	8.26335	1.41636e-16	8.34268e-15	8.34268e-15	2843.52	2901.48	2933.49	2646.69	2523.12	2632.22	3313.26	3315.93	3466.17	3292.83	3373.45	3344.4
NFIC	1077.7	0.981693	0.118882	8.25773	1.48466e-16	8.70959e-15	8.70959e-15	712.945	726.926	805.094	694.062	736.405	810.111	1419.5	1773.27	1124.04	1299.77	1287.11	1543.14
ATP2B1-AS1	48.2711	0.102396	0.225475	0.454135	0.649732	0.816465	0.816465	63.3117	42.6558	45.8123	37.0167	40.427	48.1084	40.9045	43.7353	62.6956	45.8175	60.1363	48.6322
ATP2B2	16.3487	0.237316	0.164959	1.43863	0.150255	0.345971	0.345971	1.37634	7.1093	38.302	3.08472	2.37806	15.4634	4.4221	1.32531	4.47826	84.4007	31.0381	2.80571
ATP2B2-IT1	0.263539	0.0301218	0.0580207	0.519156	0.603652	NA	1	0	0	0.751021	0	0	0	0	0	0	2.41145	0	0
ATP2B2-IT2	0.800682	0.0678485	0.0688302	0.985738	0.324262	NA	1	0	0.888663	0.751021	0	0	0	0	0	0	6.02862	1.93988	0
ATP2B3	15.7438	0.107211	0.108892	0.984567	0.324837	NA	1	0	4.44332	57.0776	1.02824	2.37806	12.0271	0	0	1.7913	83.195	22.3086	4.67618
SNX10	444.799	1.24702	0.151404	8.23633	1.77571e-16	1.0375e-14	1.0375e-14	194.064	208.836	190.008	225.185	229.879	219.924	759.496	496.992	899.235	728.257	648.89	536.825
ATP2C1	2499.4	0.0814003	0.0991572	0.820922	0.411691	0.640064	0.640064	2434.75	2299.86	2040.52	2737.18	2657.88	2382.22	2725.12	2889.18	2308.1	2488.61	2161.03	2868.37
ATP2C2	10.439	0.150812	0.121224	1.24408	0.213469	NA	1	0	4.44332	27.7878	0	0.792686	7.73171	0	0	2.68696	61.4919	19.3988	0.935235
ATP2C2-AS1	11.2	0.110941	0.226464	0.489883	0.624216	NA	1	9.63439	15.9959	17.2735	5.1412	9.51223	10.3089	13.2663	5.30125	2.68696	24.1145	16.489	4.67618
ATP4A	9.39992	0.0714052	0.0877203	0.81401	0.415639	NA	1	0	4.44332	28.5388	0	0	9.44986	0	0	0.895652	53.0519	14.5491	1.87047
ATP4B	2.79037	0.116277	0.123411	0.942193	0.346094	NA	1	0	4.44332	5.25714	0	2.37806	3.43631	0	1.32531	0	15.6744	0.96994	0
ATP5F1A	9374.88	0.0173577	0.0490944	0.353558	0.72367	0.862864	0.862864	8618.65	9198.55	8767.41	9785.76	9640.65	9814.97	9129.43	10060.5	9498.39	9555.36	8447.21	9981.77
ATP5F1AP1	0.154712	0	0.0580207	0	1	NA	1	0	0	0.751021	0	0	0	1.10553	0	0	0	0	0
ATP5F1AP2	1.07476	0.0195723	0.126425	0.154814	0.876968	NA	1	1.37634	0.888663	0.751021	1.02824	0.792686	1.71816	2.21105	1.32531	0	0	0	2.80571
ATP5F1AP3	3.16321	0.0677368	0.203821	0.332334	0.739637	NA	1	2.75268	2.66599	1.50204	4.11296	1.58537	3.43631	2.21105	3.97594	4.47826	3.61717	3.87976	3.74094
ATP5F1B	12762.4	0.0088045	0.0949742	0.0927041	0.926139	0.964907	0.964907	12934.9	12914.1	11133.9	13921.3	14136.8	12340.7	12664.9	14292.2	12614.4	12784.3	9831.31	13579.6
ATP5F1BP1	0.326124	0.0301218	0.0580207	0.519156	0.603652	NA	1	0	0	1.50204	0	0	0	0	0	0	2.41145	0	0
ST6GAL1	3946.54	-0.660921	0.0802837	-8.23233	1.83611e-16	1.06848e-14	1.06848e-14	4810.31	4936.52	4381.45	4251.77	4338.37	3844.38	4719.49	2764.6	4291.96	2387.33	4014.58	2617.72
ATP5F1CP1	5.32641	-0.0636689	0.201052	-0.316679	0.751487	NA	1	12.3871	6.22064	7.51021	5.1412	3.96343	6.01355	0	1.32531	7.16522	8.44007	3.87976	1.87047
ERG	2058.78	-0.524	0.0636613	-8.23106	1.85562e-16	1.07552e-14	1.07552e-14	2569.63	2570.01	2573	2343.36	2271.84	2427.76	1668.24	1720.26	1656.96	1474.6	1756.56	1673.14
ATP5F1E	3173.46	-0.156178	0.0726972	-2.14833	0.0316877	0.114575	0.114575	3233.03	3425.8	3372.08	3217.36	3319.77	3553.15	2874.37	2920.99	3309.43	3134.88	2741.05	2979.66
ATP5F1EP2	28.2142	0.00577854	0.249122	0.0231956	0.981494	0.991623	0.991623	24.7741	36.4352	30.7918	32.9037	29.3294	21.477	14.3718	27.8316	31.3478	30.1431	32.978	26.1866
CFLAR	604.32	0.713388	0.0867311	8.22528	1.94732e-16	1.12417e-14	1.12417e-14	491.354	452.329	483.657	404.098	447.075	416.653	818.089	738.199	775.635	672.794	847.728	704.232
ATP5MC1	2442.51	-0.188035	0.152623	-1.23203	0.217939	0.441115	0.441115	2071.39	2436.71	2932.74	2381.4	2466.05	3384.77	1699.19	2100.62	2480.96	2640.54	2333.68	2382.04
ATP5MC1P1	0.804178	0.0177627	0.0681349	0.260699	0.794325	NA	1	0	0	4.50612	0	0.792686	0	0	0	0	2.41145	1.93988	0
ATP5MC1P2	1.4933	0.106623	0.120626	0.883916	0.376742	NA	1	0	0	3.00408	1.02824	0.792686	1.71816	1.10553	0	0.895652	8.44007	0	0.935235
ATP5MC1P3	1.16632	2.4886e-05	0.103251	0.000241025	0.999808	NA	1	0	0	0	3.08472	2.37806	0	1.10553	0	0	3.61717	1.93988	1.87047
ATP5MC1P4	0.281782	0.0301218	0.0580207	0.519156	0.603652	NA	1	0	0	0	0	0	0	0	0	0	2.41145	0.96994	0
ATP5MC1P6	0.602862	0.0779584	0.0586292	1.32969	0.183622	NA	1	0	0	0	0	0	0	0	0	0	7.23435	0	0
ATP5MC1P7	0.12517	0	0.0580207	0	1	NA	1	0	0	1.50204	0	0	0	0	0	0	0	0	0
ATP5MC1P8	0.163062	0.0174606	0.0580207	0.300938	0.763461	NA	1	0	0	0.751021	0	0	0	0	0	0	1.20572	0	0
LIMCH1	176.021	-1.4053	0.171126	-8.21207	2.17408e-16	1.25009e-14	1.25009e-14	187.182	184.842	210.286	345.489	347.196	326.45	44.221	113.977	81.5043	116.955	47.5271	106.617
ATP5MC2P1	0.69368	0.0361336	0.101075	0.357491	0.720724	NA	1	0	0.888663	1.50204	1.02824	0	0.859079	0	0	0	1.20572	0.96994	1.87047
ATP5MC2P2	0.893493	0.0572656	0.0933805	0.61325	0.539711	NA	1	0	0.888663	2.25306	0	0.792686	0.859079	1.10553	0	0	4.8229	0	0
ATP5MC2P3	0.326124	0.0301218	0.0580207	0.519156	0.603652	NA	1	0	0	1.50204	0	0	0	0	0	0	2.41145	0	0
ATP5MC2P4	2.7659	-0.0260874	0.168934	-0.154424	0.877276	NA	1	0	7.1093	3.7551	3.08472	1.58537	4.29539	1.10553	0	2.68696	4.8229	1.93988	2.80571
ATP5MC3	3439.58	-0.0450883	0.102347	-0.440545	0.659543	0.822501	0.822501	3629.41	3498.67	2916.21	3922.74	3698.67	3397.66	3409.44	3751.96	3444.68	3450.78	2691.58	3463.18
ATP5ME	3229.7	-0.0582275	0.122299	-0.476108	0.633997	0.807121	0.807121	2864.17	3216.96	3292.47	3201.94	3344.34	3937.16	2434.37	3122.44	3523.49	3811.29	2897.21	3110.59
ATP5MF	1866.47	-0.230814	0.121031	-1.90706	0.0565129	0.176139	0.176139	1823.65	2015.49	2232.03	1880.65	1834.28	2487.89	1472.56	1660.62	1795.78	1931.57	1621.74	1641.34
ATP5MFP1	0.227462	0.0174606	0.0580207	0.300938	0.763461	NA	1	0	0	0	0	0	0.859079	0	0	0	0	0	1.87047
ATP5MFP2	16.1568	-0.0699179	0.253295	-0.276033	0.782523	NA	1	16.5161	14.2186	13.5184	18.5083	22.9879	8.59079	19.8995	23.8556	19.7043	8.44007	14.5491	13.0933
ATP5MFP4	1.09905	0.121653	0.112012	1.08607	0.277448	NA	1	0	0	1.50204	0	0	1.71816	0	1.32531	1.7913	1.20572	0.96994	4.67618
ATP5MFP5	1.58529	-0.0647357	0.1533	-0.422281	0.67282	NA	1	1.37634	2.66599	4.50612	1.02824	1.58537	1.71816	2.21105	0	1.7913	1.20572	0	0.935235
ATP5MFP6	0.200954	0.0301218	0.0580207	0.519156	0.603652	NA	1	0	0	0	0	0	0	0	0	0	2.41145	0	0
ATP5MF-PTCD1	2.62417	-0.128528	0.18029	-0.712899	0.475908	NA	1	1.37634	0.888663	3.00408	4.11296	2.37806	5.15447	2.21105	0	1.7913	4.8229	3.87976	1.87047
PTTG1	2417.07	-0.76759	0.09369	-8.19287	2.55073e-16	1.46087e-14	1.46087e-14	2281.97	2490.92	2464.1	3459	3467.21	3936.3	1612.96	2302.07	1425.88	1785.68	1605.25	2173.49
ATP5MGL	8.2017	0.0765999	0.246308	0.310993	0.755806	NA	1	1.37634	4.44332	6.75918	10.2824	9.51223	12.8862	4.4221	11.9278	6.26956	14.4687	4.8497	11.2228
ATP5MGP1	1.76301	0.0616344	0.16527	0.372931	0.709199	NA	1	1.37634	1.77733	1.50204	1.02824	0.792686	0.859079	3.31658	0	3.58261	1.20572	2.90982	2.80571
ATP5MGP2	0.483013	-0.00829583	0.0580726	-0.142853	0.886407	NA	1	2.75268	0	0	0	0	1.71816	0	1.32531	0	0	0	0
ATP5MGP3	0.12517	0	0.0580207	0	1	NA	1	0	0	1.50204	0	0	0	0	0	0	0	0	0
ATP5MJ	2116.97	-0.290634	0.136495	-2.12927	0.0332319	0.11879	0.11879	2032.86	2399.39	2720.2	2058.54	2077.63	2769.67	1598.59	1672.55	2086.87	2052.14	2109.62	1825.58
ATP5MK	1656.65	-0.330092	0.168536	-1.95858	0.0501619	0.161306	0.161306	1409.37	1771.11	2053.29	1724.36	1613.91	2490.47	1071.25	1391.58	1630.09	1677.16	1627.56	1419.69
ATP5MKP1	2.93598	-0.115228	0.172641	-0.667446	0.504487	NA	1	2.75268	2.66599	3.00408	3.08472	11.0976	1.71816	0	6.62657	0	2.41145	0	1.87047
ATP5PB	3694.5	-0.0524489	0.0747689	-0.701481	0.483003	0.697917	0.697917	3689.97	3843.47	3378.84	3986.49	4108.49	3761.05	3307.73	3836.78	3735.76	3901.72	3096.05	3687.63
ATP5PBP1	1.70537	-0.00131637	0.137463	-0.00957618	0.992359	NA	1	4.12902	0	0.751021	1.02824	0	3.43631	2.21105	0	2.68696	2.41145	1.93988	1.87047
ATP5PBP3	1.54537	-0.190309	0.130215	-1.4615	0.14388	NA	1	2.75268	0	3.7551	4.11296	3.17074	2.57724	0	0	0	1.20572	0.96994	0
ATP5PBP6	0.822379	0.0104843	0.0939214	0.111628	0.911118	NA	1	2.75268	1.77733	0.751021	2.05648	0	0	0	1.32531	0	1.20572	0	0
ATP5PBP7	0.191227	-0.00786165	0.0580207	-0.135497	0.892219	NA	1	0	0	1.50204	0	0.792686	0	0	0	0	0	0	0
ATP5PD	1768.98	-0.186873	0.110814	-1.68636	0.0917261	0.248154	0.248154	1640.6	1803.99	1982.69	1742.87	1768.48	2202.68	1474.77	1569.17	1779.66	1649.43	1847.74	1765.72
ATP5PDP1	0.196129	0.0047995	0.0580207	0.0827205	0.934074	NA	1	0	0	0	1.02824	0	0	0	1.32531	0	0	0	0
ATP5PDP2	1.06052	0.00932141	0.105648	0.0882309	0.929693	NA	1	2.75268	0	0	1.02824	0	1.71816	2.21105	0	0	1.20572	1.93988	1.87047
ATP5PDP4	3.44221	-0.173827	0.197141	-0.881741	0.377917	NA	1	6.88171	1.77733	3.7551	5.1412	4.75612	2.57724	2.21105	2.65063	6.26956	2.41145	1.93988	0.935235
ATP5PF	2358.03	-0.0547194	0.0805422	-0.679388	0.496892	0.708589	0.708589	2236.56	2409.17	2401.76	2500.68	2340.01	2571.22	2028.64	2307.37	2530.22	2464.5	2150.36	2355.86
ATP5PFP1	0.305966	0.0174606	0.0580207	0.300938	0.763461	NA	1	1.37634	0	0	0	0	0	0	1.32531	0	0	0.96994	0
NRCAM	307.542	1.51584	0.185415	8.17542	2.94844e-16	1.682e-14	1.682e-14	82.5805	63.9837	74.351	130.587	122.074	128.003	753.969	563.258	548.139	365.334	461.691	396.54
ATP5POP1	1.43841	0.0555988	0.111723	0.497648	0.618732	NA	1	0	0	2.25306	2.05648	0	0.859079	2.21105	1.32531	0	0	3.87976	4.67618
SENP6	2393.81	0.753	0.0922256	8.16476	3.22067e-16	1.8301e-14	1.8301e-14	1724.56	1616.48	1410.42	1917.67	1701.9	1578.13	3584.12	3102.56	3209.12	2874.45	3065.01	2941.31
ATP6AP1-DT	31.7421	0.0882047	0.249482	0.353551	0.723675	0.862864	0.862864	20.6451	28.4372	36.8	34.9602	31.7074	23.1951	21.005	41.0847	45.6783	27.7317	38.7976	30.8628
ATP6AP1L	38.4801	0.280013	0.248825	1.12534	0.260444	0.491658	0.491658	23.3978	19.5506	45.8123	22.6213	31.7074	28.3496	69.6481	47.7113	43.8869	36.1717	61.1062	31.798
ATP6AP2	1089.84	0.0481337	0.0947399	0.508061	0.61141	0.791436	0.791436	1011.61	977.529	1035.66	1020.01	1019.39	1114.22	1104.42	967.479	1346.16	1114.09	1189.15	1178.4
ATP6V0A1	13.9837	0.401966	0.192884	2.08398	0.0371617	NA	1	15.1398	6.22064	42.8082	1.02824	0.792686	3.43631	2.21105	3.97594	10.7478	55.4633	20.3687	5.61141
ATP6V0A2	1190.31	0.125379	0.0797165	1.5728	0.115764	0.28971	0.28971	1336.43	1149.04	1178.35	1144.43	1179.52	1068.69	1231.56	1293.51	1155.39	1247.92	1127.07	1171.85
ATP6V0A4	3.87241	0.179108	0.117298	1.52695	0.126774	NA	1	0	1.77733	6.75918	1.02824	0	1.71816	0	0	0	26.5259	6.78958	1.87047
ATP6V0B	1267.24	0.0733562	0.103897	0.706047	0.480159	0.695472	0.695472	1255.22	1229.91	1043.17	1343.91	1353.91	1174.36	1242.61	1420.74	1383.78	1266.01	1097	1396.31
ATP6V0C	7.21906	0.23015	0.235732	0.97632	0.328906	NA	1	13.7634	5.33198	9.01225	8.22592	4.75612	2.57724	7.73868	6.62657	4.47826	10.8515	4.8497	8.41712
ATP6V0CP1	0.371292	0.00466625	0.0584429	0.0798429	0.936362	NA	1	0	0.888663	1.50204	0	0	0.859079	0	0	0	1.20572	0	0
ATP6V0CP2	1.37774	0.01729	0.0998522	0.173156	0.862529	NA	1	0	1.77733	6.75918	0	2.37806	0	1.10553	0	0.895652	3.61717	0	0
ATP6V0CP3	1.71708	0.0595793	0.0875621	0.680424	0.496236	NA	1	0	0	3.7551	0	0	2.57724	0	0	2.68696	9.64579	1.93988	0
ATP6V0CP4	18.0949	-0.104953	0.253977	-0.413237	0.679433	0.834745	0.834745	28.9032	17.7733	15.0204	24.6778	8.71955	20.6179	16.5829	11.9278	17.0174	20.4973	22.3086	13.0933
ATP6V0D1	1033.79	0.157096	0.0726876	2.16124	0.0306765	0.111768	0.111768	999.224	982.861	889.959	994.308	976.589	931.241	1122.11	1021.82	1140.16	1141.82	1128.04	1077.39
LPIN1	2481.68	0.749519	0.0918742	8.15809	3.40353e-16	1.92645e-14	1.92645e-14	1786.49	1655.58	1497.53	1890.93	1883.42	1718.16	3589.64	3451.12	3316.6	2822.6	3037.85	3130.23
ATP6V0D2	2.44641	0.135203	0.105998	1.27553	0.202123	NA	1	0	2.66599	5.25714	0	0	1.71816	0	0	0.895652	16.8801	1.93988	0
ATP6V0E1	844.878	0.00524534	0.0902409	0.058126	0.953648	0.978776	0.978776	706.063	837.121	811.853	855.496	829.942	859.938	814.773	804.465	966.409	886.207	903.984	862.287
ATP6V0E1P1	0.301431	0.0427829	0.0580207	0.737374	0.460895	NA	1	0	0	0	0	0	0	0	0	0	3.61717	0	0
ATP6V0E1P2	0.317774	0.0174606	0.0580207	0.300938	0.763461	NA	1	0	0	1.50204	0	0	0	1.10553	0	0	1.20572	0	0
ATP6V0E1P3	0.407401	-0.0208405	0.0580804	-0.358822	0.719729	NA	1	1.37634	0	0	0	0	2.57724	0	0	0	0	0	0.935235
ATP6V0E2	1166.03	-0.133686	0.103345	-1.29359	0.195808	0.411196	0.411196	1311.65	1473.4	1427.69	603.577	630.185	714.753	1939.09	491.691	2062.69	636.622	2066.94	634.089
ATP6V0E2-AS1	32.3345	0.0837194	0.253502	0.330252	0.74121	0.873394	0.873394	26.1505	44.4332	41.3061	21.593	10.3049	16.3225	51.9597	13.2531	54.6348	28.9374	67.8958	11.2228
MSN	15960.1	0.336825	0.0413611	8.14354	3.83895e-16	2.16445e-14	2.16445e-14	13716.6	14871.8	14265.6	13112.1	13687.3	13774.5	18465.6	17610.8	19217.1	16693.3	19076.8	17029.7
ATP6V1B1	0.536083	0.04278	0.0583303	0.73341	0.463308	NA	1	0	0	0.751021	0	0	0.859079	0	0	0	4.8229	0	0
ATP6V1B1-AS1	7.22235	0.234448	0.235114	0.997164	0.318685	NA	1	6.88171	10.664	17.2735	3.08472	3.96343	4.29539	4.4221	10.6025	8.95652	6.02862	5.81964	4.67618
ATP6V1B2	2055.01	0.0861796	0.0677562	1.27191	0.203406	0.421932	0.421932	1823.65	2019.93	1873.05	2113.03	2076.84	2146.84	1920.3	2314	1964.16	2034.06	1992.26	2382.04
ATP6V1C1	1606.85	-0.000914197	0.0841987	-0.0108576	0.991337	0.996066	0.996066	1597.93	1549.83	1477.26	1708.94	1735.19	1615.93	1608.54	1826.28	1555.75	1504.74	1375.37	1726.44
ATP6V1C2	28.7553	0.368209	0.247327	1.48876	0.136552	0.324845	0.324845	22.0215	23.1052	23.2816	31.8754	13.4757	18.0406	43.1155	33.1328	42.0956	30.1431	32.978	31.798
CSRP2	166.965	-1.52387	0.187359	-8.13344	4.17288e-16	2.32558e-14	2.32558e-14	272.516	231.052	225.306	228.269	272.684	258.583	98.3918	60.9644	100.313	50.6404	105.723	99.1349
HMCES	921.271	-0.885093	0.108821	-8.13351	4.17027e-16	2.32558e-14	2.32558e-14	1325.42	1347.21	1052.18	1233.89	1173.18	1121.96	648.944	616.271	620.687	554.633	682.838	678.046
ATP6V1E1P1	1.39493	0.0906751	0.112719	0.804434	0.421146	NA	1	0	1.77733	0	0	2.37806	0.859079	1.10553	2.65063	0	6.02862	1.93988	0
ATP6V1E1P3	2.43936	-0.0267413	0.150143	-0.178105	0.85864	NA	1	5.50537	3.55465	4.50612	2.05648	0.792686	3.43631	0	1.32531	4.47826	3.61717	0	0
ATP6V1E2	157.635	0.000242327	0.159725	0.00151715	0.998789	0.999405	0.999405	130.752	187.508	144.947	162.462	137.927	158.07	170.251	143.134	178.235	150.716	164.89	162.731
ATP6V1F	1513.07	-0.153716	0.119791	-1.2832	0.199424	0.416796	0.416796	1443.78	1647.58	1858.02	1304.84	1402.26	1727.61	1394.07	1241.82	1716.96	1354.03	1702.24	1363.57
ATP6V1FNB	50.5218	-0.185567	0.215947	-0.859319	0.390165	0.621535	0.621535	61.9354	57.7631	65.3388	59.6379	48.3538	53.2629	37.5879	35.7835	42.9913	57.8748	43.6473	42.0856
SH2D2A	896.208	-0.725588	0.0892084	-8.13363	4.16639e-16	2.32558e-14	2.32558e-14	967.568	982.861	914.743	1064.23	1095.49	1129.69	813.667	600.367	980.739	693.291	850.637	661.211
ATP6V1G1P2	0.359719	0.0427829	0.0580207	0.737374	0.460895	NA	1	0	0	0	0	0	0	0	0	0	2.41145	0.96994	0.935235
ATP6V1G1P3	1.1334	0.0721121	0.109277	0.659901	0.509317	NA	1	0	0.888663	0	1.02824	0.792686	0.859079	0	0	0	2.41145	3.87976	3.74094
ATP6V1G1P4	0.878373	0.0562749	0.114464	0.491639	0.622975	NA	1	0	0.888663	1.50204	0	0.792686	0.859079	0	1.32531	1.7913	2.41145	0.96994	0
ATP6V1G1P5	0.151992	0.0174606	0.0580207	0.300938	0.763461	NA	1	0	0.888663	0	0	0	0	0	0	0	0	0	0.935235
ATP6V1G2	21.0016	-0.140546	0.254483	-0.552281	0.580756	0.770124	0.770124	26.1505	29.3259	31.5429	16.4518	17.4391	23.1951	17.6884	6.62657	16.1217	25.3202	28.1283	14.0285
ATP6V1G3	0.576313	0	0.0667074	0	1	NA	1	1.37634	0.888663	3.7551	0	0	0	0	0	0.895652	0	0	0
ATP6V1H	788.228	-0.0336941	0.0782496	-0.430597	0.666761	0.82597	0.82597	706.063	774.026	754.025	802.027	766.527	719.908	933.064	767.356	903.713	710.172	867.126	754.735
ATP7A	277.328	0.0790395	0.114447	0.690618	0.489805	0.703223	0.703223	267.01	277.263	277.127	308.472	251.281	274.905	269.748	295.545	253.47	291.785	266.733	294.599
ATP7B	57.2598	0.224387	0.229478	0.977815	0.328166	0.56084	0.56084	48.172	71.9817	55.5755	46.2708	42.805	48.9675	71.8592	45.0606	50.1565	77.1663	79.5351	49.5675
ATP7BP1	0.181305	0.0174606	0.0580207	0.300938	0.763461	NA	1	0	0	0	0	0	0	0	0	0	1.20572	0.96994	0
ATP8A1	1935.53	0.169176	0.111199	1.52139	0.128162	0.311833	0.311833	2031.48	1903.52	1719.84	1940.29	1827.93	1512.84	2360.3	2193.39	2054.63	1779.65	1901.08	2001.4
ATP8A1-DT	1.85893	0.0504008	0.13264	0.379983	0.703958	NA	1	1.37634	0.888663	0	1.02824	2.37806	0.859079	8.84421	2.65063	0	2.41145	0	1.87047
ATP8A2	21.463	-0.062475	0.240942	-0.259295	0.795408	0.903249	0.903249	17.8924	18.6619	45.0612	22.6213	19.0245	19.7588	9.94973	2.65063	24.1826	33.7603	27.1583	16.8342
ATP8A2P2	0.191271	0.0174606	0.0580207	0.300938	0.763461	NA	1	0	0	0	0	0	0	0	1.32531	0	0	0.96994	0
ATP8A2P3	1.29979	0.0863765	0.0876905	0.985016	0.324616	NA	1	0	0.888663	4.50612	0	0.792686	0	0	0	0	8.44007	0.96994	0
ATP8B1	72.7539	0.280025	0.209419	1.33715	0.181173	0.392569	0.392569	45.4193	41.7672	64.5878	68.8921	72.1344	73.8808	75.1758	84.82	95.8348	102.487	60.1363	87.9121
ATP8B1-AS1	54.4996	0.147868	0.249225	0.593311	0.552973	0.750733	0.750733	59.1827	37.3238	53.3225	46.2708	50.7319	52.4038	86.231	76.8682	60.0087	65.1091	30.0681	36.4742
LMO2	798.956	1.03883	0.127752	8.13162	4.23575e-16	2.35157e-14	2.35157e-14	560.171	572.299	582.792	556.278	530.307	491.393	948.541	1138.44	827.582	947.699	1107.67	1324.29
ATP8B3	272.261	-0.316995	0.143378	-2.2109	0.0270428	0.101912	0.101912	297.29	303.034	311.674	304.359	277.44	278.341	238.794	177.592	281.235	262.848	301.651	232.874
H3P16	366.705	0.856181	0.105636	8.10499	5.27487e-16	2.91728e-14	2.91728e-14	222.967	255.046	229.061	289.964	257.623	270.61	467.637	516.872	472.009	500.376	415.134	503.157
ATP9A	20.8774	-0.170779	0.184674	-0.924758	0.355092	0.587702	0.587702	22.0215	26.6599	35.298	33.9319	34.8782	30.9268	1.10553	0	0	44.6118	14.5491	6.54665
ATP9B	590.608	0.0898394	0.100364	0.895132	0.370717	0.601937	0.601937	602.838	567.856	561.763	530.572	517.624	519.743	799.295	571.21	621.582	540.164	693.507	561.141
TMEM65	2868.05	0.626765	0.0773608	8.10184	5.41322e-16	2.98241e-14	2.98241e-14	2696.25	2506.03	2301.13	2039	1891.35	1754.24	4132.46	2840.15	3926.54	2880.48	4307.5	3141.46
ENSG00000227706	120.614	-1.73482	0.214532	-8.08651	6.13991e-16	3.36997e-14	3.36997e-14	139.011	199.949	196.016	159.377	222.745	258.583	43.1155	45.0606	34.9304	48.229	60.1363	40.2151
ATPSCKMT	192.351	-0.270845	0.15115	-1.7919	0.0731489	0.212249	0.212249	183.053	220.388	214.041	214.902	196.586	171.816	241.005	166.989	207.791	156.744	185.259	149.638
ATR	1494.96	0.212073	0.115358	1.83839	0.0660052	0.196915	0.196915	1493.33	1316.11	1273.73	1539.28	1408.6	1286.04	1741.2	1856.76	1443.79	1374.53	1492.74	1713.35
ATRAID	757.074	0.040713	0.132174	0.308026	0.758062	0.88279	0.88279	765.246	669.163	588.049	800.999	825.979	658.054	856.783	841.574	875.948	684.851	689.627	828.618
ATRIP	323.123	-0.166094	0.122348	-1.35755	0.174606	0.383339	0.383339	328.946	349.245	310.171	358.856	355.916	332.463	344.924	298.195	309	292.991	263.824	332.944
ATRN	1086.3	-0.0227311	0.0716997	-0.317032	0.751219	0.88025	0.88025	1109.33	1175.7	1085.22	1099.19	1035.25	975.913	1168.54	1035.07	1147.33	965.785	1183.33	1054.95
CBX1	2631.63	-0.387489	0.0479954	-8.07347	6.83294e-16	3.7362e-14	3.7362e-14	2715.52	2908.59	2823.84	3080.61	3266.66	3194.91	2093.87	2458.46	2124.49	2352.37	2092.16	2468.09
ATRX	2672.86	0.023739	0.0883101	0.268814	0.788073	0.899634	0.899634	2776.08	2489.15	2624.82	2553.12	2436.72	2523.97	3180.6	2707.61	2636.8	2270.38	3212.44	2662.61
DLG1	1963.61	-0.508855	0.063033	-8.07283	6.86863e-16	3.7416e-14	3.7416e-14	2177.37	2246.54	2166.69	2296.06	2252.02	2283.43	1710.25	1512.18	1733.98	1575.88	1930.18	1678.75
RAB11FIP3	1094.53	-0.614149	0.076096	-8.07071	6.98895e-16	3.79288e-14	3.79288e-14	1347.44	1448.52	1266.97	1210.24	1280.98	1330.71	901.004	830.971	953.869	787.338	923.383	852.935
ATXN1-AS1	9.93179	0.604145	0.242596	2.49034	0.0127622	NA	1	4.12902	5.33198	12.0163	3.08472	1.58537	1.71816	13.2663	10.6025	25.9739	10.8515	19.3988	11.2228
ATXN1L	1061.01	0.0713881	0.0775544	0.920491	0.357316	0.589352	0.589352	1134.11	1100.16	1003.36	1013.84	1025.74	984.504	1144.22	1114.59	1075.68	971.814	1069.84	1094.23
ATXN2	2114.76	-0.0414109	0.0858517	-0.482354	0.629554	0.804612	0.804612	2119.57	2166.56	2238.04	2079.1	2054.64	2145.98	2001	1982.67	2046.56	1867.67	2434.55	2240.82
ATXN2-AS	7.1303	-0.211994	0.227219	-0.932996	0.350822	NA	1	6.88171	15.1073	5.25714	11.3106	8.71955	6.01355	11.0553	5.30125	4.47826	4.8229	1.93988	4.67618
CHN1	126.998	-1.42565	0.176713	-8.06759	7.1701e-16	3.87667e-14	3.87667e-14	192.688	195.506	190.759	203.592	198.172	194.152	69.6481	56.9885	39.4087	69.932	51.4068	61.7255
ATXN3	730.947	0.174492	0.0956456	1.82436	0.0680979	0.201211	0.201211	725.332	654.945	606.074	685.836	702.32	649.463	881.104	747.477	822.209	752.372	736.184	808.043
CPNE8	657.433	0.772876	0.0959865	8.05193	8.15012e-16	4.39016e-14	4.39016e-14	668.902	612.289	608.327	384.562	395.55	359.954	1032.56	705.067	915.356	605.274	921.443	679.916
ATXN7L1	469.012	0.0949698	0.100809	0.942073	0.346155	0.579325	0.579325	429.419	462.993	423.576	476.075	448.66	418.371	489.748	503.619	487.235	447.324	554.806	486.322
ATXN7L2	401.609	-0.125072	0.120416	-1.03867	0.298959	0.532012	0.532012	367.483	439	396.539	425.691	445.49	425.244	394.673	430.727	418.269	381.009	322.02	373.159
ATXN7L3	1630.33	0.0296252	0.0947957	0.312516	0.754648	0.881603	0.881603	1847.05	1628.92	1516.31	1566.01	1587.75	1430.37	1920.3	1647.36	1825.34	1509.57	1557.72	1527.24
ATXN7L3-AS1	13.3222	0.21946	0.249978	0.877916	0.379989	NA	1	11.0107	13.3299	9.01225	15.4236	5.5488	6.87263	19.8995	14.5784	25.0783	18.0859	12.6092	8.41712
ATXN7L3B	2359.48	-0.0378434	0.0755463	-0.50093	0.61642	0.795117	0.795117	2361.8	2426.94	2247.8	2404.03	2414.52	2277.42	2594.67	2320.62	2492.6	2132.93	2190.12	2450.32
ATXN7L3P1	0.799277	0.040625	0.0594938	0.682845	0.494705	NA	1	0	0.888663	0	0	0	0	0	0	0	4.8229	3.87976	0
ATXN8OS	1.79025	0.00286615	0.0987385	0.0290276	0.976843	NA	1	0	1.77733	6.00816	0	0	4.29539	0	0	0	3.61717	4.8497	0.935235
AUH	329.191	-0.109497	0.138652	-0.789725	0.429688	0.653404	0.653404	348.214	323.473	366.498	263.23	280.611	349.645	380.301	322.051	419.165	250.791	393.796	252.514
AUNIP	389.245	-0.0747516	0.10694	-0.699004	0.48455	0.699246	0.699246	389.505	407.896	370.253	434.946	476.404	416.653	331.658	429.401	313.478	411.152	270.613	418.985
LRRK1	2184.52	1.37866	0.171256	8.0503	8.25887e-16	4.43226e-14	4.43226e-14	1190.54	1071.73	1246.69	1142.37	1058.24	1005.98	4077.18	4254.26	2517.68	2226.97	3275.49	3147.07
ATRNL1	1473.06	-1.25413	0.155826	-8.04829	8.39596e-16	4.4892e-14	4.4892e-14	2083.78	2025.26	1707.07	2248.76	2055.43	1861.62	933.064	636.15	1479.62	899.47	951.511	794.95
LINC00467	47.6444	1.91499	0.238183	8.03997	8.98588e-16	4.78696e-14	4.78696e-14	8.25805	15.9959	20.2776	10.2824	10.3049	7.73171	87.3365	91.4466	97.6261	78.3721	80.505	63.596
AURKAP1	1.6203	0.136537	0.150695	0.906052	0.364908	NA	1	0	0.888663	1.50204	1.02824	1.58537	1.71816	2.21105	2.65063	0.895652	6.02862	0	0.935235
AURKAP2	0.632418	0.0691296	0.0587961	1.17575	0.239694	NA	1	0	0	0	0	0	0	0	0	0.895652	4.8229	0	1.87047
AURKB	1900.84	-0.122452	0.0986016	-1.24189	0.214278	0.435712	0.435712	2035.61	1962.17	1779.17	1983.48	2148.97	2123.64	1846.23	2082.07	1491.26	1655.46	1710.97	1991.12
AURKBP1	2.00058	0.125791	0.130139	0.966588	0.33375	NA	1	1.37634	0	3.7551	0	1.58537	2.57724	0	2.65063	2.68696	8.44007	0	0.935235
AURKC	11.3458	-0.525407	0.249389	-2.10678	0.0351368	NA	1	11.0107	16.8846	21.7796	17.4801	14.2683	21.477	3.31658	7.95188	4.47826	10.8515	2.90982	3.74094
AUTS2	3414.17	0.010507	0.0886171	0.118566	0.905619	0.957578	0.957578	3343.13	3563.54	3835.46	3153.61	3172.33	3751.6	3022.51	3131.72	3394.52	3496.6	3581.99	3523.03
PLXNB1	1702.02	-0.628407	0.0781798	-8.03797	9.13395e-16	4.84802e-14	4.84802e-14	2312.25	2115.91	2099.1	2093.5	1998.36	1928.63	1365.32	1422.06	1388.26	1245.51	1264.8	1190.55
AVIL	14.8635	-0.114036	0.22948	-0.496932	0.619237	NA	1	11.0107	14.2186	20.2776	23.6495	3.17074	25.7724	12.1608	6.62657	11.6435	27.7317	16.489	5.61141
AVL9	529.59	0.00258504	0.0954795	0.0270743	0.9784	0.990085	0.990085	477.591	502.095	457.372	549.08	528.722	537.783	587.034	569.885	540.078	476.261	558.685	570.493
AVP	1.94355	0.0269226	0.0875259	0.307596	0.758389	NA	1	0	0	2.25306	0	0	3.43631	0	0	0	6.02862	10.6693	0.935235
AVPI1	6.54223	-0.282409	0.210787	-1.33978	0.180316	NA	1	2.75268	11.5526	8.26123	10.2824	11.8903	12.0271	2.21105	0	1.7913	12.0572	1.93988	3.74094
AVPR1A	2.39327	0.0727566	0.0794377	0.915895	0.359722	NA	1	0	0	5.25714	0	0	3.43631	0	0	0	18.0859	1.93988	0
AVPR1B	5.66052	0.116178	0.103089	1.12697	0.259755	NA	1	0	2.66599	14.2694	0	0	5.15447	0	0	0	36.1717	8.72946	0.935235
AVPR1B-DT	0.811116	0.0226839	0.0595671	0.380812	0.703343	NA	1	0	0	5.25714	0	0	0.859079	0	0	0	3.61717	0	0
AVPR2	5.53161	0.190571	0.141915	1.34285	0.179321	NA	1	1.37634	0.888663	17.2735	1.02824	0	3.43631	0	2.65063	0.895652	25.3202	11.6393	1.87047
AWAT1	1.08389	0.0399988	0.0615673	0.649675	0.515902	NA	1	0	0	6.00816	0	0	0	0	0	0	6.02862	0.96994	0
AWAT2	1.438	0.0512182	0.0791092	0.647437	0.517349	NA	1	0	1.77733	7.51021	0	0	0	0	0	0	6.02862	1.93988	0
AXDND1	7.01951	0.120386	0.214192	0.562049	0.574083	NA	1	2.75268	8.88663	18.0245	6.16944	3.17074	5.15447	3.31658	6.62657	6.26956	13.263	8.72946	1.87047
AXIN1	1000.5	-0.0120748	0.0789403	-0.152961	0.878429	0.943896	0.943896	1047.4	1048.62	938.776	992.252	1047.93	976.772	952.963	936.996	1029.1	982.665	985.459	1067.1
EID1	3679.63	-0.537396	0.0669064	-8.03205	9.58597e-16	5.06937e-14	5.06937e-14	3939.09	4103.85	3966.89	4163.34	4470.75	4589.2	2949.54	2997.86	3526.18	3052.89	3393.82	3002.11
AXL	9.10894	0.114612	0.113357	1.01107	0.311984	NA	1	0	9.77529	30.7918	0	0	8.59079	0	1.32531	0.895652	48.229	9.6994	0
AZGP1	2.99108	0.100178	0.100536	0.996438	0.319037	NA	1	0	6.22064	11.2653	0	0.792686	0	0	0	0	15.6744	1.93988	0
RAB27A	579.249	0.636813	0.0793234	8.02806	9.90244e-16	5.21769e-14	5.21769e-14	433.548	439.888	425.078	469.906	492.258	446.721	685.426	738.199	686.069	740.315	655.679	737.901
CST7	461.964	-0.737618	0.0919173	-8.02479	1.01696e-15	5.33905e-14	5.33905e-14	480.343	479.878	479.151	538.798	544.575	534.347	552.763	315.425	492.609	320.723	488.85	316.11
AZIN2	14.4632	0.285653	0.207174	1.37881	0.167954	NA	1	12.3871	9.77529	26.2857	8.22592	4.75612	11.168	8.84421	3.97594	8.06087	57.8748	19.3988	2.80571
AZU1	3.74778	0.129323	0.107685	1.20094	0.229776	NA	1	0	3.55465	12.0163	0	0	1.71816	0	0	0.895652	22.9088	3.87976	0
AZU1P1	0.143413	0	0.0580207	0	1	NA	1	0	0	0.751021	0	0	0	0	0	0	0	0.96994	0
GNAI1	588.413	0.993657	0.123835	8.02407	1.02297e-15	5.35122e-14	5.35122e-14	295.913	363.463	313.176	303.331	268.721	281.778	1072.36	515.547	1142.85	573.925	1242.49	687.398
B3GALNT1	376.767	-0.0548117	0.126493	-0.433316	0.664785	0.825003	0.825003	393.634	362.575	316.931	421.579	473.234	386.585	338.291	441.329	311.687	366.54	285.162	423.662
B3GALNT1P1	0.460299	0.0170263	0.0581786	0.292656	0.769785	NA	1	0	0	2.25306	0	0	0.859079	0	0	0	2.41145	0	0
B3GALNT2	988.487	-0.118909	0.0974367	-1.22037	0.222323	0.446987	0.446987	1102.45	1028.18	925.257	1088.91	1127.2	969.9	967.335	1044.35	888.487	892.236	838.998	988.544
B3GALNT2P1	0.777418	0.0414103	0.0594312	0.696777	0.485942	NA	1	0	0	4.50612	0	0	0	0	0	0	4.8229	0	0
MAPRE2	2871.48	-0.454075	0.0567782	-7.99734	1.27133e-15	6.62647e-14	6.62647e-14	3026.58	3113.88	2883.17	3534.06	3675.69	3483.56	2343.71	2722.19	2314.36	2405.42	2306.52	2648.59
B3GALT1-AS1	0.805555	0.0403621	0.0684917	0.589299	0.555661	NA	1	0	0	3.00408	0	0	0	1.10553	0	0	3.61717	1.93988	0
B3GALT2	0.140521	0.0174606	0.0580207	0.300938	0.763461	NA	1	0	0	0.751021	0	0	0	0	0	0	0	0	0.935235
B3GALT4	48.343	-0.304022	0.227403	-1.33693	0.181245	0.392569	0.392569	44.0429	70.2044	50.3184	43.1861	51.5246	41.2358	53.0652	29.1569	55.5304	37.3775	70.8056	33.6685
B3GALT5	6.57134	0.205192	0.143392	1.43098	0.152436	NA	1	0	2.66599	15.0204	5.1412	0.792686	4.29539	0	1.32531	0.895652	40.9946	6.78958	0.935235
B3GALT5-AS1	4.04501	0.0731766	0.110296	0.663456	0.507038	NA	1	1.37634	0	13.5184	0	1.58537	6.01355	0	0	0	19.2916	5.81964	0.935235
B3GALT6	793.911	0.0729781	0.102378	0.712827	0.475953	0.69286	0.69286	750.106	846.896	717.225	741.361	787.137	837.602	818.089	873.381	849.078	819.892	681.868	804.302
B3GALT9	119.516	0.241873	0.185725	1.30232	0.192807	0.407629	0.407629	126.623	110.194	101.388	77.118	123.659	120.271	142.613	129.881	121.809	122.984	117.363	140.285
B3GAT1	9.17315	0.19579	0.147308	1.32912	0.183807	NA	1	1.37634	4.44332	31.5429	2.05648	0	4.29539	0	1.32531	4.47826	42.2003	16.489	1.87047
B3GAT1-DT	5.51615	0.112199	0.107902	1.03983	0.298421	NA	1	0	3.55465	19.5265	0	0	6.01355	0	0	0	31.3488	3.87976	1.87047
B3GAT2	6.77015	0.0869206	0.166603	0.521723	0.601863	NA	1	1.37634	1.77733	15.0204	3.08472	5.5488	10.3089	2.21105	0	3.58261	27.7317	8.72946	1.87047
B3GAT3	532.377	0.0434962	0.112962	0.38505	0.7002	0.84882	0.84882	538.15	462.105	457.372	501.781	558.844	548.092	558.291	629.524	592.026	499.17	507.279	535.89
B3GAT3P1	4.33386	0.111131	0.198367	0.560232	0.575321	NA	1	9.63439	4.44332	7.51021	2.05648	0.792686	6.01355	2.21105	2.65063	4.47826	8.44007	0.96994	2.80571
B3GLCT	304.848	0.170675	0.122375	1.39468	0.163111	0.367114	0.367114	312.43	305.7	304.163	263.23	262.379	280.919	333.869	361.81	351.096	276.111	325.9	280.571
PAX5	26895.3	-0.477729	0.0597403	-7.99677	1.27728e-15	6.63364e-14	6.63364e-14	32309.6	33915.8	33054.7	31575.2	31369	30790.2	19645.2	21837.2	21172.3	20773.4	21925.5	24375
B3GNT3	2.74654	0.0841816	0.0987408	0.852552	0.393908	NA	1	0	3.55465	12.7673	0	0	0	0	0	0	10.8515	4.8497	0.935235
B3GNT4	8.56681	0.175615	0.194598	0.902451	0.366817	NA	1	0	7.99797	17.2735	3.08472	3.96343	8.59079	4.4221	2.65063	6.26956	21.703	18.4289	8.41712
B3GNT5	29.6826	-0.232857	0.247534	-0.940708	0.346855	0.58016	0.58016	28.9032	31.1032	36.049	21.593	33.2928	32.645	30.9547	19.8797	40.3043	32.5546	33.9479	14.9638
B3GNT6	3.85502	0.0830486	0.101358	0.81936	0.412581	NA	1	0	0	9.01225	0	0	3.43631	0	1.32531	1.7913	18.0859	12.6092	0
B3GNT7	9.83899	0.285369	0.186869	1.52711	0.126733	NA	1	4.12902	0	19.5265	3.08472	2.37806	6.87263	6.63316	9.27719	8.06087	34.966	19.3988	3.74094
B3GNT8	8.34302	-0.156516	0.189304	-0.826799	0.408351	NA	1	2.75268	11.5526	24.0327	10.2824	7.13417	18.0406	2.21105	2.65063	0	15.6744	4.8497	0.935235
B3GNT9	54.8545	0.329325	0.223998	1.47021	0.141504	0.332264	0.332264	52.301	54.2084	69.8449	45.2426	49.1465	42.0948	42.01	51.6872	46.5739	73.5492	70.8056	60.7903
B3GNTL1	238.677	0.105522	0.140161	0.752862	0.451533	0.673188	0.673188	258.752	232.83	265.11	228.269	222.745	245.696	218.894	212.05	222.122	303.842	215.327	238.485
B3GNTL1P1	0.163062	0.0174606	0.0580207	0.300938	0.763461	NA	1	0	0	0.751021	0	0	0	0	0	0	1.20572	0	0
B4GALNT1	8.74108	0.082778	0.120203	0.688653	0.491041	NA	1	0	4.44332	20.2776	1.02824	0	12.8862	0	0	1.7913	37.3775	25.2184	1.87047
B4GALNT2	3.1333	0.0724259	0.100635	0.719686	0.471718	NA	1	0	1.77733	9.01225	0	0	5.15447	0	0	0.895652	16.8801	3.87976	0
B4GALNT2P1	0.56497	0.0664237	0.0583888	1.13761	0.255283	NA	1	0	0	0.751021	0	0	0	0	0	0	6.02862	0	0
GSN	2015.11	-1.05976	0.132668	-7.98804	1.37103e-15	7.09509e-14	7.09509e-14	4097.37	4026.53	3413.39	864.75	848.174	776.607	3361.9	299.521	2622.47	343.631	3063.07	463.877
B4GALNT4	10.2974	0.144404	0.137241	1.05219	0.29271	NA	1	1.37634	2.66599	33.0449	2.05648	0.792686	6.87263	0	0	3.58261	47.0232	25.2184	0.935235
B4GALT1	1085.96	-0.00915223	0.071023	-0.128863	0.897466	0.953673	0.953673	1032.26	1131.27	1134.79	1079.65	1097.08	1049.79	1123.21	1035.07	1048.81	1036.92	1133.86	1128.83
B4GALT1-AS1	8.54249	-0.361389	0.230179	-1.57004	0.116407	NA	1	15.1398	7.1093	15.7714	8.22592	6.34149	18.8997	4.4221	1.32531	6.26956	8.44007	7.75952	2.80571
ADGRL1	2078.44	-0.475749	0.0595623	-7.98741	1.37802e-15	7.10586e-14	7.10586e-14	2372.81	2432.27	2379.98	2536.67	2453.36	2526.55	1552.16	1757.37	1646.21	1688.01	1670.24	1925.65
B4GALT3	700.485	-0.145822	0.0756599	-1.92733	0.053938	0.170498	0.170498	765.246	716.262	729.241	746.502	773.662	748.257	635.677	648.078	600.982	711.377	645.01	685.527
B4GALT4	366.661	0.276196	0.130911	2.1098	0.0348753	0.123224	0.123224	421.161	431.89	473.894	206.676	196.586	236.247	522.914	223.978	517.687	285.757	609.122	274.024
B4GALT5	1264.4	-0.0777269	0.0923402	-0.841745	0.399931	0.630371	0.630371	1101.07	1279.67	1223.41	1451.88	1449.03	1455.28	918.692	1249.77	1138.37	1385.38	1039.78	1480.48
B4GALT6	140.779	0.0467414	0.180525	0.258919	0.795698	0.903328	0.903328	115.613	121.747	131.429	152.18	128.415	113.398	190.15	155.062	185.4	145.893	140.641	109.423
B4GALT7	386.806	0.0899303	0.10748	0.836716	0.402752	0.632478	0.632478	428.042	383.014	349.225	345.489	374.148	372.84	428.944	396.269	411.104	395.478	380.216	376.9
B4GAT1	246.801	-0.0556244	0.141268	-0.393752	0.693764	0.844422	0.844422	268.387	293.259	246.335	282.766	277.44	244.837	164.723	259.761	230.183	245.968	182.349	265.607
B4GAT1-DT	143.92	-0.328052	0.184216	-1.7808	0.0749458	0.216069	0.216069	167.914	155.516	170.482	156.293	157.745	160.648	108.342	88.796	140.617	159.156	147.431	114.099
B9D1	15.5811	0.320128	0.20076	1.59458	0.110805	NA	1	5.50537	7.1093	42.0572	4.11296	2.37806	7.73171	11.0553	6.62657	8.95652	51.8461	34.9178	4.67618
B9D2	99.134	-0.157598	0.193806	-0.813173	0.416119	0.642742	0.642742	114.236	116.415	112.653	87.4004	110.183	128.003	97.2863	106.025	68.0696	100.075	67.8958	81.3655
BAALC	8.06691	0.185756	0.19518	0.951712	0.341243	NA	1	9.63439	6.22064	7.51021	1.02824	0.792686	2.57724	5.52763	0	18.8087	15.6744	27.1583	1.87047
BAALC-AS1	22.7077	0.218599	0.252765	0.864828	0.387133	0.618542	0.618542	22.0215	20.4393	27.7878	16.4518	21.4025	17.1816	12.1608	9.27719	21.4956	42.2003	35.8878	26.1866
BAALC-AS2	1.23432	0.072317	0.0744881	0.970854	0.331621	NA	1	0	0	4.50612	0	0	0	0	0	0.895652	8.44007	0.96994	0
BAAT	9.54423	0.147492	0.240582	0.613063	0.539835	NA	1	11.0107	8.88663	21.0286	13.3671	6.34149	3.43631	6.63316	6.62657	7.16522	12.0572	5.81964	12.1581
BABAM1	450.104	-0.135535	0.134095	-1.01074	0.312141	0.546346	0.546346	470.709	448.775	482.906	421.579	408.233	514.588	397.989	376.389	538.287	452.147	503.399	386.252
CREB3L2	2724.87	-0.612279	0.0769681	-7.95497	1.79175e-15	9.20654e-14	9.20654e-14	3663.82	3515.55	3553.08	2881.13	2817.21	2893.38	2418.89	1876.64	2420.95	1784.47	2973.84	1899.46
ALG1	528.417	0.857098	0.107799	7.95091	1.85148e-15	9.47982e-14	9.47982e-14	367.483	364.352	341.714	373.251	382.867	378.854	752.863	713.018	694.13	710.172	567.415	694.88
BACE1-AS	158.415	-0.0332274	0.140681	-0.23619	0.813285	0.913315	0.913315	137.634	163.514	149.453	169.66	169.635	164.943	156.985	166.989	138.826	153.127	159.07	171.148
BACE2	9.63498	0.0740981	0.17501	0.423393	0.672008	NA	1	1.37634	11.5526	26.2857	12.3389	3.17074	10.3089	4.4221	0	4.47826	34.966	4.8497	1.87047
BACH1	1196.66	-0.0521372	0.128231	-0.406587	0.684311	0.838535	0.838535	1249.72	1261.9	983.086	1372.7	1352.32	1047.22	1281.3	1245.79	1209.13	1187.64	973.82	1195.23
BACH1-AS1	0.451294	0.0291251	0.0581383	0.500963	0.616397	NA	1	0	0	3.00408	0	0	0	0	0	0	2.41145	0	0
BACH1-IT1	19.1175	-0.167327	0.254388	-0.657762	0.510691	0.718927	0.718927	15.1398	26.6599	21.0286	18.5083	23.7806	18.0406	15.4774	18.5544	17.0174	8.44007	26.1884	20.5752
BACH1-IT2	13.5717	0.136458	0.254462	0.536263	0.591777	NA	1	8.25805	10.664	13.5184	15.4236	14.2683	9.44986	13.2663	11.9278	13.4348	19.2916	17.4589	15.899
BACH1-IT3	1.41147	0.0716458	0.133967	0.534802	0.592787	NA	1	1.37634	0.888663	0.751021	1.02824	1.58537	0	2.21105	0	0	2.41145	3.87976	2.80571
BACH2	36.6164	0.0591096	0.252658	0.233951	0.815023	0.913639	0.913639	35.7849	32.8805	47.3143	58.6097	23.7806	43.813	24.3216	29.1569	12.5391	47.0232	26.1884	57.9846
BAD	361.7	-0.195141	0.119409	-1.63423	0.102211	0.267086	0.267086	324.817	391.012	354.482	367.082	405.063	423.526	305.125	361.81	374.383	354.483	355.968	322.656
BAG1	1538.89	-0.173059	0.105961	-1.63324	0.102419	0.26735	0.26735	1599.31	1727.56	1573.39	1730.53	1840.62	1663.18	1352.06	1651.34	1360.5	1499.92	1000.01	1468.32
BAG2	829.886	0.258572	0.124417	2.07827	0.0376843	0.130856	0.130856	728.085	675.384	669.91	847.27	783.174	776.607	929.747	1070.85	964.617	952.522	667.319	893.15
BAG3	31.9139	-0.0488234	0.24895	-0.196117	0.844518	0.927332	0.927332	59.1827	38.2125	45.0612	24.6778	26.1586	21.477	26.5326	27.8316	28.6609	26.5259	44.6172	14.0285
DLX2	127.012	1.68339	0.211792	7.94835	1.89018e-15	9.64392e-14	9.64392e-14	16.5161	25.7712	25.5347	50.3838	45.1831	79.8943	165.829	213.375	163.904	224.265	184.289	329.203
BAG5	1407.93	-0.130796	0.0769387	-1.7	0.0891314	0.243249	0.243249	1538.75	1487.62	1383.38	1527.97	1483.91	1469.02	1381.91	1378.33	1373.03	1311.83	1167.81	1391.63
MYO1G	475.065	1.06737	0.134535	7.93374	2.12645e-15	1.08113e-13	1.08113e-13	298.666	263.044	238.074	314.642	275.062	280.919	798.19	710.368	646.661	542.576	649.86	682.722
HSPA2	110.018	-1.64388	0.207677	-7.91557	2.46132e-15	1.24701e-13	1.24701e-13	180.301	186.619	177.241	180.97	187.867	181.266	32.0603	26.5063	31.3478	67.5206	32.978	35.5389
NABP1	507.231	0.984706	0.124557	7.90567	2.66499e-15	1.34549e-13	1.34549e-13	355.096	265.71	295.902	350.63	305.977	347.068	718.592	797.839	707.565	636.622	658.589	647.183
BAIAP2	18.3623	0.114531	0.115497	0.991637	0.321374	0.555628	0.555628	1.37634	2.66599	63.8367	1.02824	0	12.8862	0	1.32531	9.85217	86.8121	35.8878	4.67618
BAIAP2-DT	6.18795	0.126403	0.186551	0.677579	0.498039	NA	1	4.12902	4.44332	17.2735	4.11296	2.37806	6.01355	1.10553	1.32531	3.58261	19.2916	8.72946	1.87047
KANK1	499.625	1.56435	0.198023	7.89986	2.79219e-15	1.40482e-13	1.40482e-13	227.096	249.714	262.857	35.9884	42.805	62.7127	1857.28	234.58	1057.77	201.356	1606.22	157.12
BAIAP2L2	35.7512	0.247114	0.254508	0.970949	0.331574	0.563116	0.563116	28.9032	33.7692	64.5878	23.6495	27.744	28.3496	23.216	21.205	31.3478	63.9034	53.3467	28.9923
BAIAP3	27.3875	0.18197	0.236154	0.770555	0.440971	0.663045	0.663045	19.2688	15.9959	49.5674	28.7907	19.8172	26.6314	8.84421	18.5544	15.2261	80.7835	33.9479	11.2228
BAK1	413.56	-0.071247	0.120914	-0.589239	0.555701	0.752253	0.752253	441.806	429.224	399.543	451.397	446.282	407.203	382.512	433.377	444.243	395.478	322.02	409.633
BAK1P1	3.42044	0.0390577	0.193064	0.202305	0.839679	NA	1	1.37634	4.44332	9.76327	3.08472	2.37806	2.57724	2.21105	2.65063	2.68696	6.02862	2.90982	0.935235
BAK1P2	0.724898	0.0434673	0.0676069	0.642942	0.520262	NA	1	0	0.888663	2.25306	0	0	0	0	0	0	3.61717	1.93988	0
BALR6	4.5249	0.0721082	0.212704	0.339008	0.734604	NA	1	2.75268	5.33198	3.7551	2.05648	5.5488	4.29539	8.84421	3.97594	3.58261	8.44007	2.90982	2.80571
BAMBI	22.7956	0.116639	0.253674	0.459799	0.64566	0.814549	0.814549	24.7741	13.3299	16.5225	22.6213	14.2683	30.9268	27.6381	25.181	23.287	18.0859	22.3086	34.6037
BANCR	0.172067	0.0047995	0.0580207	0.0827205	0.934074	NA	1	0	0	0	0	0	0.859079	0	0	0	1.20572	0	0
BANF1	2447.63	-0.067278	0.0768605	-0.875326	0.381396	0.612891	0.612891	2152.6	2514.92	2370.22	2469.83	2642.02	2687.2	2162.41	2389.54	2548.13	2589.9	2387.02	2457.8
BANF1P1	0.225647	0.0174606	0.0580207	0.300938	0.763461	NA	1	0	0	1.50204	0	0	0	0	0	0	1.20572	0	0
BANF1P2	9.45415	0.166278	0.247365	0.672197	0.501459	NA	1	13.7634	7.1093	6.00816	5.1412	9.51223	10.3089	9.94973	14.5784	8.95652	7.23435	8.72946	12.1581
BANF1P3	12.7501	-0.00936979	0.254306	-0.0368445	0.970609	NA	1	16.5161	20.4393	14.2694	10.2824	11.0976	11.168	11.0553	13.2531	11.6435	8.44007	14.5491	10.2876
BANF1P5	0.163062	0.0174606	0.0580207	0.300938	0.763461	NA	1	0	0	0.751021	0	0	0	0	0	0	1.20572	0	0
BANF2	0.550043	0.0148281	0.058526	0.253359	0.799991	NA	1	0	0.888663	4.50612	0	0	0	0	0	0	1.20572	0	0
ZFPM2	384.222	1.47938	0.187611	7.88538	3.13582e-15	1.57225e-13	1.57225e-13	368.86	311.921	322.939	53.4685	48.3538	48.1084	1107.74	218.677	775.635	122.984	1027.17	204.817
BANP	528.122	0.06107	0.101065	0.604263	0.545669	0.745919	0.745919	506.494	470.991	509.192	533.657	535.856	501.702	538.391	482.414	532.913	619.742	567.415	538.695
BAP1	2144.36	-0.13648	0.0627745	-2.17414	0.0296948	0.109097	0.109097	2176	2345.18	2027	2333.08	2299.58	2227.59	2036.38	2168.21	2061.79	2029.23	1991.29	2036.94
BARD1	1649.06	-0.168606	0.0991351	-1.70077	0.0889865	0.243011	0.243011	1695.65	1709.79	1480.26	1802.51	1785.92	1620.22	1863.92	1679.17	1547.69	1344.38	1671.21	1588.03
BARHL1	3.79914	0.0780969	0.120007	0.650769	0.515195	NA	1	0	0	8.26123	1.02824	0	5.15447	1.10553	0	1.7913	15.6744	11.6393	0.935235
BARHL2	1.58407	0.0510954	0.120853	0.422789	0.672449	NA	1	0	2.66599	7.51021	0	0	0.859079	0	0	2.68696	2.41145	1.93988	0.935235
IGHD3-9	47.9706	1.77196	0.224947	7.8772	3.3479e-15	1.67279e-13	1.67279e-13	17.8924	15.9959	15.7714	21.593	19.0245	14.6043	61.9095	96.7479	68.9652	104.898	47.5271	90.7178
BARX1-DT	1.40558	0.261091	0.116476	2.24158	0.0249883	NA	1	0	0.888663	1.50204	0	0	0	0	1.32531	0	8.44007	0.96994	3.74094
BARX2	3.17134	0.0817664	0.115048	0.710718	0.477259	NA	1	1.37634	7.1093	5.25714	0	0	4.29539	0	0	0	13.263	5.81964	0.935235
BASP1	854.193	-0.192797	0.154628	-1.24684	0.212455	0.433527	0.433527	674.407	830.9	853.159	1007.68	1059.03	1263.7	441.105	772.658	563.365	1079.12	686.717	1018.47
BASP1-AS1	7.41479	0.225889	0.154912	1.45818	0.144792	NA	1	1.37634	0.888663	18.0245	2.05648	0.792686	4.29539	2.21105	0	6.26956	38.5832	12.6092	1.87047
BASP1P1	3.16498	0.0882553	0.0902358	0.978052	0.328048	NA	1	0	0	8.26123	0	0	3.43631	0	0	0	20.4973	4.8497	0.935235
SCN5A	501.581	-0.86385	0.109859	-7.86329	3.74177e-15	1.86317e-13	1.86317e-13	695.053	632.728	610.58	722.853	639.698	687.263	302.914	355.184	278.548	384.626	356.938	352.584
BATF2	4.54935	0.195597	0.152733	1.28065	0.200318	NA	1	1.37634	1.77733	9.76327	2.05648	1.58537	0.859079	1.10553	0	1.7913	21.703	11.6393	0.935235
BATF3	178.429	-0.276888	0.183873	-1.50586	0.132102	0.317755	0.317755	176.172	185.731	153.208	206.676	255.245	235.388	103.919	194.821	170.174	191.71	96.0241	172.083
BAX	805.463	0.0201873	0.104701	0.192809	0.847109	0.927907	0.927907	759.741	803.351	780.31	836.988	884.638	773.171	813.667	905.189	826.687	762.018	654.709	865.093
BAZ1A	4431.6	0.0335521	0.0752431	0.445916	0.655658	0.820366	0.820366	4130.4	4365.11	4660.08	4256.91	4339.96	4869.26	4174.47	4645.22	4098.5	4226.06	4496.64	4916.53
BAZ1A-AS1	87.6911	-0.0662723	0.199882	-0.331558	0.740223	0.872516	0.872516	105.978	70.2044	84.1143	88.4287	84.0247	88.4851	113.869	99.3985	84.1913	77.1663	85.3547	71.0779
SNU13	2380.09	-0.472571	0.0602274	-7.84646	4.27957e-15	2.12366e-13	2.12366e-13	2522.83	2732.64	2762.25	2899.64	2908.36	3092.68	1681.5	2112.55	1842.36	2213.71	1730.37	2062.19
BAZ2A	4086.86	-0.0141665	0.0778167	-0.182049	0.855544	0.931876	0.931876	4248.77	4117.18	4302.6	4016.31	3966.6	3841.8	4031.85	4003.77	4010.73	3542.42	4804.11	4156.19
BAZ2B	603.138	-0.312829	0.184028	-1.6999	0.0891501	0.243249	0.243249	681.289	634.505	725.486	615.916	634.149	606.509	428.944	328.678	714.73	540.164	763.343	563.947
BAZ2B-AS1	67.6799	0.074267	0.228535	0.324969	0.745204	0.876462	0.876462	46.7956	67.5384	63.8367	51.412	57.8661	76.458	55.2763	68.9163	89.5652	78.3721	102.814	53.3084
BBC3	114.625	-0.0546971	0.176988	-0.309043	0.757289	0.88279	0.88279	121.118	138.631	124.669	128.53	118.11	106.526	110.553	115.302	110.165	124.19	78.5651	99.1349
BBIP1	286.088	0.107601	0.129669	0.829808	0.406647	0.636169	0.636169	257.376	260.378	286.89	276.597	302.806	249.992	289.648	276.99	314.374	347.249	294.862	275.894
BBLN	1013.19	-0.203169	0.127252	-1.59659	0.110357	0.280196	0.280196	981.332	1141.04	1186.61	859.609	1004.33	1181.23	910.953	791.212	1117.77	886.207	1158.11	939.911
BBOF1	17.0995	0.018053	0.254498	0.0709356	0.943449	0.974157	0.974157	23.3978	15.9959	30.0408	9.25416	13.4757	18.8997	14.3718	10.6025	17.913	16.8801	19.3988	14.9638
BBOX1	0.132114	-0.0205228	0.0580207	-0.353715	0.723552	NA	1	0	0	0	0	1.58537	0	0	0	0	0	0	0
BBOX1-AS1	2.72649	0.062876	0.141931	0.443004	0.657763	NA	1	1.37634	4.44332	10.5143	1.02824	3.17074	0	1.10553	0	0	7.23435	2.90982	0.935235
BBS1	13.4639	0.198292	0.25451	0.779111	0.435915	NA	1	6.88171	5.33198	10.5143	16.4518	11.8903	13.7453	13.2663	18.5544	15.2261	19.2916	13.5792	16.8342
BBS10	210.433	0.0771116	0.137251	0.561827	0.574234	0.765981	0.765981	194.064	172.401	190.008	204.62	217.989	176.111	250.954	194.821	233.765	202.562	253.154	234.744
BBS12	42.1257	0.0307842	0.234904	0.13105	0.895736	0.952958	0.952958	39.9139	47.9878	34.5469	54.4967	44.3904	32.645	50.8542	43.7353	33.1391	50.6404	32.008	41.1503
BBS2	121.525	-0.0491102	0.189662	-0.258936	0.795685	0.903328	0.903328	143.14	100.419	101.388	95.6263	130.001	118.553	168.04	99.3985	137.93	129.012	131.912	102.876
BBS4	164.902	0.290137	0.175959	1.64889	0.0991702	0.262239	0.262239	122.494	158.182	133.682	146.01	172.806	116.835	194.573	218.677	191.67	149.51	191.078	183.306
[truncated: 46,002 more rows]

## Sheet: Table S4
Supplementary Table S4. RNAseq analysis of SEM MSI2 KO vs SEM CNTR cells treated with Dexamethasone for 24h.
Gene	baseMean	log2FoldChange	lfcSE	stat	pvalue	padj	padj_NoNA	CNTRL_Dexa1_S2	CNTRL_Dexa2_S4	CNTRL_Dexa3_S6	CNTRL_untr1_S1	CNTRL_untr2_S3	CNTRL_untr3_S5	MSI2KO3-4_Dexa_S8	MSI2KO3-4_untr_S7	MSI2KO3-7_Dexa_S10	MSI2KO3-7_untr_S9	MSI2KO9-9_Dexa_S12	MSI2KO9-9_untr_S11
DAAM1	2539.04	-2.04537	0.0612679	-33.384	2.33938e-244	4.04104e-240	4.04104e-240	5685.67	5544.37	5376.56	2981.9	3065.32	2853	1258.09	343.256	1267.35	327.957	1417.08	347.907
PBX3	1779.41	1.89744	0.0653287	29.0446	1.80225e-185	1.5566e-181	1.5566e-181	766.622	807.795	703.706	835.959	889.394	821.279	2888.74	2547.25	2964.61	2663.44	2809.92	2654.2
EYA1	823.409	3.63712	0.130248	27.9245	1.34503e-171	7.74467e-168	7.74467e-168	105.978	100.419	110.4	100.768	110.183	119.412	1376.38	1316.04	1806.53	1600	1617.86	1516.95
ZNF518B	339.641	-5.21306	0.197891	-26.3431	6.1596e-153	2.66002e-149	2.66002e-149	670.278	660.277	543.739	730.051	730.857	722.485	0	0	4.47826	9.64579	3.87976	0
FAM30A	3128.12	-1.41939	0.0634173	-22.3817	5.93555e-111	2.05061e-107	2.05061e-107	4170.32	4104.73	3981.16	4750.47	4737.88	4680.26	1390.75	2090.02	1567.39	2131.72	1545.11	2387.66
MAP3K1	2208.65	1.69603	0.0761269	22.279	5.89997e-110	1.6986e-106	1.6986e-106	1255.22	1106.39	1064.2	992.252	944.089	902.892	3566.43	2936.89	4084.17	2879.27	3711.96	3060.09
LEF1	6969.29	-1.1015	0.0508123	-21.6778	3.32712e-104	8.21037e-101	8.21037e-101	8687.47	9056.37	8620.96	9835.12	10305.7	10061.5	4119.19	5026.91	4284.8	5038.72	3786.65	4808.04
TIMP2	195.573	-3.86994	0.196063	-19.7382	1.01281e-86	2.18692e-83	2.18692e-83	356.472	362.575	384.523	377.364	358.294	416.653	4.4221	10.6025	10.7478	25.3202	17.4589	22.4456
SLC12A7	1540.46	-1.46777	0.0748283	-19.6152	1.14653e-85	2.20057e-82	2.20057e-82	2170.49	2176.34	2045.03	2373.18	2254.4	2207.83	731.858	955.551	816.835	974.225	705.146	1074.59
MSI2	1754.06	-1.51147	0.0772256	-19.5722	2.67116e-85	4.61416e-82	4.61416e-82	2438.88	2210.11	2170.45	2826.63	2581.78	2588.4	700.903	1286.88	822.209	1279.27	800.2	1343
HSPA1A	336.158	2.57877	0.132846	19.4118	6.13714e-84	9.63754e-81	9.63754e-81	77.0751	72.8704	95.3796	92.5416	85.6101	105.667	604.723	609.644	531.122	578.748	581.964	598.551
GSDME	778.156	2.73723	0.143863	19.0266	1.0262e-80	1.47721e-77	1.47721e-77	301.419	324.362	281.633	55.525	41.2197	42.9539	2685.32	424.1	1900.57	329.163	2509.23	442.366
CDH11	123.696	-4.19928	0.222114	-18.906	1.01861e-79	1.35349e-76	1.35349e-76	273.892	283.484	269.616	232.382	214.818	190.715	0	0	0	10.8515	4.8497	3.74094
SHANK1	1927.21	-1.57307	0.0836781	-18.799	7.69235e-79	9.49127e-76	9.49127e-76	2551.74	2598.45	2726.96	2880.1	2905.99	3394.22	781.607	1219.29	901.922	1096	879.736	1190.55
MTUS1	1880.75	2.08575	0.114042	18.2893	1.00628e-74	1.15883e-71	1.15883e-71	1175.4	1269.9	1251.2	313.613	266.343	255.146	6266.12	469.161	5411.53	327.957	5225.07	337.62
SUCLG2	1202.28	1.34948	0.0740904	18.214	3.99525e-74	4.31337e-71	4.31337e-71	728.085	757.141	699.951	703.316	750.674	659.772	1844.02	1448.57	1885.35	1420.34	1949.58	1580.55
PCDHGA12	242.599	-2.86902	0.158614	-18.0881	3.95576e-73	4.01952e-70	4.01952e-70	432.171	460.327	419.82	444.2	455.794	408.062	45.3266	54.3378	49.2609	62.6977	43.6473	35.5389
PLXDC2	1100.87	1.69097	0.0936959	18.0474	8.27243e-73	7.93878e-70	7.93878e-70	425.29	449.664	446.857	581.984	522.38	500.843	1450.45	1862.06	1469.76	1779.65	1546.08	2175.36
SLFN13	372.051	-2.12326	0.118211	-17.9616	3.89139e-72	3.53788e-69	3.53788e-69	598.709	531.421	552.751	656.017	707.869	657.195	127.135	141.809	109.27	122.984	115.423	144.026
PDGFRB	1492.97	-1.49507	0.0860511	-17.3742	1.29429e-67	1.11788e-64	1.11788e-64	1864.94	1872.41	1701.06	2704.27	2626.17	2498.2	600.301	872.056	588.443	880.179	677.018	1030.63
APBB1IP	1535.72	1.62797	0.0937604	17.3631	1.56979e-67	1.29127e-64	1.29127e-64	568.429	676.273	624.849	786.604	867.199	882.274	2171.25	2913.04	2018.8	2447.62	1856.47	2615.85
ENSG00000288730	247.092	2.54679	0.149191	17.0707	2.45378e-65	1.92666e-62	1.92666e-62	46.7956	49.7651	45.8123	81.231	91.1589	79.0352	355.979	530.125	365.426	530.519	311.351	477.905
VAT1L	11491.1	-1.11992	0.0662561	-16.903	4.27878e-64	3.21355e-61	3.21355e-61	13852.9	14646.9	14111.7	14329.6	14681.3	14999.5	6234.06	10903.4	6092.22	9701.26	7014.61	11325.7
ARPP21	6252.93	0.821907	0.0489355	16.7957	2.62363e-63	1.88836e-60	1.88836e-60	4956.21	4860.99	4874.12	4544.82	4622.94	5016.16	8542.4	6663.67	8747.83	6406.01	8810.93	6989.01
NXN	478.219	-2.0231	0.120834	-16.7428	6.39448e-63	4.41833e-60	4.41833e-60	750.106	836.232	728.49	781.463	820.43	725.921	140.402	194.821	181.817	185.682	195.928	197.335
KHDRBS3	1180.57	1.45256	0.0873025	16.6383	3.68209e-62	2.44632e-59	2.44632e-59	996.471	1084.17	1024.39	297.161	332.928	308.409	2779.29	420.124	3055.96	530.519	2913.7	423.662
ICAM3	989.248	1.61604	0.0973978	16.5921	7.94651e-62	5.084e-59	5.084e-59	518.881	495.874	515.2	499.725	540.612	469.057	1660.5	1396.88	1802.05	1264.8	1434.54	1272.86
TFCP2	971.193	1.35083	0.081763	16.5213	2.57765e-61	1.59023e-58	1.59023e-58	517.504	552.748	469.388	619.001	635.734	606.509	1416.18	1403.51	1362.29	1391.41	1245.4	1434.65
CDK2AP1	1233.18	-1.27664	0.0777579	-16.4182	1.41733e-60	8.44241e-58	8.44241e-58	1640.6	1676.02	1680.78	1979.36	1753.42	1968.15	629.044	648.078	710.252	707.76	677.018	727.613
BAZ1B	7885.48	-0.866899	0.0528351	-16.4076	1.6871e-60	9.71431e-58	9.71431e-58	10204.2	10356.5	9745.24	10437.7	10052.1	10155.2	5572.96	6027.52	5371.23	5261.78	5562.61	5878.89
SDC2	2139.35	2.80865	0.17248	16.2839	1.28319e-59	7.15025e-57	7.15025e-57	546.408	470.991	464.131	149.095	152.196	161.507	6132.35	4242.33	3718.75	2419.89	3923.41	3291.09
PI4K2A	123.877	-3.75541	0.231436	-16.2266	3.27104e-59	1.76575e-56	1.76575e-56	246.365	219.5	250.09	251.919	233.05	264.596	0	0	2.68696	14.4687	2.90982	0.935235
TEX15	757.076	-1.64456	0.101888	-16.1408	1.3178e-58	6.8981e-56	6.8981e-56	974.45	926.876	967.314	1293.53	1210.43	1105.63	270.854	641.452	318.852	534.136	278.373	563.012
CHST15	1098.29	-1.64692	0.102225	-16.1108	2.14303e-58	1.08879e-55	1.08879e-55	1524.99	1571.16	1393.14	1726.42	1726.47	1585.86	423.416	677.235	516.791	787.338	418.044	828.618
MYO1F	1371.06	1.39947	0.0875364	15.9873	1.56652e-57	7.73145e-55	7.73145e-55	704.687	636.283	618.841	916.162	917.93	856.501	1937.99	2280.86	1751	1993.06	1629.5	2209.96
HNRNPLL	247.023	-2.50448	0.156984	-15.9538	2.68119e-57	1.28652e-54	1.28652e-54	392.257	335.026	343.967	474.019	502.563	425.244	49.7487	100.724	43.8869	109.721	54.3166	132.803
ARMCX6	99.9446	3.61846	0.228848	15.8116	2.58695e-56	1.20775e-53	1.20775e-53	0	0.888663	6.75918	2.05648	0.792686	1.71816	207.839	198.797	214.956	206.179	162.95	196.399
PARVB	420.972	2.53434	0.16224	15.6209	5.24725e-55	2.38529e-52	2.38529e-52	158.279	144.852	148.702	32.9037	28.5367	32.645	1286.83	508.92	947.6	455.764	969.94	336.685
EPHB4	655.613	-2.0282	0.129996	-15.602	7.05161e-55	3.12332e-52	3.12332e-52	1110.71	989.082	957.551	1093.02	1144.64	1014.57	222.211	280.966	206.896	242.351	242.485	362.871
LMO7	632.554	1.84315	0.118387	15.5689	1.18416e-54	5.11381e-52	5.11381e-52	269.763	275.486	265.11	299.218	247.318	322.154	1123.21	1052.3	990.591	859.681	1030.08	855.74
ENSG00000272405	755.657	1.45325	0.0945121	15.3763	2.36064e-53	9.77941e-51	9.77941e-51	523.01	559.858	541.486	315.67	276.647	320.436	1554.37	553.981	1571.87	688.469	1484.98	677.11
PAN3	38164.2	1.48329	0.0964689	15.3758	2.37777e-53	9.77941e-51	9.77941e-51	21404.9	19428	17867.5	21343.2	20524.2	17838.8	62895.6	62088.3	53521.5	49112.8	54352.5	57592.7
ZFP36L2	4246.19	0.924927	0.0608605	15.1975	3.67365e-52	1.47578e-49	1.47578e-49	4302.44	4393.55	4264.29	1854.95	1917.51	1990.49	8696.07	2494.24	7727.69	2289.67	8411.32	2612.11
AK5	751.721	1.56294	0.102889	15.1905	4.08933e-52	1.60543e-49	1.60543e-49	452.816	432.779	409.306	464.765	464.514	433.835	1281.3	736.874	1484.99	747.549	1232.79	879.121
PTPRB	196.527	-3.50821	0.231149	-15.1773	5.00279e-52	1.9204e-49	1.9204e-49	396.386	378.57	371.004	394.844	405.063	348.786	2.21105	5.30125	3.58261	14.4687	19.3988	18.7047
IGHD	423.943	1.56618	0.103729	15.0987	1.65044e-51	6.19775e-49	6.19775e-49	247.741	255.935	265.11	170.688	164.879	191.575	760.602	425.426	804.295	476.261	824.449	500.351
ARHGAP32	1316.58	-1.79359	0.118887	-15.0865	1.9883e-51	7.30764e-49	7.30764e-49	2122.32	2031.48	2089.34	2192.21	2055.43	2010.24	456.582	550.005	549.93	461.792	659.559	620.061
GCNT4	87.8884	-3.47166	0.230189	-15.0818	2.1339e-51	7.67936e-49	7.67936e-49	191.311	177.733	171.233	178.914	174.391	138.312	1.10553	0	1.7913	8.44007	5.81964	5.61141
CYSLTR1	251.458	2.2918	0.1551	14.7763	2.08299e-49	7.34318e-47	7.34318e-47	52.301	58.6518	60.0816	101.796	95.915	111.68	391.356	555.306	346.617	464.204	302.621	476.97
DTNA	342.052	1.83699	0.126433	14.5293	7.90036e-48	2.72941e-45	2.72941e-45	181.677	189.285	157.714	140.869	137.135	140.889	668.843	335.304	616.209	387.037	765.283	384.382
FRMD4B	502.898	-2.46783	0.170056	-14.5119	1.01918e-47	3.45201e-45	3.45201e-45	759.741	806.017	756.278	1034.41	1024.15	977.631	84.02	79.5188	99.4174	120.572	138.701	154.314
TANC2	721.432	1.52946	0.106278	14.3912	5.87648e-47	1.95212e-44	1.95212e-44	407.397	395.455	410.808	469.906	421.709	356.518	1182.91	878.683	1154.5	788.544	1345.31	845.453
TEAD1	157.739	-2.76221	0.192825	-14.325	1.52796e-46	4.97999e-44	4.97999e-44	247.741	254.158	283.886	311.557	329.757	280.06	29.8492	37.1088	17.913	49.4347	25.2184	26.1866
SLC9A7	317.109	2.22947	0.155694	14.3196	1.65186e-46	5.28412e-44	5.28412e-44	101.849	71.9817	90.1225	120.304	104.635	97.935	545.024	584.463	447.826	491.935	491.76	657.47
GNAI1	588.413	1.71956	0.121373	14.1675	1.45489e-45	4.5694e-43	4.5694e-43	295.913	363.463	313.176	303.331	268.721	281.778	1072.36	515.547	1142.85	573.925	1242.49	687.398
MEX3A	435.132	-1.73164	0.122426	-14.1443	2.02398e-45	6.24325e-43	6.24325e-43	606.967	605.18	696.947	699.203	713.417	847.051	179.095	189.52	186.296	162.773	165.86	169.278
CD37	1092.01	1.33761	0.0958404	13.9566	2.868e-44	8.69155e-42	8.69155e-42	523.01	585.629	542.988	761.926	809.332	802.379	1447.13	1602.3	1364.97	1380.55	1523.78	1760.11
JAML	206.407	3.14737	0.225854	13.9355	3.85734e-44	1.14882e-41	1.14882e-41	24.7741	23.1052	28.5388	31.8754	22.9879	24.9133	591.456	267.713	345.722	160.361	643.07	312.369
NRP1	455.064	1.43628	0.103119	13.9283	4.26272e-44	1.24804e-41	1.24804e-41	361.978	375.904	343.216	332.122	321.038	318.718	1028.14	103.374	942.226	122.984	1069.84	141.221
HUNK	798.654	-1.07068	0.077136	-13.8805	8.3215e-44	2.39576e-41	2.39576e-41	1563.52	1502.73	1465.24	700.232	668.234	657.195	741.808	330.003	703.982	273.699	676.048	301.146
QDPR	876.069	-1.16861	0.085553	-13.6595	1.77207e-42	5.01816e-40	5.01816e-40	1273.12	1253.01	1113.76	1255.48	1199.33	1255.97	554.974	519.523	523.956	495.553	499.519	568.623
BMF	3698.12	1.13811	0.0833804	13.6496	2.02958e-42	5.65468e-40	5.65468e-40	1713.55	1939.06	1930.12	2825.6	2885.38	2937.19	3932.36	5470.89	4220.31	5451.08	4433.6	6638.3
FZD8	729.574	1.24878	0.0919942	13.5746	5.66875e-42	1.55432e-39	1.55432e-39	719.827	749.143	649.633	154.236	145.062	149.48	1887.13	331.328	1617.55	341.22	1659.57	350.713
LPXN	430.45	1.77705	0.133466	13.3147	1.90241e-40	5.13471e-38	5.13471e-38	184.43	138.631	137.437	188.168	221.159	167.52	609.145	841.574	584.861	749.96	535.407	807.108
NRCAM	307.542	2.49095	0.188339	13.2259	6.22133e-40	1.65334e-37	1.65334e-37	82.5805	63.9837	74.351	130.587	122.074	128.003	753.969	563.258	548.139	365.334	461.691	396.54
KLHL6	671.727	1.23953	0.0937385	13.2233	6.44123e-40	1.68585e-37	1.68585e-37	393.634	472.769	422.825	371.195	419.331	383.149	1094.47	877.357	1019.25	777.692	1037.84	791.209
MYH10	1325.53	-1.22541	0.093203	-13.1478	1.75193e-39	4.51685e-37	4.51685e-37	1899.35	1815.54	1890.32	1992.73	1909.58	1840.15	834.672	744.826	651.139	700.526	841.908	785.598
CDT1	2642.26	-1.01729	0.0781077	-13.0242	8.90862e-39	2.26305e-36	2.26305e-36	3374.79	3644.41	3046.89	3555.65	3686.78	3456.07	1685.93	2113.87	1652.48	1843.55	1547.05	2099.6
CEACAM21	86.5533	-2.84991	0.221995	-12.8377	1.00788e-37	2.5232e-35	2.5232e-35	191.311	174.178	141.192	175.829	148.232	140.03	11.0553	14.5784	5.37391	12.0572	13.5792	11.2228
UHRF1	13277	-0.865614	0.0674818	-12.8274	1.15205e-37	2.84294e-35	2.84294e-35	14787.4	15573.8	14153	17345.4	17422.4	16728	8284.81	13825.7	7789.49	11540	8089.3	13784.4
ZNF318	1053.39	1.02945	0.0804086	12.8027	1.58331e-37	3.85212e-35	3.85212e-35	854.708	810.461	860.67	656.017	633.356	636.577	1776.58	984.708	1602.32	911.527	1871.01	1042.79
ETS1	995.128	1.30514	0.102233	12.7663	2.52792e-37	6.0649e-35	6.0649e-35	767.999	758.03	637.616	297.161	333.721	282.637	1922.51	1245.79	1835.19	1009.19	1781.78	1069.91
ADGRA2	332.196	-1.90069	0.149065	-12.7508	3.08707e-37	7.30495e-35	7.30495e-35	560.171	563.412	558.008	487.386	531.1	443.285	126.03	155.062	99.4174	142.275	166.83	153.379
DYNC1I2	1648	0.951364	0.0748586	12.7088	5.28253e-37	1.23311e-34	1.23311e-34	1096.94	1168.59	1245.94	1032.35	1208.05	1151.17	2266.33	1989.3	2441.55	1977.39	2198.85	1999.53
SNX9	1036.19	1.13954	0.0898579	12.6815	7.48433e-37	1.72379e-34	1.72379e-34	862.966	880.665	794.58	377.364	393.965	408.921	2132.56	1053.62	1741.15	979.048	1856.47	953.005
ZNF562	273.732	-2.51594	0.199729	-12.5967	2.2008e-36	5.0022e-34	5.0022e-34	509.246	496.763	431.086	516.177	493.051	491.393	56.3818	53.0125	35.8261	42.2003	70.8056	88.8473
XIST	9319.44	1.54755	0.123143	12.5671	3.20211e-36	7.18355e-34	7.18355e-34	5067.69	3951.88	5055.12	5398.26	4495.32	4739.54	12724.6	12772	13285.2	12182.6	18167.9	13993
ZFYVE16	959.553	1.00764	0.0802759	12.5522	3.8646e-36	8.5586e-34	8.5586e-34	637.246	676.273	618.09	637.509	640.49	585.892	1418.39	1304.11	1237.79	1202.11	1301.66	1255.09
POMC	87.7468	-3.10096	0.249394	-12.434	1.70937e-35	3.73768e-33	3.73768e-33	156.903	178.621	230.563	124.417	146.647	204.461	0	0	0	8.44007	2.90982	0
NELL2	183.553	-2.22649	0.179519	-12.4025	2.53259e-35	5.46849e-33	5.46849e-33	213.333	216.834	240.327	405.127	434.392	370.263	34.2713	96.7479	33.1391	61.4919	36.8577	59.8551
MZB1	903.898	1.22146	0.0988269	12.3596	4.32355e-35	9.22037e-33	9.22037e-33	531.268	572.299	536.98	490.471	542.99	579.019	1316.68	1265.67	1297.8	1042.95	1348.22	1322.42
ARID5B	1250.12	-1.15505	0.0941449	-12.2689	1.33129e-34	2.80447e-32	2.80447e-32	1754.84	1671.58	1768.65	1681.17	1700.31	1706.13	683.215	699.765	750.556	852.447	829.299	903.437
PLEK	373.21	1.71876	0.140549	12.2289	2.17856e-34	4.53403e-32	4.53403e-32	125.247	103.085	97.6327	196.394	175.184	177.829	362.613	815.068	474.696	796.984	357.908	795.885
TRO	233.275	2.02904	0.166916	12.1561	5.32586e-34	1.09522e-31	1.09522e-31	83.9568	68.4271	81.8612	88.4287	94.3296	85.9079	432.261	442.655	332.287	305.048	403.495	380.641
DAPP1	257.275	1.93596	0.15937	12.1476	5.9107e-34	1.20119e-31	1.20119e-31	108.731	105.751	93.8776	95.6263	86.4028	96.2168	530.652	441.329	467.53	332.78	387.976	340.426
RYBP	1859.32	1.46678	0.121298	12.0923	1.1597e-33	2.32937e-31	2.32937e-31	1190.54	1180.14	1159.58	1044.69	1082.02	1065.26	4107.03	1904.48	2793.54	1460.13	3505.36	1819.03
GNAQ	4794.29	0.781604	0.065197	11.9883	4.09051e-33	8.12177e-31	8.12177e-31	3932.21	3804.37	3696.52	4010.14	3912.7	3546.28	6760.29	5325.11	6746.95	4840.98	6317.22	4638.77
SRPK3	826.963	-1.3681	0.114196	-11.9803	4.50733e-33	8.76867e-31	8.76867e-31	1138.23	1196.14	1117.52	1175.28	1238.97	1230.2	341.608	475.787	495.296	517.256	426.774	570.493
KANK1	499.625	2.24358	0.187275	11.9801	4.51784e-33	8.76867e-31	8.76867e-31	227.096	249.714	262.857	35.9884	42.805	62.7127	1857.28	234.58	1057.77	201.356	1606.22	157.12
PAN3-AS1	1465.15	-1.09446	0.0916781	-11.9381	7.49536e-33	1.43861e-30	1.43861e-30	2233.8	2121.24	2128.39	2014.32	1918.3	2052.34	918.692	771.332	953.869	608.891	1083.42	777.18
ARID1B	9289.55	0.72402	0.0607193	11.924	8.86991e-33	1.68372e-30	1.68372e-30	8297.96	7996.19	8008.13	6593.08	6263.8	6136.4	13810.2	9628.4	12394.9	8651.07	14226.1	9468.32
PSTPIP1	104.439	2.31553	0.194587	11.8997	1.18794e-32	2.23049e-30	2.23049e-30	30.2795	27.5486	33.0449	13.3671	22.1952	23.1951	239.899	163.014	191.67	163.978	208.537	136.544
DNAJB12	2500.12	0.702982	0.0596051	11.794	4.19266e-32	7.78754e-30	7.78754e-30	2463.65	2417.16	2340.18	1573.21	1589.34	1524.86	4086.02	2243.76	4010.73	2020.79	3728.45	2003.27
NT5DC2	8137.73	0.827294	0.0703144	11.7656	5.86828e-32	1.07839e-29	1.07839e-29	8692.97	9482.03	9471.87	3461.06	3406.17	3832.35	15264	3231.11	16220.3	3119.21	18130.1	3341.6
CARMIL1	446.252	1.32566	0.112908	11.7411	7.84751e-32	1.42692e-29	1.42692e-29	264.258	272.82	286.89	320.811	314.696	322.154	702.009	451.932	649.348	442.501	824.449	503.157
RCC1L	708.227	1.16081	0.0988937	11.7379	8.14531e-32	1.46565e-29	1.46565e-29	417.032	466.548	411.559	388.675	444.697	413.217	1048.04	960.852	1060.45	1028.48	886.525	972.645
STC2	1472.24	-0.731683	0.0624344	-11.7192	1.01605e-31	1.80941e-29	1.80941e-29	1695.65	1737.34	1775.41	1763.43	1764.52	1713.86	1015.98	1263.02	1063.14	1414.31	1033.96	1426.23
SH3KBP1	2145.85	0.788238	0.0674251	11.6906	1.42402e-31	2.51006e-29	2.51006e-29	1308.9	1347.21	1322.55	1699.68	1533.85	1676.92	2232.06	3276.17	2493.5	3448.37	2215.34	3195.7
VAMP5	81.8291	-2.72018	0.23285	-11.6821	1.57296e-31	2.74457e-29	2.74457e-29	150.021	170.623	123.167	141.897	169.635	167.52	4.4221	13.2531	5.37391	16.8801	12.6092	6.54665
SH3BGRL	1451.85	0.767988	0.0657493	11.6805	1.60268e-31	2.76847e-29	2.76847e-29	960.686	1077.95	1034.16	1193.79	1275.43	1164.91	1836.28	1822.31	1766.23	1776.03	1695.46	1819.03
PLCH1	184.912	1.58706	0.135959	11.6731	1.75014e-31	2.99326e-29	2.99326e-29	137.634	121.747	126.171	65.8074	68.9637	75.5989	384.723	131.206	420.956	115.75	441.323	129.062
SNX10	444.799	1.76761	0.151734	11.6495	2.3092e-31	3.9107e-29	3.9107e-29	194.064	208.836	190.008	225.185	229.879	219.924	759.496	496.992	899.235	728.257	648.89	536.825
AFF3	386.417	2.11404	0.18183	11.6264	3.02511e-31	5.07338e-29	5.07338e-29	96.3439	105.751	144.947	116.191	122.866	115.976	816.984	739.525	495.296	530.519	660.529	692.074
TNFAIP2	323.949	1.43586	0.123586	11.6183	3.32607e-31	5.52448e-29	5.52448e-29	156.903	141.297	165.225	192.281	184.696	158.07	490.854	518.197	446.035	514.844	408.345	510.638
GPC6	457.51	1.27367	0.109741	11.6061	3.83603e-31	6.31082e-29	6.31082e-29	279.397	266.599	301.159	340.348	314.696	291.228	650.049	470.486	748.765	543.782	744.914	538.695
CRISPLD1	1096.97	0.738985	0.0636997	11.6011	4.06945e-31	6.63167e-29	6.63167e-29	1132.73	1170.37	1050.68	584.04	571.527	596.201	1903.72	829.646	1878.18	789.749	1850.65	806.173
RAC3	157.634	-1.85471	0.160474	-11.5577	6.74813e-31	1.08941e-28	1.08941e-28	246.365	224.832	212.539	287.907	290.916	277.482	51.9597	66.2657	60.0087	56.669	45.5872	71.0779
CD52	514.123	1.26132	0.110158	11.4501	2.34775e-30	3.7551e-28	3.7551e-28	396.386	394.566	424.327	167.603	161.708	217.347	1007.13	481.089	977.156	413.563	1057.23	471.359
GLIS2	201.497	-2.18925	0.192549	-11.3698	5.91218e-30	9.36945e-28	9.36945e-28	330.322	298.591	340.963	374.279	342.44	361.672	32.0603	70.2416	51.9478	95.2522	65.9559	54.2436
HPSE	167.288	-2.17526	0.191821	-11.3401	8.30932e-30	1.30486e-27	1.30486e-27	278.021	260.378	209.535	312.585	293.294	285.214	47.5376	82.1694	25.0783	69.932	43.6473	100.07
SLAMF1	458.204	1.09346	0.0967007	11.3076	1.2029e-29	1.87197e-27	1.87197e-27	293.161	311.032	286.89	272.484	298.05	299.818	604.723	604.343	675.322	608.891	676.048	567.688
CDK5R1	223.008	-1.65477	0.147168	-11.2441	2.47657e-29	3.81967e-27	3.81967e-27	353.72	327.028	283.135	377.364	406.648	337.618	86.231	98.0732	95.8348	110.927	87.2946	112.228
CAPG	1975.55	0.941845	0.0839453	11.2197	3.26203e-29	4.98657e-27	4.98657e-27	1479.57	1716.9	1550.11	1526.94	1521.16	1538.61	3393.96	1806.4	2772.94	1606.02	3134.85	1659.11
MEGF6	389.063	-1.94963	0.174633	-11.1641	6.10829e-29	9.25567e-27	9.25567e-27	516.128	449.664	481.404	766.039	790.308	767.157	67.4371	181.568	85.0869	194.122	142.581	227.262
BMP2K	1781.73	-0.729238	0.0659855	-11.0515	2.15611e-28	3.23866e-26	3.23866e-26	2546.23	2383.39	2443.82	2202.49	1949.21	2030	1468.14	1146.4	1387.36	1126.15	1551.9	1145.66
SENP6	2393.81	1.01929	0.0923112	11.0419	2.3981e-28	3.57111e-26	3.57111e-26	1724.56	1616.48	1410.42	1917.67	1701.9	1578.13	3584.12	3102.56	3209.12	2874.45	3065.01	2941.31
TNFRSF1B	1057.99	-0.904504	0.08258	-10.9531	6.42411e-28	9.48462e-26	9.48462e-26	1249.72	1222.8	1135.54	1405.6	1457.75	1403.73	688.743	1043.02	603.669	898.265	600.393	986.673
MMP11	305.987	-1.45751	0.133132	-10.9479	6.80188e-28	9.95726e-26	9.95726e-26	412.902	432.779	394.286	528.516	505.734	482.802	142.613	149.76	159.426	170.007	112.513	180.5
FUNDC1	42.0561	-2.69525	0.246374	-10.9397	7.44649e-28	1.08093e-25	1.08093e-25	85.3332	79.091	75.8531	85.3439	95.915	74.7398	0	0	0	3.61717	2.90982	1.87047
PAX5	26895.3	-0.652791	0.0597259	-10.9298	8.30503e-28	1.19551e-25	1.19551e-25	32309.6	33915.8	33054.7	31575.2	31369	30790.2	19645.2	21837.2	21172.3	20773.4	21925.5	24375
ID2	567.164	1.60295	0.146688	10.9276	8.50485e-28	1.21416e-25	1.21416e-25	311.053	354.577	223.053	289.964	287.745	233.669	1103.31	738.199	932.374	643.857	968.97	719.196
DST	1157.64	1.14352	0.104766	10.915	9.77234e-28	1.38367e-25	1.38367e-25	929.031	733.147	793.078	670.413	596.893	557.542	1899.29	1380.98	1664.12	1314.24	2043.66	1309.33
KDM1B	1081.83	1.05462	0.0968001	10.8948	1.2198e-27	1.71307e-25	1.71307e-25	747.354	807.795	716.474	763.983	847.381	818.702	1788.74	1277.6	1529.77	1052.6	1537.35	1094.23
PLIN2	835.108	-1.11629	0.102481	-10.8926	1.24992e-27	1.74122e-25	1.74122e-25	1164.39	1210.36	1008.62	1197.9	1313.48	1090.17	538.391	500.968	505.148	497.964	463.631	530.278
TMEM154	400.766	1.22663	0.112845	10.8701	1.60097e-27	2.21241e-25	2.21241e-25	254.623	263.933	242.58	207.705	234.635	200.165	677.687	539.402	596.504	465.41	589.723	536.825
IL2RB	174.596	-2.08084	0.191675	-10.8561	1.866e-27	2.55819e-25	2.55819e-25	231.225	255.935	226.057	365.025	363.843	336.759	46.4321	67.591	24.1826	77.1663	50.4369	50.5027
ZEB2	4030.03	-0.81036	0.0747259	-10.8444	2.11941e-27	2.88273e-25	2.88273e-25	5175.04	4979.18	4756.96	4945.84	4845.69	4824.59	2934.07	3501.48	2482.75	3224.11	2978.69	3711.95
MAP7D2	121.763	-2.1084	0.194489	-10.8407	2.2075e-27	2.97909e-25	2.97909e-25	209.204	192.84	181.747	216.959	247.318	190.715	28.7437	33.1328	29.5565	56.669	36.8577	37.4094
USP12	3741.49	0.821114	0.0758106	10.8311	2.45133e-27	3.2825e-25	3.2825e-25	3866.14	3973.21	3683	2089.38	2158.48	1969.01	7645.82	2308.7	6462.13	2020.79	6513.15	2208.09
ZNF664	3856.95	-0.540405	0.0500251	-10.8027	3.34348e-27	4.44272e-25	4.44272e-25	4518.53	4445.98	4544.43	4953.03	4508.01	4760.15	3085.52	3164.85	3188.52	2991.4	2978.69	3144.26
CARMIL2	637.326	1.04713	0.0970311	10.7917	3.7671e-27	4.96739e-25	4.96739e-25	436.3	464.771	437.094	375.308	407.441	428.68	977.285	796.513	1006.71	764.429	861.307	692.074
PTEN	3773.16	1.09506	0.10165	10.7729	4.62417e-27	6.05135e-25	6.05135e-25	2368.68	2176.34	2165.94	2538.73	2485.07	2387.38	5745.42	6130.9	4836.52	5166.53	4230.88	5045.59
PACSIN3	401.544	-1.28394	0.120423	-10.6619	1.53429e-26	1.99274e-24	1.99274e-24	502.365	554.526	554.253	565.532	571.527	620.255	212.261	262.412	240.035	282.139	172.649	280.571
DSTN	761.061	-0.814773	0.0766253	-10.6332	2.08778e-26	2.69137e-24	2.69137e-24	1194.66	1183.7	1150.56	823.62	806.954	774.03	658.893	372.413	693.235	424.415	626.581	423.662
RAB15	1262.27	-1.31946	0.124104	-10.6318	2.11909e-26	2.7115e-24	2.7115e-24	1732.81	1813.76	2079.58	1676.03	1662.26	2065.22	623.517	641.452	695.922	589.599	800.2	766.893
CLEC9A	433.147	1.5446	0.145351	10.6267	2.23874e-26	2.84353e-24	2.84353e-24	209.204	205.281	204.278	220.043	226.708	242.26	780.501	760.73	603.669	517.256	623.671	604.162
LPIN1	2481.68	0.977226	0.0920282	10.6188	2.43751e-26	3.07339e-24	3.07339e-24	1786.49	1655.58	1497.53	1890.93	1883.42	1718.16	3589.64	3451.12	3316.6	2822.6	3037.85	3130.23
RPP30	534.63	-1.13481	0.107413	-10.565	4.33032e-26	5.42043e-24	5.42043e-24	714.321	701.155	615.086	804.084	761.771	871.965	287.437	327.352	317.061	349.66	281.283	384.382
PRICKLE2	294.799	-1.62147	0.15372	-10.5482	5.17614e-26	6.43256e-24	6.43256e-24	301.419	293.259	307.167	549.08	565.978	498.266	68.5426	202.773	86.8782	285.757	96.0241	282.441
PLXNC1	1061.05	1.31055	0.124864	10.4958	9.02831e-26	1.11396e-23	1.11396e-23	620.73	544.75	570.025	735.192	682.503	615.1	1761.1	1728.21	1439.31	1281.68	1378.28	1375.73
LGALS9	647.304	1.52411	0.145808	10.4528	1.42237e-25	1.74255e-23	1.74255e-23	243.612	206.17	256.849	382.505	406.648	383.149	851.255	1428.69	816.835	1114.09	602.333	1075.52
SAMHD1	3168.15	-0.520306	0.0498477	-10.4379	1.66417e-25	2.02443e-23	2.02443e-23	3586.75	3891.46	3592.88	4153.06	4244.83	4054.85	2567.03	2292.79	2625.16	2207.68	2502.45	2298.81
POLR1F	2227.73	-0.655501	0.062856	-10.4286	1.83533e-25	2.21703e-23	2.21703e-23	2598.53	2591.34	2468.6	2861.59	2918.67	2818.64	1708.04	2017.13	1596.05	1779.65	1522.81	1851.77
KIRREL1	354.306	-1.6441	0.158068	-10.4012	2.44802e-25	2.93661e-23	2.93661e-23	546.408	508.315	482.906	535.713	562.807	473.352	143.718	192.17	119.122	223.059	162.95	301.146
NRGN	323.48	-2.0078	0.193709	-10.365	3.57621e-25	4.26037e-23	4.26037e-23	426.666	533.198	482.906	625.17	535.063	652.041	59.6984	95.4225	84.1913	107.309	117.363	162.731
IRF4	1712.78	-0.809049	0.0783533	-10.3257	5.39496e-25	6.38305e-23	6.38305e-23	2381.07	2286.53	1989.45	2433.84	2320.19	2200.96	1235.98	1080.13	1317.5	1056.21	1186.24	1065.23
GLO1	1791.46	-0.819469	0.0794725	-10.3114	6.26132e-25	7.35769e-23	7.35769e-23	2134.71	2262.54	1996.21	2343.36	2524.7	2420.02	1168.54	1301.46	1289.74	1466.16	1108.64	1481.41
MYADM	1953.05	0.680985	0.0661202	10.2992	7.10543e-25	8.29318e-23	8.29318e-23	1553.89	1622.7	1523.82	1289.41	1453.79	1487.92	2457.58	2243.76	2564.25	2423.51	2574.22	2241.76
PRKAR2A	1167.68	-1.07076	0.104073	-10.2885	7.93647e-25	9.20097e-23	9.20097e-23	1792	1799.54	1658.25	1505.34	1464.09	1352.19	675.476	633.5	917.148	657.12	819.599	737.901
LRIG1	231.105	-1.71191	0.16653	-10.2799	8.67995e-25	9.99583e-23	9.99583e-23	298.666	335.026	315.429	408.211	413.782	355.659	93.9697	164.339	61.8	110.927	88.2645	127.192
TMSB15A	492.268	-1.155	0.112789	-10.2404	1.30737e-24	1.49559e-22	1.49559e-22	641.375	589.184	538.482	719.768	815.674	722.485	266.432	379.04	266.009	393.066	224.056	351.648
STX17	845.428	0.751802	0.0735435	10.2226	1.57149e-24	1.78592e-22	1.78592e-22	666.149	622.953	631.608	619.001	665.064	606.509	1134.27	1007.24	1094.49	1045.36	1035.9	1016.6
BAHCC1	1978.46	1.43291	0.140289	10.214	1.71583e-24	1.93721e-22	1.93721e-22	1145.12	1037.07	1051.43	1023.1	1074.88	935.537	2626.73	2583.04	4131.64	3026.37	2777.91	2328.74
ABI3	209.442	-1.53743	0.150801	-10.1951	2.08552e-24	2.3393e-22	2.3393e-22	279.397	271.042	274.874	321.839	311.526	351.363	106.13	145.784	71.6522	142.275	74.6854	162.731
GAB2	2176.46	-0.658412	0.0645899	-10.1937	2.11517e-24	2.35725e-22	2.35725e-22	2514.58	2669.54	2503.9	2723.81	2861.6	3018.8	1631.76	1562.54	1627.4	1645.81	1576.15	1781.62
CAST	1419.76	0.78517	0.07717	10.1746	2.57574e-24	2.85214e-22	2.85214e-22	1168.51	1157.93	1093.49	964.489	965.492	967.322	2205.52	1608.93	1830.71	1505.95	1932.12	1636.66
VCAN	446.894	2.4147	0.237501	10.1671	2.78071e-24	3.05949e-22	3.05949e-22	86.7095	72.8704	86.3674	73.0051	53.11	67.8672	1427.23	995.31	514.104	381.009	974.79	630.349
FAM169A	60.977	-2.41324	0.238285	-10.1275	4.17052e-24	4.55959e-22	4.55959e-22	108.731	116.415	97.6327	138.812	106.22	125.425	3.31658	3.97594	10.7478	10.8515	6.78958	2.80571
ELK3	784.599	0.872033	0.0863767	10.0957	5.77166e-24	6.27042e-22	6.27042e-22	704.687	716.262	704.457	406.155	497.807	442.425	1410.65	673.259	1255.7	631.799	1294.87	677.11
PHACTR1	709.426	-0.992106	0.0984663	-10.0756	7.08304e-24	7.64702e-22	7.64702e-22	733.59	718.04	741.257	1000.48	955.979	1046.36	391.356	797.839	346.617	659.531	333.659	788.403
BCAN-AS2	282.545	1.52209	0.151159	10.0694	7.54081e-24	8.09068e-22	8.09068e-22	161.032	201.727	209.535	98.7111	99.0858	126.285	527.336	200.122	606.356	241.145	702.237	216.975
MRTFA	1799.52	0.610184	0.0608117	10.034	1.08072e-23	1.15237e-21	1.15237e-21	1461.67	1564.05	1476.51	1401.49	1410.98	1319.54	2278.49	2131.1	2363.63	1901.43	2276.45	2008.89
CD59	402.577	-1.1695	0.116631	-10.0273	1.15596e-23	1.22503e-21	1.22503e-21	597.332	582.074	582.792	638.537	554.088	533.488	241.005	198.797	271.383	221.853	233.756	175.824
IL18BP	390.192	1.2472	0.124404	10.0254	1.17898e-23	1.24182e-21	1.24182e-21	221.591	228.386	217.045	209.761	217.196	252.569	531.758	597.716	511.417	503.993	636.281	554.594
DSG2	1708.11	0.949148	0.0947332	10.0192	1.25549e-23	1.31438e-21	1.31438e-21	1229.07	1203.25	1091.23	1137.23	1181.1	1044.64	2579.19	2438.58	2282.12	2028.03	2103.8	2179.1
ITGAE	528.776	-1.0615	0.10603	-10.0113	1.35904e-23	1.41422e-21	1.41422e-21	798.278	821.125	863.674	585.069	591.344	584.173	349.346	284.942	409.313	372.569	390.886	294.599
BMPR2	977.976	0.906729	0.0906183	10.006	1.43399e-23	1.48328e-21	1.48328e-21	806.536	678.05	687.935	711.542	627.015	608.228	1429.45	1198.08	1356.02	1198.49	1357.92	1076.46
MMP16	490.773	1.31035	0.130977	10.0044	1.45731e-23	1.49843e-21	1.49843e-21	280.774	211.502	214.792	353.715	330.55	314.423	697.587	869.405	597.4	721.023	575.174	722.937
MFSD6	589.479	1.04161	0.104158	10.0003	1.51958e-23	1.55321e-21	1.55321e-21	433.548	414.117	391.282	373.251	344.026	393.458	905.426	793.863	862.513	617.331	860.337	684.592
BCAN-AS1	180.184	1.47439	0.148348	9.93873	2.82416e-23	2.86968e-21	2.86968e-21	111.484	129.745	124.669	67.8639	72.1344	74.7398	402.411	123.254	360.052	167.596	361.788	166.472
EPS8	1607.85	1.01817	0.10251	9.93239	3.00942e-23	3.04004e-21	3.04004e-21	1942.02	2006.6	1719.84	356.799	325.001	270.61	4334.77	304.822	3706.21	305.048	3765.31	257.19
SEPTIN6	6919.19	-0.874539	0.0880667	-9.93041	3.06994e-23	3.08315e-21	3.08315e-21	7474.91	8274.34	8838.76	9254.16	9555.04	10913.7	4118.08	5363.54	4413.77	4613.1	4624.67	5586.16
SMAD9	643.156	-1.3439	0.135434	-9.92291	3.30978e-23	3.30481e-21	3.30481e-21	824.429	846.007	776.555	1005.62	1003.54	965.604	328.341	478.438	343.035	510.021	218.236	418.05
SNU13	2380.09	-0.602004	0.0607304	-9.91274	3.66457e-23	3.63804e-21	3.63804e-21	2522.83	2732.64	2762.25	2899.64	2908.36	3092.68	1681.5	2112.55	1842.36	2213.71	1730.37	2062.19
FGFBP2	184.406	-1.54515	0.155983	-9.90583	3.92681e-23	3.8761e-21	3.8761e-21	278.021	320.807	349.225	296.133	271.891	298.959	80.7034	41.0847	105.687	30.1431	102.814	37.4094
GPSM2	530.963	1.28595	0.130872	9.82597	8.7034e-23	8.54219e-21	8.54219e-21	295.913	313.698	296.653	294.077	291.708	270.61	919.798	797.839	648.452	652.297	801.17	789.339
NIPSNAP1	765.957	-1.05641	0.107695	-9.80926	1.02714e-22	1.00242e-20	1.00242e-20	990.966	1026.41	915.494	1078.62	1177.14	1052.37	399.095	539.402	535.6	523.284	420.954	532.149
PTGER4	797.491	-0.933033	0.0951711	-9.80374	1.08494e-22	1.05288e-20	1.05288e-20	1012.99	924.21	842.645	1214.35	1282.57	1177.8	438.894	524.824	504.252	598.039	470.421	578.911
LGALS3BP	2692.97	0.70561	0.0720609	9.79186	1.22028e-22	1.1776e-20	1.1776e-20	1640.6	1754.22	1867.04	2338.22	2544.52	2729.29	2789.24	3431.24	3022.83	3596.68	2872.96	3728.78
MSN	15960.1	0.40234	0.0412711	9.74871	1.86833e-22	1.79297e-20	1.79297e-20	13716.6	14871.8	14265.6	13112.1	13687.3	13774.5	18465.6	17610.8	19217.1	16693.3	19076.8	17029.7
SLC7A2	2894.47	0.972418	0.100048	9.71952	2.48953e-22	2.36698e-20	2.36698e-20	2308.12	2203.88	2046.53	2253.9	2187.81	1845.3	4616.68	3029.67	4202.4	2442.8	4407.41	3189.15
ITGAL	1753.81	1.59643	0.164253	9.71934	2.49386e-22	2.36698e-20	2.36698e-20	434.924	476.323	496.425	922.332	1030.49	1101.34	2028.64	4826.79	1296.01	2765.93	1671.21	3995.32
MFSD12	1732.24	-0.538131	0.0559678	-9.615	6.91066e-22	6.52321e-20	6.52321e-20	2253.07	2402.94	2337.93	1652.38	1724.88	1815.23	1625.12	1285.55	1617.55	1257.57	1557.72	1256.96
SYK	2600.15	0.876405	0.0911943	9.6103	7.23361e-22	6.79095e-20	6.79095e-20	1820.9	1843.98	1692.05	1880.65	1898.48	1703.55	3718.99	3815.58	3157.17	3060.13	3163.94	3446.34
MYO1G	475.065	1.28887	0.134959	9.55009	1.29582e-21	1.20995e-19	1.20995e-19	298.666	263.044	238.074	314.642	275.062	280.919	798.19	710.368	646.661	542.576	649.86	682.722
SORBS1	692.886	-1.19254	0.12552	-9.50078	2.0832e-21	1.93469e-19	1.93469e-19	967.568	1005.97	923.755	1024.13	1100.25	975.054	412.361	384.341	471.113	395.478	312.321	342.296
NCBP3	2138.59	-0.532075	0.0561091	-9.48287	2.47374e-21	2.2851e-19	2.2851e-19	2771.95	2689.09	2623.31	2428.7	2388.36	2285.15	1851.76	1669.89	1811.9	1536.09	1897.2	1709.61
KANK2	898.246	-1.50261	0.158659	-9.47068	2.78031e-21	2.55463e-19	2.55463e-19	1083.18	1177.48	1101.75	1561.9	1569.52	1586.72	315.075	506.27	292.878	426.826	431.623	725.743
DLX2	127.012	2.06979	0.218709	9.46366	2.97345e-21	2.71764e-19	2.71764e-19	16.5161	25.7712	25.5347	50.3838	45.1831	79.8943	165.829	213.375	163.904	224.265	184.289	329.203
HDGF	11376.7	-0.703469	0.0744204	-9.45264	3.30403e-21	3.00388e-19	3.00388e-19	12619.7	13983.1	14270.9	13995.4	14177.2	15871.5	7446.82	8625.14	8737.09	8833.14	8646.04	9314.01
NKD2	202.857	-2.14076	0.226848	-9.43701	3.83577e-21	3.46906e-19	3.46906e-19	368.86	462.993	474.645	229.298	265.55	371.981	63.015	18.5544	33.1391	43.4061	77.5952	25.2514
ZNF608	295.884	2.02124	0.214403	9.42729	4.20828e-21	3.78613e-19	3.78613e-19	79.8278	104.862	121.665	107.965	121.281	89.3442	758.391	376.389	377.965	258.025	754.613	400.281
EVI2B	1309.18	0.761339	0.0808902	9.41201	4.86719e-21	4.35625e-19	4.35625e-19	1019.87	1117.94	1034.91	854.468	835.491	935.537	1804.22	1524.11	1759.96	1339.56	1893.32	1590.84
RIOX2	757.579	0.942241	0.100116	9.41147	4.8924e-21	4.35625e-19	4.35625e-19	518.881	449.664	450.612	553.193	557.258	547.233	966.23	1168.93	987.009	971.814	838.998	1081.13
MRPL41	504.46	-0.9633	0.10249	-9.39894	5.51152e-21	4.88236e-19	4.88236e-19	646.881	663.831	601.567	683.78	714.21	719.049	281.909	343.256	334.078	337.603	332.689	394.669
ERG	2058.78	-0.592555	0.0630658	-9.39582	5.67761e-21	5.00383e-19	5.00383e-19	2569.63	2570.01	2573	2343.36	2271.84	2427.76	1668.24	1720.26	1656.96	1474.6	1756.56	1673.14
BEX4	545.901	0.979733	0.1045	9.37545	6.88786e-21	6.03964e-19	6.03964e-19	348.214	383.014	433.339	379.421	361.465	434.694	753.969	612.295	834.748	614.919	792.441	602.291
LGMN	696.259	-0.736549	0.078622	-9.36823	7.37591e-21	6.43492e-19	6.43492e-19	761.117	777.58	786.319	950.094	923.479	907.187	447.738	646.753	478.278	581.159	451.022	644.377
VASH2	337.88	-1.00699	0.107507	-9.36668	7.48469e-21	6.49701e-19	6.49701e-19	408.773	409.674	407.804	458.595	434.392	437.271	208.944	279.641	199.73	312.283	180.409	317.045
PAIP2	4038.64	-0.439682	0.0470168	-9.3516	8.63334e-21	7.45662e-19	7.45662e-19	4609.37	4653.04	4491.1	4739.16	4630.87	4827.16	3355.27	3628.71	3496.63	3429.08	3257.06	3346.27
SATB1	7359.43	0.824688	0.0884521	9.32355	1.12511e-20	9.66926e-19	9.66926e-19	5305.8	4992.51	4886.89	5407.52	5374.41	5242.1	10143.2	11263.8	9158.04	9297.34	8088.33	9153.15
GBP1	525	0.960344	0.103058	9.31846	1.18041e-20	1.00942e-18	1.00942e-18	312.43	320.807	292.147	409.24	390.002	402.908	687.637	825.67	595.609	769.252	573.235	721.066
PTPN14	730.689	-1.46552	0.157433	-9.30882	1.29262e-20	1.09993e-18	1.09993e-18	1066.66	1017.52	995.102	1363.45	1184.27	1072.99	242.11	304.822	388.713	448.529	352.088	332.009
HOMER1	1093.51	0.889558	0.0956152	9.30352	1.35874e-20	1.15054e-18	1.15054e-18	752.859	831.789	708.963	809.225	734.027	760.285	1570.95	1508.21	1388.26	1239.48	1391.86	1426.23
DPYSL3	1218.61	-1.53423	0.165151	-9.28987	1.54482e-20	1.30172e-18	1.30172e-18	1505.72	1688.46	1556.11	1985.53	1988.85	1859.05	336.08	674.584	491.713	831.95	582.934	1122.28
LINC02693	290.889	-1.17573	0.126583	-9.28825	1.56848e-20	1.31524e-18	1.31524e-18	378.494	421.226	411.559	389.703	357.501	392.599	176.884	222.653	152.261	227.882	178.469	181.436
IL6ST	1196.6	-1.14469	0.12329	-9.28457	1.62361e-20	1.35489e-18	1.35489e-18	2770.58	2563.79	2386.74	765.011	675.368	609.087	1164.12	429.401	886.695	390.655	1271.59	446.107
CD300A	195.527	1.51558	0.163344	9.27846	1.71951e-20	1.42802e-18	1.42802e-18	63.3117	61.3178	64.5878	101.796	103.049	127.144	187.939	402.895	214.061	346.043	231.816	442.366
ADGRL1	2078.44	-0.553139	0.0597037	-9.26474	1.95554e-20	1.61627e-18	1.61627e-18	2372.81	2432.27	2379.98	2536.67	2453.36	2526.55	1552.16	1757.37	1646.21	1688.01	1670.24	1925.65
ENSG00000278730	351.721	1.28402	0.138787	9.25172	2.20901e-20	1.81706e-18	1.81706e-18	173.419	211.502	205.78	230.326	185.489	242.26	521.808	422.775	577.696	513.639	464.601	471.359
TMEM65	2868.05	0.706322	0.0764736	9.23615	2.55517e-20	2.09185e-18	2.09185e-18	2696.25	2506.03	2301.13	2039	1891.35	1754.24	4132.46	2840.15	3926.54	2880.48	4307.5	3141.46
RBMS1	1190.72	0.687978	0.0745172	9.23248	2.64449e-20	2.15126e-18	2.15126e-18	1052.9	978.418	1015.38	863.722	909.211	855.642	1758.89	1309.41	1649.79	1179.2	1547.05	1169.04
FHOD1	2302.77	-0.592522	0.0641804	-9.23215	2.65265e-20	2.15126e-18	2.15126e-18	2943.99	2971.69	2726.96	2697.07	2860.01	2840.97	1878.29	1639.41	1993.72	1536.09	1815.73	1729.25
HSPA2	110.018	-1.92751	0.208856	-9.22888	2.73479e-20	2.20751e-18	2.20751e-18	180.301	186.619	177.241	180.97	187.867	181.266	32.0603	26.5063	31.3478	67.5206	32.978	35.5389
CLECL1P	1118.89	0.789784	0.0864633	9.13433	6.58124e-20	5.28764e-18	5.28764e-18	790.02	764.25	772.8	913.077	891.772	992.236	1290.15	1536.04	1375.72	1426.37	1421.93	1252.28
LPAR5	1478.23	0.601325	0.0660979	9.0975	9.24363e-20	7.39233e-18	7.39233e-18	1252.47	1208.58	1200.13	1320.26	1334.88	1291.2	1755.58	1529.41	2013.43	1555.38	1814.76	1462.71
TOX	432.349	1.13142	0.124447	9.09159	9.75979e-20	7.76915e-18	7.76915e-18	374.365	424.781	362.743	280.71	250.489	258.583	825.828	145.784	939.539	206.179	906.894	212.298
CD22	2014.21	0.922278	0.101465	9.08965	9.93629e-20	7.87337e-18	7.87337e-18	978.579	1031.74	1017.63	1914.58	1935.74	1956.12	2198.89	3480.27	1868.33	2620.04	1843.86	3324.76
ENSG00000241207	33.0026	-2.28114	0.251433	-9.07256	1.16257e-19	9.16997e-18	9.16997e-18	57.8063	68.4271	54.0735	57.5815	65.0003	84.1897	0	3.97594	0.895652	1.20572	1.93988	0.935235
LINC01215	106.003	1.66067	0.183119	9.06883	1.20305e-19	9.44613e-18	9.44613e-18	31.6559	46.2105	48.8163	57.5815	50.7319	47.2493	158.09	177.592	183.609	153.127	165.86	151.508
FCRLA	106.185	1.82934	0.201786	9.06577	1.23731e-19	9.6712e-18	9.6712e-18	34.4085	33.7692	39.0531	60.6662	61.0368	54.1219	223.316	184.219	163.009	133.835	147.431	139.35
DIPK1B	690.286	-0.786417	0.0867903	-9.06112	1.2912e-19	1.00469e-17	1.00469e-17	907.009	976.641	865.927	803.056	776.832	733.653	495.276	561.933	540.974	513.639	529.587	578.911
MRPL35	688.293	0.801735	0.0885178	9.05733	1.33683e-19	1.03553e-17	1.03553e-17	495.483	478.989	444.604	504.866	505.734	495.688	917.587	958.201	830.269	916.35	765.283	946.458
CTNNBL1	2225.03	0.850927	0.0940711	9.04558	1.48878e-19	1.14809e-17	1.14809e-17	1798.88	1939.95	1914.35	1639.02	1660.68	1662.32	2989.34	1659.29	3665.9	1966.54	3763.37	2040.68
AFF1	3898.38	0.817595	0.090566	9.02762	1.75451e-19	1.34699e-17	1.34699e-17	3089.89	2873.94	3092.7	2996.29	2779.16	2759.36	5581.8	4494.14	4704.86	3836.61	5982.59	4589.2
MEF2D	2482.45	-0.496405	0.0550627	-9.01526	1.96396e-19	1.50113e-17	1.50113e-17	2537.97	2562.02	2482.12	3069.3	3072.45	3123.61	1731.25	2593.64	1795.78	2351.16	1821.55	2648.59
TSPAN33	147.127	-1.49425	0.165987	-9.00222	2.21207e-19	1.68332e-17	1.68332e-17	240.86	230.164	182.498	212.846	234.635	213.051	70.7537	84.82	67.1739	75.9606	61.1062	91.6531
TLE4	833.04	-0.749699	0.0833073	-8.9992	2.27371e-19	1.72263e-17	1.72263e-17	913.891	949.981	887.706	1095.08	1117.69	1163.19	515.175	809.766	537.391	768.046	557.715	680.851
SLC16A2	355.045	-1.5811	0.175848	-8.99128	2.44368e-19	1.84332e-17	1.84332e-17	679.913	765.139	746.514	432.889	398.721	377.135	288.542	70.2416	145.991	78.3721	190.108	86.9769
FKBP5	22341.9	0.546468	0.0608621	8.97879	2.7377e-19	2.05613e-17	2.05613e-17	30747.5	31839.9	30654.4	7193.57	7032.71	7209.39	48519.3	5747.88	41054	5531.86	47359.3	5213
SCN5A	501.581	-0.991083	0.110415	-8.97599	2.80822e-19	2.09996e-17	2.09996e-17	695.053	632.728	610.58	722.853	639.698	687.263	302.914	355.184	278.548	384.626	356.938	352.584
CHN1	126.998	-1.59048	0.177349	-8.96809	3.01696e-19	2.24634e-17	2.24634e-17	192.688	195.506	190.759	203.592	198.172	194.152	69.6481	56.9885	39.4087	69.932	51.4068	61.7255
TBC1D1	5030.91	-0.504029	0.0562169	-8.96579	3.0807e-19	2.28395e-17	2.28395e-17	6855.56	7047.99	6438.5	5756.09	5773.92	5293.64	4699.59	2979.3	4734.42	2817.78	4843.88	3130.23
DSE	385.44	-0.985772	0.110063	-8.95641	3.35431e-19	2.47617e-17	2.47617e-17	507.87	470.991	436.343	636.481	602.441	547.233	234.371	242.532	230.183	237.528	222.116	257.19
AKT3	1268.25	0.774628	0.0865453	8.95054	3.53735e-19	2.60018e-17	2.60018e-17	951.052	921.544	898.221	991.224	894.15	868.528	1729.04	1749.41	1479.62	1486.66	1608.16	1641.34
MOB3B	486.704	0.822259	0.0920463	8.9331	4.14238e-19	3.03201e-17	3.03201e-17	461.074	433.668	443.853	300.246	334.513	304.114	747.336	398.919	815.043	364.129	842.878	394.669
NABP1	507.231	1.11624	0.125199	8.91572	4.84673e-19	3.53259e-17	3.53259e-17	355.096	265.71	295.902	350.63	305.977	347.068	718.592	797.839	707.565	636.622	658.589	647.183
TRIM8	1849.49	-0.553859	0.0621327	-8.91412	4.91703e-19	3.5651e-17	3.5651e-17	2134.71	2248.32	2013.49	2190.15	2332.08	2289.44	1379.7	1542.66	1495.74	1519.21	1451.03	1597.38
ENSG00000201592	491.545	-1.0054	0.112792	-8.91377	4.93261e-19	3.5651e-17	3.5651e-17	660.644	649.613	668.408	762.954	660.307	695.854	357.085	294.22	272.278	256.819	322.02	298.34
CD164	6622.54	0.960288	0.107789	8.90898	5.15059e-19	3.70714e-17	3.70714e-17	4847.48	4576.61	3918.83	5616.25	5554.35	4454.32	9435.66	8173.21	8469.29	6753.26	8912.78	8758.48
CFLAR	604.32	0.753989	0.0851487	8.85498	8.37008e-19	5.99937e-17	5.99937e-17	491.354	452.329	483.657	404.098	447.075	416.653	818.089	738.199	775.635	672.794	847.728	704.232
BACE1	288.035	-2.03601	0.230781	-8.82227	1.12166e-18	8.00642e-17	8.00642e-17	609.719	512.759	536.229	441.115	504.148	444.144	39.7989	27.8316	76.1304	81.9892	109.603	72.9483
FAM171A1	64.1767	-2.00829	0.227731	-8.81868	1.15821e-18	8.23331e-17	8.23331e-17	83.9568	85.3117	87.1184	136.756	132.379	145.184	12.1608	13.2531	8.06087	33.7603	10.6693	21.5104
PRUNE2	748.736	1.14031	0.129353	8.81547	1.19189e-18	8.42737e-17	8.42737e-17	474.838	433.668	450.612	508.979	558.051	513.729	1227.13	1098.68	1068.51	952.522	880.705	817.396
RHOB	565.913	-1.63111	0.185035	-8.81515	1.19527e-18	8.42737e-17	8.42737e-17	1036.39	967.754	793.078	914.106	895.735	856.501	214.472	140.483	319.748	272.494	196.898	183.306
CUL2	952.322	0.785685	0.0892203	8.80612	1.29553e-18	9.09716e-17	9.09716e-17	696.429	662.054	612.082	754.728	699.942	664.068	1230.45	1396.88	1150.02	1241.9	1069.84	1249.47
EHBP1L1	2361.98	-0.716682	0.0815932	-8.78359	1.58336e-18	1.10732e-16	1.10732e-16	2816	2990.35	2694.66	3087.81	3140.62	3136.5	1708.04	1817	1901.47	1701.28	1491.77	1858.31
PPP3CC	824.285	-0.968074	0.110236	-8.78183	1.60837e-18	1.12028e-16	1.12028e-16	1143.74	1104.61	1001.11	1091.99	1122.44	978.49	582.612	685.187	496.191	519.667	524.738	640.636
PLXNB1	1702.02	-0.68154	0.0776124	-8.78133	1.61554e-18	1.12076e-16	1.12076e-16	2312.25	2115.91	2099.1	2093.5	1998.36	1928.63	1365.32	1422.06	1388.26	1245.51	1264.8	1190.55
HERC5	284.915	-1.30212	0.148305	-8.78001	1.63461e-18	1.12945e-16	1.12945e-16	330.322	395.455	388.278	467.849	414.575	390.881	143.718	220.002	111.061	180.859	157.13	218.845
AEBP1	1815.27	-0.808541	0.0921289	-8.77619	1.6911e-18	1.16383e-16	1.16383e-16	2420.98	2388.73	2104.36	2261.1	2452.57	2372.77	1386.33	1349.17	1370.35	1212.96	1111.55	1352.35
ECSIT	552.868	-0.965008	0.110016	-8.77156	1.76207e-18	1.20786e-16	1.20786e-16	728.085	691.38	717.976	704.345	789.515	723.344	305.125	433.377	393.191	429.238	355.968	362.871
FBXW7	1387.6	0.687731	0.0784705	8.7642	1.88109e-18	1.28435e-16	1.28435e-16	1396.99	1404.98	1282.74	933.642	1032.87	937.255	2404.52	1015.19	2099.41	944.082	2147.45	1052.14
ACAP1	1901.04	0.558515	0.0638235	8.75093	2.11602e-18	1.43906e-16	1.43906e-16	1611.7	1654.69	1556.11	1642.1	1664.64	1723.31	2557.08	2010.5	2365.42	1880.93	2225.04	1920.97
MEF2A	4700.98	0.401906	0.046009	8.73537	2.42856e-18	1.64513e-16	1.64513e-16	5381.5	5092.04	5255.64	3316.07	3229.4	3057.46	7067.63	3437.86	6849.05	3286.8	6904.03	3534.25
PIK3AP1	5308.58	-0.764297	0.0875308	-8.73175	2.5076e-18	1.69204e-16	1.69204e-16	6383.47	6342.39	5822.66	6736	6802.83	6193.1	3904.72	4983.18	3231.51	4304.44	3603.33	5395.37
B2M	12416.3	0.46751	0.0536451	8.71486	2.9111e-18	1.95667e-16	1.95667e-16	10039	9943.25	9519.94	11845.3	11769.8	11321.8	14034.7	15042.3	13034.4	13437.8	13869.2	15138.7
ZNF618	633.862	-1.0107	0.116276	-8.69233	3.55095e-18	2.37749e-16	2.37749e-16	754.235	745.588	775.804	842.129	840.247	843.615	310.653	475.787	369.009	634.211	401.555	613.514
DENND1B	199.448	1.25027	0.143886	8.68928	3.64754e-18	2.43273e-16	2.43273e-16	105.978	101.308	118.661	123.389	111.769	109.962	320.603	310.123	255.261	278.522	272.553	285.247
SLC24A1	495.944	0.771356	0.0887952	8.68692	3.72413e-18	2.47425e-16	2.47425e-16	374.365	439	398.792	354.743	359.087	370.263	708.642	494.342	686.965	520.873	716.786	527.473
ANKRD33B	2086.68	1.04838	0.120899	8.6715	4.2645e-18	2.82241e-16	2.82241e-16	1725.93	1670.69	1678.53	978.885	973.418	832.447	4025.22	2229.18	3074.77	1668.72	3881.7	2300.68
NAB2	629.515	-1.03023	0.118905	-8.66435	4.54103e-18	2.99396e-16	2.99396e-16	754.235	764.25	661.649	955.235	1000.37	989.658	312.864	441.329	402.148	446.118	301.651	524.667
HCLS1	5726.58	0.526187	0.0607483	8.66176	4.64516e-18	3.05097e-16	3.05097e-16	4402.92	4872.54	4583.48	4636.34	4947.95	5248.11	6774.66	6805.48	6996.83	6547.08	6304.61	6599.02
SLC35A3	368.298	1.00258	0.115849	8.6542	4.96398e-18	3.24802e-16	3.24802e-16	236.731	239.939	223.053	266.314	207.684	204.461	496.381	544.704	487.235	536.547	474.301	502.221
SEMA6C	442.846	-1.00647	0.116359	-8.64968	5.16428e-18	3.36633e-16	3.36633e-16	553.289	566.078	500.18	654.989	668.234	643.45	268.643	310.123	220.33	292.991	284.192	351.648
CBX1	2631.63	-0.418471	0.048458	-8.63575	5.83437e-18	3.78883e-16	3.78883e-16	2715.52	2908.59	2823.84	3080.61	3266.66	3194.91	2093.87	2458.46	2124.49	2352.37	2092.16	2468.09
CBLB	694.698	-0.933704	0.108395	-8.61391	7.0612e-18	4.56836e-16	4.56836e-16	747.354	819.347	734.498	1312.03	1194.58	1194.12	381.406	418.799	366.322	324.34	418.044	425.532
PARP8	702.065	0.68665	0.0798462	8.59966	7.99497e-18	5.15318e-16	5.15318e-16	507.87	512.759	527.216	615.916	592.136	591.046	822.511	842.899	897.443	818.687	804.08	892.214
ENSG00000268027	54.1589	-2.14177	0.249858	-8.57192	1.0177e-17	6.53521e-16	6.53521e-16	111.484	100.419	104.392	96.6546	107.805	87.626	3.31658	2.65063	5.37391	3.61717	10.6693	15.899
UBE2J1	1839.09	0.577792	0.0675604	8.55223	1.20738e-17	7.72452e-16	7.72452e-16	1267.61	1368.54	1310.53	1544.42	1506.1	1545.48	2005.42	2608.22	1965.96	2290.88	1970.92	2685.06
MOB3A	2861.54	0.757037	0.0885828	8.54609	1.27324e-17	8.11588e-16	8.11588e-16	1904.86	2094.58	1964.67	2200.43	2141.04	2284.29	3725.62	4233.05	3102.54	3365.18	3432.62	3889.64
KATNAL1	1197.72	0.81945	0.0960453	8.53191	1.43951e-17	9.14196e-16	9.14196e-16	949.676	920.655	1007.87	818.479	823.601	902.892	1787.64	1229.89	1491.26	1196.08	1915.63	1328.97
KCTD17	207.169	-1.25332	0.147081	-8.52126	1.5782e-17	9.98605e-16	9.98605e-16	330.322	316.364	313.927	256.032	280.611	278.341	148.14	132.531	113.748	107.309	108.633	100.07
EPHA7	91.602	-1.92986	0.226966	-8.50285	1.84992e-17	1.16626e-15	1.16626e-15	155.527	127.967	129.176	172.744	199.757	190.715	17.6884	13.2531	17.913	36.1717	25.2184	13.0933
YWHAQ	9962.51	-0.406995	0.0478874	-8.499	1.91231e-17	1.20121e-15	1.20121e-15	10815.3	11213.2	10269.5	12141.5	11945	11958.4	8191.95	9250.69	8419.13	8946.47	7680.95	8718.26
SLCO4A1	633.325	-0.682329	0.0805279	-8.4732	2.38744e-17	1.49422e-15	1.49422e-15	770.751	789.133	725.486	770.152	751.466	714.753	452.16	551.33	485.443	552.222	465.571	571.429
SPART	2221.37	0.737499	0.0870821	8.46901	2.47485e-17	1.54334e-15	1.54334e-15	1363.95	1465.41	1369.86	1864.2	1777.2	1885.68	2145.83	2962.07	2660.98	3495.39	2307.49	3358.43
LRP10	3989.32	0.454095	0.0536645	8.46173	2.63445e-17	1.63696e-15	1.63696e-15	3411.95	3688.84	3299.23	3446.66	3659.83	3401.95	4691.85	4317.87	4871.45	4098.26	4733.31	4250.64
CTDSPL	264.803	-1.0512	0.124577	-8.43811	3.22499e-17	1.99672e-15	1.99672e-15	324.817	325.251	304.163	410.268	374.94	371.981	130.452	226.629	153.156	190.504	151.311	214.169
PLOD1	1580.52	-0.569839	0.0676023	-8.42929	3.47779e-17	2.14555e-15	2.14555e-15	1793.37	1917.73	1869.29	1918.7	2052.26	2013.68	1203.92	1233.87	1353.33	1188.84	1175.57	1245.73
RECK	973.684	0.63411	0.0753171	8.41921	3.79044e-17	2.33011e-15	2.33011e-15	1204.3	1159.71	1051.43	503.838	462.929	449.298	1789.85	502.294	1753.69	482.29	1792.45	532.149
CTBP2	3083.38	-0.436186	0.0518919	-8.40567	4.25437e-17	2.60603e-15	2.60603e-15	3425.71	3423.13	3315	3558.74	3623.37	3468.1	2426.63	2761.95	2592.91	2884.09	2461.71	3059.15
GPR153	446.109	-1.26676	0.150763	-8.40233	4.37721e-17	2.6718e-15	2.6718e-15	662.02	811.349	608.327	474.019	547.746	612.523	217.789	282.292	291.983	321.928	276.433	246.902
CCDC91	536.56	-0.895329	0.106588	-8.39994	4.46697e-17	2.71699e-15	2.71699e-15	732.214	743.811	665.404	708.458	711.039	678.672	364.824	326.027	418.269	370.157	331.719	388.123
PLEKHA5	481.075	1.00371	0.119612	8.39138	4.80453e-17	2.91205e-15	2.91205e-15	306.924	302.145	331.951	338.291	359.879	356.518	763.918	589.764	567.843	560.662	645.01	649.988
PIK3R1	3619.57	0.727227	0.0867584	8.38221	5.19446e-17	3.13738e-15	3.13738e-15	3738.14	3414.24	3698.78	2465.72	2187.81	2351.3	6305.92	2580.38	5301.36	2240.24	6630.51	2520.46
FAM171A2	187.533	-1.24425	0.148781	-8.36294	6.11756e-17	3.68205e-15	3.68205e-15	227.096	283.484	235.82	274.54	287.745	277.482	93.9697	110.001	103	139.864	90.2044	127.192
LINC02363	261.205	1.6138	0.193041	8.35989	6.27776e-17	3.76535e-15	3.76535e-15	97.7203	87.089	73.6	140.869	127.622	120.271	452.16	588.439	316.165	426.826	246.365	457.33
SIGLEC15	66.2375	2.00046	0.239583	8.34973	6.84181e-17	4.08946e-15	4.08946e-15	22.0215	31.9919	29.2898	14.3954	11.8903	12.8862	262.01	27.8316	112.852	30.1431	212.417	27.1218
NIPSNAP3B	229.991	-1.64751	0.197799	-8.3292	8.13888e-17	4.84797e-15	4.84797e-15	361.978	308.366	347.723	335.206	405.855	432.976	55.2763	70.2416	95.8348	124.19	95.0541	127.192
HSPH1	7769.79	-0.705765	0.0848086	-8.32185	8.65989e-17	5.14058e-15	5.14058e-15	9165.06	9023.48	7975.84	10315.3	10322.4	9107.95	4866.53	6614.64	5866.52	7305.48	5070.85	7603.46
ANGPTL2	243.266	-1.22195	0.146847	-8.32123	8.70565e-17	5.1429e-15	5.1429e-15	207.828	256.824	267.363	376.336	392.38	422.667	101.708	237.231	97.6261	211.002	87.2946	260.931
NCF1	590.039	1.3951	0.167664	8.32084	8.73419e-17	5.1429e-15	5.1429e-15	388.128	427.447	444.604	251.919	235.428	264.596	1431.66	498.318	903.713	326.751	1438.42	469.488
APOBEC3F	910.737	0.641423	0.0770887	8.32058	8.75311e-17	5.1429e-15	5.1429e-15	660.644	767.805	755.527	773.237	762.564	770.593	1128.74	1011.21	1222.56	965.785	1105.73	1004.44
GUCY1A2	213.377	1.79125	0.215413	8.31539	9.14473e-17	5.35478e-15	5.35478e-15	112.86	116.415	143.445	87.4004	107.805	75.5989	844.622	47.7113	485.443	60.2862	447.142	31.798
ZYX	3143.59	0.707894	0.0853597	8.29308	1.10356e-16	6.44016e-15	6.44016e-15	2353.54	2706.87	2597.03	2195.29	2313.85	2504.21	3722.31	3392.8	4360.03	3348.3	4616.91	3611.88
CRACR2A	917.72	-0.653132	0.0788002	-8.28845	1.14738e-16	6.65833e-15	6.65833e-15	1270.36	1148.15	1188.11	1009.73	966.284	989.658	767.235	742.175	693.235	687.263	805.05	745.382
BCL9	827.693	-0.635346	0.0766557	-8.28831	1.14865e-16	6.65833e-15	6.65833e-15	1019.87	982.861	962.808	998.421	966.284	1016.29	606.934	642.777	649.348	751.166	628.521	707.038
H3P16	366.705	0.889382	0.107593	8.26614	1.38368e-16	7.99386e-15	7.99386e-15	222.967	255.046	229.061	289.964	257.623	270.61	467.637	516.872	472.009	500.376	415.134	503.157
GDF11	1929.5	-0.959482	0.116135	-8.26179	1.43502e-16	8.26285e-15	8.26285e-15	2507.69	2485.59	2527.94	2679.59	2606.35	2846.99	954.069	1149.05	1375.72	1247.92	1387.01	1386.02
PCED1A	522.777	1.05113	0.12729	8.25778	1.4841e-16	8.51706e-15	8.51706e-15	364.731	333.249	360.49	342.404	323.416	366.827	834.672	652.054	862.513	623.359	611.062	598.551
IFNGR1	425.668	0.753212	0.0912944	8.25036	1.57915e-16	9.0325e-15	9.0325e-15	379.87	355.465	334.955	311.557	315.489	308.409	633.466	437.353	600.087	415.975	593.603	421.791
RGS4	35.1677	-2.06751	0.250725	-8.24614	1.63589e-16	9.32618e-15	9.32618e-15	39.9139	52.4311	45.8123	78.1463	98.2931	92.7805	0	1.32531	0	4.8229	1.93988	6.54665
PDGFRL	100.651	1.7725	0.215685	8.21801	2.06911e-16	1.17572e-14	1.17572e-14	64.6881	65.7611	72.098	8.22592	7.13417	11.168	277.487	13.2531	291.087	18.0859	341.419	37.4094
SMIM24	177.022	-1.21092	0.147454	-8.21217	2.17234e-16	1.23033e-14	1.23033e-14	271.139	330.583	312.425	197.422	210.854	229.374	137.085	72.8922	116.435	61.4919	113.483	71.0779
CSRP1	679.873	0.729781	0.0889113	8.20797	2.24958e-16	1.26991e-14	1.26991e-14	454.193	511.87	449.11	594.323	585.002	568.71	846.833	876.032	815.939	845.213	727.455	883.797
HMCES	921.271	-0.885884	0.108079	-8.19664	2.472e-16	1.39092e-14	1.39092e-14	1325.42	1347.21	1052.18	1233.89	1173.18	1121.96	648.944	616.271	620.687	554.633	682.838	678.046
CCNA1	112.497	1.95285	0.238846	8.17619	2.92952e-16	1.643e-14	1.643e-14	11.0107	15.1073	21.0286	21.593	14.2683	40.3767	141.507	257.111	137.93	196.533	148.401	345.102
LIMCH1	176.021	-1.45894	0.178566	-8.17033	3.07549e-16	1.71929e-14	1.71929e-14	187.182	184.842	210.286	345.489	347.196	326.45	44.221	113.977	81.5043	116.955	47.5271	106.617
BCL11B	193.694	-1.3869	0.169775	-8.16907	3.10785e-16	1.73177e-14	1.73177e-14	323.44	295.925	278.629	290.992	260.001	312.705	113.869	94.0972	71.6522	92.8408	113.483	76.6893
RDX	2826.81	0.44449	0.0545295	8.15136	3.5986e-16	1.99878e-14	1.99878e-14	2389.33	2552.24	2436.31	2362.9	2372.51	2390.82	3344.22	3117.14	3224.35	2961.26	3516.03	3254.62
PTK2B	8107.78	0.719384	0.0882775	8.14912	3.66575e-16	2.02956e-14	2.02956e-14	7415.73	7292.37	6907.14	6176.64	6635.57	6405.29	13255.3	7115.61	10240.9	6097.35	12659.7	7091.89
GPC1	160.824	-1.24007	0.152465	-8.13351	4.17022e-16	2.30148e-14	2.30148e-14	217.462	239.05	235.069	226.213	250.489	232.81	88.4421	75.5429	84.1913	106.104	94.0842	80.4302
SMARCB1	3986.06	-0.491051	0.0604401	-8.12459	4.48866e-16	2.46934e-14	2.46934e-14	4463.48	4558.84	4229	4913.96	5012.95	4907.06	3194.97	3728.11	3245.84	3324.18	2937.95	3316.34
CRACD	351.545	-0.959093	0.118076	-8.12267	4.56045e-16	2.50087e-14	2.50087e-14	440.429	465.659	383.772	476.075	474.026	453.593	222.211	287.593	225.704	291.785	187.198	310.498
SLC30A4	123.198	1.40384	0.172991	8.11511	4.85349e-16	2.64893e-14	2.64893e-14	70.1934	63.0951	68.3429	67.8639	63.4149	53.2629	221.105	185.544	183.609	148.304	212.417	141.221
SNX22	524.979	-1.17069	0.144264	-8.11492	4.86113e-16	2.64893e-14	2.64893e-14	734.966	685.159	714.221	707.429	791.101	761.144	315.075	436.028	317.956	309.871	242.485	284.312
SMARCA2	8106.47	0.57801	0.0712785	8.10917	5.09648e-16	2.76845e-14	2.76845e-14	7978.65	8014.85	8105.01	5877.42	5739.84	5902.73	13174.6	6871.75	10703	6017.77	12395.8	6496.14
CCNL2	2305.15	0.670467	0.0828372	8.09379	5.78381e-16	3.13196e-14	3.13196e-14	1979.18	1774.66	1685.29	1815.87	1746.29	1759.39	3200.5	2873.28	2861.61	2498.26	2694.49	2772.97
AREG	102.774	1.65515	0.20461	8.08928	6.00186e-16	3.23988e-14	3.23988e-14	94.9676	90.6436	66.0898	3.08472	4.75612	3.43631	331.658	10.6025	293.774	8.44007	323.96	1.87047
AFF2	65.0342	1.98194	0.246118	8.05281	8.09121e-16	4.35413e-14	4.35413e-14	9.63439	30.2145	26.2857	14.3954	17.4391	9.44986	159.196	42.41	145.991	53.0519	240.545	31.798
ST3GAL4	229.514	-1.02736	0.127637	-8.04909	8.34099e-16	4.4746e-14	4.4746e-14	293.161	296.813	269.616	303.331	286.952	321.295	126.03	180.243	131.661	197.739	140.641	206.687
SH2B1	2134.02	0.754144	0.0937164	8.04709	8.47874e-16	4.53442e-14	4.53442e-14	1778.23	1711.57	1585.4	1464.21	1582.99	1633.11	3158.49	2624.12	2842.8	2050.94	2715.83	2460.6
AKR1B1	5918.43	-0.44723	0.0558224	-8.01164	1.13185e-15	6.03443e-14	6.03443e-14	8827.86	9737.97	8800.46	4652.79	4765.63	4936.27	6955.97	3154.25	6338.53	2979.34	6710.04	3162.03
RNF122	253.404	-1.00574	0.125639	-8.00504	1.19429e-15	6.34776e-14	6.34776e-14	323.44	292.37	317.682	370.167	403.477	370.263	143.718	174.941	143.304	155.538	154.22	191.723
ITPR1	716.759	1.28874	0.161319	7.98873	1.36336e-15	7.22415e-14	7.22415e-14	472.085	445.22	492.669	535.713	482.746	412.358	1490.25	754.103	968.2	495.553	1393.8	658.406
ADGRL3	6066.55	0.618226	0.0774032	7.98708	1.38176e-15	7.29571e-14	7.29571e-14	5753.11	5404.85	5390.07	4668.21	4503.25	3987.84	8107.93	5388.72	8461.22	5633.14	9085.43	6414.78
ALG1	528.417	0.865736	0.108396	7.98676	1.38532e-15	7.29571e-14	7.29571e-14	367.483	364.352	341.714	373.251	382.867	378.854	752.863	713.018	694.13	710.172	567.415	694.88
MXRA8	171.129	-1.99592	0.250467	-7.96881	1.6021e-15	8.41173e-14	8.41173e-14	272.516	299.479	257.6	334.178	354.331	352.222	6.63316	14.5784	22.3913	71.1377	32.008	36.4742
UST	159.99	1.27573	0.160249	7.96089	1.70807e-15	8.94099e-14	8.94099e-14	99.0966	108.417	93.1265	88.4287	87.9881	86.7669	258.693	165.664	317.061	201.356	232.786	180.5
SLC43A2	1068.62	1.11968	0.140814	7.9515	1.84266e-15	9.61635e-14	9.61635e-14	575.311	574.076	497.176	667.328	723.722	696.713	1577.59	2108.57	1139.27	1491.48	1127.07	1645.08
LGALSL	50.6916	-1.88594	0.237229	-7.94986	1.86728e-15	9.69729e-14	9.69729e-14	104.602	106.64	129.176	60.6662	70.5491	65.29	22.1105	0	12.5391	10.8515	17.4589	8.41712
ABTB3	107.368	-1.59068	0.200093	-7.94972	1.8694e-15	9.69729e-14	9.69729e-14	136.258	133.299	161.469	203.592	192.623	217.347	27.6381	30.4822	35.8261	56.669	43.6473	49.5675
SYPL1	815.857	0.864129	0.10875	7.94602	1.92593e-15	9.96064e-14	9.96064e-14	554.666	541.196	528.718	658.074	616.71	526.615	1106.63	1223.26	1035.37	1063.45	904.954	1030.63
ECPAS	3839.07	0.461984	0.0581644	7.94272	1.9779e-15	1.01989e-13	1.01989e-13	3498.66	3390.25	3220.38	3116.6	3202.45	2978.43	4824.52	4239.68	4829.36	4312.88	4318.17	4137.48
SIRPA	768.651	0.912065	0.115265	7.91274	2.51777e-15	1.29338e-13	1.29338e-13	443.182	465.659	457.372	489.442	563.6	550.669	804.823	1163.62	838.33	1077.92	1026.2	1343
CENPV	1250.83	-1.02787	0.129905	-7.91247	2.52327e-15	1.29338e-13	1.29338e-13	1430.02	1584.49	1502.04	1742.87	1831.9	1908.87	700.903	996.635	861.617	1041.75	534.437	874.445
DDAH2	1026.1	-0.953886	0.120671	-7.90483	2.68291e-15	1.37114e-13	1.37114e-13	1408	1334.77	1258.71	1499.17	1568.73	1431.22	732.964	711.693	708.461	532.93	538.317	588.263
SSBP2	1755.21	0.678049	0.08595	7.88888	3.04922e-15	1.55375e-13	1.55375e-13	1370.84	1334.77	1239.18	1434.4	1387.99	1399.44	2224.32	2421.35	2237.34	2085.9	1933.09	1993.92
DDX19B	317.77	-0.981081	0.124437	-7.88413	3.1673e-15	1.60917e-13	1.60917e-13	433.548	381.236	432.588	441.115	412.989	431.257	182.412	222.653	231.974	212.207	186.228	245.032
TRHDE	2747.4	-0.646429	0.0820074	-7.88257	3.20724e-15	1.62469e-13	1.62469e-13	3256.42	3125.43	2925.98	4057.44	3648.73	3452.64	2051.86	2348.45	1875.5	1981	1943.76	2301.61
CCDC162P	111.585	1.83776	0.233665	7.86494	3.69286e-15	1.86522e-13	1.86522e-13	26.1505	24.8826	42.0572	28.7907	25.366	48.1084	166.934	200.122	159.426	143.481	274.493	199.205
ZFPM2	384.222	1.35934	0.173212	7.84786	4.23205e-15	2.13132e-13	2.13132e-13	368.86	311.921	322.939	53.4685	48.3538	48.1084	1107.74	218.677	775.635	122.984	1027.17	204.817
HDAC5	2653.63	-0.624331	0.0796707	-7.83639	4.63683e-15	2.32839e-13	2.32839e-13	3014.19	3160.09	2854.63	3416.84	3459.28	3202.64	2017.58	2461.11	2042.09	2114.84	1731.34	2368.95
ENSG00000256663	380.9	-0.870179	0.111049	-7.83599	4.65172e-15	2.32909e-13	2.32909e-13	472.085	467.437	443.102	472.991	499.392	461.325	247.638	357.835	220.33	303.842	263.824	361.001
NOL4L	1523.87	-0.611742	0.0781009	-7.83272	4.77443e-15	2.38363e-13	2.38363e-13	1804.38	1673.35	1740.87	2021.52	1856.47	2073.82	1041.41	1288.2	1088.22	1211.75	1245.4	1241.06
TBC1D16	981.101	-0.733748	0.0936911	-7.83156	4.81847e-15	2.39868e-13	2.39868e-13	1446.54	1493.84	1447.22	1021.04	1009.88	869.387	804.823	552.656	879.53	655.914	905.924	686.463
SPATA20	527.705	0.839775	0.107402	7.81901	5.32407e-15	2.64276e-13	2.64276e-13	415.655	384.791	420.572	362.969	430.429	374.558	770.552	571.21	800.713	604.068	675.078	521.861
FBL	3546.18	-0.47831	0.061251	-7.80901	5.76411e-15	2.85299e-13	2.85299e-13	3703.74	3972.32	3680	4418.35	4278.92	4354.67	2732.86	3427.26	2900.12	3261.48	2478.2	3346.27
RAB27A	579.249	0.626525	0.0803448	7.79796	6.29178e-15	3.10526e-13	3.10526e-13	433.548	439.888	425.078	469.906	492.258	446.721	685.426	738.199	686.069	740.315	655.679	737.901
KDM7A	464.236	-0.851614	0.109628	-7.76822	7.95937e-15	3.9171e-13	3.9171e-13	594.58	606.068	600.065	637.509	661.893	558.401	317.286	335.304	312.583	270.082	338.509	338.555
TNFSF15	37.928	1.94624	0.250661	7.76445	8.20024e-15	4.02418e-13	4.02418e-13	8.25805	7.1093	11.2653	1.02824	1.58537	2.57724	129.347	1.32531	68.0696	13.263	207.567	3.74094
SMIM4	413.273	0.806549	0.103897	7.76295	8.29741e-15	4.06033e-13	4.06033e-13	397.763	412.34	440.098	242.665	269.513	302.396	716.381	221.327	772.052	229.088	753.643	202.011
CDH2	1007.34	-0.656372	0.0846578	-7.75323	8.9581e-15	4.36041e-13	4.36041e-13	1324.04	1368.54	1276.73	1194.82	1186.65	1146.87	851.255	707.717	904.609	730.669	728.425	667.758
PROCR	200.035	1.11981	0.144432	7.75319	8.96113e-15	4.36041e-13	4.36041e-13	111.484	133.299	95.3796	105.909	120.488	123.707	258.693	316.75	268.696	290.58	268.673	306.757
LTBP3	319.889	-1.19156	0.153814	-7.74678	9.42545e-15	4.57346e-13	4.57346e-13	425.29	500.317	425.829	440.087	458.173	445.003	163.618	173.616	155.843	248.379	219.206	183.306
MS4A1	29.1556	1.96356	0.253564	7.74383	9.64665e-15	4.66768e-13	4.66768e-13	2.75268	1.77733	1.50204	2.05648	5.5488	5.15447	77.3868	67.591	45.6783	51.8461	44.6172	43.9561
ZSWIM6	971.949	-0.526354	0.068108	-7.72823	1.09054e-14	5.26202e-13	5.26202e-13	1271.74	1229.02	1185.11	1123.87	1082.81	1127.97	822.511	678.56	834.748	742.726	879.736	684.592
CDC42EP3	4062.28	0.53613	0.0695545	7.70805	1.27751e-14	6.147e-13	6.147e-13	2466.4	2564.68	2656.36	3734.57	3868.31	3978.39	3354.17	5875.11	3939.97	5945.43	3939.9	6424.13
GLUL	7132.82	-0.636274	0.0826153	-7.70165	1.34323e-14	6.44525e-13	6.44525e-13	11112.6	11354.4	10321.3	6222.91	6246.37	5998.09	7786.22	4812.21	6365.4	3989.74	6691.62	4693.01
PDE3B	1498.47	-0.762761	0.0991493	-7.69306	1.43662e-14	6.87428e-13	6.87428e-13	1745.2	1612.92	1435.95	2180.9	2041.17	1907.15	985.024	1521.46	966.409	1325.09	807.96	1452.42
RAB11FIP4	577.613	0.711195	0.0924549	7.69234	1.44469e-14	6.89379e-13	6.89379e-13	478.967	481.655	473.143	354.743	337.684	286.073	844.622	731.573	778.322	705.349	765.283	693.945
LONRF2	101.319	-1.75235	0.227955	-7.68728	1.50291e-14	7.15187e-13	7.15187e-13	155.527	117.304	164.474	189.196	206.891	182.125	13.2663	29.1569	25.0783	56.669	36.8577	39.2799
RHOH	208.517	1.26241	0.164552	7.6718	1.69593e-14	8.0482e-13	8.0482e-13	218.838	166.18	169.731	75.0615	110.183	109.103	484.22	58.3138	519.478	77.1663	457.812	56.1141
GOLM2	2438.03	0.372711	0.0486005	7.66886	1.73533e-14	8.21264e-13	8.21264e-13	2454.02	2429.6	2330.42	2058.54	2210.01	2048.9	3103.21	2156.28	3090.9	2094.34	3158.12	2122.05
PYGL	119.065	1.89249	0.247334	7.65156	1.98553e-14	9.37106e-13	9.37106e-13	15.1398	15.1073	17.2735	21.593	26.9513	19.7588	105.025	243.858	149.574	157.95	235.695	420.856
SPP1	114.311	1.81202	0.236888	7.64927	2.02121e-14	9.51346e-13	9.51346e-13	77.0751	85.3117	57.0776	6.16944	3.96343	5.15447	271.959	2.65063	359.156	14.4687	485.94	2.80571
ESYT1	4588.7	-0.499939	0.0655091	-7.6316	2.31866e-14	1.08838e-12	1.08838e-12	5399.39	5445.73	5200.07	5403.4	5626.49	5641.57	3796.38	3713.53	3943.56	3357.94	3536.4	4000
RFLNB	3181.85	-0.89967	0.117969	-7.62633	2.41535e-14	1.1307e-12	1.1307e-12	4303.82	4485.08	4186.19	3921.71	3847.7	3777.37	2624.52	2689.06	1908.63	1876.11	2167.82	2394.2
NQO1	944.52	0.68769	0.0901887	7.62501	2.44017e-14	1.13923e-12	1.13923e-12	959.31	942.872	875.69	435.974	390.794	398.612	1593.06	1048.32	1447.37	844.007	1497.59	900.632
MID1	80.4998	1.48963	0.195508	7.6193	2.55059e-14	1.18757e-12	1.18757e-12	34.4085	29.3259	37.551	31.8754	33.2928	32.645	122.713	143.134	103.896	122.984	134.822	139.35
MLC1	1860.45	-1.01599	0.133673	-7.60055	2.94882e-14	1.3693e-12	1.3693e-12	2846.27	2870.38	2417.54	2674.45	2721.29	2317.79	1232.66	853.502	1542.31	1039.33	1025.23	784.662
LRRK1	2184.52	1.29813	0.17122	7.58168	3.41115e-14	1.57974e-12	1.57974e-12	1190.54	1071.73	1246.69	1142.37	1058.24	1005.98	4077.18	4254.26	2517.68	2226.97	3275.49	3147.07
STAT5A	466.746	0.802508	0.105856	7.58113	3.42557e-14	1.58218e-12	1.58218e-12	395.01	391.012	347.723	304.359	285.367	243.978	666.632	506.27	699.504	529.313	655.679	576.105
TCF3	8645.18	-0.480174	0.0633747	-7.57675	3.54313e-14	1.63211e-12	1.63211e-12	9195.34	9779.74	9412.54	9945.14	9933.15	10168.1	7164.91	8972.37	6921.6	7889.05	6161.06	8199.21
ENC1	801.461	-0.825594	0.109128	-7.56536	3.86786e-14	1.77695e-12	1.77695e-12	1121.72	1061.95	979.331	1142.37	1133.54	1072.99	592.562	363.136	577.696	511.227	561.595	499.416
TAPT1	3481.22	0.774944	0.102538	7.55763	4.10489e-14	1.88085e-12	1.88085e-12	2935.74	2774.41	2347.69	2855.42	2741.9	2410.57	5295.47	4237.03	4508.71	3606.32	4303.62	3757.78
STIM1	1280.89	0.614466	0.0813256	7.55564	4.16815e-14	1.90478e-12	1.90478e-12	1176.77	1152.6	1116.02	920.275	948.845	944.986	1903.72	1322.66	1592.47	1156.29	1837.07	1299.04
HSH2D	397.602	1.29426	0.171305	7.55528	4.17964e-14	1.90499e-12	1.90499e-12	118.365	131.522	134.433	319.783	341.648	332.463	457.688	954.225	353.783	704.143	290.012	633.154
GINS3	1403.75	0.628188	0.0832246	7.54811	4.41625e-14	2.00753e-12	2.00753e-12	1361.2	1364.1	1421.68	949.066	973.418	1018.01	2328.24	1164.95	2120.9	951.316	2042.69	1149.4
FBXL4	743.698	0.692697	0.091844	7.54211	4.62426e-14	2.09657e-12	2.09657e-12	582.193	618.509	558.759	653.961	650.003	611.664	977.285	840.249	944.913	683.646	968.97	834.23
E2F2	2032.22	-0.433205	0.0574519	-7.54032	4.68829e-14	2.12004e-12	2.12004e-12	2206.28	2307.86	2159.18	2182.95	2154.52	2131.37	1598.59	1995.92	1701.74	2110.02	1619.8	2218.38
LINC00426	346.691	1.08827	0.144779	7.51677	5.6147e-14	2.53233e-12	2.53233e-12	217.462	192.84	183.249	292.02	256.038	242.26	516.281	544.704	426.33	394.272	413.194	481.646
RGS2	732.428	0.917057	0.122235	7.50238	6.26687e-14	2.81911e-12	2.81911e-12	386.752	415.006	366.498	715.655	749.881	688.122	686.532	971.455	917.148	1020.04	697.387	1174.66
RNF125	326.333	-1.02828	0.13754	-7.47626	7.64705e-14	3.43104e-12	3.43104e-12	483.096	422.115	398.041	506.922	512.868	447.58	226.633	178.917	205.104	163.978	167.8	202.946
UQCC2	128.262	-1.38455	0.185305	-7.47173	7.91481e-14	3.54198e-12	3.54198e-12	183.053	207.947	153.208	163.49	200.55	183.843	49.7487	75.5429	67.1739	96.4579	54.3166	103.811
RASA2	846.012	0.806445	0.108017	7.46589	8.27391e-14	3.69311e-12	3.69311e-12	942.794	972.197	895.216	290.992	353.538	285.214	1907.03	481.089	1477.83	434.061	1658.6	453.589
TADA3	1012.69	0.593129	0.0794837	7.46228	8.50406e-14	3.78606e-12	3.78606e-12	821.676	898.438	776.555	948.038	913.174	870.247	1201.71	1060.25	1344.37	998.34	1256.07	1063.36
DLX1	121.677	1.50394	0.201693	7.45654	8.88224e-14	3.94426e-12	3.94426e-12	31.6559	35.5465	45.8123	59.6379	45.9758	63.5718	116.08	227.954	166.591	224.265	149.371	293.664
PROS1	245.812	1.04238	0.140251	7.43224	1.06774e-13	4.72929e-12	4.72929e-12	151.398	163.514	147.951	168.631	192.623	145.184	363.718	336.63	304.522	290.58	351.118	333.879
DCTN4	1181.6	-0.588648	0.0792062	-7.43185	1.07093e-13	4.73125e-12	4.73125e-12	1611.7	1675.13	1535.84	1400.46	1331.71	1347.04	1146.43	748.802	977.156	642.651	1053.35	708.908
RN7SL471P	62.2399	-1.87996	0.253025	-7.42993	1.08658e-13	4.78817e-12	4.78817e-12	125.247	152.85	117.159	97.6828	125.244	109.103	0	0	0	2.41145	9.6994	7.48188
ABHD14B	927.401	0.777636	0.104744	7.42415	1.13505e-13	4.98901e-12	4.98901e-12	659.268	780.246	756.278	579.928	612.746	701.867	1171.86	954.225	1319.3	1085.15	1375.37	1132.57
MAP7D1	4579.99	-0.416871	0.0561946	-7.41834	1.18601e-13	5.19978e-12	5.19978e-12	5066.31	5518.6	4927.45	5129.89	5198.43	5191.41	3933.46	4268.83	3909.52	3865.55	3736.21	4214.17
CORO2B	727.527	0.65884	0.0888404	7.416	1.20708e-13	5.27874e-12	5.27874e-12	700.558	699.378	646.629	459.623	496.221	449.298	1196.18	703.741	1011.19	648.68	1067.9	650.924
PSMD10	464.002	0.678673	0.0915435	7.41367	1.22848e-13	5.35878e-12	5.35878e-12	341.333	333.249	314.678	418.494	411.404	402.908	512.964	560.607	555.304	614.919	535.407	566.753
IGFBP2	1437.49	-1.0167	0.137246	-7.40789	1.28326e-13	5.58362e-12	5.58362e-12	1767.22	1681.35	1360.1	2049.28	2112.51	1880.52	749.547	1423.39	915.356	1305.8	565.475	1439.33
ARHGAP25	682.53	0.779058	0.105347	7.39516	1.41243e-13	6.13025e-12	6.13025e-12	511.999	507.427	479.902	442.143	486.709	473.352	1003.82	959.527	801.609	807.835	833.178	882.862
PLCG1	1464.77	-0.548731	0.0742412	-7.39119	1.4552e-13	6.30002e-12	6.30002e-12	2550.36	2507.81	2391.25	1242.11	1170	1088.45	1782.11	495.667	1557.54	553.427	1712.91	525.602
FAM81A	550.811	-0.657276	0.0891742	-7.37071	1.69728e-13	7.3297e-12	7.3297e-12	496.859	515.425	488.914	711.542	709.454	667.504	299.598	681.211	332.287	686.057	302.621	718.261
PTK7	1369.42	-0.622088	0.0844249	-7.36854	1.72512e-13	7.43137e-12	7.43137e-12	1720.43	1761.33	1537.34	1760.35	1768.48	1580.7	1108.84	1041.7	1067.62	934.436	1041.72	1110.12
MPIG6B	69.1556	-1.81207	0.24608	-7.36372	1.78857e-13	7.68553e-12	7.68553e-12	132.129	105.751	124.669	101.796	103.842	151.198	17.6884	11.9278	5.37391	28.9374	20.3687	26.1866
TMEM97	1882.19	-0.555503	0.0756679	-7.34133	2.11487e-13	9.06506e-12	9.06506e-12	1964.04	2118.57	1897.08	2101.72	2245.68	2103.02	1355.37	2101.95	1403.49	1856.82	1272.56	2166
CCND3	3658.81	-0.53733	0.0732056	-7.34002	2.13567e-13	9.13156e-12	9.13156e-12	3490.4	3590.2	3137.01	4107.82	4335.2	4200.04	2335.98	4616.07	2459.46	4380.4	2182.36	5070.85
LINC00467	47.6444	1.72747	0.23547	7.33629	2.19603e-13	9.36646e-12	9.36646e-12	8.25805	15.9959	20.2776	10.2824	10.3049	7.73171	87.3365	91.4466	97.6261	78.3721	80.505	63.596
TGFBR2	1201.91	0.659879	0.0899676	7.33463	2.22339e-13	9.45983e-12	9.45983e-12	1157.5	1080.61	959.053	943.925	847.381	774.03	1700.3	1200.73	1771.6	1126.15	1641.14	1220.48
ERO1A	2876.28	0.435131	0.0593348	7.33348	2.24249e-13	9.50843e-12	9.50843e-12	2393.46	2414.5	2227.53	2558.26	2559.58	2472.43	3143.01	3557.14	3381.98	3302.48	3016.51	3488.43
MPPED2	238.812	-0.984109	0.134198	-7.33328	2.24583e-13	9.50843e-12	9.50843e-12	350.967	326.139	328.947	339.319	267.928	322.154	174.673	159.038	146.887	144.687	160.04	144.961
ATP2B1	2470.29	0.49674	0.0677535	7.33159	2.27445e-13	9.60608e-12	9.60608e-12	1925.5	1981.72	1939.89	2341.3	2255.19	1970.73	2738.39	2816.29	2813.24	3020.34	2752.69	3088.15
RNU2-63P	20.5579	-1.85019	0.252587	-7.32499	2.38912e-13	1.00658e-11	1.00658e-11	56.43	35.5465	45.8123	24.6778	38.0489	40.3767	0	0	1.7913	1.20572	0	2.80571
BANK1	435.863	1.64907	0.22524	7.32138	2.45439e-13	1.03156e-11	1.03156e-11	93.5912	77.3137	102.139	227.241	192.623	201.883	720.803	1399.53	313.478	711.377	360.818	829.554
C14orf132	503.297	-0.846592	0.115692	-7.31763	2.52391e-13	1.0582e-11	1.0582e-11	766.622	764.25	717.225	629.283	619.088	575.583	462.11	255.785	341.243	273.699	408.345	226.327
ZBTB25	524.302	0.663981	0.0908171	7.3112	2.64773e-13	1.10743e-11	1.10743e-11	355.096	410.562	401.796	403.07	398.721	419.23	651.155	687.838	594.713	642.651	645.01	681.786
ULK1	2079.33	-0.563392	0.0771375	-7.30374	2.79879e-13	1.16779e-11	1.16779e-11	3292.21	3082.77	2784.78	1882.71	1983.3	1869.35	2244.22	1327.96	1974.91	1286.51	1918.54	1304.65
TLR6	233.766	1.35878	0.186303	7.29342	3.02194e-13	1.25786e-11	1.25786e-11	115.613	89.755	84.8653	155.264	128.415	130.58	287.437	436.028	367.217	458.175	236.665	315.174
CCDC88B	1718.56	0.767154	0.105192	7.29287	3.03426e-13	1.25995e-11	1.25995e-11	1406.62	1377.43	1369.11	1124.89	1216.77	1207.86	2834.57	2079.42	2180.91	1651.84	2230.86	1942.48
AGPAT3	154.426	-1.81499	0.248922	-7.2914	3.06744e-13	1.27067e-11	1.27067e-11	246.365	293.259	283.135	249.862	250.489	259.442	37.5879	41.0847	30.4522	115.75	22.3086	23.3809
PITPNM2	449.882	-0.943236	0.129493	-7.28408	3.23881e-13	1.33845e-11	1.33845e-11	499.612	614.066	579.037	606.662	629.393	613.382	232.16	291.569	311.687	360.512	293.892	366.612
SUSD4	205.095	-1.0645	0.146294	-7.27647	3.42678e-13	1.41275e-11	1.41275e-11	283.526	286.15	257.6	299.218	263.964	243.978	114.975	165.664	138.826	159.156	111.543	136.544
TSPOAP1-AS1	343.729	0.839104	0.115674	7.25401	4.04601e-13	1.66407e-11	1.66407e-11	236.731	247.937	244.833	247.806	262.379	260.301	494.17	466.51	451.409	417.181	407.375	388.123
ZNF561-AS1	306.748	0.954593	0.131658	7.25057	4.15013e-13	1.70284e-11	1.70284e-11	253.247	191.951	185.502	211.817	227.501	205.32	424.522	414.823	431.704	376.186	416.104	342.296
CNTNAP1	168.871	1.04771	0.144561	7.24753	4.24449e-13	1.73742e-11	1.73742e-11	107.355	130.633	115.657	87.4004	87.1955	99.6531	265.326	180.243	257.052	208.59	263.824	223.521
NINJ1	155.867	-1.42645	0.197003	-7.24079	4.46088e-13	1.82168e-11	1.82168e-11	236.731	242.605	226.808	214.902	231.464	235.388	40.9045	78.1935	72.5478	89.2236	94.0842	107.552
H6PD	760.227	0.639627	0.0883635	7.23858	4.53401e-13	1.84718e-11	1.84718e-11	652.386	656.722	615.086	686.865	640.49	632.282	1085.63	735.549	934.165	677.617	1019.41	786.533
BTBD3	806.47	0.525418	0.0725928	7.23788	4.55754e-13	1.8524e-11	1.8524e-11	725.332	730.481	724.735	686.865	690.43	638.295	1118.79	776.634	1004.03	775.281	1042.69	764.087
SLC46A3	306.02	0.853943	0.118055	7.2334	4.71034e-13	1.91001e-11	1.91001e-11	232.602	238.162	228.31	197.422	205.306	195.011	406.834	312.774	472.904	368.952	426.774	387.187
CCDC86	1567.24	-0.647658	0.0895571	-7.23179	4.7668e-13	1.92838e-11	1.92838e-11	1542.88	1722.23	1843.76	1945.43	1937.32	2135.67	945.225	1504.23	1146.43	1524.04	1123.19	1436.52
SPIDR	1193.44	0.58723	0.081241	7.22825	4.89243e-13	1.97457e-11	1.97457e-11	940.041	947.315	886.204	1051.89	1053.48	978.49	1448.24	1465.8	1509.17	1369.7	1251.22	1419.69
WASF3	351.277	-0.969872	0.134195	-7.22736	4.92478e-13	1.983e-11	1.983e-11	399.139	432.779	436.343	504.866	523.965	535.206	252.06	278.316	196.148	248.379	166.83	241.291
SPTBN2	1362.39	-0.907535	0.125959	-7.20499	5.80488e-13	2.33194e-11	2.33194e-11	1727.31	1888.41	1700.31	1855.97	1813.67	1670.91	965.124	1024.47	1011.19	1140.62	735.214	815.525
EFCAB14	1687.58	0.349898	0.0485923	7.20069	5.99075e-13	2.40102e-11	2.40102e-11	1562.15	1552.49	1550.86	1446.73	1473.6	1429.51	1999.9	1758.69	1974.91	1714.54	1983.53	1804.07
ADCY7	1377.45	0.729468	0.101518	7.18561	6.69097e-13	2.67546e-11	2.67546e-11	1012.99	1001.52	947.788	1020.01	1109.76	987.94	1886.03	2030.38	1591.57	1595.17	1542.2	1804.07
PRSS57	331.423	-1.18016	0.164313	-7.18237	6.85109e-13	2.73316e-11	2.73316e-11	330.322	345.69	283.886	500.753	560.429	533.488	149.246	332.654	89.5652	307.46	136.762	406.827
ALDH1A3-AS1	340.789	1.57119	0.219361	7.16258	7.91701e-13	3.15112e-11	3.15112e-11	105.978	101.308	158.465	119.276	133.171	139.171	713.064	813.742	388.713	377.392	474.301	564.882
PANK3	4245.83	0.782122	0.109345	7.15278	8.50392e-13	3.37694e-11	3.37694e-11	4398.79	3836.36	3733.32	2974.7	2773.61	2353.88	8203	3509.43	6170.15	3009.49	6766.3	3220.95
IFFO2	233.84	-0.83703	0.117169	-7.14378	9.07976e-13	3.59733e-11	3.59733e-11	319.311	335.026	332.702	256.032	279.025	280.919	184.623	149.76	177.339	153.127	173.619	164.601
RAB11FIP3	1094.53	-0.535029	0.0749016	-7.14309	9.1253e-13	3.6071e-11	3.6071e-11	1347.44	1448.52	1266.97	1210.24	1280.98	1330.71	901.004	830.971	953.869	787.338	923.383	852.935
SLC23A2	2034.49	0.423983	0.0594343	7.13364	9.77516e-13	3.85516e-11	3.85516e-11	1713.55	1652.91	1623.71	1953.66	1856.47	1810.94	2284.02	2396.17	2308.99	2255.91	2121.26	2436.29
FGD2	480.121	1.14267	0.160349	7.12613	1.03229e-12	4.06191e-11	4.06191e-11	450.064	405.23	373.257	211.817	197.379	158.93	1233.77	336.63	729.061	325.546	1007.77	332.009
SMIM30	356.203	0.847487	0.118987	7.12251	1.05982e-12	4.16074e-11	4.16074e-11	231.225	229.275	229.812	289.964	300.428	265.455	438.894	534.101	454.991	422.003	394.766	483.517
USP15	1250.13	0.46766	0.0656706	7.1213	1.06911e-12	4.18772e-11	4.18772e-11	1069.42	1032.63	1049.93	1103.3	1034.46	1034.33	1552.16	1473.75	1447.37	1390.2	1383.13	1430.91
ACBD7	93.2492	-1.46885	0.206273	-7.12089	1.07235e-12	4.19088e-11	4.19088e-11	137.634	144.852	157.714	141.897	166.464	134.875	54.1708	45.0606	31.3478	40.9946	36.8577	27.1218
CLIC4	5684.05	-0.605493	0.0850518	-7.11911	1.08625e-12	4.23565e-11	4.23565e-11	7443.26	7073.76	6453.52	7035.22	6808.38	5936.23	5003.61	4891.73	4471.99	4420.18	4134.85	4535.89
CA5B	272.282	-1.01064	0.142003	-7.11701	1.10296e-12	4.29113e-11	4.29113e-11	352.343	343.913	338.71	419.522	455.794	421.808	197.889	170.965	134.348	138.658	150.341	143.091
ITSN2	1848.69	0.455347	0.0640061	7.11413	1.12623e-12	4.37181e-11	4.37181e-11	1666.75	1656.47	1692.05	1531.05	1401.47	1468.17	2356.98	2029.05	2165.69	1832.7	2392.84	1991.12
SIT1	942.41	0.862857	0.121313	7.11266	1.13826e-12	4.40861e-11	4.40861e-11	657.891	723.372	737.502	598.436	598.478	757.707	1441.61	1229.89	1188.53	944.082	1380.22	1051.2
CRIM1	803.441	0.910269	0.128028	7.10994	1.16092e-12	4.48629e-11	4.48629e-11	503.741	494.097	446.857	783.519	749.088	717.331	1129.85	1202.06	899.235	973.019	814.75	927.753
DBI	4331.67	-0.452475	0.0637234	-7.10061	1.24203e-12	4.78903e-11	4.78903e-11	4639.65	4584.61	4352.16	5164.85	5402.16	5200	3146.33	4329.8	3639.03	4283.94	3076.65	4160.86
ST6GALNAC5	151.481	1.1798	0.166311	7.09395	1.30336e-12	5.01429e-11	5.01429e-11	181.677	166.18	178.743	2.05648	0	1.71816	432.261	0	464.843	7.23435	381.186	1.87047
KCNMB1	171.594	1.5201	0.21435	7.09165	1.32522e-12	5.08706e-11	5.08706e-11	77.0751	67.5384	88.6204	77.118	77.6832	93.6396	383.617	280.966	294.67	241.145	239.575	137.48
IKZF2	2737.15	-1.08693	0.153512	-7.08039	1.43753e-12	5.49968e-11	5.49968e-11	3636.29	3211.63	3264.69	4433.77	4126.72	4003.31	1700.3	2230.5	1630.09	2105.19	1036.87	1466.45
CLCN4	307.035	0.961684	0.135826	7.08024	1.43907e-12	5.49968e-11	5.49968e-11	268.387	258.601	295.902	134.699	149.025	134.875	588.14	259.761	496.191	207.385	606.212	285.247
UAP1L1	102.449	-1.71147	0.241735	-7.07993	1.44226e-12	5.49969e-11	5.49969e-11	203.699	177.733	168.98	152.18	176.769	161.507	30.9547	17.2291	17.913	60.2862	37.8277	24.3161
TIMM13	1720.18	-0.503708	0.071161	-7.07843	1.45797e-12	5.54736e-11	5.54736e-11	1807.14	1922.18	1871.54	2235.39	2068.12	2304.91	1244.82	1594.35	1404.38	1454.1	1272.56	1462.71
LINC01684	42.4559	1.76459	0.249343	7.07695	1.47362e-12	5.59458e-11	5.59458e-11	12.3871	11.5526	7.51021	13.3671	9.51223	20.6179	116.08	71.5669	61.8	44.6118	83.4148	57.0493
JAK2	217.097	0.967255	0.137158	7.05211	1.76227e-12	6.67574e-11	6.67574e-11	170.666	159.071	153.959	148.067	160.915	125.425	350.452	250.484	300.939	218.236	345.299	221.651
ERAP2	1143.54	0.676956	0.0960734	7.04624	1.83816e-12	6.94801e-11	6.94801e-11	851.955	885.108	793.078	958.32	994.028	903.751	1542.21	1550.62	1313.03	1314.24	1263.83	1352.35
RBM38	934.817	-0.746559	0.106077	-7.03791	1.95145e-12	7.36012e-11	7.36012e-11	1081.8	1191.7	1117.52	1162.94	1261.96	1318.69	617.989	654.705	655.617	626.977	698.357	829.554
HOXC6	70.8466	-1.6946	0.240911	-7.03414	2.00495e-12	7.54543e-11	7.54543e-11	115.613	145.741	144.947	95.6263	103.049	97.0759	26.5326	11.9278	11.6435	36.1717	29.0982	32.7332
LAMP2	1971.7	0.438394	0.0623648	7.02951	2.07255e-12	7.78289e-11	7.78289e-11	1705.29	1785.32	1612.44	1777.83	1632.14	1627.09	2299.49	2113.87	2387.81	2193.21	2255.11	2270.75
RESF1	2063.75	0.491539	0.0699376	7.02824	2.0915e-12	7.83698e-11	7.83698e-11	1969.54	1963.06	1938.38	1662.66	1592.51	1580.7	2962.81	2019.78	2585.75	1744.68	2762.39	1982.7
IL4R	344.097	0.835521	0.119095	7.01555	2.2904e-12	8.5637e-11	8.5637e-11	244.989	265.71	220.049	189.196	228.294	201.024	453.266	482.414	483.652	462.998	411.255	486.322
IGSF3	982.127	-0.810615	0.115604	-7.01203	2.34892e-12	8.76356e-11	8.76356e-11	1186.41	1150.82	1097.24	1337.74	1337.26	1187.25	683.215	930.37	542.765	718.612	669.259	944.588
ENSG00000227706	120.614	-1.49782	0.213777	-7.00647	2.44414e-12	9.09915e-11	9.09915e-11	139.011	199.949	196.016	159.377	222.745	258.583	43.1155	45.0606	34.9304	48.229	60.1363	40.2151
BMPR1A	1124.26	0.767299	0.109581	7.0021	2.52158e-12	9.36726e-11	9.36726e-11	878.106	828.234	837.388	880.174	799.82	750.835	1658.29	1554.59	1469.76	1313.03	1319.12	1201.78
DDX60L	413.593	0.794868	0.113549	7.0002	2.55602e-12	9.47483e-11	9.47483e-11	308.301	324.362	263.608	337.263	282.989	279.201	557.185	538.077	514.104	499.17	527.647	531.214
ABLIM1	441.96	-0.80803	0.115466	-6.99797	2.59692e-12	9.60577e-11	9.60577e-11	385.376	406.119	358.988	745.474	711.832	720.767	206.733	414.823	224.809	417.181	200.778	510.638
PRRT2	56.1069	-1.69303	0.241941	-6.99767	2.60247e-12	9.60577e-11	9.60577e-11	63.3117	72.8704	93.8776	91.5134	130.001	111.68	9.94973	14.5784	8.95652	26.5259	12.6092	37.4094
ENSG00000273084	114.064	-1.13989	0.162983	-6.99389	2.67365e-12	9.84747e-11	9.84747e-11	170.666	167.957	144.947	143.954	156.159	148.621	65.226	79.5188	68.9652	78.3721	62.0762	82.3007
RRAGD	279.123	-0.892911	0.127862	-6.98342	2.88088e-12	1.05882e-10	1.05882e-10	315.182	367.018	343.216	387.647	369.392	344.49	202.311	220.002	160.322	224.265	167.8	247.837
SGTA	2824.35	-0.41354	0.0592856	-6.97539	3.05025e-12	1.11869e-10	1.11869e-10	3001.8	3228.51	3137.01	3124.82	3375.26	3431.16	2192.26	2534	2448.71	2480.17	2364.71	2573.77
ATXN1	280.248	1.52516	0.21893	6.96643	3.25087e-12	1.18974e-10	1.18974e-10	130.752	131.522	142.694	117.219	113.354	90.2032	343.819	209.399	712.043	447.324	566.445	358.195
NHP2	3497.33	-0.549384	0.0791688	-6.93939	3.93785e-12	1.43811e-10	1.43811e-10	3812.47	4110.96	3964.64	4044.07	3998.31	4517.04	2439.9	3194	3022.83	3218.08	2580.04	3065.7
CORO1A	6243.4	0.687422	0.0990731	6.93853	3.96194e-12	1.44385e-10	1.44385e-10	5025.02	5004.06	4198.2	4688.78	5141.36	4364.12	8634.16	8569.47	7695.44	6958.23	7027.21	7614.69
ENDOD1	258.773	-0.969698	0.139881	-6.9323	4.14044e-12	1.50573e-10	1.50573e-10	320.688	316.364	338.71	374.279	393.172	361.672	144.824	164.339	142.409	157.95	181.379	209.493
DROSHA	2564.52	0.607323	0.0876426	6.92954	4.222e-12	1.53216e-10	1.53216e-10	1957.16	1947.06	2153.18	1935.15	2080.8	2214.7	2779.29	2788.46	3177.77	3102.33	3397.7	3240.59
HTATIP2	940.704	0.685682	0.0990536	6.92233	4.4428e-12	1.60891e-10	1.60891e-10	726.708	710.042	672.163	746.502	736.405	737.948	1087.84	1164.95	1340.79	1221.4	1023.29	1120.41
C1RL-AS1	313.806	1.0938	0.158062	6.92008	4.51397e-12	1.63126e-10	1.63126e-10	244.989	176.844	214.792	201.535	169.635	171.816	572.662	416.148	498.878	315.9	409.315	373.159
[truncated: 47,522 more rows]

## Sheet: Table S5
Supplementary Table S5. Enrichment analysis of MSI2 target genes identified by RIP-CHIP in SEM wt cells immunoprecipitated with anti-MSI2 antibody or IgG (mock).
[truncated: 664 more rows]

[truncated: 2 more sheets: Table S6, Table S7]
